# Supplementary material for: Changes in macrophage transcriptome associate with systemic sclerosis and mediate GSDMA contribution to disease risk
Source: Ann Rheum Dis. 2018 Jan 17;77(4):596–601. doi: 10.1136/annrheumdis-2017-212454 (PMC5890626; doi:10.1136/annrheumdis-2017-212454)
Supplement: Supplementary file 3 [file annrheumdis-2017-212454supp003.xlsx]

## Sheet: SSc MMDs DE and cis-eQTL
Supplementary Table S2. RNA-seq differential expression (DE) analysis between monocyte-derived macrophages (MDMs) from systemic sclerosis (SSc) patients and healthy controls together with SSc MDMs cis-eQTL results. Tab 1. DE results with the top cis-regulatory SNP (SNP with the smallest FDR for each gene among all the cis-eQTL tests performed). Base Mean refers to the mean of DESeq2 R package nor…
Gene Information					MDMs SSc against controls gene DE					cis-eQTL analysis results: top cis-regulatory SNP associated with the gene
External gene name	Ensembl Gene ID	Gene Biotype	Gene description		Base Mean	Log2 FC	DE P-value	DE FDR		Top cis-regulatory SNP	Chromosome	beta	cis-eQTL p-value	FDR
AC0072783	ENSG00000234389	sense_intronic			6.00082	-1.2389	5.8126e-08	0.00114485		rs2190360	2	0.186252	0.000326679	0.450931
IL18RAP	ENSG00000115607	protein_coding	interleukin 18 receptor accessory protein		90.2487	-1.13839	1.96735e-07	0.00129163		rs956966	2	0.40555	0.00196251	0.690946
HSD11B1	ENSG00000117594	protein_coding	hydroxysteroid (11-beta) dehydrogenase 1		381.367	-1.19281	1.76637e-07	0.00129163		kgp12478079	1	-1.06698	0.00750692	0.821427
TCN1	ENSG00000134827	protein_coding	transcobalamin I (vitamin B12 binding protein, R binder family)		27.6619	1.11898	5.30331e-07	0.00178209		kgp5419216	11	-0.457865	0.00254055	0.723074
BNC2	ENSG00000173068	protein_coding	basonuclin 2		72.4548	1.11482	7.38414e-07	0.00178209		-	-	-	-	-
CLDN14	ENSG00000159261	protein_coding	claudin 14		8.10291	-1.12648	8.1432e-07	0.00178209		-	-	-	-	-
AC0072782	ENSG00000236525	sense_intronic			1.97351	-1.14442	7.90731e-07	0.00178209		rs956966	2	0.0688016	0.00261936	0.726348
DOK5	ENSG00000101134	protein_coding	docking protein 5		2.38664	-1.15583	6.41817e-07	0.00178209		-	-	-	-	-
ERICH3	ENSG00000178965	protein_coding	glutamate-rich 3		3.59241	-1.19931	4.97729e-07	0.00178209		-	-	-	-	-
CD160	ENSG00000117281	protein_coding	CD160 molecule		7.46409	-1.11024	1.0832e-06	0.00213347		-	-	-	-	-
AATK	ENSG00000181409	protein_coding	apoptosis-associated tyrosine kinase		434.17	0.976378	1.43537e-06	0.0025701		rs4969260	17	-0.540097	0.000381287	0.474668
RP5-857K217	ENSG00000229344	unprocessed_pseudogene			268.543	-1.13825	1.6534e-06	0.00271377		rs9442387	1	-0.67614	0.0382467	0.918158
MTND1P23	ENSG00000225972	unprocessed_pseudogene	MT-ND1 pseudogene 23		380.244	1.11965	2.01368e-06	0.00280038		kgp6842358	1	-3.75753	0.00167191	0.67303
SCIMP	ENSG00000161929	protein_coding	SLP adaptor and CSK interacting membrane protein		701.86	-1.02469	2.1327e-06	0.00280038		kgp2453566	17	-0.577051	0.00515504	0.788068
ADD2	ENSG00000075340	protein_coding	adducin 2 (beta)		95.4123	-1.03516	2.10417e-06	0.00280038		rs17719042	2	0.329105	0.00290602	0.737047
KLRB1	ENSG00000111796	protein_coding	killer cell lectin-like receptor subfamily B, member 1		69.8072	-0.918069	2.95265e-06	0.0034209		kgp9123210	12	0.315891	0.00442516	0.775652
TNFSF4	ENSG00000117586	protein_coding	tumor necrosis factor (ligand) superfamily, member 4		55.8831	-1.02116	2.94665e-06	0.0034209		-	-	-	-	-
IL23R	ENSG00000162594	protein_coding	interleukin 23 receptor		9.12833	-1.00496	3.77687e-06	0.00413274		-	-	-	-	-
TSLP	ENSG00000145777	protein_coding	thymic stromal lymphopoietin		21.3185	1.07102	4.70898e-06	0.00441658		-	-	-	-	-
SLC16A10	ENSG00000112394	protein_coding	solute carrier family 16 (aromatic amino acid transporter), member 10		879.688	0.942907	4.67286e-06	0.00441658		kgp8996379	6	-0.623099	0.00262932	0.726368
AFAP1L2	ENSG00000169129	protein_coding	actin filament associated protein 1-like 2		8.79121	-1.00935	4.37686e-06	0.00441658		-	-	-	-	-
KLRC1	ENSG00000134545	protein_coding	killer cell lectin-like receptor subfamily C, member 1		18.7592	-1.01807	5.32013e-06	0.00476297		-	-	-	-	-
AKR1C2	ENSG00000151632	protein_coding	aldo-keto reductase family 1, member C2		44.9814	1.07314	6.40624e-06	0.00548597		-	-	-	-	-
LTF	ENSG00000012223	protein_coding	lactotransferrin		76.6515	1.05709	8.4901e-06	0.00619337		-	-	-	-	-
DIS3L	ENSG00000166938	protein_coding	DIS3 like exosome 3'-5' exoribonuclease		318.966	-0.386429	7.88192e-06	0.00619337		kgp3209955	15	-0.214814	0.00095669	0.600548
INHBA	ENSG00000122641	protein_coding	inhibin, beta A		636.884	-1.00289	8.17695e-06	0.00619337		rs2282920	7	0.547953	0.00432518	0.774267
P2RY13	ENSG00000181631	protein_coding	purinergic receptor P2Y, G-protein coupled, 13		91.6611	-1.02958	7.93459e-06	0.00619337		kgp5264927	3	0.449484	0.000987313	0.605642
C1orf106	ENSG00000163362	protein_coding	chromosome 1 open reading frame 106		14.725	-0.994435	1.0232e-05	0.00719749		-	-	-	-	-
KIAA1377	ENSG00000110318	protein_coding	KIAA1377		12.102	-0.803907	1.50318e-05	0.0102092		-	-	-	-	-
CFAP46	ENSG00000171811	protein_coding	cilia and flagella associated protein 46		14.5345	1.02414	1.71092e-05	0.0112327		-	-	-	-	-
RP11-539I51	ENSG00000225302	antisense			9.61713	-0.93196	1.81796e-05	0.0115505		rs180727	10	0.0821008	0.00381256	0.762783
RAB27B	ENSG00000041353	protein_coding	RAB27B, member RAS oncogene family		15.1331	-0.911179	1.94697e-05	0.0119836		-	-	-	-	-
FASLG	ENSG00000117560	protein_coding	Fas ligand (TNF superfamily, member 6)		74.5829	-0.944451	2.21029e-05	0.0131921		rs12040255	1	0.749412	0.000374344	0.471115
CXCR6	ENSG00000172215	protein_coding	chemokine (C-X-C motif) receptor 6		36.2928	-0.895495	2.51197e-05	0.0145517		kgp6464931	3	0.417662	0.00262909	0.726368
FBLN5	ENSG00000140092	protein_coding	fibulin 5		80.0198	0.890076	2.98807e-05	0.0151065		kgp9255737	14	-0.615854	0.0160691	0.875032
BZRAP1	ENSG00000005379	protein_coding	benzodiazepine receptor (peripheral) associated protein 1		101.416	-0.751737	3.54648e-05	0.0151065		kgp1679665	17	-0.335406	0.00155633	0.663835
LINC00221	ENSG00000270816	lincRNA	long intergenic non-protein coding RNA 221		1.91741	-0.762652	3.39591e-05	0.0151065		-	-	-	-	-
LRRC16B	ENSG00000186648	protein_coding	leucine rich repeat containing 16B		108.972	-0.797573	3.17945e-05	0.0151065		kgp6833556	14	0.338751	0.00501844	0.786283
SYTL2	ENSG00000137501	protein_coding	synaptotagmin-like 2		104.663	-0.832811	3.01708e-05	0.0151065		kgp3870922	11	0.488628	0.000122919	0.307297
AUTS2	ENSG00000158321	protein_coding	autism susceptibility candidate 2		133.203	-0.854538	3.08061e-05	0.0151065		kgp3370614	7	-0.435803	0.00645502	0.80903
RP11-81H141	ENSG00000273824	lincRNA			11.8595	-0.856661	3.701e-05	0.0151065		-	-	-	-	-
PLA1A	ENSG00000144837	protein_coding	phospholipase A1 member A		3.11577	-0.894216	3.53748e-05	0.0151065		-	-	-	-	-
KIAA1217	ENSG00000120549	protein_coding	KIAA1217		8.9476	-0.927994	3.37651e-05	0.0151065		-	-	-	-	-
TBC1D27	ENSG00000128438	transcribed_unprocessed_pseudogene	TBC1 domain family, member 27		11.1552	-0.948824	3.65328e-05	0.0151065		rs906405	17	0.14212	0.0244328	0.897257
TRAV1-2	ENSG00000256553	TR_V_gene	T cell receptor alpha variable 1-2		5.00706	-0.965286	3.75823e-05	0.0151065		rs9972232	14	0.583093	0.000398456	0.479074
GZMB	ENSG00000100453	protein_coding	granzyme B (granzyme 2, cytotoxic T-lymphocyte-associated serine esterase 1)		219.751	-0.967413	3.05321e-05	0.0151065		rs10483296	14	1.14259	0.00582769	0.799259
SLC4A10	ENSG00000144290	protein_coding	solute carrier family 4, sodium bicarbonate transporter, member 10		9.99955	-0.973094	3.50777e-05	0.0151065		-	-	-	-	-
APOBEC3A	ENSG00000128383	protein_coding	apolipoprotein B mRNA editing enzyme, catalytic polypeptide-like 3A		491.719	-0.981709	3.56883e-05	0.0151065		kgp5592858	22	1.24473	0.000440145	0.495395
RP11-283G64	ENSG00000256234	antisense			6.71519	-0.990804	3.26887e-05	0.0151065		kgp11791942	12	0.485872	0.00100125	0.607906
TARBP1	ENSG00000059588	protein_coding	TAR (HIV-1) RNA binding protein 1		524.907	-0.354009	4.13814e-05	0.016301		rs875268	1	-0.190076	0.000896937	0.590907
ZNF618	ENSG00000157657	protein_coding	zinc finger protein 618		229.069	-0.782347	4.42216e-05	0.0163945		kgp329733	9	0.414682	0.00385646	0.763966
MYB	ENSG00000118513	protein_coding	v-myb avian myeloblastosis viral oncogene homolog		84.9074	-0.898314	4.49485e-05	0.0163945		kgp10521195	6	0.291208	0.00407852	0.768369
ST8SIA5	ENSG00000101638	protein_coding	ST8 alpha-N-acetyl-neuraminide alpha-2,8-sialyltransferase 5		3.92885	-0.934195	4.33017e-05	0.0163945		-	-	-	-	-
LINC00892	ENSG00000233093	processed_transcript	long intergenic non-protein coding RNA 892		9.73481	-0.956022	4.39686e-05	0.0163945		-	-	-	-	-
OLIG1	ENSG00000184221	protein_coding	oligodendrocyte transcription factor 1		15.6647	0.953885	5.06116e-05	0.016448		-	-	-	-	-
MRO	ENSG00000134042	protein_coding	maestro		117.369	0.935091	4.65141e-05	0.016448		kgp9018093	18	-0.840297	0.00204186	0.694372
PID1	ENSG00000153823	protein_coding	phosphotyrosine interaction domain containing 1		1964.17	0.757043	4.96024e-05	0.016448		kgp6022289	2	0.547314	0.00290375	0.737035
CDS1	ENSG00000163624	protein_coding	CDP-diacylglycerol synthase (phosphatidate cytidylyltransferase) 1		59.4869	-0.731757	4.89035e-05	0.016448		-	-	-	-	-
SLFN12L	ENSG00000205045	protein_coding	schlafen family member 12-like		140.867	-0.865102	5.05318e-05	0.016448		rs6505413	17	0.428735	0.0056173	0.795591
ZBED6CL	ENSG00000188707	protein_coding	ZBED6 C-terminal like		91.808	-0.894996	4.95049e-05	0.016448		kgp5700957	7	-0.401515	0.00144492	0.654802
PTCHD1	ENSG00000165186	protein_coding	patched domain containing 1		2.76885	-0.938714	5.09407e-05	0.016448		-	-	-	-	-
SCART1	ENSG00000214279	unitary_pseudogene	scavenger receptor protein family member		15.9963	-0.756805	5.28672e-05	0.0167947		kgp10598060	10	0.236472	0.000430854	0.492813
GATM	ENSG00000171766	protein_coding	glycine amidinotransferase (L-arginine:glycine amidinotransferase)		633.039	0.844428	5.4723e-05	0.0171083		kgp7412730	15	0.762802	0.000221003	0.395409
IFNB1	ENSG00000171855	protein_coding	interferon, beta 1, fibroblast		7.76419	-0.956786	5.98854e-05	0.0184297		-	-	-	-	-
CYP4F3	ENSG00000186529	protein_coding	cytochrome P450, family 4, subfamily F, polypeptide 3		17.4202	0.945143	6.84478e-05	0.0200746		-	-	-	-	-
SAMD3	ENSG00000164483	protein_coding	sterile alpha motif domain containing 3		51.1709	-0.806905	6.69677e-05	0.0200746		rs2326794	6	-0.394918	0.00101043	0.609306
NEXN	ENSG00000162614	protein_coding	nexilin (F actin binding protein)		31.8427	-0.872101	6.87295e-05	0.0200746		-	-	-	-	-
ZBTB32	ENSG00000011590	protein_coding	zinc finger and BTB domain containing 32		27.3822	-0.944276	6.93071e-05	0.0200746		-	-	-	-	-
S100P	ENSG00000163993	protein_coding	S100 calcium binding protein P		4.32585	0.946076	7.50075e-05	0.0202208		-	-	-	-	-
DPY19L3	ENSG00000178904	protein_coding	dpy-19-like 3 (C. elegans)		301.838	-0.403721	8.21429e-05	0.0202208		kgp9183779	19	-0.125618	0.00966764	0.840568
CLIC3	ENSG00000169583	protein_coding	chloride intracellular channel 3		30.3142	-0.794422	8.14692e-05	0.0202208		kgp264747	9	-0.540676	0.0029874	0.73991
TOX	ENSG00000198846	protein_coding	thymocyte selection-associated high mobility group box		32.5296	-0.823524	8.20632e-05	0.0202208		-	-	-	-	-
CDHR1	ENSG00000148600	protein_coding	cadherin-related family member 1		19.7488	-0.823785	8.29502e-05	0.0202208		-	-	-	-	-
CTSW	ENSG00000172543	protein_coding	cathepsin W		175.112	-0.83187	8.31581e-05	0.0202208		rs2009453	11	-0.687692	0.000282409	0.43235
ZBTB16	ENSG00000109906	protein_coding	zinc finger and BTB domain containing 16		10.875	-0.839542	7.36973e-05	0.0202208		-	-	-	-	-
CYSLTR2	ENSG00000152207	protein_coding	cysteinyl leukotriene receptor 2		43.0433	-0.87388	8.18297e-05	0.0202208		-	-	-	-	-
ZNF702P	ENSG00000242779	transcribed_processed_pseudogene	zinc finger protein 702, pseudogene		64.7341	-0.877632	7.86281e-05	0.0202208		kgp4706591	19	-0.645581	0.000380282	0.474553
AC0070366	ENSG00000227017	lincRNA			6.09594	-0.915604	8.02349e-05	0.0202208		rs6953710	7	-0.307109	0.00126004	0.634972
TRIM10	ENSG00000204613	protein_coding	tripartite motif containing 10		1.26768	-0.916991	7.19855e-05	0.0202208		-	-	-	-	-
ESPNL	ENSG00000144488	protein_coding	espin-like		2.89219	-0.924604	7.59986e-05	0.0202208		-	-	-	-	-
RXFP1	ENSG00000171509	protein_coding	relaxin/insulin-like family peptide receptor 1		2.30187	-0.935938	8.14125e-05	0.0202208		-	-	-	-	-
HEY1	ENSG00000164683	protein_coding	hes-related family bHLH transcription factor with YRPW motif 1		107.057	0.917954	8.90585e-05	0.0205317		kgp5155464	8	0.942231	0.00177041	0.67984
ALPK1	ENSG00000073331	protein_coding	alpha-kinase 1		869.868	-0.552512	8.9649e-05	0.0205317		kgp439334	4	0.219318	0.00570604	0.79713
C1RL-AS1	ENSG00000205885	antisense	C1RL antisense RNA 1		41.9983	-0.847455	8.77839e-05	0.0205317		rs9668071	12	0.508066	0.00135369	0.644738
LRRC61	ENSG00000127399	protein_coding	leucine rich repeat containing 61		53.0371	-0.884229	8.76026e-05	0.0205317		rs6977381	7	0.588343	0.000957849	0.600734
KCNJ10	ENSG00000177807	protein_coding	potassium channel, inwardly rectifying subfamily J, member 10		13.3769	-0.917821	8.6003e-05	0.0205317		-	-	-	-	-
RNF220	ENSG00000187147	protein_coding	ring finger protein 220		911.028	0.206473	9.25623e-05	0.0208654		rs12022162	1	0.120178	0.0234422	0.895562
GOLGA8N	ENSG00000232653	protein_coding	golgin A8 family, member N		203.376	-0.553715	9.32247e-05	0.0208654		rs16969325	15	-0.336424	0.00343854	0.752676
KRT86	ENSG00000170442	protein_coding	keratin 86		6.4875	-0.913875	9.45126e-05	0.020916		-	-	-	-	-
HMGA2	ENSG00000149948	protein_coding	high mobility group AT-hook 2		13.8393	0.880155	9.57194e-05	0.0209477		-	-	-	-	-
MADD	ENSG00000110514	protein_coding	MAP-kinase activating death domain		2847.68	-0.311647	9.90178e-05	0.0211935		kgp10876897	11	0.173077	0.0110841	0.84954
APOBEC3G	ENSG00000239713	protein_coding	apolipoprotein B mRNA editing enzyme, catalytic polypeptide-like 3G		916.127	-0.739833	0.000101363	0.0211935		kgp1209178	22	-0.537854	0.00217058	0.703099
LAG3	ENSG00000089692	protein_coding	lymphocyte-activation gene 3		113.585	-0.894347	0.000102223	0.0211935		kgp1064516	12	1.17169	0.000360148	0.464576
TERT	ENSG00000164362	protein_coding	telomerase reverse transcriptase		1.44644	-0.920916	0.000101339	0.0211935		-	-	-	-	-
CCL24	ENSG00000106178	protein_coding	chemokine (C-C motif) ligand 24		635.834	-0.92814	9.85639e-05	0.0211935		rs13340504	7	1.60133	0.00306155	0.74242
RP11-576I222	ENSG00000231407	antisense			5.25182	-0.850275	0.000105786	0.0215395		kgp6836973	1	0.156132	0.000227572	0.398517
ZBP1	ENSG00000124256	protein_coding	Z-DNA binding protein 1		73.9673	-0.857541	0.000106079	0.0215395		kgp6937135	20	0.753653	0.00158625	0.665416
NCR1	ENSG00000189430	protein_coding	natural cytotoxicity triggering receptor 1		16.0928	-0.766097	0.000108455	0.021598		rs6509880	19	-0.283917	0.000877765	0.588118
FAM124A	ENSG00000150510	protein_coding	family with sequence similarity 124A		133.404	-0.865243	0.00010856	0.021598		rs2408213	13	0.501159	0.00126921	0.635781
ZNF91	ENSG00000167232	protein_coding	zinc finger protein 91		415.782	-0.267589	0.000109776	0.0216214		rs1023718	19	0.152726	0.00498097	0.785569
KITLG	ENSG00000049130	protein_coding	KIT ligand		478.691	0.758544	0.000113009	0.0220378		kgp2788522	12	-0.582297	0.00221119	0.705415
SH2D1A	ENSG00000183918	protein_coding	SH2 domain containing 1A		90.949	-0.790356	0.000115488	0.0220669		-	-	-	-	-
CD70	ENSG00000125726	protein_coding	CD70 molecule		38.9937	-0.826281	0.000116519	0.0220669		kgp7680772	19	-0.415508	0.00568839	0.796679
RP5-1031D43	ENSG00000278982	TEC			34.3624	-0.827492	0.000114432	0.0220669		-	-	-	-	-
RETN	ENSG00000104918	protein_coding	resistin		9.62001	0.915771	0.00012486	0.023		-	-	-	-	-
GPR35	ENSG00000178623	protein_coding	G protein-coupled receptor 35		412.859	0.784595	0.000130788	0.023		rs10933584	2	0.808918	0.000526986	0.522654
ZNF44	ENSG00000197857	protein_coding	zinc finger protein 44		171.004	-0.329457	0.000127492	0.023		kgp10700053	19	0.135076	0.00487553	0.784165
TRDC	ENSG00000211829	TR_C_gene	T cell receptor delta constant		93.7881	-0.828818	0.000130187	0.023		kgp10367659	14	0.603735	0.00142735	0.653422
IL2RB	ENSG00000100385	protein_coding	interleukin 2 receptor, beta		1001.32	-0.829997	0.000127894	0.023		kgp5592858	22	0.718511	0.00387101	0.76453
GZMA	ENSG00000145649	protein_coding	granzyme A (granzyme 1, cytotoxic T-lymphocyte-associated serine esterase 3)		138.828	-0.841269	0.000123896	0.023		kgp10747984	5	0.782432	0.00129097	0.637944
HPDL	ENSG00000186603	protein_coding	4-hydroxyphenylpyruvate dioxygenase-like		4.91859	-0.866856	0.000127723	0.023		-	-	-	-	-
HNRNPA1P21	ENSG00000228168	processed_pseudogene	heterogeneous nuclear ribonucleoprotein A1 pseudogene 21		6.01829	-0.880759	0.000129913	0.023		rs1274958	3	0.291389	0.000883843	0.5893
APOBEC3C	ENSG00000244509	protein_coding	apolipoprotein B mRNA editing enzyme, catalytic polypeptide-like 3C		1627.46	-0.505147	0.000133321	0.023238		kgp7172913	22	0.39504	4.72477e-06	0.0449979
APOBEC3F	ENSG00000128394	protein_coding	apolipoprotein B mRNA editing enzyme, catalytic polypeptide-like 3F		130.649	-0.704667	0.000136794	0.0236341		kgp11218310	22	0.525562	0.0030807	0.743584
GOLGA8R	ENSG00000186399	protein_coding	golgin A8 family, member R		30.0667	-0.654847	0.000144184	0.0246249		-	-	-	-	-
RP11-81H142	ENSG00000251301	lincRNA			14.5636	-0.815995	0.000145029	0.0246249		kgp3642866	12	0.45834	0.00152317	0.660153
LTA	ENSG00000226979	protein_coding	lymphotoxin alpha		120.438	-0.822822	0.0001489	0.0250661		rs3828840	6	0.627829	0.000587349	0.534544
RORC	ENSG00000143365	protein_coding	RAR-related orphan receptor C		20.082	-0.857226	0.000150601	0.0251376		-	-	-	-	-
CHST12	ENSG00000136213	protein_coding	carbohydrate (chondroitin 4) sulfotransferase 12		217.049	-0.538511	0.000153584	0.0252745		rs12056190	7	-0.206585	0.00276853	0.731736
FSD1	ENSG00000105255	protein_coding	fibronectin type III and SPRY domain containing 1		8.51282	-0.834856	0.000153987	0.0252745		-	-	-	-	-
ZNF682	ENSG00000197124	protein_coding	zinc finger protein 682		34.8415	-0.622031	0.000160575	0.0253121		rs2304128	19	0.353252	0.00180787	0.682679
TXK	ENSG00000074966	protein_coding	TXK tyrosine kinase		110.099	-0.67793	0.000157805	0.0253121		kgp2129648	4	-0.412278	0.0131442	0.860319
APOBEC3D	ENSG00000243811	protein_coding	apolipoprotein B mRNA editing enzyme, catalytic polypeptide-like 3D		127.255	-0.76272	0.000158927	0.0253121		kgp2632332	22	0.738263	0.00236384	0.712895
XCL1	ENSG00000143184	protein_coding	chemokine (C motif) ligand 1		20.631	-0.865939	0.000160642	0.0253121		-	-	-	-	-
TOMM20P2	ENSG00000255987	processed_pseudogene	TOMM20 pseudogene 2		7.46838	-0.881583	0.000159334	0.0253121		rs1001441	17	-0.575667	0.00235629	0.712047
GRB10	ENSG00000106070	protein_coding	growth factor receptor-bound protein 10		282.069	0.712014	0.000168116	0.0262794		rs2237447	7	0.487833	2.87358e-05	0.140804
FGF13	ENSG00000129682	protein_coding	fibroblast growth factor 13		3.70716	0.893093	0.000181019	0.0271344		-	-	-	-	-
LYVE1	ENSG00000133800	protein_coding	lymphatic vessel endothelial hyaluronan receptor 1		92.2047	0.876378	0.000178015	0.0271344		-	-	-	-	-
PROK2	ENSG00000163421	protein_coding	prokineticin 2		29.3365	0.864381	0.000188265	0.0271344		-	-	-	-	-
DYX1C1	ENSG00000256061	protein_coding	dyslexia susceptibility 1 candidate 1		13.382	0.813166	0.000192167	0.0271344		-	-	-	-	-
CTD-2015H63	ENSG00000249042	antisense			7.57327	0.797266	0.000192257	0.0271344		kgp5892173	5	0.344128	0.00140988	0.650678
FAM122B	ENSG00000156504	protein_coding	family with sequence similarity 122B		552.607	-0.271045	0.000197006	0.0271344		-	-	-	-	-
SYMPK	ENSG00000125755	protein_coding	symplekin		1351.25	-0.327574	0.000175221	0.0271344		rs157582	19	-0.165586	0.0031527	0.74386
LINC00937	ENSG00000226091	lincRNA	long intergenic non-protein coding RNA 937		203.327	-0.755897	0.000185725	0.0271344		kgp5530073	12	-0.709022	1.23056e-05	0.084478
AL4509922	ENSG00000234614	antisense			7.37532	-0.756564	0.000196365	0.0271344		rs1045298	1	0.531439	0.000200545	0.38018
CMAHP	ENSG00000168405	unitary_pseudogene	cytidine monophospho-N-acetylneuraminic acid hydroxylase, pseudogene		150.599	-0.771893	0.000182496	0.0271344		kgp1993389	6	-0.51034	0.00155943	0.664024
JAKMIP1	ENSG00000152969	protein_coding	janus kinase and microtubule interacting protein 1		17.0165	-0.812194	0.000186974	0.0271344		-	-	-	-	-
SH2D2A	ENSG00000027869	protein_coding	SH2 domain containing 2A		129.826	-0.812286	0.000186474	0.0271344		kgp10204816	1	-0.934868	0.000299247	0.438793
RP11-1094M145	ENSG00000267074	sense_intronic			14.9292	-0.824467	0.000180948	0.0271344		rs11653310	17	-0.380439	0.00064609	0.543698
IRF4	ENSG00000137265	protein_coding	interferon regulatory factor 4		357.555	-0.837558	0.000195868	0.0271344		kgp4308542	6	0.792805	0.00432322	0.774267
FAM26E	ENSG00000178033	protein_coding	family with sequence similarity 26, member E		15.7188	-0.85627	0.000195145	0.0271344		-	-	-	-	-
RP11-876N241	ENSG00000262488	processed_pseudogene			2.1952	-0.870722	0.000192744	0.0271344		rs1071458	16	-0.0967723	0.0024638	0.717367
CFAP57	ENSG00000243710	protein_coding	cilia and flagella associated protein 57		2.18775	-0.886682	0.000193534	0.0271344		-	-	-	-	-
KCNA1	ENSG00000111262	protein_coding	potassium channel, voltage gated shaker related subfamily A, member 1		8.23215	0.885183	0.000202698	0.0275333		-	-	-	-	-
SH3BP4	ENSG00000130147	protein_coding	SH3-domain binding protein 4		39.8942	0.712523	0.000201624	0.0275333		-	-	-	-	-
TBC1D9B	ENSG00000197226	protein_coding	TBC1 domain family, member 9B (with GRAM domain)		4671.84	0.367843	0.000209782	0.027918		rs6886960	5	-0.258739	0.00394505	0.765596
CLIC5	ENSG00000112782	protein_coding	chloride intracellular channel 5		81.7953	-0.811818	0.000208234	0.027918		-	-	-	-	-
SLC1A1	ENSG00000106688	protein_coding	solute carrier family 1 (neuronal/epithelial high affinity glutamate transporter, system Xag), member 1		1.79811	-0.880626	0.000209335	0.027918		-	-	-	-	-
XYLT1	ENSG00000103489	protein_coding	xylosyltransferase I		1270.96	0.562461	0.000218198	0.0288432		rs12596741	16	0.285908	0.000897562	0.591008
PADI4	ENSG00000159339	protein_coding	peptidyl arginine deiminase, type IV		18.2529	0.875842	0.000221698	0.0289179		-	-	-	-	-
NCR3	ENSG00000204475	protein_coding	natural cytotoxicity triggering receptor 3		21.0833	-0.798271	0.0002217	0.0289179		rs3828840	6	0.445785	0.000215033	0.392113
NT5DC4	ENSG00000144130	protein_coding	5'-nucleotidase domain containing 4		4.25984	-0.794689	0.000223648	0.0289801		-	-	-	-	-
CXCL9	ENSG00000138755	protein_coding	chemokine (C-X-C motif) ligand 9		12960.6	-0.875195	0.000225419	0.0290187		kgp7985649	4	2.00508	0.00130735	0.639757
PRF1	ENSG00000180644	protein_coding	perforin 1 (pore forming protein)		261.141	-0.825805	0.000230889	0.0295297		rs2642589	10	1.0165	0.000700335	0.554921
FAM110A	ENSG00000125898	protein_coding	family with sequence similarity 110, member A		364.61	0.445558	0.000235147	0.0298804		kgp5803031	20	0.255484	0.000495384	0.514088
PLCXD2	ENSG00000240891	protein_coding	phosphatidylinositol-specific phospholipase C, X domain containing 2		17.6057	-0.747007	0.000238562	0.0301199		kgp9888329	3	0.411527	5.72022e-05	0.20729
RP11-686D2210	ENSG00000267554	processed_pseudogene			22.5295	-0.791016	0.000245059	0.0305486		rs213140	17	-0.800991	0.0161663	0.875226
RP11-757G16	ENSG00000250508	lincRNA			11.3456	-0.851166	0.000244961	0.0305486		rs622082	11	-0.1618	5.92375e-05	0.212334
RP11-876N245	ENSG00000263013	sense_intronic			39.5182	-0.449133	0.000256497	0.0317734		kgp9579061	16	-0.200342	0.000707836	0.556155
RP11-141C74	ENSG00000272792	lincRNA			2.40987	-0.820601	0.000260679	0.0320896		kgp8946555	3	0.361346	0.000333867	0.453093
ATP7B	ENSG00000123191	protein_coding	ATPase, Cu++ transporting, beta polypeptide		29.6876	0.661992	0.000269991	0.0330295		-	-	-	-	-
DNER	ENSG00000187957	protein_coding	delta/notch-like EGF repeat containing		11.0307	0.834617	0.000276222	0.0330369		-	-	-	-	-
RABAC1	ENSG00000105404	protein_coding	Rab acceptor 1 (prenylated)		579.108	0.334383	0.000279806	0.0330369		kgp334920	19	0.182568	0.00666786	0.812145
SH2D1B	ENSG00000198574	protein_coding	SH2 domain containing 1B		69.0064	-0.762452	0.000280116	0.0330369		rs4500290	1	-0.349572	0.00470109	0.781012
CDCA7	ENSG00000144354	protein_coding	cell division cycle associated 7		76.7931	-0.788242	0.000278841	0.0330369		rs1971862	2	0.556511	0.000472752	0.507061
RP11-326G211	ENSG00000272755	lincRNA			2.28165	-0.844658	0.000279683	0.0330369		kgp6956897	1	-0.192955	0.0158745	0.873843
PLEKHS1	ENSG00000148735	protein_coding	pleckstrin homology domain containing, family S member 1		1.5379	-0.866215	0.00027947	0.0330369		-	-	-	-	-
ERP27	ENSG00000139055	protein_coding	endoplasmic reticulum protein 27		20.8444	-0.507784	0.000283748	0.033266		-	-	-	-	-
C5	ENSG00000106804	protein_coding	complement component 5		195.485	-0.569266	0.000291939	0.0340238		rs10984840	9	0.26286	0.00155177	0.662992
TIAM2	ENSG00000146426	protein_coding	T-cell lymphoma invasion and metastasis 2		70.3326	-0.582065	0.000295643	0.0340526		kgp4897527	6	0.312784	6.96445e-06	0.058843
TLR3	ENSG00000164342	protein_coding	toll-like receptor 3		59.4625	-0.737297	0.000295294	0.0340526		rs10004538	4	-0.391126	0.000532084	0.523655
CENPV	ENSG00000166582	protein_coding	centromere protein V		27.0417	-0.655021	0.000299743	0.0341257		kgp1734105	17	0.25291	0.00195148	0.690382
ICOS	ENSG00000163600	protein_coding	inducible T-cell co-stimulator		168.059	-0.82474	0.000299523	0.0341257		kgp1177384	2	0.60916	0.00302638	0.74106
MAST4	ENSG00000069020	protein_coding	microtubule associated serine/threonine kinase family member 4		104.009	-0.661293	0.000307666	0.0347989		-	-	-	-	-
XCL2	ENSG00000143185	protein_coding	chemokine (C motif) ligand 2		17.0958	-0.83463	0.00030919	0.0347989		kgp1898460	1	0.721798	0.000893735	0.590331
NLRC5	ENSG00000140853	protein_coding	NLR family, CARD domain containing 5		2349.51	-0.677589	0.000314877	0.0352376		kgp809911	16	-0.530762	0.000416752	0.485541
PABPC1L	ENSG00000101104	protein_coding	poly(A) binding protein, cytoplasmic 1-like		103.25	-0.564846	0.000327432	0.0363765		kgp3127399	20	-0.277536	0.00105797	0.61436
HOXB3	ENSG00000120093	protein_coding	homeobox B3		8.04336	-0.781814	0.000330569	0.0363765		-	-	-	-	-
LINC01260	ENSG00000132832	antisense	long intergenic non-protein coding RNA 1260		6.87826	-0.824055	0.000330594	0.0363765		rs2027871	20	0.231724	0.000722	0.559501
GOLGA8B	ENSG00000215252	protein_coding	golgin A8 family, member B		689.139	-0.605762	0.000336006	0.0367665		rs4924045	15	-0.66221	0.00135643	0.645157
THBS1	ENSG00000137801	protein_coding	thrombospondin 1		14321	0.815656	0.000339997	0.0369976		rs1017843	15	0.743081	0.00460565	0.779367
KLRF1	ENSG00000150045	protein_coding	killer cell lectin-like receptor subfamily F, member 1		29.7129	-0.713429	0.000347944	0.0372767		rs2417750	12	0.308485	0.000910956	0.593135
SLC27A2	ENSG00000140284	protein_coding	solute carrier family 27 (fatty acid transporter), member 2		38.8426	-0.812382	0.000348239	0.0372767		-	-	-	-	-
FCRL4	ENSG00000163518	protein_coding	Fc receptor-like 4		3.93731	-0.852366	0.000345876	0.0372767		-	-	-	-	-
FFAR3	ENSG00000185897	protein_coding	free fatty acid receptor 3		19.0916	0.804529	0.000354601	0.0377525		-	-	-	-	-
YES1	ENSG00000176105	protein_coding	YES proto-oncogene 1, Src family tyrosine kinase		38.9894	-0.687118	0.000374813	0.0395463		-	-	-	-	-
TMEM130	ENSG00000166448	protein_coding	transmembrane protein 130		12.5217	-0.846907	0.000375465	0.0395463		-	-	-	-	-
SLA2	ENSG00000101082	protein_coding	Src-like-adaptor 2		139.433	-0.703411	0.000378384	0.0396143		kgp3215158	20	-0.412668	0.0033731	0.750013
CCR4	ENSG00000183813	protein_coding	chemokine (C-C motif) receptor 4		210.224	-0.765786	0.000382144	0.0396143		kgp273642	3	0.433428	0.00955415	0.840004
NCR2	ENSG00000096264	protein_coding	natural cytotoxicity triggering receptor 2		1.36835	-0.833453	0.000380645	0.0396143		-	-	-	-	-
VNN3	ENSG00000093134	protein_coding	vanin 3		24.5597	0.796307	0.000387017	0.0399093		-	-	-	-	-
HPS5	ENSG00000110756	protein_coding	Hermansky-Pudlak syndrome 5		1958.54	-0.420432	0.000394404	0.0404593		kgp3023890	11	-0.253765	0.00152921	0.66059
SGPP2	ENSG00000163082	protein_coding	sphingosine-1-phosphate phosphatase 2		3029.12	0.725262	0.000398767	0.0404851		kgp6510407	2	-1.03292	0.00737594	0.819387
KLRC2	ENSG00000205809	protein_coding	killer cell lectin-like receptor subfamily C, member 2		7.44147	-0.813177	0.000398358	0.0404851		-	-	-	-	-
KIT	ENSG00000157404	protein_coding	v-kit Hardy-Zuckerman 4 feline sarcoma viral oncogene homolog		38.7054	-0.668378	0.00040113	0.0405162		-	-	-	-	-
TNFRSF13B	ENSG00000240505	protein_coding	tumor necrosis factor receptor superfamily, member 13B		12.8323	-0.829628	0.000407025	0.0409019		-	-	-	-	-
CECR7	ENSG00000237438	lincRNA	cat eye syndrome chromosome region, candidate 7 (non-protein coding)		7.83307	-0.793801	0.000411654	0.041157		rs1867357	22	-0.198017	0.00182593	0.68403
PLA2G16	ENSG00000176485	protein_coding	phospholipase A2, group XVI		20.236	-0.724777	0.000419356	0.0417153		rs12420892	11	0.300472	0.00162807	0.668932
CRACR2A	ENSG00000130038	protein_coding	calcium release activated channel regulator 2A		114.779	-0.545339	0.00042391	0.0417467		kgp2648884	12	0.293273	0.000715536	0.558324
CPED1	ENSG00000106034	protein_coding	cadherin-like and PC-esterase domain containing 1		362.158	-0.65709	0.000422503	0.0417467		-	-	-	-	-
EDA	ENSG00000158813	protein_coding	ectodysplasin A		33.7011	0.649141	0.000428902	0.0418802		-	-	-	-	-
LINC00996	ENSG00000242258	lincRNA	long intergenic non-protein coding RNA 996		84.9001	-0.824669	0.000429519	0.0418802		rs10236214	7	0.730947	0.000469916	0.505932
ODF2L	ENSG00000122417	protein_coding	outer dense fiber of sperm tails 2-like		227.922	-0.474662	0.000440258	0.0427159		rs7518015	1	0.469434	0.000110477	0.292655
SHANK3	ENSG00000251322	processed_transcript	SH3 and multiple ankyrin repeat domains 3		19.6133	0.804528	0.000449751	0.0427937		rs131820	22	-0.143833	0.00436154	0.774922
ANKRD44	ENSG00000065413	protein_coding	ankyrin repeat domain 44		1117.32	-0.572582	0.000449471	0.0427937		rs2712867	2	-0.464137	0.000701062	0.554995
WARS	ENSG00000140105	protein_coding	tryptophanyl-tRNA synthetase		18592.7	-0.744286	0.000448754	0.0427937		rs7151803	14	1.19539	0.00188408	0.687397
UBD	ENSG00000213886	protein_coding	ubiquitin D		158.365	-0.835952	0.000444909	0.0427937		rs29221	6	0.803331	0.0393772	0.919343
TMPRSS13	ENSG00000137747	protein_coding	transmembrane protease, serine 13		51.7817	-0.737446	0.00045655	0.0432189		kgp7034990	11	0.245951	0.0129761	0.859686
AC00654828	ENSG00000280156	sense_overlapping			1.162	-0.815582	0.000458608	0.0432189		-	-	-	-	-
LGI2	ENSG00000153012	protein_coding	leucine-rich repeat LGI family, member 2		608.678	0.823295	0.000465539	0.0436632		rs759243	4	-0.894365	0.0032738	0.748098
TNFRSF11A	ENSG00000141655	protein_coding	tumor necrosis factor receptor superfamily, member 11a, NFKB activator		808.53	0.755283	0.000472872	0.043755		kgp6627669	18	-0.639684	0.009144	0.836767
CADM1	ENSG00000182985	protein_coding	cell adhesion molecule 1		269.143	0.745135	0.000473183	0.043755		rs1607260	11	-1.16961	2.27725e-05	0.12436
ENTPD5	ENSG00000187097	protein_coding	ectonucleoside triphosphate diphosphohydrolase 5		437.766	-0.438169	0.000468753	0.043755		kgp2542124	14	0.137684	0.00841048	0.830451
BNIP3L	ENSG00000104765	protein_coding	BCL2/adenovirus E1B 19kDa interacting protein 3-like		2625.9	0.352364	0.000477009	0.0439026		rs6557957	8	0.199979	0.000769673	0.568839
LAX1	ENSG00000122188	protein_coding	lymphocyte transmembrane adaptor 1		100.127	-0.692182	0.000480992	0.0440633		rs10900541	1	-0.408608	0.000244564	0.408978
PPAPDC1A	ENSG00000203805	protein_coding	phosphatidic acid phosphatase type 2 domain containing 1A		7.02746	0.829711	0.000485251	0.04421		-	-	-	-	-
C1orf21	ENSG00000116667	protein_coding	chromosome 1 open reading frame 21		915.923	0.595564	0.000490089	0.04421		rs10158710	1	0.414937	0.000277569	0.430067
STAMBPL1	ENSG00000138134	protein_coding	STAM binding protein-like 1		65.7596	-0.66892	0.00050055	0.04421		rs1935581	10	0.307179	0.0013839	0.648163
PNMA3	ENSG00000183837	protein_coding	paraneoplastic Ma antigen 3		15.0216	-0.676913	0.000497466	0.04421		-	-	-	-	-
KIF5C	ENSG00000168280	protein_coding	kinesin family member 5C		30.3384	-0.698772	0.000494441	0.04421		-	-	-	-	-
SLC4A4	ENSG00000080493	protein_coding	solute carrier family 4 (sodium bicarbonate cotransporter), member 4		7.47486	-0.791461	0.000487173	0.04421		-	-	-	-	-
COL4A3	ENSG00000169031	protein_coding	collagen, type IV, alpha 3 (Goodpasture antigen)		9.15661	-0.819557	0.000492556	0.04421		-	-	-	-	-
CH25H	ENSG00000138135	protein_coding	cholesterol 25-hydroxylase		32.2792	-0.825966	0.000500526	0.04421		-	-	-	-	-
PTPRF	ENSG00000142949	protein_coding	protein tyrosine phosphatase, receptor type, F		15.8162	-0.696908	0.000507825	0.0446524		-	-	-	-	-
PBK	ENSG00000168078	protein_coding	PDZ binding kinase		22.5026	-0.79248	0.000517782	0.0453255		-	-	-	-	-
TMEM194A	ENSG00000166881	protein_coding	transmembrane protein 194A		1552.18	-0.514512	0.000532948	0.0463019		rs17119494	12	0.261566	0.0174175	0.878563
LINC01146	ENSG00000258867	lincRNA	long intergenic non-protein coding RNA 1146		6.72902	-0.706238	0.000533981	0.0463019		rs17770810	14	0.30261	0.000607853	0.537664
KLF4	ENSG00000136826	protein_coding	Kruppel-like factor 4 (gut)		418.083	-0.753516	0.000535989	0.0463019		rs1009813	9	0.701498	0.00115185	0.62162
CD1B	ENSG00000158485	protein_coding	CD1b molecule		300.289	-0.756331	0.00054129	0.0465557		rs856090	1	-1.14667	0.000795907	0.572969
NEO1	ENSG00000067141	protein_coding	neogenin 1		30.1028	-0.695545	0.000546353	0.0467868		-	-	-	-	-
CPNE7	ENSG00000178773	protein_coding	copine VII		21.7262	-0.719894	0.000549139	0.0468218		kgp4786156	16	0.449505	0.00181723	0.683416
KHDC1	ENSG00000135314	protein_coding	KH homology domain containing 1		4.47329	-0.766928	0.00055718	0.0473026		-	-	-	-	-
AC0938181	ENSG00000225205	antisense			26.8074	0.675306	0.000562156	0.0475203		kgp937120	2	-0.336263	0.00087306	0.587249
RP11-274E72	ENSG00000238000	processed_pseudogene			87.6197	-0.747869	0.00057297	0.0482275		kgp1491751	5	-0.803735	0.0113327	0.850088
C5orf56	ENSG00000197536	protein_coding	chromosome 5 open reading frame 56		421.243	-0.676274	0.000577042	0.0483495		kgp12300141	5	0.62446	0.00152312	0.660153
36769	ENSG00000108387	protein_coding	septin 4		54.5242	-0.815903	0.00057933	0.0483495		-	-	-	-	-
MMP19	ENSG00000123342	protein_coding	matrix metallopeptidase 19		4631.38	0.736456	0.000594505	0.0484078		kgp11393095	12	0.587597	0.0110229	0.849423
PRKD3	ENSG00000115825	protein_coding	protein kinase D3		1228.02	-0.276849	0.000597232	0.0484078		kgp5645748	2	-0.133536	0.00340664	0.75077
SLFN13	ENSG00000154760	protein_coding	schlafen family member 13		142.599	-0.633024	0.000592288	0.0484078		kgp10327610	17	0.527075	0.00109149	0.616329
DAB2IP	ENSG00000136848	protein_coding	DAB2 interacting protein		3.87993	-0.742142	0.00059068	0.0484078		-	-	-	-	-
PLEKHG3	ENSG00000126822	protein_coding	pleckstrin homology domain containing, family G (with RhoGef domain) member 3		553.479	-0.76324	0.000595745	0.0484078		rs1547087	14	-0.76726	0.00166042	0.672301
ENPP1	ENSG00000197594	protein_coding	ectonucleotide pyrophosphatase/phosphodiesterase 1		3.95609	-0.801425	0.00059329	0.0484078		-	-	-	-	-
ADORA2BP1	ENSG00000236136	processed_pseudogene	adenosine A2b receptor pseudogene 1		2.19421	-0.82293	0.000584366	0.0484078		kgp4502352	1	-0.0994644	0.0206742	0.889222
HP	ENSG00000257017	protein_coding	haptoglobin		9.75774	0.796677	0.000606864	0.048712		-	-	-	-	-
ZNF792	ENSG00000180884	protein_coding	zinc finger protein 792		64.0181	-0.417073	0.000604802	0.048712		rs2239511	19	0.151534	0.00212687	0.699999
PLXNA4	ENSG00000221866	protein_coding	plexin A4		29.3135	-0.766561	0.000608405	0.048712		-	-	-	-	-
APOL1	ENSG00000100342	protein_coding	apolipoprotein L, 1		1817.17	-0.72594	0.000614067	0.0489662		rs2267341	22	0.669981	0.00035247	0.461035
HLA-DPB2	ENSG00000224557	transcribed_unprocessed_pseudogene	major histocompatibility complex, class II, DP beta 2 (pseudogene)		7.41422	-0.800173	0.000621488	0.0493581		rs4713711	6	0.272406	0.000456596	0.50186
HORMAD1	ENSG00000143452	protein_coding	HORMA domain containing 1		12.7313	-0.600499	0.000628018	0.0496765		-	-	-	-	-
NFATC2	ENSG00000101096	protein_coding	nuclear factor of activated T-cells, cytoplasmic, calcineurin-dependent 2		418.392	-0.676938	0.00064586	0.0506807		kgp10066543	20	0.472476	0.00132941	0.641709
RP11-588H233	ENSG00000258168	antisense			2.78137	-0.782609	0.000645032	0.0506807		-	-	-	-	-
P3H2	ENSG00000090530	protein_coding	prolyl 3-hydroxylase 2		31.3167	0.776721	0.000653312	0.0508602		-	-	-	-	-
PHLDB2	ENSG00000144824	protein_coding	pleckstrin homology-like domain, family B, member 2		34.5725	-0.690414	0.000653066	0.0508602		-	-	-	-	-
FAM103A1	ENSG00000169612	protein_coding	family with sequence similarity 103, member A1		519.883	0.259175	0.000657736	0.050935		rs1491579	15	-0.114319	0.00504447	0.786498
TMPRSS3	ENSG00000160183	protein_coding	transmembrane protease, serine 3		6.458	-0.796008	0.000659444	0.050935		-	-	-	-	-
DNMT3B	ENSG00000088305	protein_coding	DNA (cytosine-5-)-methyltransferase 3 beta		18.0815	-0.543828	0.000664025	0.0510884		-	-	-	-	-
IGF1	ENSG00000017427	protein_coding	insulin-like growth factor 1 (somatomedin C)		177.637	0.799807	0.000683034	0.0522714		-	-	-	-	-
ARRDC4	ENSG00000140450	protein_coding	arrestin domain containing 4		5046.32	0.474571	0.000694866	0.0522714		kgp9755892	15	-0.326222	0.00100681	0.608787
KIAA1407	ENSG00000163617	protein_coding	KIAA1407		121.459	-0.325273	0.000700996	0.0522714		kgp2713642	3	0.190075	0.00087233	0.587182
ECHDC2	ENSG00000121310	protein_coding	enoyl CoA hydratase domain containing 2		247.41	-0.494954	0.000689038	0.0522714		rs11585570	1	-0.392866	0.000271183	0.425344
SLC4A5	ENSG00000188687	protein_coding	solute carrier family 4 (sodium bicarbonate cotransporter), member 5		23.7961	-0.524524	0.000703286	0.0522714		-	-	-	-	-
VPS9D1	ENSG00000075399	protein_coding	VPS9 domain containing 1		478.897	-0.533351	0.00068933	0.0522714		kgp2117331	16	0.367029	0.00560759	0.79531
TBX21	ENSG00000073861	protein_coding	T-box 21		255.234	-0.694571	0.000694902	0.0522714		rs11657479	17	0.723596	0.00200981	0.692265
CLEC1A	ENSG00000150048	protein_coding	C-type lectin domain family 1, member A		50.711	-0.730981	0.000700359	0.0522714		rs7961483	12	0.367617	0.00100272	0.608248
RP11-111M224	ENSG00000272301	lincRNA			1.52254	-0.774502	0.000700864	0.0522714		kgp10027541	11	-0.239476	0.000905617	0.592454
TPST1	ENSG00000169902	protein_coding	tyrosylprotein sulfotransferase 1		172.091	0.664545	0.000709403	0.0525278		rs7811214	7	-0.449344	0.00365218	0.758464
IKZF3	ENSG00000161405	protein_coding	IKAROS family zinc finger 3 (Aiolos)		741.229	-0.691181	0.000720988	0.0531857		kgp2077335	17	0.615806	0.000570991	0.530675
RP11-1080G151	ENSG00000253557	lincRNA			18.4151	0.77904	0.000732362	0.053623		kgp3383370	8	0.520265	0.00193266	0.689636
BATF3	ENSG00000123685	protein_coding	basic leucine zipper transcription factor, ATF-like 3		45.5348	-0.775023	0.000731197	0.053623		kgp6568156	1	0.671248	0.000286843	0.434382
AC00913312	ENSG00000238045	antisense			31.2038	-0.599307	0.000742367	0.0539545		kgp8427631	16	-0.286114	0.00127518	0.636444
ZBED9	ENSG00000232040	protein_coding	zinc finger, BED-type containing 9		1.5755	-0.795147	0.000740358	0.0539545		-	-	-	-	-
KIAA0319	ENSG00000137261	protein_coding	KIAA0319		15.4962	0.771593	0.000747264	0.0539788		-	-	-	-	-
CMTM3	ENSG00000140931	protein_coding	CKLF-like MARVEL transmembrane domain containing 3		1898.72	0.258708	0.000752355	0.0539788		kgp3313765	16	-0.183502	0.000787205	0.571689
GRIPAP1	ENSG00000068400	protein_coding	GRIP1 associated protein 1		1368.36	-0.274518	0.000757105	0.0539788		-	-	-	-	-
IGF2BP3	ENSG00000136231	protein_coding	insulin-like growth factor 2 mRNA binding protein 3		184.621	-0.648136	0.000754705	0.0539788		rs7811699	7	-0.664124	4.98289e-05	0.192781
CYP4F35P	ENSG00000265787	lincRNA	cytochrome P450, family 4, subfamily F, polypeptide 35, pseudogene		2.88983	-0.761221	0.00075845	0.0539788		kgp10860550	18	0.0810627	0.00100951	0.609245
KCNS1	ENSG00000124134	protein_coding	potassium voltage-gated channel, modifier subfamily S, member 1		1.44086	-0.775524	0.000759145	0.0539788		-	-	-	-	-
TSPAN5	ENSG00000168785	protein_coding	tetraspanin 5		48.2244	-0.687381	0.00076192	0.0539812		-	-	-	-	-
RP11-465B223	ENSG00000217801	transcribed_unprocessed_pseudogene			67.8181	0.711765	0.00076743	0.0539832		kgp2944849	1	-0.985868	0.00206569	0.696358
RP11-693N92	ENSG00000235505	transcribed_unprocessed_pseudogene			48.7139	-0.736511	0.000765005	0.0539832		kgp4789013	11	-0.477536	0.00564145	0.796001
CDC34	ENSG00000099804	protein_coding	cell division cycle 34		432.691	0.264092	0.000774539	0.0542894		kgp7267934	19	0.226835	0.00103163	0.612391
DYRK1B	ENSG00000105204	protein_coding	dual-specificity tyrosine-(Y)-phosphorylation regulated kinase 1B		109.127	0.365728	0.000785047	0.0544447		rs892034	19	0.220055	0.000671877	0.550245
PYHIN1	ENSG00000163564	protein_coding	pyrin and HIN domain family, member 1		83.4171	-0.630262	0.000784851	0.0544447		rs2027469	1	0.452317	0.00358627	0.756169
AC1040241	ENSG00000230709	lincRNA			2.60682	-0.795009	0.000782684	0.0544447		-	-	-	-	-
RASL11A	ENSG00000122035	protein_coding	RAS-like, family 11, member A		233.058	0.744934	0.000789069	0.0545114		rs12874529	13	0.839008	0.00514459	0.787782
ID1	ENSG00000125968	protein_coding	inhibitor of DNA binding 1, dominant negative helix-loop-helix protein		25.4412	0.729206	0.000794279	0.0545114		rs6119879	20	-0.526629	0.000947866	0.599357
RP5-1125A117	ENSG00000276073	lincRNA			12.6683	-0.509286	0.000794313	0.0545114		-	-	-	-	-
FOXP3	ENSG00000049768	protein_coding	forkhead box P3		60.1918	-0.72846	0.00079906	0.0546469		-	-	-	-	-
CCL17	ENSG00000102970	protein_coding	chemokine (C-C motif) ligand 17		20.1255	-0.762207	0.000802453	0.054689		rs3785326	16	0.778318	0.00045939	0.503145
DNAJB9	ENSG00000128590	protein_coding	DnaJ (Hsp40) homolog, subfamily B, member 9		792.344	0.479684	0.000811448	0.0551113		rs10277164	7	0.414111	0.00128997	0.637944
OSGIN1	ENSG00000140961	protein_coding	oxidative stress induced growth inhibitor 1		1425.05	0.575134	0.000829391	0.0555635		rs3743667	16	0.769395	8.47588e-06	0.0664212
ASCC3	ENSG00000112249	protein_coding	activating signal cointegrator 1 complex subunit 3		1457.81	-0.353893	0.000822022	0.0555635		rs9389752	6	0.191783	0.000413436	0.484166
DOPEY1	ENSG00000083097	protein_coding	dopey family member 1		532.932	-0.524353	0.000827122	0.0555635		rs624076	6	0.233566	0.0107705	0.848599
KIR2DL1	ENSG00000125498	protein_coding	killer cell immunoglobulin-like receptor, two domains, long cytoplasmic tail, 1		9.20421	-0.781237	0.000826454	0.0555635		-	-	-	-	-
GSDMA	ENSG00000167914	protein_coding	gasdermin A		196.511	0.795631	0.000837082	0.0556241		rs3859192	17	-1.40995	4.28068e-07	0.00743391
FSIP1	ENSG00000150667	protein_coding	fibrous sheath interacting protein 1		4.79578	-0.68835	0.000838768	0.0556241		-	-	-	-	-
CD40LG	ENSG00000102245	protein_coding	CD40 ligand		51.1406	-0.737214	0.00083327	0.0556241		-	-	-	-	-
ABCA9	ENSG00000154258	protein_coding	ATP-binding cassette, sub-family A (ABC1), member 9		7.63108	-0.719675	0.000842226	0.0556661		-	-	-	-	-
SQSTM1	ENSG00000161011	protein_coding	sequestosome 1		21887.4	0.406932	0.000849507	0.0559595		kgp11843013	5	0.25756	0.000261965	0.419064
FKBP11	ENSG00000134285	protein_coding	FK506 binding protein 11, 19 kDa		134.763	-0.436636	0.000853502	0.0560353		rs2276454	12	-0.233402	0.00422378	0.772341
SERPIND1	ENSG00000099937	protein_coding	serpin peptidase inhibitor, clade D (heparin cofactor), member 1		2.79601	0.796365	0.000873092	0.0566878		-	-	-	-	-
AK7	ENSG00000140057	protein_coding	adenylate kinase 7		2.19877	0.779039	0.000873769	0.0566878		-	-	-	-	-
LTC4S	ENSG00000213316	protein_coding	leukotriene C4 synthase		11.2473	0.763263	0.000869293	0.0566878		-	-	-	-	-
RP11-206L103	ENSG00000235373	lincRNA			288.655	-0.608066	0.000874955	0.0566878		rs2465136	1	0.289027	0.00999839	0.843457
LDLRAD3	ENSG00000179241	protein_coding	low density lipoprotein receptor class A domain containing 3		248.272	0.645213	0.000889367	0.0567412		rs4756270	11	-0.372294	0.00258816	0.72507
TRAF5	ENSG00000082512	protein_coding	TNF receptor-associated factor 5		410.259	-0.510542	0.000879336	0.0567412		kgp1942001	1	-0.431151	0.00864335	0.832829
KIR3DL1	ENSG00000167633	protein_coding	killer cell immunoglobulin-like receptor, three domains, long cytoplasmic tail, 1		14.1045	-0.746228	0.000890182	0.0567412		-	-	-	-	-
ZBED2	ENSG00000177494	protein_coding	zinc finger, BED-type containing 2		156.266	-0.787217	0.000888083	0.0567412		rs9816238	3	-0.671708	0.0015031	0.659277
IL31RA	ENSG00000164509	protein_coding	interleukin 31 receptor A		75.341	-0.788142	0.000884155	0.0567412		-	-	-	-	-
SMARCA1	ENSG00000102038	protein_coding	SWI/SNF related, matrix associated, actin dependent regulator of chromatin, subfamily a, member 1		13.8399	0.700926	0.000896824	0.0569091		-	-	-	-	-
MAGI1	ENSG00000151276	protein_coding	membrane associated guanylate kinase, WW and PDZ domain containing 1		2.1128	-0.78243	0.000898595	0.0569091		-	-	-	-	-
SYNE2	ENSG00000054654	protein_coding	spectrin repeat containing, nuclear envelope 2		1125.67	-0.672005	0.00090165	0.0569196		rs1547087	14	-0.552292	0.000591628	0.534857
RORA	ENSG00000069667	protein_coding	RAR-related orphan receptor A		383.497	-0.602777	0.000907001	0.0570744		kgp1375098	15	0.466766	0.000254966	0.415824
LARP6	ENSG00000166173	protein_coding	La ribonucleoprotein domain family, member 6		1.75701	0.772791	0.00091883	0.0572699		-	-	-	-	-
RASSF2	ENSG00000101265	protein_coding	Ras association (RalGDS/AF-6) domain family member 2		4942.11	0.422698	0.000914594	0.0572699		kgp772624	20	-0.303895	0.00055347	0.526704
HOXB4	ENSG00000182742	protein_coding	homeobox B4		10.4918	-0.725535	0.000918118	0.0572699		-	-	-	-	-
PHEX	ENSG00000102174	protein_coding	phosphate regulating endopeptidase homolog, X-linked		10.9611	-0.699541	0.000931712	0.0577075		-	-	-	-	-
VPS9D1-AS1	ENSG00000261373	antisense	VPS9D1 antisense RNA 1		5.93272	-0.719879	0.000930877	0.0577075		kgp3051504	16	-0.117107	0.0119587	0.853965
CXCL11	ENSG00000169248	protein_coding	chemokine (C-X-C motif) ligand 11		989.821	-0.785212	0.000941433	0.0581268		kgp5393470	4	1.35219	0.00278514	0.732463
MNDA	ENSG00000163563	protein_coding	myeloid cell nuclear differentiation antigen		2127.38	-0.487152	0.000951096	0.0585399		kgp12407575	1	-0.318065	0.00936829	0.837957
CTLA4	ENSG00000163599	protein_coding	cytotoxic T-lymphocyte-associated protein 4		75.2136	-0.774626	0.000959776	0.0588902		rs12617227	2	0.446643	0.00713356	0.817504
NEURL1	ENSG00000107954	protein_coding	neuralized E3 ubiquitin protein ligase 1		9.89195	-0.629883	0.000973704	0.0595592		-	-	-	-	-
TRANK1	ENSG00000168016	protein_coding	tetratricopeptide repeat and ankyrin repeat containing 1		1070.22	-0.604389	0.000977519	0.0596075		rs7616895	3	0.458943	0.000394934	0.47819
PPP1R16B	ENSG00000101445	protein_coding	protein phosphatase 1, regulatory subunit 16B		729.503	-0.668366	0.000982706	0.0597388		kgp1564755	20	0.652321	0.00362415	0.757692
GPBAR1	ENSG00000179921	protein_coding	G protein-coupled bile acid receptor 1		108.106	-0.732644	0.00100039	0.0606266		rs16858298	2	0.581311	0.0115545	0.851373
HELB	ENSG00000127311	protein_coding	helicase (DNA) B		343.844	-0.5901	0.00101354	0.0608619		rs11175936	12	0.291249	0.00688126	0.814296
GYPE	ENSG00000197465	protein_coding	glycophorin E (MNS blood group)		4.72068	-0.667225	0.00100838	0.0608619		-	-	-	-	-
STAC	ENSG00000144681	protein_coding	SH3 and cysteine rich domain		47.2402	-0.771605	0.0010117	0.0608619		-	-	-	-	-
EGFL7	ENSG00000172889	protein_coding	EGF-like-domain, multiple 7		65.0236	0.696152	0.0010203	0.0609383		rs1332793	9	-0.70549	4.41344e-05	0.180058
RNF213	ENSG00000173821	protein_coding	ring finger protein 213		18706.1	-0.613409	0.001021	0.0609383		kgp10083723	17	-0.548424	0.00837103	0.830011
NT5E	ENSG00000135318	protein_coding	5'-nucleotidase, ecto (CD73)		78.5173	0.709917	0.00102511	0.0609989		kgp3459506	6	0.484671	0.000699529	0.554644
PSME2P2	ENSG00000225131	processed_pseudogene	proteasome activator subunit 2 pseudogene 2		81.5836	-0.688807	0.00103391	0.061337		rs9595960	13	-0.550716	0.0325735	0.910787
SPATA9	ENSG00000145757	protein_coding	spermatogenesis associated 9		2.93152	-0.779632	0.00103785	0.0613859		-	-	-	-	-
MMP1	ENSG00000196611	protein_coding	matrix metallopeptidase 1 (interstitial collagenase)		118.006	0.781118	0.00104361	0.0615415		kgp3824865	11	1.09858	3.25623e-06	0.0350782
GPR137C	ENSG00000180998	protein_coding	G protein-coupled receptor 137C		16.8689	0.728765	0.00105107	0.0615833		-	-	-	-	-
RASAL1	ENSG00000111344	protein_coding	RAS protein activator like 1 (GAP1 like)		170.622	0.631281	0.00105058	0.0615833		rs518497	12	0.688719	0.00759971	0.822157
TRIM46	ENSG00000163462	protein_coding	tripartite motif containing 46		10.2607	-0.656685	0.00105369	0.0615833		-	-	-	-	-
HAPLN4	ENSG00000187664	protein_coding	hyaluronan and proteoglycan link protein 4		5.73928	0.782257	0.00106242	0.0619097		-	-	-	-	-
CCNI2	ENSG00000205089	protein_coding	cyclin I family, member 2		5.00257	-0.713473	0.00107225	0.0622981		-	-	-	-	-
ID2	ENSG00000115738	protein_coding	inhibitor of DNA binding 2, dominant negative helix-loop-helix protein		3200.79	0.565098	0.00110643	0.0637199		rs1532791	2	-0.369596	0.000828021	0.578258
TBCCD1	ENSG00000113838	protein_coding	TBCC domain containing 1		288.088	0.238303	0.00110451	0.0637199		kgp12409544	3	0.102614	0.00378427	0.76227
KIAA1324	ENSG00000116299	protein_coding	KIAA1324		36.3437	-0.630779	0.00110214	0.0637199		-	-	-	-	-
TAP1	ENSG00000168394	protein_coding	transporter 1, ATP-binding cassette, sub-family B (MDR/TAP)		7921.72	-0.657837	0.00111049	0.0637675		rs13192471	6	0.6604	0.00287043	0.736531
ABCB1	ENSG00000085563	protein_coding	ATP-binding cassette, sub-family B (MDR/TAP), member 1		141.738	-0.570982	0.00111767	0.0639934		rs10252643	7	-0.329974	0.0156613	0.872579
MAMLD1	ENSG00000013619	protein_coding	mastermind-like domain containing 1		294.795	0.688153	0.00112612	0.06429		-	-	-	-	-
FMN1	ENSG00000248905	protein_coding	formin 1		1372.16	-0.345143	0.00113379	0.0642945		kgp7059115	15	-0.274666	0.000981733	0.605146
SP140	ENSG00000079263	protein_coding	SP140 nuclear body protein		312.018	-0.648911	0.00113599	0.0642945		kgp1701178	2	-0.436406	0.00787254	0.824338
CLUHP3	ENSG00000131797	transcribed_unprocessed_pseudogene	clustered mitochondria (cluA/CLU1) homolog pseudogene 3		105.366	-0.656582	0.00113477	0.0642945		kgp5702816	16	-0.420294	0.0233201	0.895322
DLG3	ENSG00000082458	protein_coding	discs, large homolog 3 (Drosophila)		34.9509	-0.70402	0.00116019	0.0651027		-	-	-	-	-
CDC20	ENSG00000117399	protein_coding	cell division cycle 20		76.5567	-0.725667	0.00116019	0.0651027		rs6882	1	-0.729561	8.09607e-05	0.25164
CTD-2154I112	ENSG00000250240	antisense			2.2955	-0.748771	0.00115657	0.0651027		kgp2694907	5	-0.155991	0.00330564	0.748535
TMEM229B	ENSG00000198133	protein_coding	transmembrane protein 229B		230.789	-0.653714	0.00116994	0.065278		kgp2019191	14	0.487467	0.0157126	0.872812
STAT1	ENSG00000115415	protein_coding	signal transducer and activator of transcription 1, 91kDa		31025.7	-0.72068	0.00116779	0.065278		rs6434514	2	0.827223	0.00317868	0.744379
MYLK2	ENSG00000101306	protein_coding	myosin light chain kinase 2		3.84473	0.768378	0.00118013	0.0653036		-	-	-	-	-
TECPR2	ENSG00000196663	protein_coding	tectonin beta-propeller repeat containing 2		354.803	0.235436	0.00118035	0.0653036		kgp6850427	14	0.262725	0.000156421	0.342519
CTD-2554C211	ENSG00000267422	transcribed_processed_pseudogene			3.36134	-0.668313	0.00117715	0.0653036		kgp22780657	19	0.159174	0.002979	0.739765
STX16-NPEPL1	ENSG00000254995	protein_coding	STX16-NPEPL1 readthrough (NMD candidate)		43.0661	-0.586666	0.00118628	0.0654481		rs11696458	20	-0.534713	0.000317787	0.447299
TRIM69	ENSG00000185880	protein_coding	tripartite motif containing 69		1678.56	-0.564112	0.00119356	0.0656657		rs1288097	15	-0.853145	0.00776527	0.823225
KCNQ5	ENSG00000185760	protein_coding	potassium channel, voltage gated KQT-like subfamily Q, member 5		21.0227	-0.670289	0.00120133	0.0659094		-	-	-	-	-
PTX3	ENSG00000163661	protein_coding	pentraxin 3, long		1513.94	0.736998	0.00120728	0.0660518		kgp2642592	3	-1.07445	0.000796324	0.572969
TCF3P1	ENSG00000236567	processed_pseudogene	transcription factor 3 pseudogene 1		9.49796	-0.720828	0.00122633	0.0669078		rs377186	9	-0.179555	0.0031323	0.743584
ARMC9	ENSG00000135931	protein_coding	armadillo repeat containing 9		611.142	0.659005	0.00123929	0.0674285		kgp1701178	2	0.603903	0.00783075	0.823717
CDC37L1	ENSG00000106993	protein_coding	cell division cycle 37-like 1		356.608	0.377125	0.0012603	0.0676612		rs4237162	9	0.23636	0.00465203	0.780007
PAK4	ENSG00000130669	protein_coding	p21 protein (Cdc42/Rac)-activated kinase 4		188.529	0.317415	0.00126449	0.0676612		rs11083522	19	-0.213785	0.000563944	0.5295
MAF1	ENSG00000179632	protein_coding	MAF1 homolog (S. cerevisiae)		1412.87	0.181344	0.00126728	0.0676612		kgp11009780	8	0.102682	0.00592471	0.801361
CHTF8	ENSG00000168802	protein_coding	CTF8, chromosome transmission fidelity factor 8 homolog (S. cerevisiae)		2219.24	0.150174	0.00127449	0.0676612		kgp2444590	16	-0.119227	0.00667164	0.81217
NPR2	ENSG00000159899	protein_coding	natriuretic peptide receptor 2		6.41362	-0.655371	0.00126261	0.0676612		-	-	-	-	-
GVINP1	ENSG00000254838	transcribed_unprocessed_pseudogene	GTPase, very large interferon inducible pseudogene 1		990.024	-0.669968	0.00125588	0.0676612		rs1041872	11	-0.862981	0.00343009	0.752142
KLKB1	ENSG00000164344	protein_coding	kallikrein B, plasma (Fletcher factor) 1		3.88703	-0.719054	0.00126874	0.0676612		-	-	-	-	-
ZNF876P	ENSG00000198155	transcribed_unprocessed_pseudogene	zinc finger protein 876, pseudogene		2.26061	-0.750951	0.00125729	0.0676612		rs6815946	4	-0.0645154	0.0133323	0.861469
SLC52A1	ENSG00000132517	protein_coding	solute carrier family 52 (riboflavin transporter), member 1		2.25244	-0.756771	0.00127212	0.0676612		-	-	-	-	-
RP11-652L84	ENSG00000280008	TEC			45.5628	-0.603216	0.00127836	0.0676842		-	-	-	-	-
PI3	ENSG00000124102	protein_coding	peptidase inhibitor 3, skin-derived		3.11218	0.762461	0.00128798	0.0677267		-	-	-	-	-
CTD-2020K171	ENSG00000267121	antisense			736.4	-0.427083	0.00129108	0.0677267		rs3760379	17	-0.243175	0.00404556	0.767904
HLA-L	ENSG00000243753	transcribed_unprocessed_pseudogene	major histocompatibility complex, class I, L (pseudogene)		142.271	-0.665388	0.00129291	0.0677267		rs7752959	6	0.565952	0.0069453	0.81497
HSH2D	ENSG00000196684	protein_coding	hematopoietic SH2 domain containing		186.968	-0.697127	0.00128415	0.0677267		rs10410515	19	0.474432	0.00375916	0.761378
DAPK3	ENSG00000167657	protein_coding	death-associated protein kinase 3		414.042	0.282038	0.00129838	0.0678324		kgp12388868	19	0.17711	0.000831744	0.579736
P2RX5	ENSG00000083454	protein_coding	purinergic receptor P2X, ligand gated ion channel, 5		73.2032	-0.70549	0.00131113	0.0683177		kgp778406	17	0.481244	0.00430537	0.773592
MFI2	ENSG00000163975	protein_coding	antigen p97 (melanoma associated) identified by monoclonal antibodies 133.2 and 96.5		381.35	0.707752	0.00131574	0.0683767		kgp6554616	3	-0.766102	0.00498313	0.785569
PDE2A	ENSG00000186642	protein_coding	phosphodiesterase 2A, cGMP-stimulated		81.8515	0.753345	0.00133408	0.0691473		rs672660	11	-0.504979	0.014729	0.868345
FCAMR	ENSG00000162897	protein_coding	Fc receptor, IgA, IgM, high affinity		40.0654	0.740411	0.00134214	0.0692011		-	-	-	-	-
CD40	ENSG00000101017	protein_coding	CD40 molecule, TNF receptor superfamily member 5		3071.51	-0.608856	0.00134028	0.0692011		rs745307	20	0.491039	0.00187792	0.686825
LDB2	ENSG00000169744	protein_coding	LIM domain binding 2		2.23025	-0.728438	0.00135245	0.0695503		-	-	-	-	-
CCDC81	ENSG00000149201	protein_coding	coiled-coil domain containing 81		3.43383	-0.675929	0.00136175	0.0696648		-	-	-	-	-
IFNG	ENSG00000111537	protein_coding	interferon, gamma		56.0489	-0.746994	0.00135983	0.0696648		-	-	-	-	-
AKAP9	ENSG00000127914	protein_coding	A kinase (PRKA) anchor protein 9		1232.15	-0.32616	0.0013725	0.0698075		rs12704649	7	-0.157872	0.00936041	0.837904
INPP5D	ENSG00000168918	protein_coding	inositol polyphosphate-5-phosphatase, 145kDa		2149.89	-0.375702	0.00137225	0.0698075		rs7598771	2	0.350722	0.00179327	0.681848
AICDA	ENSG00000111732	protein_coding	activation-induced cytidine deaminase		10.1691	-0.64296	0.00137517	0.0698075		-	-	-	-	-
C6orf132	ENSG00000188112	protein_coding	chromosome 6 open reading frame 132		10.9134	0.660147	0.00139704	0.0707353		-	-	-	-	-
PTPLA	ENSG00000165996	protein_coding	protein tyrosine phosphatase-like (proline instead of catalytic arginine), member A		22.0577	0.623666	0.00141349	0.0710208		rs7094368	10	0.352248	0.00223622	0.706722
TRIM16	ENSG00000221926	protein_coding	tripartite motif containing 16		211.67	0.518643	0.00140656	0.0710208		kgp6067115	17	0.375102	0.00103212	0.612391
CTSC	ENSG00000109861	protein_coding	cathepsin C		9678.18	-0.582497	0.00141099	0.0710208		kgp11983611	11	0.62913	8.53173e-05	0.257818
PRKAR2B	ENSG00000005249	protein_coding	protein kinase, cAMP-dependent, regulatory, type II, beta		255.858	-0.604377	0.00142645	0.0714895		kgp2612900	7	-0.331892	0.000345876	0.459293
KANK1	ENSG00000107104	protein_coding	KN motif and ankyrin repeat domains 1		8784.44	0.659694	0.00143925	0.0719478		kgp10647816	9	1.02078	0.000580753	0.532912
PKIB	ENSG00000135549	protein_coding	protein kinase (cAMP-dependent, catalytic) inhibitor beta		64.8726	0.747807	0.00144827	0.0722157		rs9401572	6	-0.880504	0.0015238	0.660153
MSH5	ENSG00000204410	protein_coding	mutS homolog 5		84.3561	-0.359437	0.00145836	0.0723952		kgp12044535	6	0.247303	0.00276824	0.731736
KIF17	ENSG00000117245	protein_coding	kinesin family member 17		34.5185	-0.67501	0.00145922	0.0723952		rs584367	1	0.331908	0.00139476	0.64932
HLA-DOA	ENSG00000204252	protein_coding	major histocompatibility complex, class II, DO alpha		1250.52	-0.749614	0.00146503	0.0725004		rs210120	6	1.12803	0.000260835	0.418369
NMRK1	ENSG00000106733	protein_coding	nicotinamide riboside kinase 1		244.616	-0.423276	0.00148079	0.0729143		rs10869496	9	-0.378907	1.25932e-08	0.000463071
RASGRF2	ENSG00000113319	protein_coding	Ras protein-specific guanine nucleotide-releasing factor 2		69.4395	-0.65174	0.00147803	0.0729143		-	-	-	-	-
ALOX12P2	ENSG00000262943	transcribed_unprocessed_pseudogene	arachidonate 12-lipoxygenase pseudogene 2		1.32737	-0.755137	0.00148573	0.0729752		-	-	-	-	-
ZDHHC2	ENSG00000104219	protein_coding	zinc finger, DHHC-type containing 2		864.724	0.373266	0.00149488	0.0729809		kgp6001386	8	0.205107	0.000665523	0.548235
DCUN1D4	ENSG00000109184	protein_coding	DCN1, defective in cullin neddylation 1, domain containing 4		415.243	0.373254	0.0014897	0.0729809		rs11732165	4	-0.175262	0.0252493	0.898737
IPCEF1	ENSG00000074706	protein_coding	interaction protein for cytohesin exchange factors 1		120.545	-0.622292	0.00149967	0.0729809		kgp9279542	6	0.40577	0.00129965	0.63884
CLEC6A	ENSG00000205846	protein_coding	C-type lectin domain family 6, member A		114.19	-0.749284	0.00150067	0.0729809		rs7978532	12	-0.653267	0.00280764	0.733191
IL2	ENSG00000109471	protein_coding	interleukin 2		2.78674	-0.751495	0.00150995	0.0732513		-	-	-	-	-
RP11-42I101	ENSG00000260086	lincRNA			8.96603	0.62229	0.00155204	0.074017		rs8052686	16	-0.286208	0.00122233	0.629879
CLIP2	ENSG00000106665	protein_coding	CAP-GLY domain containing linker protein 2		1180.96	0.548958	0.00154009	0.074017		kgp11754429	7	-0.369821	0.00357366	0.75548
SLC39A4	ENSG00000147804	protein_coding	solute carrier family 39 (zinc transporter), member 4		80.7982	0.436214	0.00154526	0.074017		kgp3927475	8	-0.37951	0.00205625	0.695273
BBX	ENSG00000114439	protein_coding	bobby sox homolog (Drosophila)		875.953	-0.342432	0.00154951	0.074017		rs13093976	3	0.1959	0.00119571	0.626958
HIAT1	ENSG00000156875	protein_coding	hippocampus abundant transcript 1		2093.15	-0.414002	0.00154838	0.074017		kgp2539425	1	0.249399	0.0149748	0.869008
HELLPAR	ENSG00000281344	macro_lncRNA	HELLP associated long non-coding RNA		15.0932	-0.554976	0.00153518	0.074017		-	-	-	-	-
RP11-690P144	ENSG00000269920	protein_coding	Uncharacterized protein {ECO:0000313|Ensembl:ENSP00000473319}		2.95448	-0.721278	0.00153615	0.074017		-	-	-	-	-
CACNA2D3	ENSG00000157445	protein_coding	calcium channel, voltage-dependent, alpha 2/delta subunit 3		17.8805	0.710693	0.00157555	0.0749568		-	-	-	-	-
IL10RB-AS1	ENSG00000223799	antisense	IL10RB antisense RNA 1 (head to head)		140.621	0.456896	0.00160078	0.0757313		rs9978569	21	0.153424	0.0144482	0.86743
NFAM1	ENSG00000235568	protein_coding	NFAT activating protein with ITAM motif 1		2798.31	-0.377941	0.00159626	0.0757313		rs5996274	22	-0.361636	9.38966e-05	0.270895
USP30-AS1	ENSG00000256262	antisense	USP30 antisense RNA 1		54.4717	-0.7062	0.00160337	0.0757313		kgp4451519	12	0.520699	0.00588628	0.800334
PDK4	ENSG00000004799	protein_coding	pyruvate dehydrogenase kinase, isozyme 4		21.6059	0.731086	0.00162401	0.0762961		-	-	-	-	-
CCL20	ENSG00000115009	protein_coding	chemokine (C-C motif) ligand 20		2216.7	0.726515	0.00163889	0.0762961		rs7570716	2	1.05027	0.00219252	0.704582
RP11-355O111	ENSG00000261094	sense_overlapping			31.7472	-0.367449	0.00163669	0.0762961		kgp10640210	9	0.165429	0.00306002	0.742373
SIGLEC6	ENSG00000105492	protein_coding	sialic acid binding Ig-like lectin 6		6.43865	-0.693613	0.00162991	0.0762961		-	-	-	-	-
BSPRY	ENSG00000119411	protein_coding	B-box and SPRY domain containing		8.67573	-0.705772	0.00164207	0.0762961		-	-	-	-	-
RP1-102E246	ENSG00000256913	processed_pseudogene			2.7937	-0.743291	0.00164244	0.0762961		-	-	-	-	-
RP11-476D101	ENSG00000260943	lincRNA			8.19696	-0.745229	0.00162511	0.0762961		-	-	-	-	-
DYNLL1	ENSG00000088986	protein_coding	dynein, light chain, LC8-type 1		2603.9	0.267493	0.0016731	0.0766528		rs812512	12	0.142466	0.00207455	0.696508
CLASP1	ENSG00000074054	protein_coding	cytoplasmic linker associated protein 1		925.654	-0.201039	0.00167287	0.0766528		rs1467326	2	0.245265	0.000234638	0.403564
RP11-480A161	ENSG00000260261	lincRNA			29.0576	-0.538091	0.00166085	0.0766528		kgp12026109	3	-0.116906	0.00450454	0.776588
RP5-1092A34	ENSG00000270605	antisense			18.0796	-0.557646	0.00165601	0.0766528		kgp8413599	1	-0.15221	0.00846343	0.830719
SCG3	ENSG00000104112	protein_coding	secretogranin III		14.5141	-0.705231	0.00167736	0.0766528		-	-	-	-	-
CCR8	ENSG00000179934	protein_coding	chemokine (C-C motif) receptor 8		8.95675	-0.726483	0.00167009	0.0766528		-	-	-	-	-
C1S	ENSG00000182326	protein_coding	complement component 1, s subcomponent		452.405	-0.74937	0.00167713	0.0766528		rs216905	12	1.45587	0.00177514	0.67986
CD69	ENSG00000110848	protein_coding	CD69 molecule		213.812	-0.701792	0.00170699	0.0778261		rs17729741	12	-0.613803	0.00610223	0.803906
ESR1	ENSG00000091831	protein_coding	estrogen receptor 1		91.514	-0.512515	0.00171384	0.0779581		rs2982712	6	0.211334	0.00227944	0.708637
HPCAL1	ENSG00000115756	protein_coding	hippocalcin-like 1		2274.69	0.462395	0.00173582	0.0785948		rs10198045	2	0.278384	0.00232385	0.710326
GPR171	ENSG00000174946	protein_coding	G protein-coupled receptor 171		86.3909	-0.651036	0.00173351	0.0785948		rs11914988	3	0.526694	0.0011021	0.617449
NUB1	ENSG00000013374	protein_coding	negative regulator of ubiquitin-like proteins 1		2643.12	-0.578932	0.00176002	0.0795078		kgp1526094	7	-0.634168	0.000208728	0.386748
TYRO3	ENSG00000092445	protein_coding	TYRO3 protein tyrosine kinase		28.9262	0.546327	0.00179159	0.0807273		-	-	-	-	-
DDX60	ENSG00000137628	protein_coding	DEAD (Asp-Glu-Ala-Asp) box polypeptide 60		1437.78	-0.614331	0.00179522	0.0807273		rs902003	4	-0.340657	0.0203287	0.888328
SYNPO	ENSG00000171992	protein_coding	synaptopodin		58.9306	-0.701387	0.00181086	0.0812453		-	-	-	-	-
ZNF254	ENSG00000213096	protein_coding	zinc finger protein 254		198.242	-0.287969	0.00182985	0.0813559		kgp3513899	19	-0.185394	0.00309369	0.743584
ZNF101	ENSG00000181896	protein_coding	zinc finger protein 101		419.001	-0.435458	0.00182799	0.0813559		rs10419226	19	-0.199474	0.00739762	0.819514
KLRK1	ENSG00000213809	protein_coding	killer cell lectin-like receptor subfamily K, member 1		183.741	-0.626063	0.00181938	0.0813559		rs2417750	12	0.375861	0.0219849	0.892832
GBP3	ENSG00000117226	protein_coding	guanylate binding protein 3		1705.6	-0.659753	0.00182685	0.0813559		kgp11688585	1	0.838684	0.000503742	0.515121
LINC00657	ENSG00000260032	lincRNA	long intergenic non-protein coding RNA 657		8129.88	0.282078	0.00183957	0.0813656		rs6060891	20	-0.200976	0.0117169	0.852802
ITGA10	ENSG00000143127	protein_coding	integrin, alpha 10		14.7943	-0.504343	0.00184246	0.0813656		-	-	-	-	-
RP11-620J154	ENSG00000273805	antisense			3.40665	-0.730217	0.00184246	0.0813656		-	-	-	-	-
AGTR1	ENSG00000144891	protein_coding	angiotensin II receptor, type 1		10.5114	0.743179	0.00185126	0.0814769		-	-	-	-	-
C5orf63	ENSG00000164241	protein_coding	chromosome 5 open reading frame 63		32.008	-0.590914	0.00185325	0.0814769		kgp12282510	5	-0.201899	0.0026052	0.725831
FAM107A	ENSG00000168309	protein_coding	family with sequence similarity 107, member A		1.90812	-0.682397	0.00186266	0.0817083		-	-	-	-	-
ASAH2	ENSG00000188611	protein_coding	N-acylsphingosine amidohydrolase (non-lysosomal ceramidase) 2		11.6765	-0.606654	0.00191385	0.0837669		-	-	-	-	-
FAM78B	ENSG00000188859	protein_coding	family with sequence similarity 78, member B		2.1	-0.738896	0.00192052	0.0838727		-	-	-	-	-
35673	ENSG00000180096	protein_coding	septin 1		270.757	-0.610276	0.00193063	0.0841276		kgp4527802	16	-0.57055	0.00958932	0.840258
ARHGEF35	ENSG00000213214	protein_coding	Rho guanine nucleotide exchange factor (GEF) 35		23.2237	-0.66551	0.00193879	0.0842969		-	-	-	-	-
PLOD2	ENSG00000152952	protein_coding	procollagen-lysine, 2-oxoglutarate 5-dioxygenase 2		44.5251	0.682767	0.00196801	0.0853786		-	-	-	-	-
DEPTOR	ENSG00000155792	protein_coding	DEP domain containing MTOR-interacting protein		24.0442	0.636336	0.00200818	0.0867393		-	-	-	-	-
FAM13A	ENSG00000138640	protein_coding	family with sequence similarity 13, member A		116.084	0.613816	0.00200731	0.0867393		kgp9835091	4	-0.510431	0.00338812	0.750647
LRBA	ENSG00000198589	protein_coding	LPS-responsive vesicle trafficking, beach and anchor containing		888.042	-0.295599	0.00202366	0.0872165		rs6535830	4	0.156184	0.00450208	0.776466
SEMA4D	ENSG00000187764	protein_coding	sema domain, immunoglobulin domain (Ig), transmembrane domain (TM) and short cytoplasmic domain, (semaphorin) 4D		1621.51	-0.587525	0.00203161	0.0873682		kgp2903251	9	-0.819513	0.000122103	0.306439
RP11-472N133	ENSG00000237797	lincRNA			5.21849	0.670324	0.00204997	0.0875838		rs2778668	10	0.306826	0.00893766	0.83499
UBA7	ENSG00000182179	protein_coding	ubiquitin-like modifier activating enzyme 7		1196.65	-0.382544	0.00204765	0.0875838		kgp8833950	3	0.206202	0.012764	0.858573
SLC12A3	ENSG00000070915	protein_coding	solute carrier family 12 (sodium/chloride transporter), member 3		3.95385	-0.717248	0.00204261	0.0875838		-	-	-	-	-
ERCC6L	ENSG00000186871	protein_coding	excision repair cross-complementation group 6-like		20.7653	-0.674071	0.00205871	0.0877672		-	-	-	-	-
TCAF2	ENSG00000170379	protein_coding	TRPM8 channel-associated factor 2		203.862	-0.56634	0.00207002	0.0879961		kgp5218095	7	-0.272268	0.00744954	0.820643
UBXN10	ENSG00000162543	protein_coding	UBX domain protein 10		3.68868	-0.692686	0.00207459	0.0879961		-	-	-	-	-
GBP4	ENSG00000162654	protein_coding	guanylate binding protein 4		5354.53	-0.715632	0.00207749	0.0879961		rs2816850	1	-1.16956	0.00243902	0.716649
SRXN1	ENSG00000271303	protein_coding	sulfiredoxin 1		8947.46	0.469376	0.00209799	0.0886739		kgp6681921	20	-0.281662	0.000749139	0.564734
TTC7B	ENSG00000165914	protein_coding	tetratricopeptide repeat domain 7B		534.137	-0.359001	0.0021027	0.0886826		rs11620623	14	-0.305778	0.00132633	0.641292
TRPV4	ENSG00000111199	protein_coding	transient receptor potential cation channel, subfamily V, member 4		269.519	-0.596613	0.00211	0.0887681		rs882355	12	0.546877	0.00303539	0.741657
HCG27	ENSG00000206344	protein_coding	HLA complex group 27 (non-protein coding)		31.648	-0.617876	0.00211374	0.0887681		rs2516513	6	0.34971	0.00502815	0.786376
CTC-524C52	ENSG00000263272	antisense			4.75546	0.655973	0.00215603	0.0889436		rs9908838	17	-0.113051	1.63208e-06	0.0207542
LGALS3	ENSG00000131981	protein_coding	lectin, galactoside-binding, soluble, 3		9831.93	0.471305	0.00213891	0.0889436		kgp8712879	14	0.368406	0.00567038	0.796185
SH3GL1	ENSG00000141985	protein_coding	SH3-domain GRB2-like 1		1248.89	0.373307	0.00217211	0.0889436		rs8102566	19	-0.407814	0.000215426	0.392322
ZNF628	ENSG00000197483	protein_coding	zinc finger protein 628		54.2528	0.329692	0.00212797	0.0889436		rs4806471	19	-0.381138	0.000392568	0.477815
RPS17	ENSG00000182774	protein_coding	ribosomal protein S17		5115.13	0.28682	0.00213901	0.0889436		kgp9200378	15	-0.241862	0.00460654	0.779367
IP6K1	ENSG00000176095	protein_coding	inositol hexakisphosphate kinase 1		1061.67	0.269139	0.00217124	0.0889436		-	-	-	-	-
MIER2	ENSG00000105556	protein_coding	mesoderm induction early response 1, family member 2		374.429	0.261563	0.00217024	0.0889436		kgp2091377	19	-0.25474	3.01047e-05	0.143851
KIAA1279	ENSG00000198954	protein_coding	KIAA1279		643.345	0.209214	0.00213058	0.0889436		rs2394505	10	-0.203214	5.33034e-05	0.199295
FAM157C	ENSG00000260528	lincRNA	family with sequence similarity 157, member C		103.834	-0.537625	0.00215064	0.0889436		kgp6470397	16	0.374135	0.0281891	0.904757
SRD5A3-AS1	ENSG00000249700	processed_transcript	SRD5A3 antisense RNA 1		6.09043	-0.618633	0.00217003	0.0889436		kgp1550371	4	0.181397	0.00293156	0.73793
LINC00299	ENSG00000236790	lincRNA	long intergenic non-protein coding RNA 299		4.04996	-0.63471	0.00215646	0.0889436		rs181133	2	0.123629	0.00385998	0.763992
CCL1	ENSG00000108702	protein_coding	chemokine (C-C motif) ligand 1		131.482	-0.714107	0.00216264	0.0889436		rs1123025	17	-0.825355	0.00155955	0.664024
AC0030921	ENSG00000236453	lincRNA			8.9975	0.724312	0.00222599	0.0890391		kgp8885000	7	0.545425	0.0143209	0.86684
NCK2	ENSG00000071051	protein_coding	NCK adaptor protein 2		693.359	0.503799	0.00220492	0.0890391		kgp8024795	2	-0.303773	0.0028735	0.736531
TPRA1	ENSG00000163870	protein_coding	transmembrane protein, adipocyte asscociated 1		1989.66	0.440825	0.00222351	0.0890391		rs9864772	3	-0.208126	0.00218164	0.70357
DDAH2	ENSG00000213722	protein_coding	dimethylarginine dimethylaminohydrolase 2		557.999	0.378008	0.0022111	0.0890391		kgp6523930	6	0.29683	0.00051004	0.517485
LAMTOR4	ENSG00000188186	protein_coding	late endosomal/lysosomal adaptor, MAPK and MTOR activator 4		775.437	0.238596	0.00220799	0.0890391		rs11977827	7	0.20584	0.00302563	0.74106
UBR1	ENSG00000159459	protein_coding	ubiquitin protein ligase E3 component n-recognin 1		909.623	-0.315306	0.00221894	0.0890391		kgp2563234	15	-0.216175	0.00269096	0.728542
ZNF486	ENSG00000256229	protein_coding	zinc finger protein 486		64.7432	-0.431396	0.00222869	0.0890391		kgp8037893	19	0.270836	0.00266467	0.727597
MVB12B	ENSG00000196814	protein_coding	multivesicular body subunit 12B		136.175	-0.532361	0.00220431	0.0890391		rs10987215	9	-0.429765	0.000154956	0.3405
RP1-244F241	ENSG00000271857	antisense			6.86791	-0.604317	0.00218036	0.0890391		kgp10533617	6	0.192059	0.00521248	0.789093
ACTR3C	ENSG00000106526	protein_coding	ARP3 actin-related protein 3 homolog C (yeast)		21.1601	-0.663171	0.00219886	0.0890391		-	-	-	-	-
WNT16	ENSG00000002745	protein_coding	wingless-type MMTV integration site family, member 16		1.80184	-0.728917	0.00220863	0.0890391		-	-	-	-	-
MYO7B	ENSG00000169994	protein_coding	myosin VIIB		6.7887	-0.730375	0.00220052	0.0890391		-	-	-	-	-
TNK2-AS1	ENSG00000224614	antisense	TNK2 antisense RNA 1		12.8262	-0.605316	0.00224289	0.0894249		rs823009	3	0.183631	0.000185536	0.37008
ARAP2	ENSG00000047365	protein_coding	ArfGAP with RhoGAP domain, ankyrin repeat and PH domain 2		1232.72	-0.37346	0.00224819	0.0894551		rs6857376	4	-0.25029	0.00186167	0.686095
RP11-426C225	ENSG00000260517	lincRNA			8.05264	0.655558	0.00225288	0.0894612		rs13338835	16	-0.254814	0.0296093	0.907176
TPPP	ENSG00000171368	protein_coding	tubulin polymerization promoting protein		16.8248	0.615344	0.00229061	0.089828		-	-	-	-	-
FAH	ENSG00000103876	protein_coding	fumarylacetoacetate hydrolase (fumarylacetoacetase)		586.024	0.333703	0.00226853	0.089828		rs7178017	15	-0.27156	0.000823859	0.577216
PRPF4	ENSG00000136875	protein_coding	pre-mRNA processing factor 4		755.548	0.204747	0.00230294	0.089828		rs584190	9	0.189267	0.00025825	0.417089
C4orf29	ENSG00000164074	protein_coding	chromosome 4 open reading frame 29		253.989	-0.208672	0.00227739	0.089828		kgp11474955	4	-0.181973	0.00793055	0.825262
CXCR3	ENSG00000186810	protein_coding	chemokine (C-X-C motif) receptor 3		97.9722	-0.649763	0.00229866	0.089828		-	-	-	-	-
IL26	ENSG00000111536	protein_coding	interleukin 26		1.79079	-0.679703	0.00229709	0.089828		-	-	-	-	-
RP11-705C155	ENSG00000272917	processed_transcript			3.41574	-0.708625	0.00230317	0.089828		rs11046589	12	-0.258517	0.00102336	0.611668
CPNE6	ENSG00000100884	protein_coding	copine VI (neuronal)		20.2048	-0.726088	0.00228608	0.089828		-	-	-	-	-
TRAV5	ENSG00000211779	TR_V_gene	T cell receptor alpha variable 5		1.55632	-0.726758	0.00227529	0.089828		rs226998	14	0.300745	0.00133648	0.642528
CA9	ENSG00000107159	protein_coding	carbonic anhydrase IX		1.53069	-0.594366	0.00231594	0.0899698		-	-	-	-	-
C1QB	ENSG00000173369	protein_coding	complement component 1, q subcomponent, B chain		6540.79	-0.718959	0.00231172	0.0899698		kgp12511337	1	-1.08104	0.00270958	0.729257
PPP4R4	ENSG00000119698	protein_coding	protein phosphatase 4, regulatory subunit 4		17.697	0.702996	0.0023363	0.0902431		-	-	-	-	-
REEP2	ENSG00000132563	protein_coding	receptor accessory protein 2		5.95284	-0.652201	0.00233672	0.0902431		-	-	-	-	-
LAMA3	ENSG00000053747	protein_coding	laminin, alpha 3		61.172	-0.668216	0.0023323	0.0902431		-	-	-	-	-
PPP4C	ENSG00000149923	protein_coding	protein phosphatase 4, catalytic subunit		1523.2	0.184687	0.0023488	0.0903555		kgp6327176	16	-0.0914322	0.0124714	0.856705
LINC00173	ENSG00000196668	processed_transcript	long intergenic non-protein coding RNA 173		7.90683	-0.658812	0.00234739	0.0903555		kgp8427084	12	-0.468812	0.00419854	0.771728
TPD52L2	ENSG00000101150	protein_coding	tumor protein D52-like 2		4659.7	0.3609	0.00235522	0.0904256		kgp6006974	20	0.185419	0.00184832	0.684885
HAPLN3	ENSG00000140511	protein_coding	hyaluronan and proteoglycan link protein 3		742.429	-0.695497	0.00236224	0.0905189		rs11638513	15	1.35152	0.00221999	0.706189
ANKH	ENSG00000154122	protein_coding	ANKH inorganic pyrophosphate transport regulator		3745.19	0.55522	0.00236933	0.090614		rs7720476	5	-0.438685	0.00193657	0.689971
TRO	ENSG00000067445	protein_coding	trophinin		3.94147	-0.634598	0.00238835	0.0911646		-	-	-	-	-
RP11-1228E121	ENSG00000280279	lincRNA			132.022	-0.495125	0.00241384	0.0919594		-	-	-	-	-
LCN2	ENSG00000148346	protein_coding	lipocalin 2		19.9098	0.681199	0.00242316	0.0921361		-	-	-	-	-
DPYSL3	ENSG00000113657	protein_coding	dihydropyrimidinase-like 3		234.124	0.695079	0.00244616	0.0924751		rs3910815	5	0.69904	0.00771675	0.822759
SPEF2	ENSG00000152582	protein_coding	sperm flagellar 2		48.3958	-0.395594	0.00244404	0.0924751		kgp1601950	5	0.265839	0.00181691	0.683339
CXCL13	ENSG00000156234	protein_coding	chemokine (C-X-C motif) ligand 13		17.8184	-0.721362	0.00244143	0.0924751		-	-	-	-	-
GREM1	ENSG00000166923	protein_coding	gremlin 1, DAN family BMP antagonist		2898.76	0.700526	0.00245747	0.0927248		rs16960151	15	-1.14948	0.000562846	0.529342
MED22	ENSG00000148297	protein_coding	mediator complex subunit 22		647.603	0.239359	0.00246753	0.0929263		kgp9310703	9	0.162839	0.00344859	0.753023
LRRK2	ENSG00000188906	protein_coding	leucine-rich repeat kinase 2		1843.67	-0.684017	0.00250395	0.0941179		kgp8813963	12	0.769757	0.000622589	0.540002
GPC1	ENSG00000063660	protein_coding	glypican 1		43.9813	0.520254	0.00251104	0.0942048		-	-	-	-	-
ACSM5	ENSG00000183549	protein_coding	acyl-CoA synthetase medium-chain family member 5		11.8567	-0.551091	0.00252345	0.0944903		-	-	-	-	-
REPS2	ENSG00000169891	protein_coding	RALBP1 associated Eps domain containing 2		140.513	0.546834	0.00253667	0.0947669		-	-	-	-	-
NR6A1	ENSG00000148200	protein_coding	nuclear receptor subfamily 6, group A, member 1		61.9201	0.506743	0.00254204	0.0947669		-	-	-	-	-
BTN3A1	ENSG00000026950	protein_coding	butyrophilin, subfamily 3, member A1		1220.2	-0.545359	0.00254527	0.0947669		kgp11444978	6	0.545297	0.000128748	0.313069
BTN3A3	ENSG00000111801	protein_coding	butyrophilin, subfamily 3, member A3		900.559	-0.582907	0.00255327	0.0947866		kgp11444978	6	0.542088	0.000519705	0.520299
FST	ENSG00000134363	protein_coding	follistatin		19.1411	-0.665699	0.00255543	0.0947866		-	-	-	-	-
RP1-313L43	ENSG00000232194	antisense			4.75833	0.718271	0.00257544	0.0949922		kgp22768357	1	0.513149	0.000479005	0.50872
RIN3	ENSG00000100599	protein_coding	Ras and Rab interactor 3		1936.31	0.400231	0.00256922	0.0949922		rs12884739	14	0.286026	0.000311427	0.443323
ITGAL	ENSG00000005844	protein_coding	integrin, alpha L (antigen CD11A (p180), lymphocyte function-associated antigen 1; alpha polypeptide)		3123.67	-0.540803	0.00257125	0.0949922		kgp2518502	16	-0.378146	0.010643	0.847837
C1R	ENSG00000159403	protein_coding	complement component 1, r subcomponent		178.421	-0.714046	0.00258899	0.0953136		kgp1064516	12	1.58534	0.000325775	0.450931
SLAMF9	ENSG00000162723	protein_coding	SLAM family member 9		140.391	0.704251	0.00259658	0.0953355		kgp5024740	1	-1.52476	0.000653317	0.545119
ZNF501	ENSG00000186446	protein_coding	zinc finger protein 501		53.8662	-0.4888	0.00260815	0.0953355		rs9839994	3	-0.266995	0.00123205	0.630491
QPCT	ENSG00000115828	protein_coding	glutaminyl-peptide cyclotransferase		1373.55	-0.577746	0.00260895	0.0953355		rs13407899	2	0.830823	0.000428233	0.491675
ALDH1A1	ENSG00000165092	protein_coding	aldehyde dehydrogenase 1 family, member A1		867.15	-0.636211	0.00260855	0.0953355		kgp3537496	9	-0.566089	0.00553523	0.794309
CD109	ENSG00000156535	protein_coding	CD109 molecule		5357.09	0.596759	0.00261419	0.09535		kgp2131465	6	0.871036	0.00253413	0.722981
TMEM184B	ENSG00000198792	protein_coding	transmembrane protein 184B		750.889	0.307003	0.00263822	0.0960162		kgp12154501	22	0.218641	0.00112018	0.619634
ZFP37	ENSG00000136866	protein_coding	ZFP37 zinc finger protein		14.5612	-0.607543	0.0026422	0.0960162		-	-	-	-	-
RP11-75L12	ENSG00000213443	processed_pseudogene			64.3939	-0.536578	0.00265431	0.0962547		kgp11772128	12	0.309115	0.00145215	0.655476
FAM72B	ENSG00000188610	protein_coding	family with sequence similarity 72, member B		53.1396	-0.576852	0.00265854	0.0962547		kgp3709736	1	-0.31847	0.000553657	0.526704
PPL	ENSG00000118898	protein_coding	periplakin		3.08009	0.713324	0.00267098	0.0962712		-	-	-	-	-
CTSV	ENSG00000136943	protein_coding	cathepsin V		20.6213	0.652229	0.00267183	0.0962712		-	-	-	-	-
TXNRD1	ENSG00000198431	protein_coding	thioredoxin reductase 1		16176	0.461149	0.00268836	0.0962712		kgp10848582	12	-0.364852	0.0022106	0.705415
BLOC1S4	ENSG00000186222	protein_coding	biogenesis of lysosomal organelles complex-1, subunit 4, cappuccino		164.327	0.24475	0.00270787	0.0962712		rs10022359	4	0.284274	0.000603491	0.536677
CERS6	ENSG00000172292	protein_coding	ceramide synthase 6		1876.49	-0.337618	0.00268424	0.0962712		kgp690488	2	-0.168452	0.000782322	0.57087
PSME2	ENSG00000100911	protein_coding	proteasome (prosome, macropain) activator subunit 2 (PA28 beta)		5135.04	-0.60085	0.00269482	0.0962712		kgp8463469	14	0.753544	0.00927768	0.837397
TGFBR3	ENSG00000069702	protein_coding	transforming growth factor, beta receptor III		83.6869	-0.602945	0.0027038	0.0962712		rs284176	1	-0.244421	0.00832646	0.829562
EXTL3-AS1	ENSG00000246339	antisense	EXTL3 antisense RNA 1		2.98554	-0.636309	0.00270707	0.0962712		rs10110940	8	0.153343	4.66227e-05	0.186289
RP11-119B162	ENSG00000229539	antisense			1.92434	-0.686495	0.00269496	0.0962712		kgp10006020	20	0.298205	0.000119133	0.302744
RPS3AP43	ENSG00000242661	processed_pseudogene	ribosomal protein S3a pseudogene 43		2.09443	-0.68956	0.0026951	0.0962712		rs12815011	12	0.240706	0.00114156	0.620878
C4orf32	ENSG00000174749	protein_coding	chromosome 4 open reading frame 32		311.387	-0.474106	0.00271849	0.0964744		kgp2020322	4	0.183359	0.00319064	0.74476
PHLPP1	ENSG00000081913	protein_coding	PH domain and leucine rich repeat protein phosphatase 1		418.211	0.341987	0.00273846	0.0968344		rs611027	18	0.244558	0.000147816	0.33334
GRIP2	ENSG00000144596	protein_coding	glutamate receptor interacting protein 2		6.92836	-0.713549	0.00273663	0.0968344		-	-	-	-	-
ATP8B1	ENSG00000081923	protein_coding	ATPase, aminophospholipid transporter, class I, type 8B, member 1		198.462	0.610527	0.00275658	0.0973003		rs2288774	18	0.332556	0.00545889	0.792899
PTPN21	ENSG00000070778	protein_coding	protein tyrosine phosphatase, non-receptor type 21		20.5557	0.518278	0.00278067	0.0973058		-	-	-	-	-
MXI1	ENSG00000119950	protein_coding	MAX interactor 1, dimerization protein		273.449	0.445102	0.00278216	0.0973058		rs12573817	10	0.397022	0.000209223	0.386831
GRN	ENSG00000030582	protein_coding	granulin		27863	0.307543	0.00277523	0.0973058		kgp10108935	17	-0.252244	0.0116328	0.852214
INTS9	ENSG00000104299	protein_coding	integrator complex subunit 9		447.917	0.184169	0.0027809	0.0973058		kgp11058764	8	0.131633	0.00863537	0.832797
GLUL	ENSG00000135821	protein_coding	glutamate-ammonia ligase		24970.7	-0.549528	0.00279085	0.0973058		kgp6129015	1	0.42582	0.00488468	0.784165
CD96	ENSG00000153283	protein_coding	CD96 molecule		393.101	-0.582575	0.00276687	0.0973058		rs754914	3	0.647443	0.000382227	0.47507
PLEKHG7	ENSG00000187510	protein_coding	pleckstrin homology domain containing, family G (with RhoGef domain) member 7		1.77383	-0.714877	0.00279132	0.0973058		-	-	-	-	-
CBX6	ENSG00000183741	protein_coding	chromobox homolog 6		1748.63	-0.474341	0.00280502	0.0974385		kgp7172913	22	0.371171	0.00131799	0.640691
OSBPL10	ENSG00000144645	protein_coding	oxysterol binding protein-like 10		31.1849	-0.632971	0.00280213	0.0974385		-	-	-	-	-
GPR97	ENSG00000182885	protein_coding	G protein-coupled receptor 97		44.8722	-0.658515	0.00281097	0.0974733		-	-	-	-	-
CLGN	ENSG00000153132	protein_coding	calmegin		4.6286	0.682531	0.00286585	0.0975542		-	-	-	-	-
RGS13	ENSG00000127074	protein_coding	regulator of G-protein signaling 13		8.99574	0.673031	0.00282282	0.0975542		-	-	-	-	-
MET	ENSG00000105976	protein_coding	MET proto-oncogene, receptor tyrosine kinase		296.542	0.647688	0.00285889	0.0975542		rs10808181	7	0.713103	0.0022522	0.707589
AZU1	ENSG00000172232	protein_coding	azurocidin 1		20.0113	0.596742	0.00284153	0.0975542		rs11666805	19	0.564873	0.000560967	0.528651
TMEM222	ENSG00000186501	protein_coding	transmembrane protein 222		514.305	0.292638	0.00287436	0.0975542		kgp11224829	1	0.156183	0.00508472	0.786776
CD97	ENSG00000123146	protein_coding	CD97 molecule		3994.74	-0.337327	0.00288228	0.0975542		kgp22827066	19	0.373825	0.00294798	0.739093
MYBL1	ENSG00000185697	protein_coding	v-myb avian myeloblastosis viral oncogene homolog-like 1		45.192	-0.567797	0.00288586	0.0975542		-	-	-	-	-
PVRIG	ENSG00000213413	protein_coding	poliovirus receptor related immunoglobulin domain containing		70.4187	-0.595665	0.0028876	0.0975542		rs5015755	7	-0.415777	0.0197975	0.886682
HCP5	ENSG00000206337	sense_overlapping	HLA complex P5 (non-protein coding)		1260.71	-0.605444	0.0028573	0.0975542		rs2857595	6	-0.531676	0.00312132	0.743584
CD2	ENSG00000116824	protein_coding	CD2 molecule		511.876	-0.617332	0.00288127	0.0975542		rs624988	1	0.491061	0.00467951	0.780434
LINC00176	ENSG00000196421	lincRNA	long intergenic non-protein coding RNA 176		6.4993	-0.670372	0.00287919	0.0975542		rs816933	20	0.112765	0.000310154	0.443259
VAMP5	ENSG00000168899	protein_coding	vesicle-associated membrane protein 5		785.801	-0.69454	0.00284439	0.0975542		rs10514646	2	1.39752	0.00448835	0.776423
TRAV8-3	ENSG00000211787	TR_V_gene	T cell receptor alpha variable 8-3		1.70707	-0.70381	0.00284715	0.0975542		kgp847358	14	0.331579	0.000712447	0.557542
TMEM139	ENSG00000178826	protein_coding	transmembrane protein 139		1.57574	-0.706098	0.00283694	0.0975542		-	-	-	-	-
AIM2	ENSG00000163568	protein_coding	absent in melanoma 2		209.542	-0.709165	0.00283417	0.0975542		kgp7474461	1	0.918756	0.00291039	0.737178
LOXL2	ENSG00000134013	protein_coding	lysyl oxidase-like 2		9.61308	-0.554211	0.00290075	0.0976634		-	-	-	-	-
RP11-383F61	ENSG00000229677	processed_pseudogene			13.8663	-0.64729	0.00290053	0.0976634		kgp4526404	7	0.562609	0.000191127	0.373603
LMNB1	ENSG00000113368	protein_coding	lamin B1		630.054	-0.605366	0.0029136	0.0979287		rs11241892	5	0.442236	0.00983033	0.842288
MND1	ENSG00000121211	protein_coding	meiotic nuclear divisions 1 homolog (S. cerevisiae)		9.86726	-0.651652	0.00292538	0.0981571		-	-	-	-	-
DZIP3	ENSG00000198919	protein_coding	DAZ interacting zinc finger protein 3		243.375	-0.260993	0.00293053	0.0981586		rs1975569	3	0.12772	0.000660772	0.547156
FAM169A	ENSG00000198780	protein_coding	family with sequence similarity 169, member A		42.5573	-0.588521	0.00294912	0.0981586		-	-	-	-	-
ITK	ENSG00000113263	protein_coding	IL2-inducible T-cell kinase		483.368	-0.58971	0.00294861	0.0981586		kgp5829189	5	-0.541037	0.00157918	0.66485
MTND4P14	ENSG00000236254	unprocessed_pseudogene	MT-ND4 pseudogene 14		6.65438	-0.682461	0.00294527	0.0981586		rs377186	9	-0.218747	0.000192839	0.374784
IL12RB2	ENSG00000081985	protein_coding	interleukin 12 receptor, beta 2		91.1833	-0.683924	0.00295034	0.0981586		rs11587907	1	0.882176	0.00376315	0.761618
IDO2	ENSG00000188676	protein_coding	indoleamine 2,3-dioxygenase 2		47.423	-0.704918	0.0029741	0.0987824		-	-	-	-	-
AC0251711	ENSG00000215068	antisense			45.5806	-0.52223	0.00298472	0.0988315		kgp7853428	5	-0.266893	0.017437	0.878652
IL3RA	ENSG00000185291	protein_coding	interleukin 3 receptor, alpha (low affinity)		329.327	-0.677315	0.00298562	0.0988315		-	-	-	-	-
LMCD1	ENSG00000071282	protein_coding	LIM and cysteine-rich domains 1		9.77987	-0.691143	0.00300274	0.0991507		-	-	-	-	-
FAM26F	ENSG00000188820	protein_coding	family with sequence similarity 26, member F		1025.93	-0.706699	0.00300533	0.0991507		rs1741819	6	-1.70778	0.000104905	0.285407
FGL2	ENSG00000127951	protein_coding	fibrinogen-like 2		6860.06	-0.65428	0.0030115	0.0991881		kgp12165764	7	-0.542464	0.00998904	0.843457
SFMBT2	ENSG00000198879	protein_coding	Scm-like with four mbt domains 2		1249.48	-0.428242	0.00302397	0.0993389		kgp2471093	10	-0.30175	7.49624e-05	0.241759
BHLHE40-AS1	ENSG00000235831	antisense	BHLHE40 antisense RNA 1		15.4389	-0.572618	0.0030308	0.0993389		rs6794753	3	0.268053	0.000471273	0.506514
FAM225A	ENSG00000231528	lincRNA	family with sequence similarity 225, member A (non-protein coding)		444.958	-0.648824	0.00303121	0.0993389		rs7852613	9	0.958417	0.000144186	0.329541
CIITA	ENSG00000179583	protein_coding	class II, major histocompatibility complex, transactivator		2726.24	-0.641679	0.00305313	0.0998913		kgp7504677	16	0.738117	0.000638278	0.543172
CTC-448F26	ENSG00000266910	processed_pseudogene			1.40262	0.70412	0.00307031	0.100286		rs10404352	19	-0.0834911	0.0130311	0.860037
PRKCQ	ENSG00000065675	protein_coding	protein kinase C, theta		84.2744	-0.608548	0.003077	0.100339		kgp7145291	10	0.457559	0.00449369	0.776466
SLPI	ENSG00000124107	protein_coding	secretory leukocyte peptidase inhibitor		3.32102	0.697247	0.00308531	0.100444		-	-	-	-	-
FAS	ENSG00000026103	protein_coding	Fas cell surface death receptor		681.393	-0.429177	0.00309553	0.100444		rs7898005	10	-0.233504	0.00787475	0.824375
MYEF2	ENSG00000104177	protein_coding	myelin expression factor 2		59.3134	-0.436615	0.00309313	0.100444		rs1797227	15	0.176312	0.0053078	0.791121
NEDD9	ENSG00000111859	protein_coding	neural precursor cell expressed, developmentally down-regulated 9		424.186	-0.482056	0.0031058	0.100456		rs9380521	6	-0.471189	0.00160871	0.667311
LTK	ENSG00000062524	protein_coding	leukocyte receptor tyrosine kinase		6.46739	-0.601478	0.00311118	0.100456		-	-	-	-	-
GPM6A	ENSG00000150625	protein_coding	glycoprotein M6A		2.32123	-0.704461	0.00310802	0.100456		-	-	-	-	-
IL36G	ENSG00000136688	protein_coding	interleukin 36, gamma		20.4084	0.695841	0.00313472	0.100885		kgp12316069	2	-0.543298	0.00390929	0.764996
OLFM4	ENSG00000102837	protein_coding	olfactomedin 4		15.7057	0.651149	0.00312984	0.100885		-	-	-	-	-
LGALS17A	ENSG00000226025	transcribed_unprocessed_pseudogene	Charcot-Leyden crystal protein pseudogene		31.0361	-0.693295	0.00314182	0.100948		rs10775532	19	0.928543	0.00125305	0.634028
ANXA2R	ENSG00000177721	protein_coding	annexin A2 receptor		61.1118	-0.599987	0.00314851	0.100998		kgp1551210	5	-0.335694	0.00413972	0.770596
CLMP	ENSG00000166250	protein_coding	CXADR-like membrane protein		9.85423	0.6971	0.00315838	0.101054		-	-	-	-	-
TRMT61A	ENSG00000166166	protein_coding	tRNA methyltransferase 61A		332.002	0.413549	0.00316815	0.101054		kgp6912011	14	0.217279	0.00551316	0.793835
CTD-2517M2214	ENSG00000255182	processed_transcript			14.3368	-0.514823	0.00317077	0.101054		kgp6147699	8	-0.225452	0.0229936	0.894669
LINC01132	ENSG00000227630	lincRNA	long intergenic non-protein coding RNA 1132		3.93445	-0.68685	0.00316736	0.101054		-	-	-	-	-
CES4A	ENSG00000172824	protein_coding	carboxylesterase 4A		69.2037	-0.406582	0.00318208	0.101088		kgp7680138	16	-0.239858	9.07099e-05	0.265833
NFATC4	ENSG00000100968	protein_coding	nuclear factor of activated T-cells, cytoplasmic, calcineurin-dependent 4		2.31426	-0.703448	0.00317914	0.101088		-	-	-	-	-
FGD2	ENSG00000146192	protein_coding	FYVE, RhoGEF and PH domain containing 2		895.901	-0.643985	0.00319832	0.101131		rs6938061	6	0.685954	0.00059995	0.53622
ZNF860	ENSG00000197385	protein_coding	zinc finger protein 860		4.80634	-0.681312	0.00319447	0.101131		-	-	-	-	-
DOK7	ENSG00000175920	protein_coding	docking protein 7		2.45772	-0.701491	0.00319884	0.101131		-	-	-	-	-
GPR114	ENSG00000159618	protein_coding	G protein-coupled receptor 114		45.5334	-0.634132	0.00321798	0.101573		-	-	-	-	-
C1RL	ENSG00000139178	protein_coding	complement component 1, r subcomponent-like		288.669	-0.643375	0.00323943	0.102086		kgp1064516	12	1.0397	0.00203674	0.693909
CYP27B1	ENSG00000111012	protein_coding	cytochrome P450, family 27, subfamily B, polypeptide 1		980.904	-0.631187	0.00324981	0.10225		rs1502815	12	-0.622756	0.00755649	0.821821
KLHL31	ENSG00000124743	protein_coding	kelch-like family member 31		5.33844	0.586538	0.00325829	0.102353		-	-	-	-	-
PDXDC2P	ENSG00000196696	processed_transcript	pyridoxal-dependent decarboxylase domain containing 2, pseudogene		302.57	-0.414503	0.00327445	0.102697		kgp11096131	16	0.296154	0.00026135	0.418614
SEMA5A	ENSG00000112902	protein_coding	sema domain, seven thrombospondin repeats (type 1 and type 1-like), transmembrane domain (TM) and short cytoplasmic domain, (semaphorin) 5A		23.9529	0.70088	0.0032855	0.102737		-	-	-	-	-
AL9287683	ENSG00000253701	lincRNA			7.46092	-0.670327	0.00328618	0.102737		rs2056860	14	0.576713	0.0141226	0.866203
SURF6	ENSG00000148296	protein_coding	surfeit 6		565.433	0.385757	0.00329244	0.10277		rs811504	9	0.279962	0.00132766	0.641525
MAPK11	ENSG00000185386	protein_coding	mitogen-activated protein kinase 11		34.5321	-0.520742	0.00330444	0.102982		-	-	-	-	-
RET	ENSG00000165731	protein_coding	ret proto-oncogene		43.4418	0.551711	0.0033129	0.103082		-	-	-	-	-
RPL41	ENSG00000279483	protein_coding	ribosomal protein L41		3027.41	0.218712	0.00332471	0.103137		-	-	-	-	-
GLDC	ENSG00000178445	protein_coding	glycine dehydrogenase (decarboxylating)		8.24421	-0.699285	0.00332514	0.103137		-	-	-	-	-
CA8	ENSG00000178538	protein_coding	carbonic anhydrase VIII		7.59369	0.689158	0.00334541	0.103298		-	-	-	-	-
TADA2B	ENSG00000173011	protein_coding	transcriptional adaptor 2B		705.686	0.21235	0.003345	0.103298		kgp380720	4	-0.232867	0.00498029	0.785569
ATM	ENSG00000149311	protein_coding	ATM serine/threonine kinase		2800.98	-0.313656	0.00334795	0.103298		kgp6670512	11	-0.276593	0.0104805	0.846713
CACNA1A	ENSG00000141837	protein_coding	calcium channel, voltage-dependent, P/Q type, alpha 1A subunit		16.5747	-0.661875	0.0033513	0.103298		-	-	-	-	-
TMSB15B	ENSG00000269226	protein_coding	thymosin beta 15B		6.12132	-0.609169	0.00336107	0.103437		-	-	-	-	-
RABIF	ENSG00000183155	protein_coding	RAB interacting factor		385.241	0.227887	0.00340163	0.104466		kgp5505975	1	0.161438	4.55596e-06	0.0444894
LYRM1	ENSG00000102897	protein_coding	LYR motif containing 1		172.438	-0.3815	0.00340512	0.104466		rs7187470	16	0.301135	0.000589772	0.534843
CLEC2D	ENSG00000069493	protein_coding	C-type lectin domain family 2, member D		622.339	-0.50435	0.00342512	0.104916		rs4883182	12	-0.394002	0.000809631	0.57541
ANKRD20A5P	ENSG00000186481	transcribed_unprocessed_pseudogene	ankyrin repeat domain 20 family, member A5, pseudogene		5.72863	-0.619582	0.00345449	0.105601		kgp11779625	18	-0.173659	0.00602373	0.802722
NOS1	ENSG00000089250	protein_coding	nitric oxide synthase 1 (neuronal)		2.34626	-0.668719	0.00345819	0.105601		-	-	-	-	-
CHMP1A	ENSG00000131165	protein_coding	charged multivesicular body protein 1A		1661.8	0.216577	0.00346832	0.105746		rs3803689	16	-0.127744	0.0087085	0.833583
IGF2	ENSG00000167244	protein_coding	insulin-like growth factor 2		3.87095	0.69731	0.00350774	0.106351		-	-	-	-	-
GCKR	ENSG00000084734	protein_coding	glucokinase (hexokinase 4) regulator		4.25765	0.688377	0.00350882	0.106351		-	-	-	-	-
TLR5	ENSG00000187554	protein_coding	toll-like receptor 5		122.816	0.610152	0.00350977	0.106351		rs4653522	1	-0.636158	0.00534358	0.791316
CLDN23	ENSG00000253958	protein_coding	claudin 23		290.897	-0.508051	0.00350686	0.106351		rs17149208	8	0.731054	5.30714e-05	0.198873
TNFAIP8L3	ENSG00000183578	protein_coding	tumor necrosis factor, alpha-induced protein 8-like 3		273.797	0.657564	0.00355325	0.106561		kgp10267933	15	0.640738	0.00389845	0.764996
PGLYRP1	ENSG00000008438	protein_coding	peptidoglycan recognition protein 1		7.8737	0.64795	0.00352714	0.106561		-	-	-	-	-
DEXI	ENSG00000182108	protein_coding	Dexi homolog (mouse)		308.201	0.540027	0.00358702	0.106561		kgp7504677	16	-0.504729	0.000159523	0.345651
ABHD15	ENSG00000168792	protein_coding	abhydrolase domain containing 15		223.188	-0.269357	0.00355933	0.106561		rs12938678	17	0.186423	0.0190462	0.884651
POLB	ENSG00000070501	protein_coding	polymerase (DNA directed), beta		171.841	-0.404966	0.00354599	0.106561		rs4257991	8	-0.300432	0.0023791	0.713917
LINC01001	ENSG00000230724	lincRNA	long intergenic non-protein coding RNA 1001		428.753	-0.446637	0.00358167	0.106561		kgp4480328	11	0.29274	0.00452356	0.776936
KSR1	ENSG00000141068	protein_coding	kinase suppressor of ras 1		198.269	-0.558103	0.00355346	0.106561		rs940013	17	0.330508	0.0199528	0.88719
TRAC	ENSG00000277734	TR_C_gene	T cell receptor alpha constant		548.653	-0.581736	0.00358507	0.106561		-	-	-	-	-
CCDC141	ENSG00000163492	protein_coding	coiled-coil domain containing 141		10.2184	-0.615969	0.00358488	0.106561		-	-	-	-	-
PLEKHA7	ENSG00000166689	protein_coding	pleckstrin homology domain containing, family A member 7		119.29	-0.626304	0.00357428	0.106561		kgp8805166	11	0.760413	0.000968267	0.602665
RARRES3	ENSG00000133321	protein_coding	retinoic acid receptor responder (tazarotene induced) 3		657.755	-0.681616	0.00357144	0.106561		rs7115616	11	0.754021	0.00901424	0.835576
TRAPPC3L	ENSG00000173626	protein_coding	trafficking protein particle complex 3-like		1.91387	-0.685325	0.00356788	0.106561		-	-	-	-	-
RNF165	ENSG00000141622	protein_coding	ring finger protein 165		2.55338	-0.688823	0.00357643	0.106561		-	-	-	-	-
LINC01136	ENSG00000233791	lincRNA	long intergenic non-protein coding RNA 1136		6.53639	0.692096	0.00362142	0.107115		kgp10111796	1	0.608222	0.000337492	0.455309
CNOT6L	ENSG00000138767	protein_coding	CCR4-NOT transcription complex, subunit 6-like		1160.31	-0.25542	0.00361673	0.107115		rs1806786	4	-0.149303	0.00421247	0.771887
ZNF625	ENSG00000257591	protein_coding	zinc finger protein 625		13.5737	-0.518723	0.00363439	0.107115		-	-	-	-	-
GCNT1	ENSG00000187210	protein_coding	glucosaminyl (N-acetyl) transferase 1, core 2		315.185	-0.541003	0.00363829	0.107115		rs7030848	9	0.477245	0.00171396	0.676647
HLA-DPA1	ENSG00000231389	protein_coding	major histocompatibility complex, class II, DP alpha 1		21127.6	-0.646242	0.00363737	0.107115		kgp10218967	6	0.884945	0.000784969	0.571529
AC00694616	ENSG00000273203	lincRNA			1.65878	-0.673641	0.00362853	0.107115		-	-	-	-	-
SLC37A2	ENSG00000134955	protein_coding	solute carrier family 37 (glucose-6-phosphate transporter), member 2		6265.19	0.537702	0.0036839	0.108134		kgp11664769	11	0.562384	0.000128345	0.312945
PSMB9	ENSG00000240065	protein_coding	proteasome (prosome, macropain) subunit, beta type, 9		1312	-0.616453	0.00367897	0.108134		kgp5605657	6	0.717136	0.000716304	0.558608
NMB	ENSG00000197696	protein_coding	neuromedin B		70.8699	0.604922	0.00370191	0.10834		kgp12128537	15	-0.45371	0.0061376	0.804193
RAB7B	ENSG00000276600	protein_coding	RAB7B, member RAS oncogene family		5009.08	0.515606	0.0037006	0.10834		-	-	-	-	-
PAM	ENSG00000145730	protein_coding	peptidylglycine alpha-amidating monooxygenase		1049.02	0.512799	0.00370787	0.108353		kgp9918881	5	-0.369619	0.00201205	0.692465
TBC1D8	ENSG00000204634	protein_coding	TBC1 domain family, member 8 (with GRAM domain)		868.511	0.534173	0.00377741	0.108613		kgp4781158	2	-0.497015	0.00319673	0.745015
PPIF	ENSG00000108179	protein_coding	peptidylprolyl isomerase F		5376.33	0.481743	0.00374197	0.108613		kgp10944526	10	0.418734	0.000808865	0.57541
CRCP	ENSG00000241258	protein_coding	CGRP receptor component		769.258	0.207564	0.0037826	0.108613		kgp5036933	7	0.116032	0.0295951	0.907123
EMC3	ENSG00000125037	protein_coding	ER membrane protein complex subunit 3		1403.54	0.206125	0.0037579	0.108613		kgp7573658	3	-0.280807	5.06949e-06	0.0474353
TNK2	ENSG00000061938	protein_coding	tyrosine kinase, non-receptor, 2		829.449	-0.397275	0.0037729	0.108613		kgp10549835	3	0.429319	0.002	0.691429
GLCCI1	ENSG00000106415	protein_coding	glucocorticoid induced transcript 1		166.922	-0.423037	0.00377314	0.108613		rs10268598	7	-0.340124	0.00123733	0.631068
SAMD9L	ENSG00000177409	protein_coding	sterile alpha motif domain containing 9-like		5749.2	-0.591228	0.00374071	0.108613		rs180274	7	-0.521781	0.00581399	0.799025
RNF207	ENSG00000158286	protein_coding	ring finger protein 207		26.6232	-0.602382	0.00377555	0.108613		-	-	-	-	-
TTN	ENSG00000155657	protein_coding	titin		63.02	-0.605069	0.00374111	0.108613		-	-	-	-	-
RASSF6	ENSG00000169435	protein_coding	Ras association (RalGDS/AF-6) domain family member 6		4.22133	-0.638446	0.00378291	0.108613		-	-	-	-	-
RP4-756G235	ENSG00000235513	antisense			17.0012	-0.662221	0.00377451	0.108613		rs5751191	22	-0.188694	0.0150642	0.869659
FAM166B	ENSG00000215187	protein_coding	family with sequence similarity 166, member B		1.07605	-0.686015	0.00376177	0.108613		-	-	-	-	-
JAK3	ENSG00000105639	protein_coding	Janus kinase 3		709.732	-0.547979	0.00380716	0.10915		kgp32040	19	0.433253	0.00422992	0.77254
DPM2	ENSG00000136908	protein_coding	dolichyl-phosphate mannosyltransferase polypeptide 2, regulatory subunit		439.648	0.195311	0.00381648	0.109258		rs4734	9	0.198042	0.0107284	0.84822
CASP8	ENSG00000064012	protein_coding	caspase 8, apoptosis-related cysteine peptidase		811.006	-0.37885	0.00383388	0.109481		kgp11316544	2	0.198753	0.00422367	0.772341
GBP1	ENSG00000117228	protein_coding	guanylate binding protein 1, interferon-inducible		23178.8	-0.66584	0.00383541	0.109481		rs2816850	1	-1.2117	0.00155305	0.663241
SCML2	ENSG00000102098	protein_coding	sex comb on midleg-like 2 (Drosophila)		22.9328	0.469781	0.00387695	0.109904		-	-	-	-	-
CLEC11A	ENSG00000105472	protein_coding	C-type lectin domain family 11, member A		508.876	0.455551	0.00386198	0.109904		rs1651543	19	-0.588709	0.000138631	0.324171
C1GALT1	ENSG00000106392	protein_coding	core 1 synthase, glycoprotein-N-acetylgalactosamine 3-beta-galactosyltransferase 1		494.706	-0.313773	0.0038715	0.109904		rs11772534	7	0.255546	0.00425748	0.773083
MAGEE1	ENSG00000198934	protein_coding	melanoma antigen family E, 1		14.4831	-0.533723	0.00387178	0.109904		-	-	-	-	-
MYH10	ENSG00000133026	protein_coding	myosin, heavy chain 10, non-muscle		29.5908	-0.635588	0.00388368	0.109904		-	-	-	-	-
HOXC4	ENSG00000198353	protein_coding	homeobox C4		2.9138	-0.641507	0.00388294	0.109904		-	-	-	-	-
SETBP1	ENSG00000152217	protein_coding	SET binding protein 1		61.5101	-0.616332	0.00389257	0.109997		-	-	-	-	-
IL24	ENSG00000162892	protein_coding	interleukin 24		3.86557	0.688004	0.00394516	0.110208		-	-	-	-	-
SRGAP1	ENSG00000196935	protein_coding	SLIT-ROBO Rho GTPase activating protein 1		309.311	0.547479	0.00396158	0.110208		kgp11203199	12	0.391189	0.00172561	0.677703
FAM168B	ENSG00000152102	protein_coding	family with sequence similarity 168, member B		2624.94	0.295009	0.00395226	0.110208		rs4850246	2	0.176369	0.00365337	0.758576
RP11-332H142	ENSG00000272994	lincRNA			41.2989	-0.34543	0.00393463	0.110208		rs12471907	2	-0.104644	0.00157106	0.664339
FAM72A	ENSG00000196550	protein_coding	family with sequence similarity 72, member A		103.935	-0.535597	0.00392783	0.110208		rs949710	1	-0.289717	0.00338831	0.750647
NT5C3A	ENSG00000122643	protein_coding	5'-nucleotidase, cytosolic IIIA		442.858	-0.551561	0.00393715	0.110208		rs17170255	7	0.683067	0.000708091	0.556212
FAM92A1	ENSG00000188343	protein_coding	family with sequence similarity 92, member A1		78.4462	-0.55808	0.00395628	0.110208		rs4236815	8	-0.443317	0.000351126	0.460923
RP11-402J72	ENSG00000244720	processed_pseudogene			6.78497	-0.597127	0.00394074	0.110208		rs7651713	3	-0.240435	0.00483433	0.783685
GPR55	ENSG00000135898	protein_coding	G protein-coupled receptor 55		23.6673	-0.623171	0.00392142	0.110208		-	-	-	-	-
RP11-404O135	ENSG00000176320	lincRNA			3.18233	-0.676033	0.00395401	0.110208		kgp8478702	1	0.0865041	0.0105936	0.847315
DMC1	ENSG00000100206	protein_coding	DNA meiotic recombinase 1		4.39294	-0.683516	0.00392882	0.110208		-	-	-	-	-
RHOQP2	ENSG00000232742	processed_pseudogene	ras homolog family member Q pseudogene 2		1.99539	0.690098	0.00399977	0.110229		rs4088115	2	0.255754	0.00447256	0.776304
TRIM16L	ENSG00000108448	protein_coding	tripartite motif containing 16-like		66.3593	0.560026	0.00400711	0.110229		kgp3153148	17	0.547174	0.00816336	0.827877
KIAA0232	ENSG00000170871	protein_coding	KIAA0232		1811.84	0.333169	0.00399457	0.110229		kgp271506	4	-0.317097	0.000140629	0.325673
RPL37A	ENSG00000197756	protein_coding	ribosomal protein L37a		5833.55	0.248384	0.00399034	0.110229		rs2542197	2	-0.140807	0.000680736	0.552316
ANP32E	ENSG00000143401	protein_coding	acidic (leucine-rich) nuclear phosphoprotein 32 family, member E		888.079	-0.402446	0.0039703	0.110229		rs11204754	1	-0.213145	0.00246705	0.717633
PPA1	ENSG00000180817	protein_coding	pyrophosphatase (inorganic) 1		790.267	-0.479513	0.00398317	0.110229		kgp787072	10	0.285767	0.0035168	0.754658
EML6	ENSG00000214595	protein_coding	echinoderm microtubule associated protein like 6		15.7617	-0.560316	0.00400545	0.110229		-	-	-	-	-
TP63	ENSG00000073282	protein_coding	tumor protein p63		3.29975	-0.657513	0.00400407	0.110229		-	-	-	-	-
VPS72	ENSG00000163159	protein_coding	vacuolar protein sorting 72 homolog (S. cerevisiae)		412.874	0.167079	0.00405182	0.110994		rs12123975	1	0.128	0.00446058	0.776304
CCDC102B	ENSG00000150636	protein_coding	coiled-coil domain containing 102B		150.018	-0.524733	0.00404698	0.110994		kgp293518	18	0.483118	3.28076e-05	0.151675
NCALD	ENSG00000104490	protein_coding	neurocalcin delta		29.562	-0.624286	0.00404323	0.110994		-	-	-	-	-
SHANK1	ENSG00000161681	protein_coding	SH3 and multiple ankyrin repeat domains 1		42.8506	0.669868	0.00412215	0.111813		-	-	-	-	-
CNRIP1	ENSG00000119865	protein_coding	cannabinoid receptor interacting protein 1		260.303	0.558353	0.00408815	0.111813		rs4854519	2	-0.585519	0.000723102	0.559636
HDAC11	ENSG00000163517	protein_coding	histone deacetylase 11		119.893	0.320205	0.00411747	0.111813		rs4685080	3	-0.30078	0.000326678	0.450931
TMCO4	ENSG00000162542	protein_coding	transmembrane and coiled-coil domains 4		308.338	-0.337743	0.00413282	0.111813		rs1770489	1	0.258725	0.000649529	0.54461
OXNAD1	ENSG00000154814	protein_coding	oxidoreductase NAD-binding domain containing 1		228.813	-0.355979	0.00412341	0.111813		rs9813959	3	-0.339604	0.000383445	0.475162
CD247	ENSG00000198821	protein_coding	CD247 molecule		347.692	-0.567707	0.00412866	0.111813		rs1476075	1	0.591393	0.000589717	0.534843
TRGC1	ENSG00000211689	TR_C_gene	T cell receptor gamma constant 1		51.5652	-0.630392	0.00411098	0.111813		rs6977706	7	-0.380093	0.0010585	0.61442
SHC4	ENSG00000185634	protein_coding	SHC (Src homology 2 domain containing) family, member 4		15.5566	-0.645229	0.00409575	0.111813		-	-	-	-	-
HLF	ENSG00000108924	protein_coding	hepatic leukemia factor		6.89644	-0.647537	0.0041264	0.111813		-	-	-	-	-
GALNT14	ENSG00000158089	protein_coding	polypeptide N-acetylgalactosaminyltransferase 14		58.1281	0.665054	0.00416911	0.1123		kgp11506790	2	0.696989	0.00514409	0.787782
TRPM6	ENSG00000119121	protein_coding	transient receptor potential cation channel, subfamily M, member 6		7.64433	0.657212	0.00416857	0.1123		-	-	-	-	-
HERC1	ENSG00000103657	protein_coding	HECT and RLD domain containing E3 ubiquitin protein ligase family member 1		3700.42	-0.174981	0.00417362	0.1123		kgp10121657	15	-0.286607	0.00135121	0.644537
OR5B21	ENSG00000198283	protein_coding	olfactory receptor, family 5, subfamily B, member 21		5.49771	-0.607137	0.00417303	0.1123		-	-	-	-	-
C8G	ENSG00000176919	protein_coding	complement component 8, gamma polypeptide		9.87203	-0.567599	0.00418131	0.11235		rs7390989	9	-0.279053	0.00246241	0.717284
RP11-457M115	ENSG00000261584	lincRNA			4.15735	-0.63552	0.00418689	0.11235		rs2073526	6	0.096899	0.00144561	0.654802
CREB3	ENSG00000107175	protein_coding	cAMP responsive element binding protein 3		656.512	0.224611	0.0042135	0.11291		kgp983478	9	-0.161452	0.00616862	0.80469
NENF	ENSG00000117691	protein_coding	neudesin neurotrophic factor		649.176	0.316682	0.00424447	0.113586		kgp6568156	1	-0.224212	0.000719055	0.558809
RP11-8L82	ENSG00000259004	lincRNA			6.92857	-0.52422	0.00426247	0.113913		rs2273608	14	0.259324	0.000709801	0.556722
HILPDA	ENSG00000135245	protein_coding	hypoxia inducible lipid droplet-associated		61.4999	0.504367	0.00427269	0.114022		kgp12395495	7	-0.431253	0.0044868	0.776304
RHEBL1	ENSG00000167550	protein_coding	Ras homolog enriched in brain like 1		32.1806	-0.608348	0.00427814	0.114022		kgp4348784	12	-0.343817	0.00995139	0.843081
KRT17P1	ENSG00000131885	transcribed_unprocessed_pseudogene	keratin 17 pseudogene 1		1.50649	0.65933	0.00430148	0.114489		kgp6737531	17	0.29333	0.000437258	0.494959
RP11-157D232	ENSG00000234191	lincRNA			81.0495	0.592661	0.00431559	0.11454		-	-	-	-	-
CELSR3	ENSG00000008300	protein_coding	cadherin, EGF LAG seven-pass G-type receptor 3		44.42	-0.558441	0.00432085	0.11454		-	-	-	-	-
AC0050831	ENSG00000233834	processed_transcript			28.3921	-0.642076	0.00431661	0.11454		kgp2434989	7	0.620237	0.000962544	0.601273
RPS6KA2	ENSG00000071242	protein_coding	ribosomal protein S6 kinase, 90kDa, polypeptide 2		1380.64	0.514153	0.00434289	0.11497		rs7752989	6	0.551154	0.000975198	0.604263
ERICH6-AS1	ENSG00000240137	antisense	ERICH6 antisense RNA 1		2.30572	-0.621215	0.00435297	0.115082		kgp2309866	3	0.325061	0.0023535	0.71165
C3orf70	ENSG00000187068	protein_coding	chromosome 3 open reading frame 70		4.94337	0.671967	0.00439585	0.115287		-	-	-	-	-
PLIN2	ENSG00000147872	protein_coding	perilipin 2		2555.28	0.579772	0.0043795	0.115287		rs1549988	9	0.753017	0.000397211	0.478952
STX2	ENSG00000111450	protein_coding	syntaxin 2		540.596	0.330198	0.0043836	0.115287		kgp9774789	12	0.244816	0.00311647	0.743584
RTN1	ENSG00000139970	protein_coding	reticulon 1		1091.74	-0.49429	0.00439417	0.115287		rs12589340	14	-0.655256	0.000834477	0.57986
RP11-34P1315	ENSG00000268903	processed_pseudogene			210.813	-0.510254	0.00439242	0.115287		kgp3996180	1	0.456015	0.00137667	0.647921
MCAM	ENSG00000076706	protein_coding	melanoma cell adhesion molecule		6.09664	-0.669524	0.00438623	0.115287		-	-	-	-	-
VSIG10	ENSG00000176834	protein_coding	V-set and immunoglobulin domain containing 10		57.3801	0.426624	0.00443844	0.116095		kgp11367431	12	-0.300592	0.00452297	0.776936
RNF121	ENSG00000137522	protein_coding	ring finger protein 121		390.655	0.213187	0.00443712	0.116095		rs1980090	11	-0.176213	0.00105476	0.614089
DNAJC14	ENSG00000135392	protein_coding	DnaJ (Hsp40) homolog, subfamily C, member 14		803.953	0.14852	0.00444545	0.116124		kgp6751407	12	-0.0975057	0.0148719	0.868865
KEAP1	ENSG00000079999	protein_coding	kelch-like ECH-associated protein 1		1747.71	0.249304	0.00446837	0.11653		kgp3127444	19	-0.130902	0.00763271	0.822407
AVIL	ENSG00000135407	protein_coding	advillin		62.6143	-0.506967	0.00447283	0.11653		rs1466383	12	0.267103	0.0289154	0.905745
MZT2B	ENSG00000152082	protein_coding	mitotic spindle organizing protein 2B		509.512	0.304813	0.00449703	0.116819		rs2407074	2	-0.238858	0.000296543	0.43867
EML3	ENSG00000149499	protein_coding	echinoderm microtubule associated protein like 3		989.016	-0.191795	0.00449224	0.116819		kgp12193304	11	0.161986	0.0172471	0.87799
NPR1	ENSG00000169418	protein_coding	natriuretic peptide receptor 1		78.5285	-0.660439	0.00450171	0.116819		-	-	-	-	-
IFNL1	ENSG00000182393	protein_coding	interferon, lambda 1		5.2699	-0.627704	0.00451413	0.116987		-	-	-	-	-
SLC38A5	ENSG00000017483	protein_coding	solute carrier family 38, member 5		55.3388	-0.552464	0.00453705	0.117427		-	-	-	-	-
OLIG2	ENSG00000205927	protein_coding	oligodendrocyte lineage transcription factor 2		12.7667	0.675138	0.00457214	0.117433		-	-	-	-	-
DNM3	ENSG00000197959	protein_coding	dynamin 3		69.4522	0.612567	0.00458402	0.117433		rs12754628	1	-0.362283	0.00253364	0.72292
HPS6	ENSG00000166189	protein_coding	Hermansky-Pudlak syndrome 6		701.308	0.21262	0.00455838	0.117433		kgp5869054	10	-0.14717	0.00625026	0.805313
ZC3HC1	ENSG00000091732	protein_coding	zinc finger, C3HC-type containing 1		300.591	0.205582	0.00456217	0.117433		kgp2423254	7	0.12559	0.0112051	0.849675
CTD-2017F172	ENSG00000274383	antisense			55.8448	-0.462824	0.0045869	0.117433		-	-	-	-	-
INPP5F	ENSG00000198825	protein_coding	inositol polyphosphate-5-phosphatase F		312.318	-0.467385	0.00458264	0.117433		kgp3869453	10	-0.304576	0.00283619	0.735132
GATA3	ENSG00000107485	protein_coding	GATA binding protein 3		104.256	-0.572608	0.00455901	0.117433		kgp11966217	10	0.588078	3.67631e-05	0.161623
CARD11	ENSG00000198286	protein_coding	caspase recruitment domain family, member 11		286.95	-0.589394	0.00459506	0.117433		rs17133152	7	0.52565	0.00491732	0.784264
LINC01358	ENSG00000230812	lincRNA	long intergenic non-protein coding RNA 1358		9.81851	-0.589688	0.00458397	0.117433		rs2806403	1	0.575393	0.00278181	0.732237
RANBP3L	ENSG00000164188	protein_coding	RAN binding protein 3-like		5.84294	-0.672786	0.00459691	0.117433		-	-	-	-	-
37499	ENSG00000125354	protein_coding	septin 6		1359.88	-0.352178	0.00462204	0.117623		-	-	-	-	-
AC1380352	ENSG00000238035	lincRNA			108.707	-0.443325	0.00462227	0.117623		kgp9329359	5	-0.411688	0.00395505	0.765749
LPAL2	ENSG00000213071	transcribed_unprocessed_pseudogene	lipoprotein, Lp(a)-like 2, pseudogene		3.85545	-0.637778	0.0046118	0.117623		rs1247513	6	-0.174897	0.00230313	0.7098
ZAP70	ENSG00000115085	protein_coding	zeta-chain (TCR) associated protein kinase 70kDa		408.332	-0.550191	0.00464076	0.117941		kgp7433240	2	-0.366566	0.0149659	0.869008
SPNS1	ENSG00000169682	protein_coding	spinster homolog 1 (Drosophila)		1643.96	0.288703	0.00466764	0.118304		kgp3629088	16	0.173643	0.00985891	0.842626
EMC8	ENSG00000131148	protein_coding	ER membrane protein complex subunit 8		383.407	0.194179	0.00467576	0.118304		rs299998	16	-0.195164	0.00197391	0.691292
IZUMO4	ENSG00000099840	protein_coding	IZUMO family member 4		22.1384	-0.453619	0.00466434	0.118304		kgp7797145	19	0.203299	0.0066577	0.811986
ADAM19	ENSG00000135074	protein_coding	ADAM metallopeptidase domain 19		347.724	-0.589247	0.00467908	0.118304		kgp1544472	5	-0.635815	0.00470201	0.781012
SGCB	ENSG00000163069	protein_coding	sarcoglycan, beta (43kDa dystrophin-associated glycoprotein)		169.513	-0.51587	0.00469388	0.118385		rs12502690	4	0.33918	0.0002332	0.402728
RP11-34P1313	ENSG00000241860	processed_transcript			274.031	-0.518231	0.00469429	0.118385		kgp5311369	1	0.358413	0.0072569	0.818296
ST3GAL6	ENSG00000064225	protein_coding	ST3 beta-galactoside alpha-2,3-sialyltransferase 6		985.085	0.504318	0.00472338	0.118391		rs4518168	3	-0.412981	0.00284143	0.735372
SPIRE1	ENSG00000134278	protein_coding	spire-type actin nucleation factor 1		1209.85	0.312704	0.00472459	0.118391		rs1455233	18	-0.293576	0.000615739	0.539057
ZCCHC17	ENSG00000121766	protein_coding	zinc finger, CCHC domain containing 17		465.502	0.263595	0.00470404	0.118391		kgp5881806	1	-0.17494	0.0195561	0.885774
GSDMD	ENSG00000104518	protein_coding	gasdermin D		806.466	-0.500641	0.00471408	0.118391		kgp9461105	8	0.423512	0.00781317	0.823522
ASPHD2	ENSG00000128203	protein_coding	aspartate beta-hydroxylase domain containing 2		77.9185	-0.59898	0.0047209	0.118391		rs4822879	22	0.441177	0.00122816	0.630379
RP11-206L105	ENSG00000240618	lincRNA			18.9444	-0.504478	0.00473712	0.118554		rs2465136	1	0.296771	0.0149392	0.869008
RP11-164J131	ENSG00000258461	processed_transcript			79.0268	-0.396162	0.00476779	0.119171		rs16957167	15	-0.205613	0.00586675	0.800106
ETS1	ENSG00000134954	protein_coding	v-ets avian erythroblastosis virus E26 oncogene homolog 1		2069.24	-0.502743	0.0047826	0.119389		kgp11323347	11	0.449068	0.00144788	0.65491
FAM111A	ENSG00000166801	protein_coding	family with sequence similarity 111, member A		1711.95	-0.374037	0.0047972	0.119444		rs7926943	11	0.204927	0.0127608	0.858563
GOLGA8A	ENSG00000175265	protein_coding	golgin A8 family, member A		900.143	-0.409143	0.00480299	0.119444		rs12438930	15	-0.273483	0.000961459	0.60113
CTD-2201I181	ENSG00000249825	antisense	uncharacterized LOC101929215		7.15426	-0.601747	0.00479087	0.119444		kgp2002044	5	-0.0868097	0.00596269	0.801659
NOP16	ENSG00000048162	protein_coding	NOP16 nucleolar protein		415.839	0.46099	0.00481208	0.119517		rs1039089	5	-0.463802	0.00398173	0.766479
INPP4A	ENSG00000040933	protein_coding	inositol polyphosphate-4-phosphatase, type I, 107kDa		1181.62	-0.285261	0.00481807	0.119517		rs222	2	0.204334	0.00351707	0.754658
TNFSF10	ENSG00000121858	protein_coding	tumor necrosis factor (ligand) superfamily, member 10		1436.8	-0.658011	0.00483062	0.119678		kgp7504232	3	-1.22629	0.000619189	0.539604
STX10	ENSG00000104915	protein_coding	syntaxin 10		563.597	0.239753	0.00484571	0.119901		rs346172	19	-0.15569	0.00617461	0.804691
RP11-327F222	ENSG00000261644	antisense			41.2366	-0.496981	0.00489302	0.12087		rs2111234	16	0.322988	0.00084068	0.580905
RHOBTB3	ENSG00000164292	protein_coding	Rho-related BTB domain containing 3		470.358	-0.585862	0.00490328	0.12087		rs2547996	5	0.676031	0.000143664	0.328639
C7orf57	ENSG00000164746	protein_coding	chromosome 7 open reading frame 57		2.7409	-0.619453	0.00490278	0.12087		-	-	-	-	-
JAK2	ENSG00000096968	protein_coding	Janus kinase 2		1977.84	-0.560609	0.00494003	0.121624		rs4143815	9	-0.606741	0.00076874	0.568648
CYP4V2	ENSG00000145476	protein_coding	cytochrome P450, family 4, subfamily V, polypeptide 2		750.484	-0.471217	0.00495693	0.121887		rs2036912	4	-0.378537	0.00100987	0.609266
RAB11FIP5	ENSG00000135631	protein_coding	RAB11 family interacting protein 5 (class I)		97.51	0.480609	0.00496364	0.1219		kgp114700	2	-0.23558	0.0108737	0.848976
ANO9	ENSG00000185101	protein_coding	anoctamin 9		69.6313	-0.537852	0.00498525	0.122278		rs11246074	11	-0.458015	0.000741125	0.563979
CR1L	ENSG00000197721	protein_coding	complement component (3b/4b) receptor 1-like		10.7348	-0.565822	0.00500679	0.122654		-	-	-	-	-
KIF26B	ENSG00000162849	protein_coding	kinesin family member 26B		10.6797	-0.651244	0.00504795	0.123509		-	-	-	-	-
LIN7A	ENSG00000111052	protein_coding	lin-7 homolog A (C. elegans)		67.3587	0.511617	0.00506135	0.123529		kgp472643	12	0.226191	0.00432502	0.774267
SFT2D2	ENSG00000213064	protein_coding	SFT2 domain containing 2		4115.97	-0.379035	0.00505643	0.123529		kgp8144602	1	0.318326	0.0011474	0.621274
RP4-644L12	ENSG00000229771	lincRNA			26.0979	0.66322	0.00510162	0.123594		rs6029273	20	-0.483991	0.00369149	0.759449
ADORA2B	ENSG00000170425	protein_coding	adenosine A2b receptor		79.3387	0.629338	0.00508441	0.123594		kgp6067115	17	0.741105	5.46257e-05	0.201828
TMEM115	ENSG00000126062	protein_coding	transmembrane protein 115		982.919	0.219752	0.00508289	0.123594		rs739431	3	0.178787	0.00197228	0.691292
ZNF37BP	ENSG00000234420	transcribed_processed_pseudogene	zinc finger protein 37B, pseudogene		223.052	-0.328478	0.00509609	0.123594		rs7084621	10	-0.304832	0.00533189	0.791316
AKT1S1	ENSG00000204673	protein_coding	AKT1 substrate 1 (proline-rich)		1236.42	-0.349385	0.00509612	0.123594		rs1947424	19	0.422382	0.000995546	0.607187
ADAMDEC1	ENSG00000134028	protein_coding	ADAM-like, decysin 1		8885.67	-0.544729	0.00508264	0.123594		rs2291574	8	-0.796424	2.19971e-07	0.00447226
PAOX	ENSG00000148832	protein_coding	polyamine oxidase (exo-N4-amino)		83.2904	-0.339162	0.00511893	0.123632		kgp8982521	10	-0.198488	0.00216666	0.703099
TAP2	ENSG00000204267	protein_coding	transporter 2, ATP-binding cassette, sub-family B (MDR/TAP)		4063.99	-0.537216	0.00512206	0.123632		rs13192471	6	0.8071	0.00018643	0.370854
IDO1	ENSG00000131203	protein_coding	indoleamine 2,3-dioxygenase 1		3539.16	-0.659295	0.00511677	0.123632		rs11782824	8	-1.96585	0.000247314	0.410797
GPR37	ENSG00000170775	protein_coding	G protein-coupled receptor 37 (endothelin receptor type B-like)		1.88826	0.658351	0.00532282	0.124722		-	-	-	-	-
REM1	ENSG00000088320	protein_coding	RAS (RAD and GEM)-like GTP-binding 1		56.1678	0.634395	0.005333	0.124722		rs6087862	20	0.556984	0.00482961	0.783685
FERMT2	ENSG00000073712	protein_coding	fermitin family member 2		180.245	0.592639	0.00533706	0.124722		kgp11122840	14	-0.543376	0.000207874	0.386651
EREG	ENSG00000124882	protein_coding	epiregulin		5328.97	0.590396	0.0052864	0.124722		kgp7574485	4	-0.948402	0.00372872	0.760467
GAMT	ENSG00000130005	protein_coding	guanidinoacetate N-methyltransferase		36.4569	0.51624	0.00532874	0.124722		rs6510612	19	0.346956	0.00121405	0.628963
KLF10	ENSG00000155090	protein_coding	Kruppel-like factor 10		1696.55	0.418475	0.00518477	0.124722		rs6468833	8	-0.305581	0.00794127	0.825476
PHC2	ENSG00000134686	protein_coding	polyhomeotic homolog 2 (Drosophila)		1652.53	0.348934	0.00532061	0.124722		kgp10745360	1	0.239153	0.00110256	0.617488
SLC6A6	ENSG00000131389	protein_coding	solute carrier family 6 (neurotransmitter transporter), member 6		7892.99	0.241335	0.00519097	0.124722		kgp487018	3	0.213875	0.00598484	0.802046
PPP1R8	ENSG00000117751	protein_coding	protein phosphatase 1, regulatory subunit 8		804.931	0.127266	0.00522146	0.124722		rs6598927	1	0.129226	0.000786494	0.571624
LEPROTL1	ENSG00000104660	protein_coding	leptin receptor overlapping transcript-like 1		1138.68	-0.220801	0.0051853	0.124722		rs643472	8	-0.14215	0.0073562	0.819149
VPS13C	ENSG00000129003	protein_coding	vacuolar protein sorting 13 homolog C (S. cerevisiae)		4686.12	-0.358007	0.00527752	0.124722		kgp7010414	15	-0.37821	0.00031227	0.444119
IFFO2	ENSG00000169991	protein_coding	intermediate filament family orphan 2		279.27	-0.366591	0.00526942	0.124722		kgp3125648	1	0.260134	0.00694942	0.815145
DOCK8	ENSG00000107099	protein_coding	dedicator of cytokinesis 8		4853.46	-0.36959	0.00524524	0.124722		kgp2294000	9	0.259436	6.28522e-05	0.219762
TBC1D31	ENSG00000156787	protein_coding	TBC1 domain family, member 31		125.137	-0.389636	0.00524962	0.124722		rs4242341	8	-0.141255	0.0136318	0.863575
STOM	ENSG00000148175	protein_coding	stomatin		4539.79	-0.423509	0.00530896	0.124722		kgp4618618	9	0.30915	0.00762765	0.822367
TRAF4	ENSG00000076604	protein_coding	TNF receptor-associated factor 4		126.294	-0.468543	0.00524204	0.124722		kgp7904326	17	-0.361469	0.0029885	0.73991
BZRAP1-AS1	ENSG00000265148	antisense	BZRAP1 antisense RNA 1		169.455	-0.484451	0.00524052	0.124722		kgp2966542	17	-0.703204	7.67404e-06	0.0623995
BLNK	ENSG00000095585	protein_coding	B-cell linker		175.368	-0.499153	0.0052621	0.124722		kgp7477871	10	-0.461373	0.00261904	0.726312
IL10RA	ENSG00000110324	protein_coding	interleukin 10 receptor, alpha		11826	-0.509318	0.0052921	0.124722		rs2256111	11	0.550323	0.0039056	0.764996
KCNMB1	ENSG00000145936	protein_coding	potassium channel subfamily M regulatory beta subunit 1		250.987	-0.509324	0.00528363	0.124722		rs4868080	5	-0.614947	8.61165e-05	0.258688
PARP9	ENSG00000138496	protein_coding	poly (ADP-ribose) polymerase family, member 9		2811.91	-0.529257	0.00526935	0.124722		kgp4113884	3	-0.50813	0.00651507	0.810091
LYZ	ENSG00000090382	protein_coding	lysozyme		112778	-0.572298	0.00531769	0.124722		rs789334	12	0.541031	0.00367883	0.758932
AC0092993	ENSG00000227403	lincRNA			12.0742	-0.581002	0.00526194	0.124722		kgp4039622	2	-0.236991	0.000470863	0.506335
KLRC4-KLRK1	ENSG00000255819	protein_coding	KLRC4-KLRK1 readthrough		21.3096	-0.60606	0.00532109	0.124722		kgp7461909	12	-0.309577	0.00930738	0.837808
IGSF22	ENSG00000179057	protein_coding	immunoglobulin superfamily, member 22		1.57578	-0.6396	0.00526764	0.124722		-	-	-	-	-
LYPD5	ENSG00000159871	protein_coding	LY6/PLAUR domain containing 5		21.2095	-0.649013	0.00533818	0.124722		-	-	-	-	-
ANKRD20A11P	ENSG00000215559	transcribed_unprocessed_pseudogene	ankyrin repeat domain 20 family, member A11, pseudogene		1.147	-0.66346	0.00528362	0.124722		-	-	-	-	-
METTL9	ENSG00000197006	protein_coding	methyltransferase like 9		1292.66	0.366108	0.0053638	0.125063		kgp3001185	16	0.241469	0.00790094	0.824989
PIF1	ENSG00000140451	protein_coding	PIF1 5'-to-3' DNA helicase		35.637	-0.588943	0.00536549	0.125063		kgp10121657	15	-0.73271	0.00958306	0.840258
FBXO6	ENSG00000116663	protein_coding	F-box protein 6		650.605	-0.551107	0.00539836	0.125681		kgp2336876	1	0.759679	0.00375933	0.761388
IGSF6	ENSG00000140749	protein_coding	immunoglobulin superfamily, member 6		6307.19	-0.359961	0.00542043	0.125786		kgp6184723	16	-0.280255	0.0228089	0.894404
DPY19L2P2	ENSG00000170629	transcribed_unprocessed_pseudogene	DPY19L2 pseudogene 2		15.1898	-0.560101	0.00542204	0.125786		rs12705150	7	-0.13057	0.00721447	0.818254
PROB1	ENSG00000228672	protein_coding	proline-rich basic protein 1		15.9645	-0.58306	0.00540953	0.125786		-	-	-	-	-
NLRP12	ENSG00000142405	protein_coding	NLR family, pyrin domain containing 12		57.6295	0.524443	0.00544745	0.125931		-	-	-	-	-
LRRC3	ENSG00000160233	protein_coding	leucine rich repeat containing 3		342.308	0.363544	0.00543674	0.125931		rs2838698	21	0.203722	0.00243061	0.716205
STAT2	ENSG00000170581	protein_coding	signal transducer and activator of transcription 2, 113kDa		3802.29	-0.518374	0.00544124	0.125931		rs12580100	12	0.564277	0.0118663	0.853477
PRPS2	ENSG00000101911	protein_coding	phosphoribosyl pyrophosphate synthetase 2		745.1	-0.305896	0.00545465	0.125949		-	-	-	-	-
ICOSLG	ENSG00000160223	protein_coding	inducible T-cell co-stimulator ligand		1393.25	0.538413	0.00546252	0.125983		kgp5479603	21	0.884166	1.40822e-09	7.54565e-05
CHST7	ENSG00000147119	protein_coding	carbohydrate (N-acetylglucosamine 6-O) sulfotransferase 7		282.125	0.558837	0.00547988	0.126016		-	-	-	-	-
CD99	ENSG00000002586	protein_coding	CD99 molecule		4300.26	0.357367	0.00548401	0.126016		-	-	-	-	-
DECR1	ENSG00000104325	protein_coding	2,4-dienoyl CoA reductase 1, mitochondrial		1463.96	-0.379417	0.00548952	0.126016		rs39502	8	-0.239298	0.00867666	0.833063
RP11-456K231	ENSG00000267414	lincRNA			4.29526	-0.570224	0.00548045	0.126016		rs12232728	18	-0.102751	0.000779023	0.570502
BNIP3	ENSG00000176171	protein_coding	BCL2/adenovirus E1B 19kDa interacting protein 3		426.553	0.489654	0.00552105	0.126582		kgp9466611	10	-0.528515	0.00118195	0.62478
INTS5	ENSG00000185085	protein_coding	integrator complex subunit 5		508.664	0.215255	0.00552703	0.126582		kgp1247556	11	-0.188785	0.00253683	0.723074
C21orf91	ENSG00000154642	protein_coding	chromosome 21 open reading frame 91		372.336	-0.509257	0.00556157	0.127077		kgp11150743	21	0.412409	0.00171348	0.676631
LINC01237	ENSG00000233806	processed_transcript	long intergenic non-protein coding RNA 1237		5.37663	-0.55825	0.00555948	0.127077		kgp2745767	2	0.228507	0.00174288	0.678066
RNASE1	ENSG00000129538	protein_coding	ribonuclease, RNase A family, 1 (pancreatic)		21150	0.583848	0.00560664	0.127663		rs944438	14	-0.690798	0.000419857	0.487619
ADCY6	ENSG00000174233	protein_coding	adenylate cyclase 6		68.1576	0.514563	0.00559733	0.127663		-	-	-	-	-
CD74	ENSG00000019582	protein_coding	CD74 molecule, major histocompatibility complex, class II invariant chain		81405.3	-0.591029	0.00560511	0.127663		rs3776084	5	-0.72405	0.0029789	0.739765
ERMN	ENSG00000136541	protein_coding	ermin, ERM-like protein		34.6299	-0.469257	0.00567352	0.128913		-	-	-	-	-
TNFSF13B	ENSG00000102524	protein_coding	tumor necrosis factor (ligand) superfamily, member 13b		2265.56	-0.59056	0.00567465	0.128913		rs9520585	13	-0.684662	0.00183244	0.684141
IKZF2	ENSG00000030419	protein_coding	IKAROS family zinc finger 2 (Helios)		152.631	-0.518267	0.00568639	0.129031		rs10179508	2	-0.258148	0.00593678	0.801381
POLR2J	ENSG00000005075	protein_coding	polymerase (RNA) II (DNA directed) polypeptide J, 13.3kDa		579.251	0.186782	0.00571051	0.12943		kgp1881515	7	-0.093872	0.00473197	0.781673
ANKRD2	ENSG00000165887	protein_coding	ankyrin repeat domain 2 (stretch responsive muscle)		1.27231	-0.653056	0.00571962	0.129475		-	-	-	-	-
RP11-10J51	ENSG00000226004	lincRNA			26.355	-0.655646	0.00572566	0.129475		rs6933404	6	0.984561	0.00263751	0.726714
ABTB2	ENSG00000166016	protein_coding	ankyrin repeat and BTB (POZ) domain containing 2		367.309	0.604809	0.00574911	0.129856		rs10768053	11	0.694188	0.000293861	0.437697
ZFP1	ENSG00000184517	protein_coding	ZFP1 zinc finger protein		140.363	0.273882	0.00578479	0.130007		rs9939124	16	-0.238318	3.05585e-05	0.144914
NUDT1	ENSG00000106268	protein_coding	nudix (nucleoside diphosphate linked moiety X)-type motif 1		184.312	0.27333	0.00578879	0.130007		kgp6478793	7	0.152991	0.00466615	0.780143
TMEM11	ENSG00000178307	protein_coding	transmembrane protein 11		351.302	0.242708	0.00578056	0.130007		rs4889730	17	-0.149462	0.00441044	0.7753
MAN2A1	ENSG00000112893	protein_coding	mannosidase, alpha, class 2A, member 1		1735.24	-0.318207	0.00577819	0.130007		rs9326745	5	-0.158869	0.00523742	0.789787
GUCA1A	ENSG00000048545	protein_coding	guanylate cyclase activator 1A (retina)		1.2038	-0.525824	0.00577604	0.130007		-	-	-	-	-
RP4-742C1912	ENSG00000225720	transcribed_unprocessed_pseudogene			4.93528	-0.652188	0.00580716	0.130271		kgp3296851	22	-0.488064	0.00353524	0.754906
KLRD1	ENSG00000134539	protein_coding	killer cell lectin-like receptor subfamily D, member 1		161.836	-0.588474	0.00582499	0.130374		rs2305849	12	0.392993	0.0265483	0.901416
FAM83D	ENSG00000101447	protein_coding	family with sequence similarity 83, member D		19.8983	-0.607925	0.00581871	0.130374		-	-	-	-	-
SLC10A3	ENSG00000126903	protein_coding	solute carrier family 10, member 3		399.374	0.265716	0.00586417	0.131015		-	-	-	-	-
RADIL	ENSG00000157927	protein_coding	Ras association and DIL domains		3.4585	-0.635087	0.00586695	0.131015		-	-	-	-	-
IL1R1	ENSG00000115594	protein_coding	interleukin 1 receptor, type I		944.43	0.574447	0.00590598	0.1316		rs10199359	2	0.642341	0.0110207	0.849423
LONRF1	ENSG00000154359	protein_coding	LON peptidase N-terminal domain and ring finger 1		860.016	-0.46898	0.00590651	0.1316		kgp8607997	8	-0.516115	0.000420912	0.488028
TNFRSF21	ENSG00000146072	protein_coding	tumor necrosis factor receptor superfamily, member 21		876.453	0.628625	0.00594393	0.132284		kgp10735003	6	-0.891037	0.00103895	0.612391
DPF3	ENSG00000205683	protein_coding	D4, zinc and double PHD fingers, family 3		6.95483	-0.568972	0.00596419	0.132586		-	-	-	-	-
MIIP	ENSG00000116691	protein_coding	migration and invasion inhibitory protein		301.919	-0.413453	0.00599474	0.132666		rs12045323	1	0.333171	0.00223743	0.706784
RP5-1171I105	ENSG00000265206	antisense			217.658	-0.435777	0.00598995	0.132666		rs17658398	17	0.294122	0.00374227	0.761178
CBLN3	ENSG00000139899	protein_coding	cerebellin 3 precursor		98.6753	-0.551443	0.0059792	0.132666		kgp469846	14	-0.549186	0.00148338	0.656922
CD274	ENSG00000120217	protein_coding	CD274 molecule		5035.78	-0.559795	0.00599343	0.132666		rs4143815	9	-0.738869	0.000152877	0.338659
RYR1	ENSG00000196218	protein_coding	ryanodine receptor 1 (skeletal)		131.642	-0.513301	0.0060241	0.133017		rs2288906	19	-0.515874	0.00100915	0.609245
GRIN3A	ENSG00000198785	protein_coding	glutamate receptor, ionotropic, N-methyl-D-aspartate 3A		206.946	-0.654617	0.00602167	0.133017		-	-	-	-	-
GPCPD1	ENSG00000125772	protein_coding	glycerophosphocholine phosphodiesterase GDE1 homolog (S. cerevisiae)		1272.12	-0.340642	0.00603618	0.133134		kgp7707321	20	0.314146	0.000381623	0.474695
CHN1	ENSG00000128656	protein_coding	chimerin 1		9.6776	-0.535383	0.00605615	0.133276		-	-	-	-	-
DIRAS2	ENSG00000165023	protein_coding	DIRAS family, GTP-binding RAS-like 2		35.2297	-0.648981	0.00605616	0.133276		-	-	-	-	-
RHCG	ENSG00000140519	protein_coding	Rh family, C glycoprotein		8.51617	0.652518	0.00606699	0.133366		-	-	-	-	-
CCDC154	ENSG00000197599	protein_coding	coiled-coil domain containing 154		24.6995	-0.465427	0.0060818	0.133542		kgp7692693	16	0.270787	0.0142623	0.86665
MS4A2	ENSG00000149534	protein_coding	membrane-spanning 4-domains, subfamily A, member 2		43.8908	0.612474	0.00611312	0.13408		-	-	-	-	-
PHLDA2	ENSG00000181649	protein_coding	pleckstrin homology-like domain, family A, member 2		275.873	-0.448898	0.00612247	0.134136		rs4758471	11	0.349498	0.00439168	0.7753
MYO1A	ENSG00000166866	protein_coding	myosin IA		11.3496	-0.625617	0.00612978	0.134147		-	-	-	-	-
HEG1	ENSG00000173706	protein_coding	heart development protein with EGF-like domains 1		1234.49	-0.455332	0.00613978	0.134217		rs2981495	3	-0.338161	0.0146548	0.868138
ORM1	ENSG00000229314	protein_coding	orosomucoid 1		8.24456	0.596021	0.00620428	0.134583		-	-	-	-	-
CEP120	ENSG00000168944	protein_coding	centrosomal protein 120kDa		458.186	-0.310162	0.00618605	0.134583		rs11746266	5	0.163046	0.00140786	0.650536
DHRS4-AS1	ENSG00000215256	antisense	DHRS4 antisense RNA 1		235.823	-0.42434	0.00619774	0.134583		rs12435647	14	0.415243	0.000868672	0.586524
CCND2	ENSG00000118971	protein_coding	cyclin D2		679.795	-0.528191	0.00617381	0.134583		rs2240762	12	0.466037	0.000791339	0.572215
LAP3	ENSG00000002549	protein_coding	leucine aminopeptidase 3		8914.24	-0.54232	0.0062044	0.134583		rs7682632	4	0.524075	0.0103303	0.845261
SYNGR3	ENSG00000127561	protein_coding	synaptogyrin 3		40.5924	-0.554451	0.00616607	0.134583		kgp2143400	16	0.516378	0.000119932	0.303544
CCL7	ENSG00000108688	protein_coding	chemokine (C-C motif) ligand 7		8300.25	-0.634348	0.00619028	0.134583		rs280043	17	1.30656	0.00382399	0.763372
TMA7	ENSG00000232112	protein_coding	translation machinery associated 7 homolog (S. cerevisiae)		1215.13	0.206358	0.00623874	0.13494		-	-	-	-	-
FYB	ENSG00000082074	protein_coding	FYN binding protein		3422.51	-0.371748	0.00624385	0.13494		kgp6905574	5	0.276282	0.00240487	0.715069
XRN1	ENSG00000114127	protein_coding	5'-3' exoribonuclease 1		2156.51	-0.488369	0.00624824	0.13494		rs7647899	3	-0.298772	0.0109576	0.849246
MAP9	ENSG00000164114	protein_coding	microtubule-associated protein 9		28.437	-0.539403	0.00624167	0.13494		-	-	-	-	-
SLCO4A1	ENSG00000101187	protein_coding	solute carrier organic anion transporter family, member 4A1		737.712	0.515148	0.00627146	0.135293		kgp11164273	20	0.619399	0.00105622	0.614143
SIRPG	ENSG00000089012	protein_coding	signal-regulatory protein gamma		42.2045	-0.60247	0.00627966	0.135322		rs202549	20	0.46572	0.000278201	0.430067
ENTPD1	ENSG00000138185	protein_coding	ectonucleoside triphosphate diphosphohydrolase 1		1167.92	-0.490636	0.00631041	0.135836		rs1998409	10	0.428598	0.00237538	0.713433
MAP3K9	ENSG00000006432	protein_coding	mitogen-activated protein kinase kinase kinase 9		29.0821	-0.530971	0.00633448	0.136205		-	-	-	-	-
MS4A3	ENSG00000149516	protein_coding	membrane-spanning 4-domains, subfamily A, member 3 (hematopoietic cell-specific)		19.8274	0.603861	0.00636346	0.136459		rs10501381	11	0.647908	1.8492e-05	0.108753
RUFY3	ENSG00000018189	protein_coding	RUN and FYVE domain containing 3		834.103	-0.341446	0.00636125	0.136459		rs12506660	4	0.229583	0.00610345	0.803906
TRIB2	ENSG00000071575	protein_coding	tribbles pseudokinase 2		149.815	-0.504218	0.00636706	0.136459		kgp3556151	2	0.414842	0.00784874	0.824062
RP3-437C151	ENSG00000232702	processed_pseudogene			15.7242	0.585105	0.00639262	0.136808		rs1507912	6	1.06062	0.000812619	0.57565
SCAND1	ENSG00000171222	protein_coding	SCAN domain containing 1		397.94	0.19391	0.00639726	0.136808		rs6071459	20	-0.220199	0.00180731	0.682679
ASAH2B	ENSG00000204147	protein_coding	N-acylsphingosine amidohydrolase (non-lysosomal ceramidase) 2B		30.5771	-0.50785	0.00640455	0.136816		-	-	-	-	-
CHMP1B	ENSG00000255112	protein_coding	charged multivesicular body protein 1B		1999.53	0.365165	0.00644086	0.137294		rs1013459	18	0.529212	0.00230583	0.7098
PRR5L	ENSG00000135362	protein_coding	proline rich 5 like		111.786	-0.527888	0.00644085	0.137294		rs2422180	11	-0.439884	0.00197144	0.691292
GZMM	ENSG00000197540	protein_coding	granzyme M (lymphocyte met-ase 1)		46.3838	-0.558396	0.00645165	0.137375		kgp2733485	19	0.602949	0.00103464	0.612391
PELO	ENSG00000152684	protein_coding	pelota homolog (Drosophila)		505.298	0.247429	0.00646461	0.137459		rs889294	5	0.132143	0.0110878	0.84954
KCTD17	ENSG00000100379	protein_coding	potassium channel tetramerization domain containing 17		306.982	-0.421198	0.00647353	0.137459		kgp10280966	22	0.363231	0.000615079	0.538809
PSMA6P1	ENSG00000215414	processed_pseudogene	proteasome (prosome, macropain) subunit, alpha type, 6 pseudogene 1		4.45482	-0.640212	0.00647653	0.137459		-	-	-	-	-
GLUD1P3	ENSG00000250959	transcribed_unprocessed_pseudogene	glutamate dehydrogenase 1 pseudogene 3		38.5161	0.520058	0.00650639	0.137849		-	-	-	-	-
B3GNTL1	ENSG00000175711	protein_coding	UDP-GlcNAc:betaGal beta-1,3-N-acetylglucosaminyltransferase-like 1		69.5251	-0.324441	0.00652087	0.137849		rs9903292	17	-0.242696	0.000461203	0.503831
DYNLT1	ENSG00000146425	protein_coding	dynein, light chain, Tctex-type 1		1252.07	-0.436224	0.00652291	0.137849		kgp11992885	6	-0.257861	0.00169543	0.675157
SLAIN1	ENSG00000139737	protein_coding	SLAIN motif family, member 1		47.2364	-0.511876	0.00651802	0.137849		rs9530810	13	0.361272	0.000143777	0.328725
EHF	ENSG00000135373	protein_coding	ets homologous factor		34.9846	0.574133	0.00653128	0.13787		-	-	-	-	-
SP140L	ENSG00000185404	protein_coding	SP140 nuclear body protein-like		697.037	-0.414981	0.00653789	0.13787		kgp2730788	2	-0.353677	0.00136552	0.646534
NPR3	ENSG00000113389	protein_coding	natriuretic peptide receptor 3		4.07602	0.646027	0.00657165	0.13822		-	-	-	-	-
TTC39C	ENSG00000168234	protein_coding	tetratricopeptide repeat domain 39C		471.749	-0.341088	0.00658258	0.13822		rs9947594	18	0.25458	0.00621372	0.804693
DENND1B	ENSG00000213047	protein_coding	DENN/MADD domain containing 1B		1043.76	-0.373516	0.00658193	0.13822		rs12087101	1	0.328515	0.00413937	0.770596
RP11-404F102	ENSG00000228863	antisense			5.65784	-0.600753	0.00656447	0.13822		rs983494	1	0.203107	0.00143654	0.65464
VLDLR	ENSG00000147852	protein_coding	very low density lipoprotein receptor		23.7863	0.553032	0.00659066	0.138242		-	-	-	-	-
TRAV29DV5	ENSG00000211810	TR_V_gene	T cell receptor alpha variable 29/delta variable 5 (gene/pseudogene)		5.63699	-0.600958	0.00660825	0.138464		rs6572755	14	-0.516995	0.00142271	0.652671
RNASE2	ENSG00000169385	protein_coding	ribonuclease, RNase A family, 2 (liver, eosinophil-derived neurotoxin)		42.418	0.594615	0.00664551	0.138949		kgp3211278	14	0.939168	0.000217925	0.393642
RP11-412D94	ENSG00000260329	antisense			2.89807	-0.553593	0.00664038	0.138949		rs10746054	12	0.0802688	0.00166173	0.672586
TTC39B	ENSG00000155158	protein_coding	tetratricopeptide repeat domain 39B		1275.83	-0.543649	0.0066787	0.139347		rs4008004	9	-1.11506	4.74106e-11	4.71788e-06
TRAV13-1	ENSG00000211788	TR_V_gene	T cell receptor alpha variable 13-1		7.25216	-0.594195	0.00667299	0.139347		rs9972232	14	0.580901	0.00064122	0.543281
SAMD10	ENSG00000130590	protein_coding	sterile alpha motif domain containing 10		62.6432	-0.445182	0.00668734	0.13938		kgp6379596	20	0.347552	0.00682051	0.813665
AC0796304	ENSG00000225342	antisense			31.5356	-0.59988	0.00669982	0.139492		kgp8813963	12	0.396165	0.000649485	0.54461
USP43	ENSG00000154914	protein_coding	ubiquitin specific peptidase 43		4.92405	-0.519085	0.00672065	0.139778		-	-	-	-	-
RNASE4	ENSG00000258818	protein_coding	ribonuclease, RNase A family, 4		166.769	0.592303	0.00677274	0.140298		rs12587456	14	0.672578	0.000222304	0.395543
NOC4L	ENSG00000184967	protein_coding	nucleolar complex associated 4 homolog (S. cerevisiae)		200.929	0.262827	0.00677416	0.140298		kgp5002725	12	-0.306679	0.00190188	0.687905
DENND1C	ENSG00000205744	protein_coding	DENN/MADD domain containing 1C		605.459	-0.239868	0.00675803	0.140298		rs11880033	19	-0.170321	0.00473846	0.781927
CTC-260E64	ENSG00000280079	TEC			3.81494	-0.590846	0.00676697	0.140298		-	-	-	-	-
PARP3	ENSG00000041880	protein_coding	poly (ADP-ribose) polymerase family, member 3		216.891	-0.462973	0.00679159	0.140512		kgp1214348	3	0.568299	1.3398e-05	0.0884152
SMKR1	ENSG00000240204	protein_coding	small lysine-rich protein 1		3.32386	-0.58121	0.00681225	0.140726		-	-	-	-	-
RP5-1028K72	ENSG00000266088	lincRNA			6.06937	-0.635966	0.00681624	0.140726		rs7502966	17	0.254322	0.0018553	0.685419
MYH3	ENSG00000109063	protein_coding	myosin, heavy chain 3, skeletal muscle, embryonic		39.9591	-0.383596	0.00682456	0.14075		-	-	-	-	-
FXYD5	ENSG00000089327	protein_coding	FXYD domain containing ion transport regulator 5		2813.54	0.298123	0.00686186	0.141371		rs1633921	19	-0.210378	0.000203104	0.382143
CLC	ENSG00000105205	protein_coding	Charcot-Leyden crystal galectin		152.726	0.612199	0.00689108	0.141677		rs1155506	19	-0.745136	0.00711146	0.817225
DCBLD2	ENSG00000057019	protein_coding	discoidin, CUB and LCCL domain containing 2		175.398	0.445811	0.00688741	0.141677		kgp7552239	3	-0.215555	0.00439999	0.7753
SDHAF2	ENSG00000167985	protein_coding	succinate dehydrogenase complex assembly factor 2		444.36	0.25282	0.00691367	0.141993		rs489172	11	-0.240228	0.000318585	0.447819
CACNA1H	ENSG00000196557	protein_coding	calcium channel, voltage-dependent, T type, alpha 1H subunit		6.39545	-0.56768	0.00692138	0.142004		-	-	-	-	-
GPR183	ENSG00000169508	protein_coding	G protein-coupled receptor 183		2055.12	0.478407	0.00694676	0.142376		kgp8446494	13	-0.538882	0.00157998	0.66485
TRDV1	ENSG00000211804	TR_V_gene	T cell receptor delta variable 1		2.15792	-0.636201	0.00696458	0.142593		rs17122962	14	0.671544	0.00012581	0.309894
MRPL33	ENSG00000243147	protein_coding	mitochondrial ribosomal protein L33		347.794	0.174428	0.0069878	0.14292		rs12473028	2	-0.175085	0.00545753	0.792899
AF1651387	ENSG00000243440	protein_coding	HCG1818297 {ECO:0000313|EMBL:EAX10052.1}; Protein LOC388813 {ECO:0000313|Ensembl:ENSP00000383407}		9.33632	-0.554167	0.00702396	0.14351		-	-	-	-	-
TRIM22	ENSG00000132274	protein_coding	tripartite motif containing 22		4509.56	-0.502107	0.00703401	0.143567		kgp11159482	11	0.658504	0.000687486	0.552846
EIF4EP2	ENSG00000229944	processed_pseudogene	eukaryotic translation initiation factor 4E pseudogene 2		49.1603	0.518573	0.0070649	0.14375		kgp6655472	17	0.9809	0.000839119	0.580449
AGMAT	ENSG00000116771	protein_coding	agmatine ureohydrolase (agmatinase)		28.6883	-0.5586	0.00705496	0.14375		-	-	-	-	-
RN7SL431P	ENSG00000264384	misc_RNA	RNA, 7SL, cytoplasmic 431, pseudogene		1.86194	-0.602797	0.00705866	0.14375		rs4345834	1	0.363418	0.000614973	0.538809
PHLDA1	ENSG00000139289	protein_coding	pleckstrin homology-like domain, family A, member 1		1720.64	0.558301	0.00711019	0.144523		kgp10865621	12	-0.556488	0.00115922	0.622366
PCGF1	ENSG00000115289	protein_coding	polycomb group ring finger 1		125.747	0.232914	0.00714788	0.145139		kgp2527998	2	-0.190267	0.0269352	0.902092
SFI1	ENSG00000198089	protein_coding	Sfi1 homolog, spindle assembly associated (yeast)		332.36	-0.303585	0.00717855	0.145612		rs2072196	22	0.262107	0.0017192	0.677021
RP11-236B185	ENSG00000273124	lincRNA			1.51954	0.640961	0.00728383	0.145917		kgp1161701	10	-0.581438	0.00154135	0.661852
TCL6	ENSG00000187621	processed_transcript	T-cell leukemia/lymphoma 6 (non-protein coding)		11.4188	0.639906	0.00729167	0.145917		kgp7870643	14	-0.318747	0.000320715	0.4486
LIPN	ENSG00000204020	protein_coding	lipase, family member N		5.91272	0.638849	0.0072948	0.145917		-	-	-	-	-
SV2B	ENSG00000185518	protein_coding	synaptic vesicle glycoprotein 2B		48.5097	0.621915	0.00726465	0.145917		-	-	-	-	-
HLX	ENSG00000136630	protein_coding	H2.0-like homeobox		812.606	0.459363	0.00724889	0.145917		rs7530302	1	0.500178	0.0045575	0.777638
HN1L	ENSG00000206053	protein_coding	hematological and neurological expressed 1-like		1329.14	0.347746	0.0072643	0.145917		rs323073	16	-0.306132	0.000229557	0.400447
MRPS2	ENSG00000122140	protein_coding	mitochondrial ribosomal protein S2		439.981	0.274917	0.00730473	0.145917		kgp6838027	9	-0.199613	0.000535038	0.524285
CUX1	ENSG00000257923	protein_coding	cut-like homeobox 1		2553.9	0.189	0.00729734	0.145917		rs6975738	7	-0.110503	0.00279955	0.732815
SEC24C	ENSG00000176986	protein_coding	SEC24 family member C		3139.29	0.146665	0.00727203	0.145917		rs2675677	10	0.0965839	0.00154087	0.661736
STAG3L5P	ENSG00000242294	transcribed_unprocessed_pseudogene	stromal antigen 3-like 5 pseudogene		123.874	-0.416312	0.00725225	0.145917		rs11761624	7	0.401782	0.000839551	0.580555
AKAP7	ENSG00000118507	protein_coding	A kinase (PRKA) anchor protein 7		114.619	-0.463706	0.0072528	0.145917		kgp10445531	6	0.230769	0.00226956	0.7083
BTN2A2	ENSG00000124508	protein_coding	butyrophilin, subfamily 2, member A2		687.43	-0.525457	0.00720289	0.145917		rs10484440	6	-0.72151	0.000807866	0.575355
PRKCQ-AS1	ENSG00000237943	processed_transcript	PRKCQ antisense RNA 1		53.6299	-0.538696	0.00724168	0.145917		kgp11966217	10	0.621516	0.000183335	0.368689
GIMAP8	ENSG00000171115	protein_coding	GTPase, IMAP family member 8		1344.71	-0.542729	0.00725848	0.145917		rs6977381	7	0.595337	0.000360608	0.464665
AC1294926	ENSG00000214999	antisense			4.64622	-0.574763	0.00721359	0.145917		rs11652328	17	-0.102173	0.000694505	0.553449
RP11-153M73	ENSG00000250771	transcribed_unprocessed_pseudogene			144.589	0.568473	0.00732731	0.146131		rs6849116	4	-0.635942	0.00056346	0.529399
ZNF831	ENSG00000124203	protein_coding	zinc finger protein 831		60.5293	-0.526078	0.00733227	0.146131		-	-	-	-	-
CNKSR2	ENSG00000149970	protein_coding	connector enhancer of kinase suppressor of Ras 2		11.3849	-0.600858	0.00733772	0.146131		-	-	-	-	-
ZNF841	ENSG00000197608	protein_coding	zinc finger protein 841		367.548	-0.280675	0.00734979	0.146224		kgp5410473	19	-0.313284	0.000553117	0.526704
CTSF	ENSG00000174080	protein_coding	cathepsin F		162.02	0.597886	0.00736212	0.146243		rs2511224	11	0.469483	0.0140273	0.865604
CXCR1	ENSG00000163464	protein_coding	chemokine (C-X-C motif) receptor 1		16.5452	0.57355	0.00738117	0.146243		-	-	-	-	-
ANPEP	ENSG00000166825	protein_coding	alanyl (membrane) aminopeptidase		17665.9	0.317771	0.00737389	0.146243		kgp7135612	15	-0.380137	1.71799e-05	0.10371
EMC6	ENSG00000127774	protein_coding	ER membrane protein complex subunit 6		262.132	0.194854	0.00738787	0.146243		kgp12016360	17	0.176142	0.00188216	0.687222
LINC01281	ENSG00000235304	lincRNA	long intergenic non-protein coding RNA 1281		8.58885	-0.54704	0.00737967	0.146243		-	-	-	-	-
ULK2	ENSG00000083290	protein_coding	unc-51 like autophagy activating kinase 2		737.309	-0.271533	0.00742052	0.146741		rs1295329	17	0.302367	0.000182737	0.368055
SLC37A1	ENSG00000160190	protein_coding	solute carrier family 37 (glucose-6-phosphate transporter), member 1		456.653	-0.363897	0.00747913	0.147752		kgp2131749	21	0.385332	0.000276892	0.429888
METTL21B	ENSG00000123427	protein_coding	methyltransferase like 21B		402.217	-0.430122	0.00750417	0.148098		rs701008	12	0.408099	2.98653e-05	0.143692
TCTEX1D1	ENSG00000152760	protein_coding	Tctex1 domain containing 1		60.2005	0.625677	0.00755603	0.148357		kgp1266690	1	1.50859	1.40817e-16	8.02555e-11
PCSK6	ENSG00000140479	protein_coding	proprotein convertase subtilisin/kexin type 6		683.962	0.59083	0.00753043	0.148357		rs28685143	15	-0.80674	0.00267276	0.728069
OXR1	ENSG00000164830	protein_coding	oxidation resistance 1		1134.14	0.458855	0.0075619	0.148357		rs17211906	8	-0.376686	0.00419387	0.771544
LGALS1	ENSG00000100097	protein_coding	lectin, galactoside-binding, soluble, 1		10567.6	0.313559	0.00755061	0.148357		rs1569785	22	-0.262534	0.00157997	0.66485
STX16	ENSG00000124222	protein_coding	syntaxin 16		1937.48	-0.163832	0.00756245	0.148357		kgp2975770	20	0.12579	0.00396725	0.766143
FAHD2B	ENSG00000144199	protein_coding	fumarylacetoacetate hydrolase domain containing 2B		37.4303	-0.438096	0.00754118	0.148357		kgp930715	2	0.241446	0.0426296	0.922512
TSEN54	ENSG00000182173	protein_coding	TSEN54 tRNA splicing endonuclease subunit		119.991	-0.35822	0.00758285	0.148461		rs8076892	17	-0.322809	0.000523341	0.521778
RP11-44F148	ENSG00000262714	lincRNA			2.899	-0.573923	0.00758176	0.148461		kgp5099376	16	0.0845227	0.0047433	0.782199
ANGPTL2	ENSG00000136859	protein_coding	angiopoietin-like 2		19.4947	0.633561	0.00767959	0.14852		-	-	-	-	-
HMCN1	ENSG00000143341	protein_coding	hemicentin 1		6.29759	0.632437	0.00761964	0.14852		-	-	-	-	-
HOMER3	ENSG00000051128	protein_coding	homer homolog 3 (Drosophila)		689.477	0.383042	0.00764561	0.14852		rs10419226	19	0.324452	8.86591e-05	0.261933
COMMD6	ENSG00000188243	protein_coding	COMM domain containing 6		520.498	0.241191	0.00766436	0.14852		rs1409578	13	0.172059	0.000484028	0.509823
ARHGEF6	ENSG00000129675	protein_coding	Rac/Cdc42 guanine nucleotide exchange factor (GEF) 6		1374.19	-0.294582	0.00762278	0.14852		-	-	-	-	-
ACAP1	ENSG00000072818	protein_coding	ArfGAP with coiled-coil, ankyrin repeat and PH domains 1		542.987	-0.413543	0.0076791	0.14852		kgp13969719	17	0.548769	0.000679187	0.552195
NUP50-AS1	ENSG00000226328	lincRNA	NUP50 antisense RNA 1 (head to head)		63.3423	-0.433791	0.00760013	0.14852		rs3747243	22	-0.33877	0.000427554	0.491549
ZNF507	ENSG00000168813	protein_coding	zinc finger protein 507		122.103	-0.474503	0.00767606	0.14852		kgp9503173	19	-0.364629	0.000224571	0.396685
HMGB2	ENSG00000164104	protein_coding	high mobility group box 2		580.725	-0.491797	0.00765011	0.14852		rs13128039	4	0.340795	0.00495761	0.78527
PGBD5	ENSG00000177614	protein_coding	piggyBac transposable element derived 5		120.759	-0.528725	0.00761816	0.14852		rs568916	1	0.474078	0.000333171	0.452887
PLCH2	ENSG00000149527	protein_coding	phospholipase C, eta 2		27.3218	-0.540617	0.00764869	0.14852		-	-	-	-	-
OR52N4	ENSG00000181074	protein_coding	olfactory receptor, family 52, subfamily N, member 4 (gene/pseudogene)		4.9731	-0.575634	0.00769144	0.14852		-	-	-	-	-
CFAP54	ENSG00000188596	protein_coding	cilia and flagella associated 54		3.43742	-0.617388	0.00768693	0.14852		-	-	-	-	-
RP5-887A101	ENSG00000234184	lincRNA			1.20594	-0.630307	0.00768546	0.14852		-	-	-	-	-
SSBP1	ENSG00000106028	protein_coding	single-stranded DNA binding protein 1, mitochondrial		776.484	0.141921	0.00771762	0.148734		rs1726866	7	-0.112774	0.000815342	0.575777
KLRC3	ENSG00000205810	protein_coding	killer cell lectin-like receptor subfamily C, member 3		4.99836	-0.607474	0.00771507	0.148734		-	-	-	-	-
PITHD1	ENSG00000057757	protein_coding	PITH (C-terminal proteasome-interacting domain of thioredoxin-like) domain containing 1		877.674	0.358416	0.00773681	0.148958		rs9424346	1	-0.219344	0.00425278	0.773083
NAPSB	ENSG00000131401	transcribed_unprocessed_pseudogene	napsin B aspartic peptidase, pseudogene		132.047	-0.598047	0.0077557	0.149176		kgp4519725	19	-0.668968	0.00205366	0.695017
PEAK1	ENSG00000173517	protein_coding	pseudopodium-enriched atypical kinase 1		3311.55	0.393562	0.00776759	0.149259		rs8033802	15	0.358403	0.000714362	0.558313
PIAS4	ENSG00000105229	protein_coding	protein inhibitor of activated STAT, 4		294.459	0.188149	0.00777669	0.149288		kgp1408031	19	-0.19768	0.000552145	0.526704
SENP3	ENSG00000161956	protein_coding	SUMO1/sentrin/SMT3 specific peptidase 3		654.329	0.148994	0.00779209	0.149293		rs8069344	17	-0.24779	0.000325635	0.450931
KIF18A	ENSG00000121621	protein_coding	kinesin family member 18A		29.6846	-0.542493	0.00778509	0.149293		-	-	-	-	-
RAB39B	ENSG00000155961	protein_coding	RAB39B, member RAS oncogene family		31.6471	-0.521472	0.00783262	0.149923		-	-	-	-	-
TDRKH	ENSG00000182134	protein_coding	tudor and KH domain containing		256.629	-0.38936	0.00784582	0.15003		kgp11951106	1	0.299462	0.020675	0.889222
CTB-12A172	ENSG00000279161	TEC			3.23638	-0.578678	0.00785797	0.150117		-	-	-	-	-
CDKL1	ENSG00000100490	protein_coding	cyclin-dependent kinase-like 1 (CDC2-related kinase)		29.906	-0.451353	0.00789298	0.150522		rs12588488	14	-0.375019	0.000693063	0.553396
SH3GL1P2	ENSG00000264943	processed_pseudogene	SH3-domain GRB2-like 1 pseudogene 2		3.115	-0.625889	0.00789445	0.150522		kgp3263817	17	-0.100961	0.0119854	0.854045
PARP15	ENSG00000173200	protein_coding	poly (ADP-ribose) polymerase family, member 15		324.004	-0.479069	0.00791867	0.150755		kgp6649950	3	-0.320394	0.00867888	0.833096
AC0936423	ENSG00000237940	lincRNA			6.78462	-0.539256	0.00792196	0.150755		rs764081	2	-0.173656	0.00176535	0.679623
ETV7	ENSG00000010030	protein_coding	ets variant 7		222.677	-0.626829	0.00793036	0.150769		kgp1623411	6	0.774267	0.0113367	0.850088
SOCS1	ENSG00000185338	protein_coding	suppressor of cytokine signaling 1		440.182	-0.597612	0.00797009	0.151378		kgp4983763	16	0.898177	0.00131611	0.640652
INO80D	ENSG00000114933	protein_coding	INO80 complex subunit D		977.153	-0.226239	0.00798847	0.151581		kgp1531781	2	0.123153	0.00305656	0.742373
ANG	ENSG00000214274	protein_coding	angiogenin, ribonuclease, RNase A family, 5		60.2463	0.568349	0.00801955	0.152024		kgp2480227	14	0.602321	0.000810425	0.57541
NGFRAP1	ENSG00000166681	protein_coding	nerve growth factor receptor (TNFRSF16) associated protein 1		716.683	0.553072	0.0080273	0.152025		-	-	-	-	-
AMOTL1	ENSG00000166025	protein_coding	angiomotin like 1		41.2855	0.494203	0.00805016	0.152165		-	-	-	-	-
SDR42E1	ENSG00000184860	protein_coding	short chain dehydrogenase/reductase family 42E, member 1		38.7028	-0.534886	0.0080455	0.152165		-	-	-	-	-
COLEC12	ENSG00000158270	protein_coding	collectin sub-family member 12		633.652	0.590504	0.00814214	0.152627		kgp6346420	18	1.1156	0.000144419	0.329834
ARG1	ENSG00000118520	protein_coding	arginase 1		3.26122	0.565277	0.00814463	0.152627		-	-	-	-	-
AL1334932	ENSG00000233922	lincRNA			27.0531	0.516744	0.00815211	0.152627		kgp3141832	21	0.159614	0.000933093	0.596773
RRS1	ENSG00000179041	protein_coding	RRS1 ribosome biogenesis regulator homolog (S. cerevisiae)		280.308	0.405669	0.00813606	0.152627		kgp12057004	8	0.288757	0.00941876	0.838444
INPP5A	ENSG00000068383	protein_coding	inositol polyphosphate-5-phosphatase, 40kDa		176.869	0.328669	0.00813358	0.152627		rs870552	10	0.220047	0.0014985	0.658803
RP11-488L184	ENSG00000227671	transcribed_unprocessed_pseudogene			912.273	-0.209228	0.00810668	0.152627		rs3806265	1	0.161137	0.00223917	0.706923
UVRAG	ENSG00000198382	protein_coding	UV radiation resistance associated		587.465	-0.250209	0.00808989	0.152627		kgp12213210	11	-0.11404	0.0183488	0.882407
RP13-554M152	ENSG00000279700	TEC			10.9211	-0.447563	0.00809193	0.152627		-	-	-	-	-
RP4-548D193	ENSG00000272661	antisense			5.66021	-0.486993	0.00811561	0.152627		rs4725960	7	-0.249485	0.00062852	0.540517
GBP5	ENSG00000154451	protein_coding	guanylate binding protein 5		12102.6	-0.630336	0.00814771	0.152627		kgp12016889	1	1.25453	0.00481408	0.7833
RP11-356N12	ENSG00000226822	lincRNA			12.0589	0.58434	0.00820619	0.153058		rs1619485	1	-0.683006	2.81912e-05	0.139411
KLHL21	ENSG00000162413	protein_coding	kelch-like family member 21		1275.69	0.411317	0.00818802	0.153058		rs4845793	1	-0.342005	0.00101055	0.609306
ZNF622	ENSG00000173545	protein_coding	zinc finger protein 622		673.377	0.242251	0.00820296	0.153058		rs1025327	5	-0.196797	0.000831374	0.579696
OSBPL7	ENSG00000006025	protein_coding	oxysterol binding protein-like 7		67.9037	-0.358773	0.00819714	0.153058		kgp4510682	17	0.284951	0.00482957	0.783685
CD7	ENSG00000173762	protein_coding	CD7 molecule		168.548	-0.545627	0.0082555	0.153832		kgp8925331	17	0.955502	0.00297702	0.739671
GAREM	ENSG00000141441	protein_coding	GRB2 associated, regulator of MAPK1		9.46787	-0.58647	0.00826379	0.153841		-	-	-	-	-
POR	ENSG00000127948	protein_coding	P450 (cytochrome) oxidoreductase		1319.98	0.360598	0.00828586	0.153961		kgp2495378	7	0.406436	0.00190028	0.687793
ZNF721	ENSG00000182903	protein_coding	zinc finger protein 721		399.648	-0.213044	0.00828092	0.153961		rs4690339	4	-0.228625	0.00126024	0.634972
ZNF287	ENSG00000141040	protein_coding	zinc finger protein 287		29.6083	-0.386139	0.00829488	0.153983		rs7210224	17	-0.214361	0.0118587	0.85338
ANKRD13A	ENSG00000076513	protein_coding	ankyrin repeat domain 13A		1731.46	-0.313018	0.0083076	0.154074		rs7304243	12	0.170534	0.0116891	0.852586
DNTTIP2	ENSG00000067334	protein_coding	deoxynucleotidyltransferase, terminal, interacting protein 2		2125.07	0.305988	0.00836665	0.154297		rs11165065	1	-0.279806	0.00430323	0.773592
TBC1D13	ENSG00000107021	protein_coding	TBC1 domain family, member 13		581.24	0.231953	0.00836552	0.154297		rs10819321	9	-0.229013	0.00362631	0.757782
KIAA0586	ENSG00000100578	protein_coding	KIAA0586		307.635	-0.273343	0.00833087	0.154297		rs856377	14	0.282971	0.000581604	0.533103
MSLN	ENSG00000102854	protein_coding	mesothelin		1.07382	-0.446227	0.00835123	0.154297		-	-	-	-	-
GIMAP6	ENSG00000133561	protein_coding	GTPase, IMAP family member 6		956.367	-0.525067	0.00836601	0.154297		kgp10415722	7	0.521405	0.00242952	0.716149
CYP2D6	ENSG00000100197	protein_coding	cytochrome P450, family 2, subfamily D, polypeptide 6		8.79569	-0.536704	0.00833681	0.154297		-	-	-	-	-
EIF4E3	ENSG00000163412	protein_coding	eukaryotic translation initiation factor 4E family member 3		1068.58	-0.292273	0.00839536	0.154682		kgp2193922	3	0.313645	5.89508e-05	0.211651
ZNF502	ENSG00000196653	protein_coding	zinc finger protein 502		65.5251	-0.389551	0.00841173	0.154801		kgp9130466	3	0.446058	4.24434e-12	5.66139e-07
CCL13	ENSG00000181374	protein_coding	chemokine (C-C motif) ligand 13		783.635	-0.627187	0.00841756	0.154801		rs3744516	17	-1.42237	0.00310793	0.743584
EPB41L4A	ENSG00000129595	protein_coding	erythrocyte membrane protein band 4.1 like 4A		12.8307	-0.542675	0.00842615	0.154815		-	-	-	-	-
MAML3	ENSG00000196782	protein_coding	mastermind-like 3 (Drosophila)		149.194	0.472329	0.00843568	0.154845		kgp8581768	4	0.246269	0.000819209	0.576212
OLR1	ENSG00000173391	protein_coding	oxidized low density lipoprotein (lectin-like) receptor 1		4024.8	0.521736	0.00848626	0.155245		kgp6012836	12	0.763033	0.00145467	0.655503
WBP5	ENSG00000185222	protein_coding	WW domain binding protein 5		874.897	0.375521	0.00854416	0.155245		-	-	-	-	-
THAP11	ENSG00000168286	protein_coding	THAP domain containing 11		286.565	0.248032	0.00848399	0.155245		rs8045344	16	0.20732	0.000535061	0.524285
DPM3	ENSG00000179085	protein_coding	dolichyl-phosphate mannosyltransferase polypeptide 3		108.864	0.216627	0.00854212	0.155245		rs553016	1	-0.303485	0.00549935	0.793502
GDPD5	ENSG00000158555	protein_coding	glycerophosphodiester phosphodiesterase domain containing 5		247.194	-0.364664	0.00849262	0.155245		rs17749447	11	0.453407	0.000723335	0.559636
EFCAB8	ENSG00000215529	protein_coding	EF-hand calcium binding domain 8		5.89783	-0.489501	0.00853079	0.155245		-	-	-	-	-
AZIN2	ENSG00000142920	protein_coding	antizyme inhibitor 2		17.7333	-0.505344	0.00850127	0.155245		-	-	-	-	-
HOPX	ENSG00000171476	protein_coding	HOP homeobox		76.041	-0.541317	0.0085154	0.155245		kgp6975179	4	-0.617697	0.000941286	0.597835
AC10933310	ENSG00000227495	antisense			3.39269	-0.55017	0.00851442	0.155245		rs8074645	17	0.192694	0.00152223	0.660135
LINC01388	ENSG00000231808	lincRNA	long intergenic non-protein coding RNA 1388		2.38211	-0.618518	0.00849888	0.155245		kgp11715887	9	0.425158	7.91634e-06	0.0638727
TNS4	ENSG00000131746	protein_coding	tensin 4		3.01888	-0.623424	0.00853652	0.155245		-	-	-	-	-
LINC00656	ENSG00000233746	lincRNA	long intergenic non-protein coding RNA 656		1.09855	0.621423	0.00860038	0.155407		-	-	-	-	-
SPTLC2	ENSG00000100596	protein_coding	serine palmitoyltransferase, long chain base subunit 2		992.236	-0.427382	0.0085958	0.155407		rs10140793	14	0.281819	0.000980486	0.604946
ANKRD13B	ENSG00000198720	protein_coding	ankyrin repeat domain 13B		9.06676	-0.520076	0.00857248	0.155407		-	-	-	-	-
RP1-102E2410	ENSG00000276718	antisense			6.89864	-0.52589	0.00856243	0.155407		-	-	-	-	-
CMYA5	ENSG00000164309	protein_coding	cardiomyopathy associated 5		16.8474	-0.572008	0.0085892	0.155407		-	-	-	-	-
RP11-223C241	ENSG00000249806	lincRNA			1.35627	-0.625465	0.00857677	0.155407		kgp4499716	4	0.182654	0.00395717	0.765901
TRAV12-2	ENSG00000211789	TR_V_gene	T cell receptor alpha variable 12-2		7.90756	-0.576402	0.00865915	0.156325		kgp589975	14	-0.425103	0.000827832	0.578191
RP11-428G55	ENSG00000255760	lincRNA			4.49948	-0.617026	0.00866772	0.156336		kgp8330284	12	-0.271352	0.00291543	0.737385
EPS8	ENSG00000151491	protein_coding	epidermal growth factor receptor pathway substrate 8		497.707	0.544924	0.00869906	0.156642		rs10744128	12	-0.604721	0.000539658	0.524481
TMEM236	ENSG00000148483	protein_coding	transmembrane protein 236		203.576	-0.567646	0.00870055	0.156642		rs11254660	10	-0.681101	1.57411e-05	0.097326
PKD2L1	ENSG00000107593	protein_coding	polycystic kidney disease 2-like 1		15.6294	0.572298	0.00873	0.15671		rs12218075	10	0.616964	0.000675759	0.550963
HEBP2	ENSG00000051620	protein_coding	heme binding protein 2		372.965	0.419043	0.00872362	0.15671		rs1022501	6	0.381733	0.000486003	0.510616
RP11-231C144	ENSG00000169203	protein_coding	Uncharacterized protein {ECO:0000313|Ensembl:ENSP00000449873}		381.454	-0.408032	0.0087242	0.15671		rs4787643	16	0.354046	0.00146679	0.655817
ZC3H12B	ENSG00000102053	protein_coding	zinc finger CCCH-type containing 12B		7.96074	-0.539851	0.00873617	0.15671		-	-	-	-	-
CHDH	ENSG00000016391	protein_coding	choline dehydrogenase		4.3915	-0.578713	0.00875325	0.156874		-	-	-	-	-
CTD-2047H164	ENSG00000263069	antisense			1.4157	0.627179	0.00876737	0.156917		-	-	-	-	-
ST18	ENSG00000147488	protein_coding	suppression of tumorigenicity 18, zinc finger		257.996	0.547671	0.00877203	0.156917		kgp9139512	8	0.948431	4.3303e-05	0.178016
ZNF789	ENSG00000198556	protein_coding	zinc finger protein 789		211.852	-0.27095	0.0087796	0.156917		rs6944766	7	-0.24215	0.00221468	0.705787
EIF4G2	ENSG00000110321	protein_coding	eukaryotic translation initiation factor 4 gamma, 2		29019.7	0.152073	0.00879229	0.157002		rs1394118	11	-0.147037	0.00471642	0.78133
UBIAD1	ENSG00000120942	protein_coding	UbiA prenyltransferase domain containing 1		360.089	0.192821	0.00880853	0.157149		kgp3131201	1	0.136985	0.00162657	0.668809
TRIM67	ENSG00000119283	protein_coding	tripartite motif containing 67		1.79097	0.625605	0.00882225	0.157252		-	-	-	-	-
SERINC2	ENSG00000168528	protein_coding	serine incorporator 2		325.442	0.522543	0.00884157	0.157266		rs2506967	1	0.427996	0.00174057	0.678066
RFX7	ENSG00000181827	protein_coding	regulatory factor X, 7		397.798	-0.25123	0.00884963	0.157266		rs12440680	15	0.182953	0.00166389	0.672661
TAPBP	ENSG00000231925	protein_coding	TAP binding protein (tapasin)		6900.2	-0.325787	0.00886611	0.157266		rs3828840	6	0.294124	0.000764496	0.567809
KIAA0513	ENSG00000135709	protein_coding	KIAA0513		1173.82	-0.419562	0.00887099	0.157266		kgp12099910	16	-0.364133	0.000220505	0.395397
RP11-477D192	ENSG00000235381	antisense			9.31305	-0.46473	0.00886144	0.157266		kgp7069176	6	0.0806018	0.00115125	0.621573
MDK	ENSG00000110492	protein_coding	midkine (neurite growth-promoting factor 2)		43.7837	-0.574603	0.00884951	0.157266		rs7106761	11	0.605978	0.0091263	0.836652
NEFH	ENSG00000100285	protein_coding	neurofilament, heavy polypeptide		165.68	-0.44421	0.00889665	0.157579		rs165734	22	0.349435	0.00341695	0.751265
PLD1	ENSG00000075651	protein_coding	phospholipase D1, phosphatidylcholine-specific		945.298	0.33278	0.0089179	0.157672		rs902952	3	-0.43449	0.000474158	0.507131
HLA-DPB1	ENSG00000223865	protein_coding	major histocompatibility complex, class II, DP beta 1		9547.42	-0.578788	0.00891191	0.157672		kgp6963618	6	-0.914152	0.00176536	0.679623
IFITM1	ENSG00000185885	protein_coding	interferon induced transmembrane protein 1		556.86	-0.58461	0.00895372	0.158164		kgp12501418	11	1.04676	7.77568e-05	0.246749
PRKG2	ENSG00000138669	protein_coding	protein kinase, cGMP-dependent, type II		4.34386	-0.535574	0.00897068	0.158321		-	-	-	-	-
B9D2	ENSG00000123810	protein_coding	B9 protein domain 2		71.7056	0.310241	0.00899614	0.158491		rs1946612	19	0.213776	0.00563515	0.795879
KIF7	ENSG00000166813	protein_coding	kinesin family member 7		5.45378	-0.60172	0.00899637	0.158491		-	-	-	-	-
RRP1	ENSG00000160214	protein_coding	ribosomal RNA processing 1		695.41	0.346927	0.00902508	0.158854		rs13050924	21	0.266054	0.000232878	0.402728
ITGA9	ENSG00000144668	protein_coding	integrin, alpha 9		131.433	0.593582	0.00904802	0.158974		-	-	-	-	-
ZNF726	ENSG00000213967	protein_coding	zinc finger protein 726		14.6852	-0.472512	0.00904717	0.158974		-	-	-	-	-
UBA52	ENSG00000221983	protein_coding	ubiquitin A-52 residue ribosomal protein fusion product 1		5535.96	0.168682	0.00906926	0.159063		rs10422926	19	0.0932266	0.00112551	0.619634
ISG20	ENSG00000172183	protein_coding	interferon stimulated exonuclease gene 20kDa		545.156	-0.599479	0.00906669	0.159063		rs16943244	15	-1.08759	0.000110542	0.292655
LLPH	ENSG00000139233	protein_coding	LLP homolog, long-term synaptic facilitation (Aplysia)		714.617	0.178883	0.00909114	0.159132		rs1566318	12	0.123896	0.00582338	0.799141
UBASH3A	ENSG00000160185	protein_coding	ubiquitin associated and SH3 domain containing A		70.6108	-0.535217	0.00909481	0.159132		kgp5700471	21	0.405191	0.000986816	0.60558
MTTP	ENSG00000138823	protein_coding	microsomal triglyceride transfer protein		1.19417	-0.618675	0.00909743	0.159132		-	-	-	-	-
PATL2	ENSG00000229474	protein_coding	protein associated with topoisomerase II homolog 2 (yeast)		94.3965	-0.467414	0.00911026	0.159215		rs2663993	15	-0.275267	0.0106404	0.847837
PON2	ENSG00000105854	protein_coding	paraoxonase 2		441.737	0.399373	0.00913175	0.159315		kgp1668230	7	0.269162	0.0102198	0.844784
SNX20	ENSG00000167208	protein_coding	sorting nexin 20		1059.77	-0.407748	0.00913215	0.159315		rs4785345	16	0.429237	0.00115194	0.62162
CALCOCO2	ENSG00000136436	protein_coding	calcium binding and coiled-coil domain 2		2166.27	-0.424052	0.00915454	0.159564		rs1035050	17	-0.24861	0.00953444	0.839691
HS6ST1	ENSG00000136720	protein_coding	heparan sulfate 6-O-sulfotransferase 1		707.011	0.352655	0.00917826	0.159695		kgp3866777	2	-0.308169	0.00165146	0.671205
KPNA6	ENSG00000025800	protein_coding	karyopherin alpha 6 (importin alpha 7)		1598.86	0.103017	0.00917606	0.159695		kgp6648185	1	-0.0680356	0.0322168	0.910056
RCAN1	ENSG00000159200	protein_coding	regulator of calcineurin 1		4833.63	0.505039	0.00920198	0.159967		rs9984732	21	-0.55276	0.00514967	0.787921
UQCC3	ENSG00000204922	protein_coding	ubiquinol-cytochrome c reductase complex assembly factor 3		67.981	0.272181	0.00921201	0.16		rs10750999	11	-0.148728	0.00436421	0.774922
RP11-573G66	ENSG00000261671	lincRNA			1.10616	-0.609536	0.00922198	0.160032		kgp1677409	10	0.182333	0.00102276	0.61153
CSNK1G3	ENSG00000151292	protein_coding	casein kinase 1, gamma 3		519.244	-0.285135	0.00923459	0.16011		rs153880	5	0.164248	0.0038122	0.762783
NTRK2	ENSG00000148053	protein_coding	neurotrophic tyrosine kinase, receptor, type 2		2.76377	-0.619765	0.00927679	0.1607		-	-	-	-	-
PSMA4	ENSG00000041357	protein_coding	proteasome (prosome, macropain) subunit, alpha type, 4		2524.41	-0.315587	0.00929535	0.16088		rs997285	15	-0.18679	0.00349857	0.75417
ABHD6	ENSG00000163686	protein_coding	abhydrolase domain containing 6		361.689	0.318661	0.00930793	0.160956		rs10510805	3	0.2775	0.000668533	0.549373
DTHD1	ENSG00000197057	protein_coding	death domain containing 1		12.8342	-0.568493	0.00932612	0.161129		-	-	-	-	-
NIPAL4	ENSG00000172548	protein_coding	NIPA-like domain containing 4		592.196	0.619698	0.00936361	0.161386		rs4704742	5	-1.43309	4.54732e-05	0.183213
RP11-44F141	ENSG00000260078	transcribed_unprocessed_pseudogene			1.07006	0.596904	0.00935734	0.161386		-	-	-	-	-
LSM12	ENSG00000161654	protein_coding	LSM12 homolog (S. cerevisiae)		893.221	0.121571	0.00936558	0.161386		kgp5071891	17	-0.104823	0.00651337	0.810031
CTD-2516F102	ENSG00000251364	antisense			90.3004	0.574436	0.00942208	0.161825		rs12575833	11	1.10777	7.23449e-06	0.0598558
FAM171B	ENSG00000144369	protein_coding	family with sequence similarity 171, member B		14.632	0.497377	0.00943801	0.161825		-	-	-	-	-
HSD17B8	ENSG00000204228	protein_coding	hydroxysteroid (17-beta) dehydrogenase 8		49.0287	0.354408	0.00944032	0.161825		rs454748	6	-0.217709	0.00123406	0.630733
PRCC	ENSG00000143294	protein_coding	papillary renal cell carcinoma (translocation-associated)		820.141	0.178113	0.00942611	0.161825		rs4661210	1	-0.181695	0.000355149	0.462438
KARS	ENSG00000065427	protein_coding	lysyl-tRNA synthetase		2855.23	-0.30135	0.0094159	0.161825		kgp8358986	16	-0.213816	0.00234325	0.710722
MOV10	ENSG00000155363	protein_coding	Mov10 RISC complex RNA helicase		1279.07	-0.378813	0.00942289	0.161825		kgp22774133	1	0.382192	0.00702481	0.8165
RP11-326C32	ENSG00000255026	antisense			15.399	-0.542587	0.00948779	0.162497		kgp12563865	11	0.687504	0.00139375	0.649197
CYP7B1	ENSG00000172817	protein_coding	cytochrome P450, family 7, subfamily B, polypeptide 1		63.8042	0.55744	0.00956574	0.162654		rs1520929	8	-0.413882	0.00396	0.766143
CD9	ENSG00000010278	protein_coding	CD9 molecule		8220.17	0.465293	0.00953204	0.162654		rs4764521	12	-0.619766	0.00204816	0.6948
KLF16	ENSG00000129911	protein_coding	Kruppel-like factor 16		468.808	0.345389	0.0095713	0.162654		rs740423	19	0.407334	0.00232817	0.710575
AP4M1	ENSG00000221838	protein_coding	adaptor-related protein complex 4, mu 1 subunit		136.712	0.261718	0.0095465	0.162654		rs2075668	7	-0.194674	0.000514951	0.518595
MAP3K14-AS1	ENSG00000267278	antisense	MAP3K14 antisense RNA 1		16.1874	-0.459899	0.00954949	0.162654		rs4792886	17	-0.350501	0.0160335	0.874805
NKG7	ENSG00000105374	protein_coding	natural killer cell granule protein 7		212.392	-0.569588	0.0095162	0.162654		rs8099997	19	-0.864426	0.000219996	0.395072
SLC16A14	ENSG00000163053	protein_coding	solute carrier family 16, member 14		4.27244	-0.588217	0.00956515	0.162654		-	-	-	-	-
KIR2DL3	ENSG00000243772	protein_coding	killer cell immunoglobulin-like receptor, two domains, long cytoplasmic tail, 3		14.2221	-0.596049	0.00954772	0.162654		-	-	-	-	-
INGX	ENSG00000243468	transcribed_processed_pseudogene	inhibitor of growth family, X-linked, pseudogene		1.37722	-0.601815	0.00955596	0.162654		-	-	-	-	-
FCRL3	ENSG00000160856	protein_coding	Fc receptor-like 3		197.618	-0.568297	0.009613	0.163082		rs11264581	1	-0.701271	0.000678246	0.552143
STC2	ENSG00000113739	protein_coding	stanniocalcin 2		3.5627	-0.612943	0.00961022	0.163082		-	-	-	-	-
CTD-2006K231	ENSG00000261222	lincRNA			8.33102	0.577986	0.00972967	0.163935		rs9902865	17	0.525113	0.000245906	0.410087
RP11-317P154	ENSG00000261504	lincRNA			5.97687	0.528207	0.00967921	0.163935		rs266539	1	0.125755	0.00950163	0.83917
TTLL4	ENSG00000135912	protein_coding	tubulin tyrosine ligase-like family member 4		1329.96	0.383378	0.00971578	0.163935		kgp302445	2	-0.269296	0.0129413	0.859253
TOLLIP	ENSG00000078902	protein_coding	toll interacting protein		2216.6	0.271106	0.00972996	0.163935		rs7125627	11	-0.234413	0.000583134	0.533535
MBNL2	ENSG00000139793	protein_coding	muscleblind-like splicing regulator 2		286.356	-0.333027	0.00971026	0.163935		rs2772350	13	0.300826	0.000616706	0.539259
PCED1B	ENSG00000179715	protein_coding	PC-esterase domain containing 1B		124.569	-0.492937	0.00974657	0.163935		rs2276454	12	-0.392909	0.000866238	0.586017
RP11-800A183	ENSG00000279077	TEC			4.15359	-0.527325	0.00968044	0.163935		-	-	-	-	-
APOL6	ENSG00000221963	protein_coding	apolipoprotein L, 6		5476.06	-0.528526	0.00969829	0.163935		kgp7015684	22	-0.63896	0.000600718	0.536353
IL15RA	ENSG00000134470	protein_coding	interleukin 15 receptor, alpha		1072.12	-0.529897	0.00974226	0.163935		rs11257103	10	0.700709	0.00186531	0.686213
DOC2GP	ENSG00000231793	unitary_pseudogene	double C2-like domains, gamma, pseudogene		1.68121	-0.613704	0.00969421	0.163935		kgp9762939	11	0.0742059	0.0172123	0.877847
HTRA3	ENSG00000170801	protein_coding	HtrA serine peptidase 3		413.204	0.58956	0.00976411	0.16409		kgp2007047	4	0.838998	0.000298782	0.438793
CTD-2033D152	ENSG00000276107	sense_intronic			8.8949	0.614883	0.00983409	0.164143		-	-	-	-	-
HSPG2	ENSG00000142798	protein_coding	heparan sulfate proteoglycan 2		137.19	0.589171	0.00982326	0.164143		-	-	-	-	-
FGF5	ENSG00000138675	protein_coding	fibroblast growth factor 5		1.82066	0.575401	0.00984227	0.164143		-	-	-	-	-
SMS	ENSG00000102172	protein_coding	spermine synthase		3732.62	0.401203	0.00983633	0.164143		-	-	-	-	-
SUDS3	ENSG00000111707	protein_coding	suppressor of defective silencing 3 homolog (S. cerevisiae)		629.409	0.14499	0.00983082	0.164143		rs11068953	12	-0.112056	0.0100169	0.843659
ZNF611	ENSG00000213020	protein_coding	zinc finger protein 611		262.486	-0.19691	0.00979266	0.164143		kgp9118319	19	-0.337642	0.000505564	0.515562
CD53	ENSG00000143119	protein_coding	CD53 molecule		12179.7	-0.237893	0.00982191	0.164143		kgp12556954	1	0.168424	3.56054e-05	0.159327
CTC-479C512	ENSG00000261884	protein_coding	Uncharacterized protein {ECO:0000313|Ensembl:ENSP00000463376}		199.53	-0.408497	0.00982403	0.164143		kgp268379	16	0.352614	0.0119441	0.853839
HLA-DMB	ENSG00000242574	protein_coding	major histocompatibility complex, class II, DM beta		4770.7	-0.506108	0.00981656	0.164143		kgp6296408	6	0.71996	0.00137031	0.647096
PIH1D1	ENSG00000104872	protein_coding	PIH1 domain containing 1		435.27	0.198219	0.00989347	0.164755		rs1651543	19	0.242957	0.000847992	0.581968
MAMDC4	ENSG00000177943	protein_coding	MAM domain containing 4		84.7205	-0.38595	0.00989567	0.164755		kgp4365743	9	-0.213766	0.00310608	0.743584
SLC8A1-AS1	ENSG00000227028	antisense	SLC8A1 antisense RNA 1		1.9191	-0.59379	0.00992805	0.165154		rs7591326	2	-0.143297	0.00238674	0.714403
PRLR	ENSG00000113494	protein_coding	prolactin receptor		48.5334	0.476482	0.00997243	0.165396		-	-	-	-	-
C17orf62	ENSG00000178927	protein_coding	chromosome 17 open reading frame 62		1562.03	-0.290252	0.0100022	0.165396		kgp10661784	17	-0.338532	0.00122854	0.630379
AGAP2	ENSG00000135439	protein_coding	ArfGAP with GTPase domain, ankyrin repeat and PH domain 2		265.392	-0.384199	0.00998513	0.165396		kgp1763764	12	-0.203686	0.019206	0.884906
CD47	ENSG00000196776	protein_coding	CD47 molecule		3858.14	-0.402307	0.00998548	0.165396		rs623738	3	0.321077	0.00334334	0.749169
EIF3EP1	ENSG00000234882	processed_pseudogene	eukaryotic translation initiation factor 3, subunit E pseudogene 1		5.97164	-0.528459	0.0100014	0.165396		kgp4681881	6	-0.210546	0.00564749	0.796124
RP11-283G65	ENSG00000255750	antisense			4.77017	-0.586909	0.0100097	0.165396		rs16930371	12	0.3943	0.00257299	0.724514
KRT81	ENSG00000205426	protein_coding	keratin 81		4.34862	-0.598222	0.0100003	0.165396		-	-	-	-	-
CTD-2135D72	ENSG00000262732	antisense			5.5634	-0.608028	0.0100046	0.165396		-	-	-	-	-
GADD45GIP1	ENSG00000179271	protein_coding	growth arrest and DNA-damage-inducible, gamma interacting protein 1		533.906	0.214255	0.0100665	0.165778		kgp1440377	19	-0.150232	0.0136846	0.863875
CHMP5	ENSG00000086065	protein_coding	charged multivesicular body protein 5		1876.22	-0.26456	0.010049	0.165778		rs12555433	9	-0.233129	0.00380822	0.762783
RP11-34P1316	ENSG00000269981	processed_pseudogene			44.1523	-0.503428	0.0100555	0.165778		rs2298217	1	0.582185	0.0138149	0.864417
RP11-700A241	ENSG00000279742	TEC			1.84218	-0.570611	0.0100583	0.165778		-	-	-	-	-
GNG4	ENSG00000168243	protein_coding	guanine nucleotide binding protein (G protein), gamma 4		5.82226	-0.580655	0.0100788	0.165841		-	-	-	-	-
HS3ST2	ENSG00000122254	protein_coding	heparan sulfate (glucosamine) 3-O-sulfotransferase 2		15.4594	0.610393	0.010098	0.166018		-	-	-	-	-
MYO10	ENSG00000145555	protein_coding	myosin X		1198.14	0.488257	0.0101222	0.166278		kgp5079365	5	-0.5701	0.0060454	0.80304
TREM1	ENSG00000124731	protein_coding	triggering receptor expressed on myeloid cells 1		558.297	0.570838	0.0101823	0.166792		rs7764771	6	-0.852483	0.0126373	0.857822
UBXN6	ENSG00000167671	protein_coding	UBX domain protein 6		1889.4	0.22886	0.0101874	0.166792		rs243372	19	-0.163501	0.00149048	0.658147
ASMTL-AS1	ENSG00000236017	antisense	ASMTL antisense RNA 1		46.4681	-0.412982	0.0101806	0.166792		-	-	-	-	-
CCDC102A	ENSG00000135736	protein_coding	coiled-coil domain containing 102A		15.2854	-0.553868	0.0101673	0.166792		-	-	-	-	-
IER3	ENSG00000137331	protein_coding	immediate early response 3		9205.05	0.460112	0.0102322	0.167387		rs3869095	6	-0.511984	0.00462599	0.779367
GID4	ENSG00000141034	protein_coding	GID complex subunit 4		275.43	0.307812	0.0102631	0.1674		rs242253	17	-0.252682	0.0246403	0.897348
MRPS24	ENSG00000062582	protein_coding	mitochondrial ribosomal protein S24		398.806	0.219824	0.0102582	0.1674		kgp12150851	7	0.128953	0.0078945	0.824835
CPT1B	ENSG00000205560	protein_coding	carnitine palmitoyltransferase 1B (muscle)		258.82	-0.416866	0.010257	0.1674		kgp22781664	22	0.431904	0.00311378	0.743584
CYBB	ENSG00000165168	protein_coding	cytochrome b-245, beta polypeptide		43651.7	-0.455081	0.0102747	0.1674		-	-	-	-	-
LINC01137	ENSG00000233621	antisense	long intergenic non-protein coding RNA 1137		152.848	-0.484506	0.0102755	0.1674		kgp705303	1	0.557953	0.000597187	0.535588
USP6	ENSG00000129204	protein_coding	ubiquitin specific peptidase 6		7.01986	-0.573309	0.0102844	0.167406		-	-	-	-	-
LINC01426	ENSG00000234380	antisense	long intergenic non-protein coding RNA 1426		9.56415	0.56823	0.0103175	0.167444		rs11701555	21	0.248655	0.00109584	0.61681
B3GALT6	ENSG00000176022	protein_coding	UDP-Gal:betaGal beta 1,3-galactosyltransferase polypeptide 6		526.417	0.346303	0.0103006	0.167444		kgp6527512	1	-0.243402	0.00102981	0.612184
KB-1507C52	ENSG00000253320	antisense			4.55208	-0.525931	0.0103092	0.167444		kgp5137717	8	-0.272315	0.00196153	0.690946
KIF5A	ENSG00000155980	protein_coding	kinesin family member 5A		4.79142	-0.557309	0.0103207	0.167444		-	-	-	-	-
37134	ENSG00000184702	protein_coding	septin 5		9.31405	0.55288	0.0103624	0.167471		-	-	-	-	-
TNFRSF4	ENSG00000186827	protein_coding	tumor necrosis factor receptor superfamily, member 4		468.647	0.485767	0.0103796	0.167471		rs10907192	1	0.78854	0.00523302	0.78962
HGSNAT	ENSG00000165102	protein_coding	heparan-alpha-glucosaminide N-acetyltransferase		2427.06	0.374409	0.0103819	0.167471		rs10087388	8	0.286281	0.00183048	0.684135
FTSJ2	ENSG00000122687	protein_coding	FtsJ RNA methyltransferase homolog 2 (E. coli)		489.579	0.202668	0.0103668	0.167471		rs883444	7	0.318214	0.00124024	0.632085
UBN2	ENSG00000157741	protein_coding	ubinuclein 2		711.821	-0.293315	0.0103443	0.167471		kgp4079825	7	0.150707	0.0023123	0.7098
SNX10	ENSG00000086300	protein_coding	sorting nexin 10		8261.98	-0.469202	0.0103543	0.167471		rs7804262	7	0.405235	0.00524013	0.78984
ESRRB	ENSG00000119715	protein_coding	estrogen-related receptor beta		1.0812	-0.592652	0.0103331	0.167471		-	-	-	-	-
SVIL-AS1	ENSG00000224597	antisense	SVIL antisense RNA 1		721.409	0.28664	0.0104191	0.167795		rs7089591	10	0.309432	4.66046e-05	0.186289
PCBP1	ENSG00000169564	protein_coding	poly(rC) binding protein 1		6082.76	0.131252	0.0104176	0.167795		rs13420242	2	-0.0971638	0.00352837	0.754811
AKAP13	ENSG00000170776	protein_coding	A kinase (PRKA) anchor protein 13		3607.83	-0.255249	0.010453	0.168204		kgp11077005	15	-0.246828	0.000153738	0.339145
VKORC1	ENSG00000167397	protein_coding	vitamin K epoxide reductase complex, subunit 1		1085.71	0.333518	0.0104802	0.168378		rs3925075	16	-0.220897	0.00312533	0.743584
SH3TC1	ENSG00000125089	protein_coding	SH3 domain and tetratricopeptide repeats 1		1589.08	0.31711	0.0104809	0.168378		kgp6150641	4	-0.307138	0.00115886	0.622366
EDN1	ENSG00000078401	protein_coding	endothelin 1		87.7637	-0.569773	0.0104976	0.168509		rs7754760	6	0.544974	0.000268223	0.423162
IL18BP	ENSG00000137496	protein_coding	interleukin 18 binding protein		2955.28	-0.462897	0.0105113	0.168592		kgp643289	11	0.366012	0.0117656	0.853077
PCSK7	ENSG00000160613	protein_coding	proprotein convertase subtilisin/kexin type 7		1456.52	-0.226671	0.0105341	0.16882		rs518547	11	-0.20537	0.0028291	0.734592
AMDHD2	ENSG00000162066	protein_coding	amidohydrolase domain containing 2		609.149	0.313442	0.0105597	0.168969		kgp9504874	16	0.246532	0.0149527	0.869008
P2RY14	ENSG00000174944	protein_coding	purinergic receptor P2Y, G-protein coupled, 14		27.3503	-0.609153	0.0105606	0.168969		-	-	-	-	-
ARHGEF25	ENSG00000240771	protein_coding	Rho guanine nucleotide exchange factor (GEF) 25		1.66443	-0.602792	0.0105774	0.1691		-	-	-	-	-
FKBP9	ENSG00000122642	protein_coding	FK506 binding protein 9, 63 kDa		526.662	0.326444	0.010601	0.169341		rs3109433	7	-0.323632	0.000370294	0.469738
BRK1	ENSG00000254999	protein_coding	BRICK1, SCAR/WAVE actin-nucleating complex subunit		2293.08	0.176186	0.0106159	0.169442		kgp3559401	3	0.138914	0.000141372	0.326429
SMC6	ENSG00000163029	protein_coding	structural maintenance of chromosomes 6		683.578	-0.179331	0.0106301	0.169531		rs12471785	2	0.134911	0.0015672	0.664088
GTF3C2	ENSG00000115207	protein_coding	general transcription factor IIIC, polypeptide 2, beta 110kDa		1213.13	0.154347	0.0106498	0.169707		rs7604720	2	0.172316	0.00202946	0.693909
CCNJL	ENSG00000135083	protein_coding	cyclin J-like		6.3513	-0.585904	0.0107618	0.171354		-	-	-	-	-
BASP1	ENSG00000176788	protein_coding	brain abundant, membrane attached signal protein 1		2155.23	0.409695	0.0107848	0.171529		rs17706248	5	0.464064	0.00153401	0.661018
TBC1D17	ENSG00000104946	protein_coding	TBC1 domain family, member 17		327.301	0.285301	0.010814	0.171529		rs4802517	19	-0.197191	0.00227949	0.708637
RPL23	ENSG00000125691	protein_coding	ribosomal protein L23		6466.58	0.231028	0.0108512	0.171529		kgp6033109	17	0.2813	0.00081623	0.575777
AGPAT2	ENSG00000169692	protein_coding	1-acylglycerol-3-phosphate O-acyltransferase 2		899.422	0.203954	0.0108354	0.171529		rs13290979	9	-0.179223	0.00215459	0.702231
ANGEL2	ENSG00000174606	protein_coding	angel homolog 2 (Drosophila)		520.662	-0.221062	0.010832	0.171529		kgp6568156	1	0.173467	0.000232623	0.402694
TBL1XR1	ENSG00000177565	protein_coding	transducin (beta)-like 1 X-linked receptor 1		1926.21	-0.250851	0.0108182	0.171529		rs1377820	3	-0.231598	0.00143197	0.653891
MTMR8	ENSG00000102043	protein_coding	myotubularin related protein 8		22.6438	-0.368676	0.0108243	0.171529		-	-	-	-	-
PILRB	ENSG00000121716	protein_coding	paired immunoglobin-like type 2 receptor beta		276.14	-0.40367	0.0108437	0.171529		rs11761624	7	0.471022	2.98528e-05	0.143692
GRAP2	ENSG00000100351	protein_coding	GRB2-related adaptor protein 2		135.281	-0.493799	0.0108093	0.171529		kgp7172913	22	0.390989	0.0075275	0.821718
TWIST1	ENSG00000122691	protein_coding	twist family bHLH transcription factor 1		1.20092	0.584612	0.0109111	0.172337		-	-	-	-	-
HCAR2	ENSG00000182782	protein_coding	hydroxycarboxylic acid receptor 2		668.065	-0.499036	0.0109809	0.173162		kgp7837627	12	0.386521	0.0110738	0.84954
CTA-212A21	ENSG00000279805	TEC			28.9333	-0.57294	0.0109801	0.173162		-	-	-	-	-
SBDSP1	ENSG00000225648	transcribed_unprocessed_pseudogene	Shwachman-Bodian-Diamond syndrome pseudogene 1		177.272	0.263708	0.0109944	0.173236		rs941299	7	-0.134029	0.010764	0.848447
KPNB1	ENSG00000108424	protein_coding	karyopherin (importin) beta 1		6988.8	-0.21939	0.0110245	0.173546		kgp22771167	17	0.203978	0.00924991	0.837086
RASA2	ENSG00000155903	protein_coding	RAS p21 protein activator 2		652.794	-0.265691	0.0110405	0.173546		kgp10330501	3	0.16635	0.00231453	0.7098
MUC1	ENSG00000185499	protein_coding	mucin 1, cell surface associated		55.9222	-0.573668	0.0110351	0.173546		kgp6105722	1	0.51092	0.00313029	0.743584
ABLIM3	ENSG00000173210	protein_coding	actin binding LIM protein family, member 3		224.435	0.452328	0.0110684	0.173847		kgp2211884	5	0.319361	0.0144765	0.867563
RP11-539L102	ENSG00000246526	lincRNA			11.2021	-0.537558	0.011086	0.173985		rs757239	4	0.203925	0.00330451	0.748535
RP5-1107A174	ENSG00000263120	sense_intronic			2.69548	-0.593736	0.0111044	0.174134		-	-	-	-	-
NRP2	ENSG00000118257	protein_coding	neuropilin 2		8568.89	0.356699	0.0111343	0.174462		rs6727754	2	-0.277128	0.00274271	0.730525
PAIP1P1	ENSG00000233892	processed_pseudogene	poly(A) binding protein interacting protein 1 pseudogene 1		7.3784	-0.470403	0.0111431	0.174462		rs3823363	6	-0.110753	0.00698684	0.815633
MBNL1	ENSG00000152601	protein_coding	muscleblind-like splicing regulator 1		6465.33	-0.319921	0.0111793	0.174891		rs7620292	3	0.28475	0.000178792	0.363686
RP11-384O81	ENSG00000267034	lincRNA			602.831	0.504174	0.0111913	0.17494		kgp3292808	2	-0.474449	0.00664072	0.811634
IL17RB	ENSG00000056736	protein_coding	interleukin 17 receptor B		5.77424	-0.585765	0.0112178	0.175214		-	-	-	-	-
FCER1A	ENSG00000179639	protein_coding	Fc fragment of IgE, high affinity I, receptor for; alpha polypeptide		73.6773	0.569105	0.0112854	0.176131		kgp11745865	1	0.860911	0.000482985	0.509752
MIA3	ENSG00000154305	protein_coding	melanoma inhibitory activity family, member 3		1310.39	-0.349501	0.0113205	0.176481		rs908857	1	0.278466	0.000727738	0.560514
C2orf81	ENSG00000159239	protein_coding	chromosome 2 open reading frame 81		8.15476	-0.518412	0.0113257	0.176481		-	-	-	-	-
NR2C2AP	ENSG00000184162	protein_coding	nuclear receptor 2C2-associated protein		141.328	0.282888	0.0113422	0.176597		rs258578	19	0.169609	0.00879624	0.83446
AKR1C3	ENSG00000196139	protein_coding	aldo-keto reductase family 1, member C3		48.6624	0.513302	0.0113642	0.176612		rs3750657	10	-0.424921	0.00130965	0.64015
RPL7AP6	ENSG00000242071	processed_pseudogene	ribosomal protein L7a pseudogene 6		31.102	0.357086	0.0113954	0.176612		kgp1980517	14	0.718923	0.0085185	0.831606
TRIO	ENSG00000038382	protein_coding	trio Rho guanine nucleotide exchange factor		2885.78	0.271897	0.0114466	0.176612		rs744165	5	-0.171998	0.00538488	0.79203
ATG101	ENSG00000123395	protein_coding	autophagy related 101		420.527	0.211065	0.0114325	0.176612		rs679724	12	0.153293	0.000466103	0.505377
RBM4	ENSG00000173933	protein_coding	RNA binding motif protein 4		1134.6	0.208379	0.0114265	0.176612		kgp3448291	11	-0.128224	0.0129153	0.859227
VPS54	ENSG00000143952	protein_coding	vacuolar protein sorting 54 homolog (S. cerevisiae)		673.686	-0.20853	0.0113702	0.176612		kgp14242114	2	0.162279	0.00937932	0.838057
MYCBP2	ENSG00000005810	protein_coding	MYC binding protein 2, E3 ubiquitin protein ligase		3421.38	-0.241315	0.0113746	0.176612		rs7317149	13	-0.218498	0.000758329	0.566283
PRRG4	ENSG00000135378	protein_coding	proline rich Gla (G-carboxyglutamic acid) 4 (transmembrane)		273.891	-0.476172	0.0114508	0.176612		kgp3724079	11	0.520251	0.000242857	0.408546
IRF1	ENSG00000125347	protein_coding	interferon regulatory factor 1		7732.74	-0.489655	0.0114468	0.176612		rs162881	5	0.65236	0.00332021	0.748618
AC0209511	ENSG00000278897	TEC			9.3752	-0.49722	0.0113974	0.176612		-	-	-	-	-
TNFSF11	ENSG00000120659	protein_coding	tumor necrosis factor (ligand) superfamily, member 11		8.46218	-0.583739	0.0114419	0.176612		-	-	-	-	-
BCL2L14	ENSG00000121380	protein_coding	BCL2-like 14 (apoptosis facilitator)		32.8213	-0.600694	0.0113951	0.176612		-	-	-	-	-
TPST2	ENSG00000128294	protein_coding	tyrosylprotein sulfotransferase 2		1357.83	0.304024	0.0114837	0.176843		kgp3564619	22	-0.178024	0.00187515	0.686745
PTPRC	ENSG00000081237	protein_coding	protein tyrosine phosphatase, receptor type, C		15464.7	-0.359978	0.0114768	0.176843		kgp15341061	1	0.270642	0.00289175	0.736968
RP11-175P192	ENSG00000236297	transcribed_processed_pseudogene			2.11043	-0.576819	0.011503	0.177003		kgp9989439	3	0.13737	0.0035518	0.754941
ADORA2A-AS1	ENSG00000178803	antisense	ADORA2A antisense RNA 1		7.94794	0.598291	0.0115453	0.177376		rs9612907	22	0.348302	3.19375e-06	0.0345807
LONP2	ENSG00000102910	protein_coding	lon peptidase 2, peroxisomal		1542.77	-0.125387	0.0115398	0.177376		rs649510	16	0.123183	0.0195323	0.885703
DOCK9	ENSG00000088387	protein_coding	dedicator of cytokinesis 9		200.485	-0.509374	0.0115653	0.177545		rs9517725	13	-0.882767	0.000112468	0.295282
SKAP1	ENSG00000141293	protein_coding	src kinase associated phosphoprotein 1		75.5418	-0.508723	0.0115756	0.177564		kgp6278033	17	0.56198	0.00435817	0.774922
TRABD2A	ENSG00000186854	protein_coding	TraB domain containing 2A		91.635	-0.479599	0.011597	0.177616		kgp12029311	2	-0.39413	0.000184428	0.369463
RAB9B	ENSG00000123570	protein_coding	RAB9B, member RAS oncogene family		5.09833	-0.494213	0.0115947	0.177616		-	-	-	-	-
GCC2	ENSG00000135968	protein_coding	GRIP and coiled-coil domain containing 2		1153.9	-0.254018	0.0116452	0.178215		kgp7531417	2	-0.215024	0.000191206	0.373603
GNLY	ENSG00000115523	protein_coding	granulysin		500.363	-0.570177	0.011675	0.178533		rs17026595	2	1.44164	7.69085e-05	0.245851
GORASP2	ENSG00000115806	protein_coding	golgi reassembly stacking protein 2, 55kDa		1654.97	0.16269	0.0117124	0.178939		kgp8172642	2	-0.0978153	0.00154079	0.661736
CTDP1	ENSG00000060069	protein_coding	CTD (carboxy-terminal domain, RNA polymerase II, polypeptide A) phosphatase, subunit 1		616.559	0.162626	0.0117197	0.178939		kgp10714280	18	-0.123593	0.000132459	0.317434
RP11-307C181	ENSG00000272950	antisense			2.9031	-0.542091	0.0117684	0.179544		kgp8676946	7	0.261538	0.000587848	0.534544
UBL5	ENSG00000198258	protein_coding	ubiquitin-like 5		1233.38	0.180277	0.0117807	0.179591		rs12461154	19	-0.176882	0.00211559	0.69929
KHK	ENSG00000138030	protein_coding	ketohexokinase (fructokinase)		48.2466	0.348127	0.0118434	0.179617		rs3791731	2	-0.260454	0.0402022	0.92052
NKTR	ENSG00000114857	protein_coding	natural killer cell triggering receptor		2061.62	-0.223539	0.0118517	0.179617		kgp9337477	3	-0.194185	0.000532849	0.523758
TBX19	ENSG00000143178	protein_coding	T-box 19		66.7199	-0.394524	0.0118173	0.179617		kgp2741730	1	0.25825	0.0121066	0.854838
SLA	ENSG00000155926	protein_coding	Src-like-adaptor		1862.21	-0.405614	0.0118408	0.179617		rs11992377	8	0.443259	0.00103499	0.612391
PPM1K	ENSG00000163644	protein_coding	protein phosphatase, Mg2+/Mn2+ dependent, 1K		601.295	-0.512465	0.0118553	0.179617		kgp10576938	4	-0.481175	0.00348074	0.753944
CFL1P1	ENSG00000223820	transcribed_unprocessed_pseudogene	cofilin 1 (non-muscle) pseudogene 1		13.0215	-0.534899	0.0118503	0.179617		rs1058798	10	0.515551	0.000258979	0.417697
ATP2A1-AS1	ENSG00000260442	antisense	ATP2A1 antisense RNA 1		1.22437	-0.594788	0.0118327	0.179617		kgp9784024	16	-0.221118	0.000122574	0.306886
ANKRD22	ENSG00000152766	protein_coding	ankyrin repeat domain 22		525.606	-0.597028	0.0117986	0.179617		kgp9340911	10	1.07098	0.00576168	0.797911
TMEM51	ENSG00000171729	protein_coding	transmembrane protein 51		1322.42	0.375773	0.0118982	0.179925		kgp10961863	1	-0.324874	0.000448768	0.49892
SOCS5	ENSG00000171150	protein_coding	suppressor of cytokine signaling 5		396.635	0.19325	0.011903	0.179925		kgp11790791	2	0.192564	4.23774e-05	0.175828
RP11-403I138	ENSG00000272419	processed_transcript			158.598	-0.408498	0.011888	0.179925		-	-	-	-	-
MED6	ENSG00000133997	protein_coding	mediator complex subunit 6		446.163	0.162953	0.0119432	0.180256		rs12589785	14	-0.168664	0.0116654	0.852567
TRAV9-2	ENSG00000211793	TR_V_gene	T cell receptor alpha variable 9-2		7.33379	-0.543749	0.0119432	0.180256		rs5742747	14	0.5667	0.000722435	0.559566
RP11-336K2412	ENSG00000273002	antisense			43.1791	-0.343003	0.0119872	0.180643		kgp5462418	1	0.266701	0.000549766	0.526345
PDE4D	ENSG00000113448	protein_coding	phosphodiesterase 4D, cAMP-specific		207.858	-0.482145	0.0119864	0.180643		kgp6342232	5	0.513251	0.000898166	0.591158
INSIG2	ENSG00000125629	protein_coding	insulin induced gene 2		583.468	-0.487738	0.0120071	0.180804		rs4849613	2	0.567482	0.00611454	0.804018
AC1448311	ENSG00000261888	lincRNA			99.2405	0.535451	0.0120293	0.180972		kgp6000258	17	-0.587023	0.000999239	0.60776
ZNF337-AS1	ENSG00000213742	antisense	ZNF337 antisense RNA 1		15.5385	-0.385916	0.0120366	0.180972		kgp5291262	20	0.188695	0.00864634	0.832844
ROMO1	ENSG00000125995	protein_coding	reactive oxygen species modulator 1		321.94	0.241061	0.0120475	0.180997		kgp11168820	20	0.13905	0.0115952	0.851812
IL2RA	ENSG00000134460	protein_coding	interleukin 2 receptor, alpha		782.479	-0.550308	0.0121009	0.181385		rs2026628	10	0.73121	0.00121065	0.62872
ZNF541	ENSG00000118156	protein_coding	zinc finger protein 541		1.6518	-0.590135	0.0120989	0.181385		-	-	-	-	-
HLA-DQA1	ENSG00000196735	protein_coding	major histocompatibility complex, class II, DQ alpha 1		7679.41	-0.598454	0.0120865	0.181385		kgp10685071	6	2.82386	2.16489e-08	0.000682016
SHC3	ENSG00000148082	protein_coding	SHC (Src homology 2 domain containing) transforming protein 3		25.1319	0.58977	0.0121571	0.18195		-	-	-	-	-
PAQR8	ENSG00000170915	protein_coding	progestin and adipoQ receptor family member VIII		284.911	-0.390056	0.012154	0.18195		kgp3532786	6	-0.489469	0.00177005	0.679782
KCNAB2	ENSG00000069424	protein_coding	potassium channel, voltage gated subfamily A regulatory beta subunit 2		5867.67	0.316222	0.012179	0.18214		rs10915352	1	0.262464	0.00146451	0.655712
TDRD9	ENSG00000156414	protein_coding	tudor domain containing 9		205.769	0.544733	0.0122092	0.182162		kgp11323170	14	0.525027	0.0100476	0.843879
TSSC4	ENSG00000184281	protein_coding	tumor suppressing subtransferable candidate 4		376.633	0.229602	0.012236	0.182162		kgp3476754	11	-0.325191	1.51171e-05	0.0956329
ANO8	ENSG00000074855	protein_coding	anoctamin 8		246.369	-0.262004	0.012206	0.182162		rs2547108	19	-0.29567	0.00193696	0.690044
PARP8	ENSG00000151883	protein_coding	poly (ADP-ribose) polymerase family, member 8		674.968	-0.296898	0.0122341	0.182162		kgp12553856	5	0.15181	0.00688903	0.814327
APOL2	ENSG00000128335	protein_coding	apolipoprotein L, 2		2381.8	-0.427852	0.0121985	0.182162		rs2267341	22	0.433515	4.11568e-05	0.172589
TAGAP	ENSG00000164691	protein_coding	T-cell activation RhoGTPase activating protein		856.326	-0.509266	0.0122184	0.182162		rs6455678	6	0.598155	0.00105755	0.614237
RGS16	ENSG00000143333	protein_coding	regulator of G-protein signaling 16		1120.78	0.483267	0.0123144	0.182355		kgp10308774	1	-0.915115	0.00139492	0.64932
BTBD7	ENSG00000011114	protein_coding	BTB (POZ) domain containing 7		1430.82	0.246948	0.0123009	0.182355		kgp3939233	14	0.342547	0.000600567	0.536353
WDR5	ENSG00000196363	protein_coding	WD repeat domain 5		573.68	0.23238	0.0123105	0.182355		kgp265373	9	-0.196468	0.000217487	0.393642
RNF26	ENSG00000173456	protein_coding	ring finger protein 26		420.969	0.176035	0.0123073	0.182355		kgp6787772	11	0.191919	0.00261142	0.726012
SRBD1	ENSG00000068784	protein_coding	S1 RNA binding domain 1		293.422	-0.331907	0.0122757	0.182355		rs2959262	2	0.317682	0.00327329	0.748098
GUCY1B3	ENSG00000061918	protein_coding	guanylate cyclase 1, soluble, beta 3		61.3108	-0.504705	0.012323	0.182355		kgp8096076	4	0.414098	0.00327854	0.748119
PI4KAP1	ENSG00000274602	transcribed_unprocessed_pseudogene	phosphatidylinositol 4-kinase, catalytic, alpha pseudogene 1		263.066	-0.523842	0.0123032	0.182355		-	-	-	-	-
APOL4	ENSG00000100336	protein_coding	apolipoprotein L, 4		349.184	-0.589351	0.0123017	0.182355		kgp3062126	22	1.41556	0.00223097	0.706406
DNAJB12	ENSG00000148719	protein_coding	DnaJ (Hsp40) homolog, subfamily B, member 12		1375.77	0.171878	0.0123364	0.182416		kgp9419600	10	-0.115303	0.00881924	0.834734
AKAP11	ENSG00000023516	protein_coding	A kinase (PRKA) anchor protein 11		1578.59	-0.281995	0.0123653	0.182706		rs17062375	13	-0.380162	0.000810697	0.57541
KCNAB3	ENSG00000170049	protein_coding	potassium channel, voltage gated subfamily A regulatory beta subunit 3		16.8334	-0.41316	0.0123809	0.1828		-	-	-	-	-
SRP54-AS1	ENSG00000258704	processed_transcript	SRP54 antisense RNA 1 (head to head)		6.05586	0.500814	0.0124017	0.182969		kgp2295176	14	0.226122	0.00322261	0.746216
GCLM	ENSG00000023909	protein_coding	glutamate-cysteine ligase, modifier subunit		2191.26	0.441878	0.012453	0.18304		kgp3239590	1	0.659928	0.00379287	0.76249
RPL36	ENSG00000130255	protein_coding	ribosomal protein L36		2247.16	0.194377	0.0124165	0.18304		kgp11283896	19	-0.231141	0.00106408	0.614474
SIDT1	ENSG00000072858	protein_coding	SID1 transmembrane family, member 1		99.7748	-0.489174	0.01245	0.18304		rs9288978	3	-0.678601	0.00015089	0.33736
ITM2A	ENSG00000078596	protein_coding	integral membrane protein 2A		104.672	-0.491695	0.0124395	0.18304		-	-	-	-	-
BUB1	ENSG00000169679	protein_coding	BUB1 mitotic checkpoint serine/threonine kinase		139.615	-0.492715	0.012438	0.18304		kgp3499619	2	0.283134	0.00544757	0.792899
IGHEP2	ENSG00000254017	IG_C_pseudogene	immunoglobulin heavy constant epsilon P2 (pseudogene)		10.7042	-0.551884	0.0124688	0.183136		kgp10559048	9	-0.317793	0.000644425	0.54342
TMCC3	ENSG00000057704	protein_coding	transmembrane and coiled-coil domain family 3		194.044	-0.460668	0.0124854	0.183243		kgp1638477	12	-0.350461	0.00126775	0.635781
LINC00884	ENSG00000233058	antisense	long intergenic non-protein coding RNA 884		43.883	0.423299	0.0125013	0.183339		kgp9378448	3	0.220329	0.00330833	0.748535
RP11-206L102	ENSG00000228327	lincRNA			34.86	-0.400527	0.0125605	0.183934		kgp7731027	1	0.141994	0.0425611	0.922512
CTGLF12P	ENSG00000265018	transcribed_unprocessed_pseudogene	centaurin, gamma-like family, member 12 pseudogene		11.5525	-0.595403	0.0125558	0.183934		-	-	-	-	-
FBLIM1	ENSG00000162458	protein_coding	filamin binding LIM protein 1		11.4975	0.587516	0.0126028	0.184006		-	-	-	-	-
SYNE3	ENSG00000176438	protein_coding	spectrin repeat containing, nuclear envelope family member 3		1048.28	-0.383624	0.0125978	0.184006		rs1956721	14	0.40811	0.000560156	0.528397
TRBV2	ENSG00000226660	TR_V_gene	T cell receptor beta variable 2		8.62413	-0.507905	0.0125753	0.184006		rs7782169	7	-0.379841	0.00139418	0.649214
RP11-39K244	ENSG00000224083	unprocessed_pseudogene			6.54692	-0.556448	0.0125859	0.184006		kgp1710328	9	-0.169463	8.30067e-05	0.254219
HLA-DRA	ENSG00000204287	protein_coding	major histocompatibility complex, class II, DR alpha		58633.7	-0.544148	0.012615	0.184048		rs9500927	6	-0.859456	0.00364078	0.758333
TNFRSF10D	ENSG00000173530	protein_coding	tumor necrosis factor receptor superfamily, member 10d, decoy with truncated death domain		1024.83	0.497295	0.0126527	0.184184		kgp11104127	8	0.504873	0.000399747	0.479359
PARP14	ENSG00000173193	protein_coding	poly (ADP-ribose) polymerase family, member 14		10988.5	-0.481559	0.0126617	0.184184		kgp2517981	3	0.533657	0.0159547	0.874425
NFIX	ENSG00000008441	protein_coding	nuclear factor I/X (CCAAT-binding transcription factor)		77.6572	-0.493837	0.0126473	0.184184		kgp9217405	19	-0.340649	0.00717231	0.817929
RP11-553L62	ENSG00000241490	antisense			7.39974	-0.537873	0.0126497	0.184184		rs9871676	3	0.125397	0.00421867	0.772145
RP11-563J22	ENSG00000215244	lincRNA			13.3991	-0.449847	0.0126734	0.184218		rs4748306	10	0.105723	0.00113595	0.620044
HTRA1	ENSG00000166033	protein_coding	HtrA serine peptidase 1		2598.11	0.50857	0.0127332	0.184563		rs2421130	10	-0.905947	0.00287221	0.736531
SLC27A3	ENSG00000143554	protein_coding	solute carrier family 27 (fatty acid transporter), member 3		685.176	-0.448312	0.0127501	0.184563		kgp7416554	1	0.464858	0.00224785	0.707588
SP110	ENSG00000135899	protein_coding	SP110 nuclear body protein		952.007	-0.465767	0.0127392	0.184563		kgp3013252	2	-0.680557	0.00394623	0.765596
RP5-839B48	ENSG00000243961	lincRNA			2.2607	-0.514609	0.0127093	0.184563		-	-	-	-	-
IL12RB1	ENSG00000096996	protein_coding	interleukin 12 receptor, beta 1		391.374	-0.546291	0.0127472	0.184563		kgp10072214	19	-0.725295	0.00150317	0.659277
IL3	ENSG00000164399	protein_coding	interleukin 3		5.16259	-0.561161	0.0127574	0.184563		-	-	-	-	-
CTD-2576D54	ENSG00000261448	antisense			1.54155	-0.590766	0.0127627	0.184563		kgp11837712	16	0.145838	0.00453905	0.777146
LPPR3	ENSG00000129951	protein_coding	Lipid phosphate phosphatase-related protein type 3		6.58924	0.582741	0.0127839	0.184733		-	-	-	-	-
LRG1	ENSG00000171236	protein_coding	leucine-rich alpha-2-glycoprotein 1		51.2574	0.53171	0.012799	0.184817		kgp5780899	19	0.328518	0.000284382	0.433584
PLCL2	ENSG00000154822	protein_coding	phospholipase C-like 2		431.528	-0.285326	0.0128444	0.185285		kgp11682206	3	0.16757	0.000991716	0.606218
PSMB8	ENSG00000204264	protein_coding	proteasome (prosome, macropain) subunit, beta type, 8		2255.3	-0.448119	0.0128503	0.185285		rs3828840	6	0.470524	0.000903926	0.592089
SH3D21	ENSG00000214193	protein_coding	SH3 domain containing 21		164.601	0.518014	0.0128921	0.185752		kgp12418100	1	-0.644113	0.00736662	0.819279
RP11-597D132	ENSG00000280140	TEC			1.0417	0.588831	0.0129233	0.185929		-	-	-	-	-
THAP4	ENSG00000176946	protein_coding	THAP domain containing 4		382.806	0.245877	0.0129154	0.185929		kgp5732139	2	-0.183962	0.00137807	0.648013
NR1H3	ENSG00000025434	protein_coding	nuclear receptor subfamily 1, group H, member 3		4113.49	-0.369596	0.0129974	0.18686		rs924714	11	-0.416258	0.00667395	0.81217
DKK3	ENSG00000050165	protein_coding	dickkopf WNT signaling pathway inhibitor 3		12.2641	-0.548377	0.0130127	0.186943		-	-	-	-	-
CALML6	ENSG00000169885	protein_coding	calmodulin-like 6		1.92162	-0.55732	0.0130283	0.187031		-	-	-	-	-
TSNAXIP1	ENSG00000102904	protein_coding	translin-associated factor X interacting protein 1		5.55175	-0.477778	0.0130469	0.18716		-	-	-	-	-
LINC01537	ENSG00000227467	lincRNA	long intergenic non-protein coding RNA 1537		4.59368	0.571531	0.0131664	0.187174		-	-	-	-	-
NOB1	ENSG00000141101	protein_coding	NIN1/RPN12 binding protein 1 homolog (S. cerevisiae)		652.318	0.320024	0.0131488	0.187174		rs16970406	16	0.284074	0.00188903	0.687502
CUTA	ENSG00000112514	protein_coding	cutA divalent cation tolerance homolog (E. coli)		715.357	0.243011	0.0131634	0.187174		rs10947479	6	-0.164961	0.000697042	0.553971
SCPEP1	ENSG00000121064	protein_coding	serine carboxypeptidase 1		6537.65	-0.37564	0.0131249	0.187174		kgp827538	17	0.292547	0.00371021	0.759811
ZNF280B	ENSG00000275004	protein_coding	zinc finger protein 280B		20.0057	-0.403645	0.0130861	0.187174		-	-	-	-	-
L3MBTL3	ENSG00000198945	protein_coding	l(3)mbt-like 3 (Drosophila)		126.48	-0.406824	0.0131211	0.187174		rs9483083	6	0.430728	0.000901006	0.591549
FMNL2	ENSG00000157827	protein_coding	formin-like 2		2031.19	-0.420957	0.0131343	0.187174		rs12996693	2	0.310535	0.00375916	0.761378
ATHL1	ENSG00000142102	protein_coding	ATH1, acid trehalase-like 1 (yeast)		378.551	-0.441414	0.0130935	0.187174		kgp10309281	11	-0.402466	0.00184669	0.684883
CCDC152	ENSG00000198865	protein_coding	coiled-coil domain containing 152		18.7079	-0.51022	0.0131509	0.187174		-	-	-	-	-
TIGIT	ENSG00000181847	protein_coding	T cell immunoreceptor with Ig and ITIM domains		130.419	-0.513233	0.0131351	0.187174		rs17666485	3	0.501333	0.00977895	0.84194
COCH	ENSG00000100473	protein_coding	cochlin		13.9276	-0.55587	0.0131318	0.187174		-	-	-	-	-
CRB2	ENSG00000148204	protein_coding	crumbs family member 2		3.92538	-0.566353	0.013059	0.187174		-	-	-	-	-
RP11-277P126	ENSG00000255641	protein_coding	Uncharacterized protein {ECO:0000313|Ensembl:ENSP00000437563}		6.74476	-0.590976	0.0131713	0.187174		-	-	-	-	-
C10orf2	ENSG00000107815	protein_coding	chromosome 10 open reading frame 2		273.236	0.405927	0.0132277	0.1873		rs7893126	10	-0.334147	0.00576373	0.797911
SLC25A51	ENSG00000122696	protein_coding	solute carrier family 25, member 51		294.334	0.251658	0.0132178	0.1873		rs12686391	9	-0.261933	0.000788624	0.571787
TAF9	ENSG00000273841	protein_coding	TAF9 RNA polymerase II, TATA box binding protein (TBP)-associated factor, 32kDa		1115.24	0.250141	0.0132196	0.1873		-	-	-	-	-
BOD1	ENSG00000145919	protein_coding	biorientation of chromosomes in cell division 1		313.802	0.213756	0.0132028	0.1873		rs13160587	5	-0.210491	0.00104083	0.612391
SMARCA5	ENSG00000153147	protein_coding	SWI/SNF related, matrix associated, actin dependent regulator of chromatin, subfamily a, member 5		3066.4	-0.300357	0.0131905	0.1873		kgp2642984	4	0.190417	0.00086678	0.586256
THBD	ENSG00000178726	protein_coding	thrombomodulin		672.535	0.588949	0.0133155	0.188333		rs6083315	20	1.12079	0.00216662	0.703099
CRYBB1	ENSG00000100122	protein_coding	crystallin, beta B1		79.6068	0.503007	0.0133198	0.188333		kgp9494154	22	-0.64264	0.000301958	0.439728
SPI1	ENSG00000066336	protein_coding	Spi-1 proto-oncogene		8717.75	0.165018	0.0133402	0.188368		rs10769288	11	0.105606	0.026473	0.901292
LINC00954	ENSG00000228784	lincRNA	long intergenic non-protein coding RNA 954		26.1229	-0.40429	0.0133639	0.188368		kgp6419637	2	-0.292697	0.000354188	0.462033
UBE2L6	ENSG00000156587	protein_coding	ubiquitin-conjugating enzyme E2L 6		3152.29	-0.477846	0.0133518	0.188368		kgp6302404	11	0.530888	0.018503	0.882493
ABCA6	ENSG00000154262	protein_coding	ATP-binding cassette, sub-family A (ABC1), member 6		69.8557	-0.497201	0.0133577	0.188368		kgp2290310	17	-0.320652	0.00629378	0.805753
ZNF208	ENSG00000160321	protein_coding	zinc finger protein 208		15.198	-0.505975	0.0133702	0.188368		-	-	-	-	-
RP11-713M152	ENSG00000272502	antisense			6.14415	-0.50775	0.0133845	0.188435		rs12334795	8	-0.125084	0.00107562	0.615427
PLCB3	ENSG00000149782	protein_coding	phospholipase C, beta 3 (phosphatidylinositol-specific)		736.868	0.238372	0.0134389	0.188662		rs495330	11	-0.24485	0.000102689	0.282481
TTC4	ENSG00000243725	protein_coding	tetratricopeptide repeat domain 4		589.501	0.223744	0.0134244	0.188662		rs12027962	1	0.190108	0.00111077	0.61836
COIL	ENSG00000121058	protein_coding	coilin		327.961	0.159607	0.0134364	0.188662		rs8073749	17	0.136768	0.00539038	0.792133
SLC6A12	ENSG00000111181	protein_coding	solute carrier family 6 (neurotransmitter transporter), member 12		411.524	-0.521017	0.0134356	0.188662		rs758790	12	-0.658855	0.0017309	0.678066
GJA1	ENSG00000152661	protein_coding	gap junction protein, alpha 1, 43kDa		1.06577	0.582893	0.0135035	0.189095		-	-	-	-	-
NTSR1	ENSG00000101188	protein_coding	neurotensin receptor 1 (high affinity)		47.3189	0.544014	0.0135119	0.189095		-	-	-	-	-
AAR2	ENSG00000131043	protein_coding	AAR2 splicing factor homolog (S. cerevisiae)		928.079	0.197596	0.013527	0.189095		rs6071459	20	-0.181616	8.19315e-05	0.252653
SMCO4	ENSG00000166002	protein_coding	single-pass membrane protein with coiled-coil domains 4		812.837	-0.470601	0.0135274	0.189095		rs12421052	11	0.672675	0.012719	0.858406
TMEM169	ENSG00000163449	protein_coding	transmembrane protein 169		5.05145	-0.494152	0.0134993	0.189095		-	-	-	-	-
RPL32P1	ENSG00000224796	processed_pseudogene	ribosomal protein L32 pseudogene 1		2.61904	-0.574879	0.0135179	0.189095		kgp8275337	6	0.296428	0.00575211	0.797911
TDP2	ENSG00000111802	protein_coding	tyrosyl-DNA phosphodiesterase 2		3785.11	0.3621	0.013539	0.189123		kgp5435917	6	0.62668	0.0012518	0.633602
RP11-767N67	ENSG00000230896	sense_intronic			3.74422	-0.544746	0.0135486	0.189123		kgp3551544	1	-0.431827	0.00182845	0.68403
TRAV6	ENSG00000211780	TR_V_gene	T cell receptor alpha variable 6		2.45257	-0.564357	0.0135709	0.189301		kgp5679843	14	0.320952	0.000349567	0.460261
BMX	ENSG00000102010	protein_coding	BMX non-receptor tyrosine kinase		1.96423	0.579357	0.0136086	0.189692		-	-	-	-	-
IL36RN	ENSG00000136695	protein_coding	interleukin 36 receptor antagonist		17.6358	0.586792	0.0136341	0.189825		-	-	-	-	-
RP11-834C117	ENSG00000250654	transcribed_unprocessed_pseudogene			2.62156	-0.566079	0.0136374	0.189825		kgp2935559	12	-0.292643	0.00654445	0.810537
CNTNAP1	ENSG00000108797	protein_coding	contactin associated protein 1		11.3164	-0.451716	0.0136676	0.19011		-	-	-	-	-
DUSP3	ENSG00000108861	protein_coding	dual specificity phosphatase 3		3535.13	0.246993	0.0136833	0.190116		rs455055	17	-0.212073	0.00242766	0.716071
GLB1L3	ENSG00000166105	protein_coding	galactosidase, beta 1-like 3		3.0708	-0.568534	0.0136873	0.190116		-	-	-	-	-
BUD31	ENSG00000106245	protein_coding	BUD31 homolog (S. cerevisiae)		721.405	0.138273	0.013697	0.190116		rs2625403	7	-0.160262	0.00776944	0.823225
SLC22A23	ENSG00000137266	protein_coding	solute carrier family 22, member 23		171.582	0.53124	0.0137103	0.190167		kgp11398768	6	0.457689	0.000128343	0.312945
EHD2	ENSG00000024422	protein_coding	EH-domain containing 2		146.84	0.557298	0.0138244	0.19095		kgp8421300	19	-0.471379	0.00474334	0.782199
GNPDA1	ENSG00000113552	protein_coding	glucosamine-6-phosphate deaminase 1		1830.13	0.343635	0.0137909	0.19095		rs1438699	5	-0.258826	0.0109764	0.849293
MIF	ENSG00000240972	protein_coding	macrophage migration inhibitory factor (glycosylation-inhibiting factor)		1438.97	0.310737	0.013826	0.19095		rs5759986	22	0.230752	0.00440909	0.7753
HYPK	ENSG00000242028	protein_coding	huntingtin interacting protein K		70.6768	-0.270085	0.0137953	0.19095		-	-	-	-	-
PIK3R6	ENSG00000276231	protein_coding	phosphoinositide-3-kinase, regulatory subunit 6		239.337	-0.323592	0.0138256	0.19095		-	-	-	-	-
GRPR	ENSG00000126010	protein_coding	gastrin-releasing peptide receptor		31.1587	-0.537836	0.0138314	0.19095		-	-	-	-	-
BEND5	ENSG00000162373	protein_coding	BEN domain containing 5		5.36566	-0.546839	0.0138345	0.19095		-	-	-	-	-
RP11-488C136	ENSG00000259081	antisense			5.33922	-0.521605	0.0138891	0.191569		kgp8557113	14	0.567731	0.00111959	0.619634
MS4A6E	ENSG00000166926	protein_coding	membrane-spanning 4-domains, subfamily A, member 6E		11.4864	0.57117	0.0139432	0.192164		rs1582763	11	0.415177	0.00344868	0.753023
ATP5G2	ENSG00000135390	protein_coding	ATP synthase, H+ transporting, mitochondrial Fo complex, subunit C2 (subunit 9)		2518.82	0.171595	0.0139655	0.192164		rs11171005	12	-0.158776	0.000896531	0.590814
SPG11	ENSG00000104133	protein_coding	spastic paraplegia 11 (autosomal recessive)		1999.95	-0.252536	0.0139649	0.192164		rs2663993	15	-0.114532	0.0171914	0.877847
KIR3DX1	ENSG00000104970	protein_coding	killer cell immunoglobulin-like receptor, three domains, X1		4.55406	-0.572289	0.0139713	0.192164		-	-	-	-	-
PAX5	ENSG00000196092	protein_coding	paired box 5		198.827	-0.563964	0.0139849	0.192217		rs11794762	9	0.821201	0.000197738	0.377945
ZMIZ1	ENSG00000108175	protein_coding	zinc finger, MIZ-type containing 1		8687.44	0.387997	0.0140153	0.192343		rs11002893	10	-0.549698	0.000425259	0.490982
SCAMP4	ENSG00000227500	protein_coding	secretory carrier membrane protein 4		1011.52	0.216491	0.0140234	0.192343		rs10421179	19	0.164136	0.00487883	0.784165
TNRC6B	ENSG00000100354	protein_coding	trinucleotide repeat containing 6B		775.968	-0.287591	0.014017	0.192343		kgp2632332	22	0.229948	0.0158318	0.873709
EXPH5	ENSG00000110723	protein_coding	exophilin 5		11.7807	-0.506021	0.0140554	0.192648		-	-	-	-	-
SATB1	ENSG00000182568	protein_coding	SATB homeobox 1		1066.7	0.405763	0.0140926	0.193004		kgp4360964	3	-0.305432	0.0071848	0.817977
TRGV10	ENSG00000211694	TR_V_gene	T cell receptor gamma variable 10 (non-functional)		7.2566	-0.557281	0.014101	0.193004		rs12531123	7	0.490432	0.00125391	0.634102
EEF1A1P11	ENSG00000228502	processed_pseudogene	eukaryotic translation elongation factor 1 alpha 1 pseudogene 11		1.28578	0.582222	0.0142027	0.193055		kgp2864883	1	-0.0786802	0.0002664	0.422279
RP11-295K31	ENSG00000250644	protein_coding	Uncharacterized protein {ECO:0000313|Ensembl:ENSP00000415840}		104.053	0.450215	0.0141708	0.193055		kgp4602165	11	-0.660168	0.00241488	0.715532
HOMER2	ENSG00000103942	protein_coding	homer homolog 2 (Drosophila)		68.6637	0.43038	0.014149	0.193055		rs4779069	15	0.552427	0.00258542	0.72507
KLF11	ENSG00000172059	protein_coding	Kruppel-like factor 11		808.897	0.352498	0.0141266	0.193055		rs1349722	2	0.280955	0.000745096	0.564367
PARN	ENSG00000140694	protein_coding	poly(A)-specific ribonuclease		674.311	-0.150502	0.0141972	0.193055		kgp3855118	16	-0.204275	0.00115991	0.622366
HENMT1	ENSG00000162639	protein_coding	HEN1 methyltransferase homolog 1 (Arabidopsis)		128.768	-0.296126	0.0141669	0.193055		rs661202	1	-0.234896	0.00301362	0.740842
RP11-553L65	ENSG00000259976	lincRNA			20.1227	-0.381659	0.0142075	0.193055		kgp5670850	3	0.110826	0.00531783	0.791316
TONSL	ENSG00000160949	protein_coding	tonsoku-like, DNA repair protein		76.4579	-0.414906	0.0142125	0.193055		-	-	-	-	-
AC0053063	ENSG00000267283	processed_transcript			14.3794	-0.452646	0.0141541	0.193055		kgp1843274	19	0.398556	0.00263708	0.726714
RP11-392O172	ENSG00000277007	lincRNA			2.7707	-0.54523	0.0142117	0.193055		-	-	-	-	-
AC1048094	ENSG00000233392	processed_transcript			5.14035	-0.569332	0.0141615	0.193055		kgp22787119	2	0.287138	0.00159073	0.665896
SYT1	ENSG00000067715	protein_coding	synaptotagmin I		54.8964	0.583032	0.0143071	0.193671		-	-	-	-	-
FAM193A	ENSG00000125386	protein_coding	family with sequence similarity 193, member A		657.028	0.194777	0.0142932	0.193671		kgp8601035	4	0.138452	0.0122216	0.855524
ZRSR2	ENSG00000169249	protein_coding	zinc finger (CCCH type), RNA-binding motif and serine/arginine rich 2		192.313	-0.303962	0.0142729	0.193671		-	-	-	-	-
SEC31B	ENSG00000075826	protein_coding	SEC31 homolog B (S. cerevisiae)		209.474	-0.354078	0.0142819	0.193671		kgp5168070	10	-0.28362	0.000749213	0.564734
C1orf228	ENSG00000198520	protein_coding	chromosome 1 open reading frame 228		93.2565	-0.517845	0.0143024	0.193671		kgp11873352	1	0.672219	0.00311856	0.743584
LARP1B	ENSG00000138709	protein_coding	La ribonucleoprotein domain family, member 1B		347.612	0.297733	0.0143472	0.19399		rs17012511	4	0.218415	0.00668616	0.812306
PUM1	ENSG00000134644	protein_coding	pumilio RNA-binding family member 1		1746.81	0.144364	0.0143526	0.19399		rs12756105	1	0.115515	0.00266116	0.727417
CD38	ENSG00000004468	protein_coding	CD38 molecule		1869.1	-0.578074	0.0143602	0.19399		kgp9705582	4	1.28337	0.00164998	0.671055
GPSM1	ENSG00000160360	protein_coding	G-protein signaling modulator 1		95.6414	0.388059	0.0144011	0.194407		rs2811751	9	-0.290812	0.0023998	0.714855
KIR2DL4	ENSG00000189013	protein_coding	killer cell immunoglobulin-like receptor, two domains, long cytoplasmic tail, 4		14.1464	-0.562652	0.0144108	0.194407		-	-	-	-	-
CDC42SE2	ENSG00000158985	protein_coding	CDC42 small effector 2		2327.26	-0.340938	0.0144348	0.194598		kgp862263	5	-0.250991	0.0382548	0.918158
APOL3	ENSG00000128284	protein_coding	apolipoprotein L, 3		5742.91	-0.56114	0.0144511	0.194685		rs2267341	22	0.984811	0.000482883	0.509752
IFI35	ENSG00000068079	protein_coding	interferon-induced protein 35		1235.07	-0.480279	0.0144619	0.194697		rs6503691	17	0.640844	0.00664413	0.811634
CXCL10	ENSG00000169245	protein_coding	chemokine (C-X-C motif) ligand 10		9975.89	-0.579715	0.0144912	0.194958		kgp5393470	4	1.4255	0.00470214	0.781012
CCDC169	ENSG00000242715	protein_coding	coiled-coil domain containing 169		2.84089	0.581611	0.0145083	0.195055		-	-	-	-	-
DDIAS	ENSG00000165490	protein_coding	DNA damage-induced apoptosis suppressor		106.473	-0.464281	0.0145632	0.195527		kgp7081167	11	0.561111	0.000855461	0.58356
KIF20A	ENSG00000112984	protein_coding	kinesin family member 20A		58.1804	-0.535962	0.0145633	0.195527		rs2916647	5	-0.299564	0.00430204	0.773592
SEMA3G	ENSG00000010319	protein_coding	sema domain, immunoglobulin domain (Ig), short basic domain, secreted, (semaphorin) 3G		9.18302	0.5342	0.0145969	0.195846		-	-	-	-	-
AC0073261	ENSG00000279560	protein_coding	Uncharacterized protein {ECO:0000313|Ensembl:ENSP00000485226}		1.90712	-0.566553	0.0146204	0.196026		-	-	-	-	-
LCNL1	ENSG00000214402	protein_coding	lipocalin-like 1		7.46495	-0.578386	0.0146538	0.196341		-	-	-	-	-
KXD1	ENSG00000105700	protein_coding	KxDL motif containing 1		1431.61	0.128048	0.014692	0.196585		kgp11786490	19	-0.126749	0.00048774	0.5109
PARP12	ENSG00000059378	protein_coding	poly (ADP-ribose) polymerase family, member 12		3075.77	-0.323934	0.0146846	0.196585		kgp10420724	7	-0.273626	0.00114867	0.621306
PIGBOS1	ENSG00000225973	protein_coding	PIGB opposite strand 1		134.108	0.229869	0.0147065	0.196646		kgp3439166	15	-0.338453	0.0001414	0.326429
NSA2	ENSG00000164346	protein_coding	NSA2 ribosome biogenesis homolog (S. cerevisiae)		1033.32	0.227781	0.0147581	0.197202		rs957680	5	0.312994	1.78247e-05	0.106194
XXbac-BPG116M517	ENSG00000244255	protein_coding	Uncharacterized protein {ECO:0000313|Ensembl:ENSP00000410815}; cDNA FLJ55673, highly similar to Complement factor B {ECO:0000313|EMBL:BAG64956.1}		398.688	-0.539642	0.014771	0.197241		kgp7413010	6	-0.961001	0.00588535	0.800321
RP5-884G62	ENSG00000228084	antisense			2.05219	-0.535487	0.0148241	0.197815		rs10875198	1	0.11442	0.0162746	0.875376
ST7	ENSG00000004866	protein_coding	suppression of tumorigenicity 7		320.94	0.262887	0.0149611	0.197909		kgp8524728	7	-0.252902	0.00195226	0.690382
YY1	ENSG00000100811	protein_coding	YY1 transcription factor		1619.25	0.196567	0.0149495	0.197909		rs721910	14	-0.226083	0.000846772	0.581968
RNPEPL1	ENSG00000142327	protein_coding	arginyl aminopeptidase (aminopeptidase B)-like 1		2090.76	0.177305	0.0149289	0.197909		kgp3909248	2	-0.196584	0.00784798	0.82406
RHBDF2	ENSG00000129667	protein_coding	rhomboid 5 homolog 2 (Drosophila)		2774.09	-0.241953	0.0149739	0.197909		rs1000821	17	0.170145	0.00361979	0.757692
SEC61A2	ENSG00000065665	protein_coding	Sec61 alpha 2 subunit (S. cerevisiae)		62.5227	-0.267606	0.0148677	0.197909		rs10906189	10	-0.204835	0.00156093	0.664024
ANKRD36	ENSG00000135976	protein_coding	ankyrin repeat domain 36		227.464	-0.291753	0.0148745	0.197909		kgp7154755	2	0.277515	0.000217718	0.393642
VAMP1	ENSG00000139190	protein_coding	vesicle-associated membrane protein 1 (synaptobrevin 1)		409.085	-0.357863	0.0149791	0.197909		rs2239167	12	-0.431077	0.000452246	0.500392
NLRC3	ENSG00000167984	protein_coding	NLR family, CARD domain containing 3		498.016	-0.465598	0.0149819	0.197909		rs6500743	16	-0.484057	0.000219274	0.394907
NHS	ENSG00000188158	protein_coding	Nance-Horan syndrome (congenital cataracts and dental anomalies)		55.2716	-0.468979	0.0149528	0.197909		-	-	-	-	-
AC0693631	ENSG00000277089	antisense			5.48441	-0.481249	0.0149587	0.197909		-	-	-	-	-
PYCR1	ENSG00000183010	protein_coding	pyrroline-5-carboxylate reductase 1		29.5124	-0.493707	0.0149022	0.197909		kgp130516	17	0.236134	0.00983253	0.842288
PDCD1LG2	ENSG00000197646	protein_coding	programmed cell death 1 ligand 2		804.242	-0.504604	0.0149585	0.197909		kgp4726199	9	0.566587	0.00482383	0.783614
ZC3HAV1	ENSG00000105939	protein_coding	zinc finger CCCH-type, antiviral 1		9598.24	-0.508019	0.0149125	0.197909		kgp6078958	7	0.973194	0.000974687	0.604222
HLA-DOB	ENSG00000241106	protein_coding	major histocompatibility complex, class II, DO beta		42.6309	-0.531894	0.0149703	0.197909		rs3134603	6	0.675575	0.000255372	0.416137
IL27	ENSG00000197272	protein_coding	interleukin 27		182.072	-0.5694	0.0149786	0.197909		kgp8769	16	1.31277	0.00394196	0.765596
ATG5	ENSG00000057663	protein_coding	autophagy related 5		667.559	0.139602	0.0150254	0.197917		rs12209167	6	0.209895	0.0010856	0.616148
NRDE2	ENSG00000119720	protein_coding	NRDE-2, necessary for RNA interference, domain containing		419.7	-0.187853	0.0150423	0.197917		kgp7733198	14	0.127768	0.00112168	0.619634
MPHOSPH6	ENSG00000135698	protein_coding	M-phase phosphoprotein 6		259.998	-0.25811	0.0150729	0.197917		kgp5431411	16	0.21859	3.80302e-05	0.164087
ZNF737	ENSG00000237440	protein_coding	zinc finger protein 737		108.385	-0.32167	0.0150335	0.197917		kgp8735583	19	0.377653	0.00151173	0.66006
SAMD15	ENSG00000100583	protein_coding	sterile alpha motif domain containing 15		5.96996	-0.49249	0.0150631	0.197917		-	-	-	-	-
TMIGD2	ENSG00000167664	protein_coding	transmembrane and immunoglobulin domain containing 2		35.234	-0.49649	0.015004	0.197917		rs12974635	19	-0.475779	0.000806384	0.575231
CEP83-AS1	ENSG00000278916	TEC	CEP83 antisense RNA 1 (head to head)		3.33214	-0.500599	0.0150663	0.197917		-	-	-	-	-
RP11-876N243	ENSG00000280153	TEC			96.8523	-0.522412	0.0150304	0.197917		-	-	-	-	-
HCAR1	ENSG00000196917	protein_coding	hydroxycarboxylic acid receptor 1		1.55148	-0.576459	0.0150699	0.197917		-	-	-	-	-
GOLGA7B	ENSG00000155265	protein_coding	golgin A7 family, member B		168.583	0.536599	0.0151191	0.198135		kgp6114323	10	0.738496	0.00210202	0.698533
STARD10	ENSG00000214530	protein_coding	StAR-related lipid transfer (START) domain containing 10		171.87	0.376998	0.015178	0.198135		rs10751226	11	0.198816	0.0357677	0.914783
UBE2J2	ENSG00000160087	protein_coding	ubiquitin-conjugating enzyme E2, J2		758.159	0.204337	0.0151106	0.198135		kgp6557389	1	-0.164632	0.00365261	0.758508
PLCG1	ENSG00000124181	protein_coding	phospholipase C, gamma 1		428.104	-0.362393	0.0151681	0.198135		rs2902942	20	0.388515	0.00311963	0.743584
PRKD2	ENSG00000105287	protein_coding	protein kinase D2		349.317	-0.38852	0.0151689	0.198135		kgp6517538	19	-0.314931	0.00375303	0.7612
OTUD7A	ENSG00000169918	protein_coding	OTU deubiquitinase 7A		25.9731	-0.449239	0.01518	0.198135		-	-	-	-	-
CCL5	ENSG00000271503	protein_coding	chemokine (C-C motif) ligand 5		4302.13	-0.472575	0.0151507	0.198135		-	-	-	-	-
COL4A4	ENSG00000081052	protein_coding	collagen, type IV, alpha 4		5.8155	-0.556463	0.0151598	0.198135		-	-	-	-	-
RP11-27K133	ENSG00000236137	antisense			1.11757	-0.561096	0.0151274	0.198135		-	-	-	-	-
PFN4	ENSG00000176732	protein_coding	profilin family, member 4		2.38545	-0.542184	0.0151944	0.198192		-	-	-	-	-
GPR113	ENSG00000173567	protein_coding	G protein-coupled receptor 113		5.42991	-0.491365	0.0152094	0.198256		-	-	-	-	-
RP11-742B181	ENSG00000249001	antisense			1.47272	0.564842	0.0152213	0.19828		-	-	-	-	-
NBL1	ENSG00000158747	protein_coding	neuroblastoma 1, DAN family BMP antagonist		471.982	0.496859	0.0152317	0.198284		rs7513800	1	-0.742325	2.76713e-05	0.137789
IL15	ENSG00000164136	protein_coding	interleukin 15		349.895	-0.519736	0.0152454	0.198332		kgp5690724	4	-0.924433	0.0014268	0.653412
C5orf24	ENSG00000181904	protein_coding	chromosome 5 open reading frame 24		1170.7	0.24933	0.0152873	0.198499		rs874021	5	-0.24856	0.000765491	0.568113
DPYD	ENSG00000188641	protein_coding	dihydropyrimidine dehydrogenase		3434.69	-0.32549	0.015293	0.198499		rs12060538	1	-0.361944	0.00119785	0.626958
IFI16	ENSG00000163565	protein_coding	interferon, gamma-inducible protein 16		2105.64	-0.411809	0.0152986	0.198499		kgp8171538	1	0.367181	0.00175368	0.678932
C2	ENSG00000166278	protein_coding	complement component 2		4559.73	-0.496381	0.0152846	0.198499		rs1042147	6	-0.565616	0.00249667	0.720167
ADARB1	ENSG00000197381	protein_coding	adenosine deaminase, RNA-specific, B1		629.547	0.362731	0.0153746	0.199105		kgp8622637	21	0.42471	0.000539822	0.524481
AMER1	ENSG00000184675	protein_coding	APC membrane recruitment protein 1		181.45	-0.413569	0.0153756	0.199105		-	-	-	-	-
KIR2DP1	ENSG00000242473	unprocessed_pseudogene	killer cell immunoglobulin-like receptor, two domains, pseudogene 1		1.09259	-0.577438	0.0153676	0.199105		-	-	-	-	-
AP1G2	ENSG00000213983	protein_coding	adaptor-related protein complex 1, gamma 2 subunit		637.003	-0.333707	0.0153997	0.199285		rs17103735	14	-0.413195	0.00896185	0.835091
HNRNPA0	ENSG00000177733	protein_coding	heterogeneous nuclear ribonucleoprotein A0		2048.5	0.147226	0.0154484	0.199776		kgp2699186	5	-0.151184	0.00306817	0.742892
B3GALT2	ENSG00000162630	protein_coding	UDP-Gal:betaGlcNAc beta 1,3-galactosyltransferase, polypeptide 2		5.97218	-0.539759	0.0154579	0.199776		-	-	-	-	-
FCRLA	ENSG00000132185	protein_coding	Fc receptor-like A		157.456	-0.481053	0.0154741	0.199854		kgp778481	1	-0.597428	0.0126672	0.857934
TGFBI	ENSG00000120708	protein_coding	transforming growth factor, beta-induced, 68kDa		52842.8	0.42361	0.0155116	0.200076		kgp2009068	5	0.366766	0.00295495	0.739297
TIMM17B	ENSG00000126768	protein_coding	translocase of inner mitochondrial membrane 17 homolog B (yeast)		276.821	0.173944	0.015506	0.200076		-	-	-	-	-
SERPINB10	ENSG00000242550	protein_coding	serpin peptidase inhibitor, clade B (ovalbumin), member 10		6.03791	0.574521	0.0155249	0.200116		-	-	-	-	-
PSMB10	ENSG00000205220	protein_coding	proteasome (prosome, macropain) subunit, beta type, 10		1730.93	-0.428172	0.0155854	0.20062		rs8049247	16	-0.487925	0.00929467	0.837662
TRAFD1	ENSG00000135148	protein_coding	TRAF-type zinc finger domain containing 1		1909.72	-0.442581	0.0155945	0.20062		rs7961650	12	0.38095	0.0193036	0.885216
SERPING1	ENSG00000149131	protein_coding	serpin peptidase inhibitor, clade G (C1 inhibitor), member 1		3650.27	-0.571434	0.0155779	0.20062		rs10792088	11	-1.4947	0.0145596	0.867931
MPHOSPH9	ENSG00000051825	protein_coding	M-phase phosphoprotein 9		343.01	-0.230791	0.015615	0.200753		kgp12128045	12	-0.155338	0.0202348	0.887872
GSTO2	ENSG00000065621	protein_coding	glutathione S-transferase omega 2		9.92888	0.557925	0.0156545	0.201074		-	-	-	-	-
TRNAU1AP	ENSG00000180098	protein_coding	tRNA selenocysteine 1 associated protein 1		334.541	0.145371	0.0156623	0.201074		rs766385	1	-0.144847	0.00339804	0.750658
KIAA0922	ENSG00000121210	protein_coding	KIAA0922		432.528	-0.4593	0.0156706	0.201074		rs1873367	4	0.616058	0.000559179	0.528142
AGGF1P2	ENSG00000233435	processed_pseudogene	angiogenic factor with G patch and FHA domains 1 pseudogene 2		3.65291	-0.492882	0.0156905	0.201198		kgp802141	10	-0.109257	0.0216907	0.891989
AC0679453	ENSG00000229023	processed_pseudogene			1.59137	-0.575836	0.0157179	0.201418		rs10192358	2	-0.200557	0.000646494	0.543808
ZNF442	ENSG00000198342	protein_coding	zinc finger protein 442		18.2695	-0.451301	0.0157771	0.202045		-	-	-	-	-
UBE2R2	ENSG00000107341	protein_coding	ubiquitin-conjugating enzyme E2R 2		950.461	0.222453	0.0158108	0.20229		kgp83420	9	-0.147239	0.00749901	0.821358
MAP4K1	ENSG00000104814	protein_coding	mitogen-activated protein kinase kinase kinase kinase 1		170.458	-0.454218	0.0158168	0.20229		kgp6678681	19	-0.719465	0.000153085	0.338883
SIRPA	ENSG00000198053	protein_coding	signal-regulatory protein alpha		16346.5	0.211551	0.0158679	0.20259		kgp1049292	20	-0.122199	1.75607e-05	0.105149
CTSO	ENSG00000256043	protein_coding	cathepsin O		1071.7	-0.284197	0.0158606	0.20259		kgp5507842	4	0.3591	0.000197443	0.377726
SPOCK2	ENSG00000107742	protein_coding	sparc/osteonectin, cwcv and kazal-like domains proteoglycan (testican) 2		1446.79	-0.463901	0.015871	0.20259		rs12778790	10	-0.535183	0.00259447	0.725382
CABIN1	ENSG00000099991	protein_coding	calcineurin binding protein 1		976.331	-0.20048	0.0159001	0.202591		kgp7067440	22	-0.300344	0.000254358	0.415157
BOC	ENSG00000144857	protein_coding	BOC cell adhesion associated, oncogene regulated		6.31583	-0.549923	0.015902	0.202591		-	-	-	-	-
OR7E140P	ENSG00000238152	unprocessed_pseudogene	olfactory receptor, family 7, subfamily E, member 140 pseudogene		1.28927	-0.557149	0.0158946	0.202591		-	-	-	-	-
CXCL2	ENSG00000081041	protein_coding	chemokine (C-X-C motif) ligand 2		2416.99	0.452737	0.0159554	0.203008		kgp11311040	4	0.402692	0.00294837	0.73915
ZNF75A	ENSG00000162086	protein_coding	zinc finger protein 75a		265.566	-0.210044	0.0159539	0.203008		rs7193552	16	0.140562	0.000804766	0.574964
NPM1P25	ENSG00000229417	processed_pseudogene	nucleophosmin 1 (nucleolar phosphoprotein B23, numatrin) pseudogene 25		5.45226	-0.526405	0.0159658	0.20301		kgp1008869	10	-0.160541	0.00467838	0.780434
DDX31	ENSG00000125485	protein_coding	DEAD (Asp-Glu-Ala-Asp) box polypeptide 31		278.691	0.313388	0.015995	0.20325		rs2519154	9	0.239144	0.00453035	0.776936
BAI2	ENSG00000121753	protein_coding	brain-specific angiogenesis inhibitor 2		1.2961	-0.564858	0.0160212	0.203451		-	-	-	-	-
RP11-269F213	ENSG00000249815	lincRNA			3.495	0.575433	0.0160753	0.203613		rs966055	4	0.324355	0.00491193	0.784264
PRRG2	ENSG00000126460	protein_coding	proline rich Gla (G-carboxyglutamic acid) 2		6.55539	0.493828	0.0160646	0.203613		-	-	-	-	-
ZNF763	ENSG00000197054	protein_coding	zinc finger protein 763		34.9568	-0.379967	0.0160658	0.203613		kgp3873399	19	0.287099	0.00139779	0.649414
ERVH48-1	ENSG00000233056	lincRNA	endogenous retrovirus group 48, member 1		3.88206	-0.523503	0.0160554	0.203613		rs2838295	21	-0.0642024	0.000719292	0.558809
CAMP	ENSG00000164047	protein_coding	cathelicidin antimicrobial peptide		9.56845	0.57105	0.0160957	0.203741		-	-	-	-	-
CEACAM8	ENSG00000124469	protein_coding	carcinoembryonic antigen-related cell adhesion molecule 8		4.81346	0.507042	0.0161506	0.203848		-	-	-	-	-
TESK2	ENSG00000070759	protein_coding	testis-specific kinase 2		113.559	0.325718	0.0161559	0.203848		kgp2566147	1	-0.193019	0.00655836	0.810849
DIEXF	ENSG00000117597	protein_coding	digestive organ expansion factor homolog (zebrafish)		643.369	0.200108	0.0161188	0.203848		rs1316508	1	0.118377	0.00400291	0.767129
ZNF347	ENSG00000197937	protein_coding	zinc finger protein 347		173.585	-0.261389	0.016154	0.203848		kgp12147760	19	-0.270552	1.73906e-05	0.10443
FAM46C	ENSG00000183508	protein_coding	family with sequence similarity 46, member C		135.2	-0.505957	0.0161265	0.203848		kgp8516968	1	0.242516	0.0207633	0.889434
RP11-517H26	ENSG00000272980	processed_transcript			16.6978	-0.453987	0.0162048	0.204334		rs9347206	6	-0.076145	0.017431	0.87861
MICB	ENSG00000204516	protein_coding	MHC class I polypeptide-related sequence B		733.867	-0.404201	0.0162648	0.204427		kgp3831111	6	-0.43125	0.00123542	0.630964
BLM	ENSG00000197299	protein_coding	Bloom syndrome, RecQ helicase-like		124.749	-0.429806	0.0162603	0.204427		kgp12434713	15	0.349799	0.000940908	0.597835
RP11-70D242	ENSG00000278058	lincRNA			9.30773	-0.439875	0.0162732	0.204427		-	-	-	-	-
CTB-114C74	ENSG00000250274	lincRNA			25.5996	-0.449137	0.0162745	0.204427		rs12521917	5	0.241166	0.000396129	0.478499
SLC38A1	ENSG00000111371	protein_coding	solute carrier family 38, member 1		1204.43	-0.458842	0.0162617	0.204427		rs11183403	12	0.44484	0.00134635	0.643822
APOBEC3H	ENSG00000100298	protein_coding	apolipoprotein B mRNA editing enzyme, catalytic polypeptide-like 3H		45.0648	-0.491204	0.0162233	0.204427		rs79503	22	-0.38334	0.00315309	0.74386
GPX7	ENSG00000116157	protein_coding	glutathione peroxidase 7		40.0631	-0.425773	0.0163043	0.204542		kgp4800711	1	0.384809	2.424e-06	0.0281939
GSDMB	ENSG00000073605	protein_coding	gasdermin B		78.9754	-0.453331	0.0163035	0.204542		kgp5515732	17	-0.5514	0.00552525	0.794178
PJA1	ENSG00000181191	protein_coding	praja ring finger 1, E3 ubiquitin protein ligase		347.563	-0.188573	0.0163202	0.204611		-	-	-	-	-
CCDC64	ENSG00000135127	protein_coding	coiled-coil domain containing 64		159.166	-0.461841	0.0163434	0.20477		rs2292681	12	0.439896	0.000293787	0.437691
DNMBP	ENSG00000107554	protein_coding	dynamin binding protein		352.471	0.413991	0.016431	0.204827		rs603424	10	-0.481261	0.00124123	0.63213
ABHD4	ENSG00000100439	protein_coding	abhydrolase domain containing 4		801.129	0.315959	0.0164296	0.204827		rs11844749	14	0.319133	0.000405974	0.482407
ELK4	ENSG00000158711	protein_coding	ELK4, ETS-domain protein (SRF accessory protein 1)		1741.63	-0.228557	0.0164225	0.204827		rs6593958	1	0.246478	0.000372167	0.470875
TNRC6C	ENSG00000078687	protein_coding	trinucleotide repeat containing 6C		255.449	-0.421089	0.0164292	0.204827		kgp8313853	17	0.492119	0.0012993	0.638768
GFI1	ENSG00000162676	protein_coding	growth factor independent 1 transcription repressor		97.9074	-0.445358	0.0163678	0.204827		rs12082710	1	-0.264835	0.011408	0.850389
C10orf35	ENSG00000171224	protein_coding	chromosome 10 open reading frame 35		11.064	-0.503524	0.0164287	0.204827		-	-	-	-	-
E2F7	ENSG00000165891	protein_coding	E2F transcription factor 7		131.061	-0.50413	0.0164315	0.204827		kgp8844776	12	0.349465	0.000846581	0.581968
PTGDR	ENSG00000168229	protein_coding	prostaglandin D2 receptor (DP)		16.8006	-0.516769	0.0164415	0.204827		-	-	-	-	-
TOX2	ENSG00000124191	protein_coding	TOX high mobility group box family member 2		27.1191	-0.521352	0.0163924	0.204827		-	-	-	-	-
RPL12	ENSG00000197958	protein_coding	ribosomal protein L12		6867.34	0.21199	0.0164576	0.204898		kgp3211662	9	-0.169571	0.000514757	0.518595
AC0095061	ENSG00000224152	antisense			110.758	0.28405	0.0164981	0.205087		rs4665072	2	0.1582	0.0040328	0.767738
ZNF107	ENSG00000196247	protein_coding	zinc finger protein 107		290.005	-0.406106	0.0164871	0.205087		rs1816700	7	-0.30191	5.04664e-05	0.193116
CD24	ENSG00000272398	protein_coding	CD24 molecule		50.1273	-0.541463	0.016504	0.205087		-	-	-	-	-
MTERF2	ENSG00000120832	protein_coding	mitochondrial transcription termination factor 2		72.3354	-0.276108	0.0165152	0.205096		kgp9799377	12	-0.242889	7.84566e-05	0.247893
GRIP1	ENSG00000155974	protein_coding	glutamate receptor interacting protein 1		12.9045	0.557727	0.0168098	0.205098		-	-	-	-	-
VSTM4	ENSG00000165633	protein_coding	V-set and transmembrane domain containing 4		10.9448	0.530254	0.0168016	0.205098		-	-	-	-	-
HIST1H2BN	ENSG00000233822	protein_coding	histone cluster 1, H2bn		7.49305	0.49774	0.0165347	0.205098		-	-	-	-	-
CTNNBIP1	ENSG00000178585	protein_coding	catenin, beta interacting protein 1		288.739	0.331624	0.01671	0.205098		rs7412149	1	0.190377	0.00377517	0.762032
SPATA2L	ENSG00000158792	protein_coding	spermatogenesis associated 2-like		159.748	0.32729	0.0166805	0.205098		kgp6470397	16	-0.285392	0.010621	0.847539
CYSTM1	ENSG00000120306	protein_coding	cysteine-rich transmembrane module containing 1		1475.1	0.285088	0.0165945	0.205098		kgp8645217	5	-0.218907	0.00347384	0.753386
ADRM1	ENSG00000130706	protein_coding	adhesion regulating molecule 1		2092.04	0.205963	0.016766	0.205098		rs4142484	20	0.143775	0.00127617	0.636531
RPL15	ENSG00000174748	protein_coding	ribosomal protein L15		11667.7	0.205021	0.016724	0.205098		rs12108186	3	0.196637	0.000502456	0.515121
NAIF1	ENSG00000171169	protein_coding	nuclear apoptosis inducing factor 1		164.392	0.180124	0.0166778	0.205098		kgp3776152	9	-0.140807	0.0182439	0.881959
MRPS11	ENSG00000181991	protein_coding	mitochondrial ribosomal protein S11		365.437	0.170814	0.016569	0.205098		kgp3771288	15	-0.207544	0.00323325	0.746672
COX10-AS1	ENSG00000236088	processed_transcript	COX10 antisense RNA 1		72.4712	-0.261815	0.0167032	0.205098		rs8077639	17	-0.24565	0.0032303	0.746361
RERE	ENSG00000142599	protein_coding	arginine-glutamic acid dipeptide (RE) repeats		967.862	-0.32728	0.0166054	0.205098		rs4926481	1	0.191531	0.00391092	0.765067
LINC01138	ENSG00000274020	lincRNA	long intergenic non-protein coding RNA 1138		47.938	-0.342689	0.0167799	0.205098		-	-	-	-	-
RP11-326I113	ENSG00000271646	lincRNA			47.3332	-0.359503	0.0167986	0.205098		rs10026207	4	-0.158886	0.00133162	0.641919
RP11-378J189	ENSG00000276997	lincRNA			16.9993	-0.37019	0.0167975	0.205098		-	-	-	-	-
RP4-669L1710	ENSG00000237094	lincRNA			115.674	-0.372764	0.0165522	0.205098		rs6687776	1	0.415646	0.0138518	0.864669
RP11-206L101	ENSG00000224956	unprocessed_pseudogene			149.282	-0.374809	0.0167406	0.205098		rs13303118	1	0.270807	0.0161507	0.875123
LINC00265	ENSG00000188185	lincRNA	long intergenic non-protein coding RNA 265		56.5563	-0.383782	0.0166139	0.205098		kgp2665344	7	0.262613	0.00181673	0.683339
SIDT2	ENSG00000149577	protein_coding	SID1 transmembrane family, member 2		1760.59	-0.390516	0.016663	0.205098		kgp1918175	11	-0.386911	0.000130787	0.315615
LY75	ENSG00000054219	protein_coding	lymphocyte antigen 75		1254.15	-0.39533	0.0168173	0.205098		kgp7439482	2	0.265089	0.0103909	0.845756
PARP10	ENSG00000178685	protein_coding	poly (ADP-ribose) polymerase family, member 10		1300.56	-0.410191	0.0167253	0.205098		kgp9461105	8	0.415312	0.00894413	0.835008
LINC01410	ENSG00000238113	lincRNA	long intergenic non-protein coding RNA 1410		63.4374	-0.425861	0.016779	0.205098		-	-	-	-	-
CABP4	ENSG00000175544	protein_coding	calcium binding protein 4		18.952	-0.458678	0.0167484	0.205098		-	-	-	-	-
MIAT	ENSG00000225783	lincRNA	myocardial infarction associated transcript (non-protein coding)		850.781	-0.47695	0.0165863	0.205098		rs1006208	22	-0.49192	0.000887261	0.58988
RP1-102E248	ENSG00000256433	lincRNA			5.25738	-0.514049	0.0167804	0.205098		kgp1613306	12	0.10435	0.00770009	0.822677
RTP4	ENSG00000136514	protein_coding	receptor (chemosensory) transporter protein 4		281.176	-0.517494	0.0165761	0.205098		kgp7333495	3	0.633603	0.000847591	0.581968
ENPP6	ENSG00000164303	protein_coding	ectonucleotide pyrophosphatase/phosphodiesterase 6		4.63577	-0.524553	0.0167033	0.205098		-	-	-	-	-
LINC01012	ENSG00000281706	lincRNA	long intergenic non-protein coding RNA 1012		2.56456	-0.537293	0.0165581	0.205098		-	-	-	-	-
GGT5	ENSG00000099998	protein_coding	gamma-glutamyltransferase 5		17.9791	-0.562849	0.016808	0.205098		-	-	-	-	-
CCL23	ENSG00000274736	protein_coding	chemokine (C-C motif) ligand 23		133.416	-0.555044	0.0168424	0.205277		-	-	-	-	-
ASIC1	ENSG00000110881	protein_coding	acid sensing (proton gated) ion channel 1		75.7635	0.523363	0.0169245	0.205443		kgp4429589	12	-0.369988	0.00865699	0.832878
PRR5	ENSG00000186654	protein_coding	proline rich 5 (renal)		146.995	0.489538	0.0169128	0.205443		rs5764804	22	-0.602186	0.000692265	0.553297
FAM20C	ENSG00000177706	protein_coding	family with sequence similarity 20, member C		4262.45	0.359111	0.0169377	0.205443		kgp9460025	7	-0.467921	0.000956245	0.600486
ITPR2	ENSG00000123104	protein_coding	inositol 1,4,5-trisphosphate receptor, type 2		3915.97	-0.339974	0.0169108	0.205443		rs278990	12	0.297888	0.00106155	0.614474
C5orf15	ENSG00000113583	protein_coding	chromosome 5 open reading frame 15		2284.98	-0.359841	0.0169371	0.205443		rs461596	5	-0.31426	0.00294029	0.73863
CHRNA5	ENSG00000169684	protein_coding	cholinergic receptor, nicotinic, alpha 5 (neuronal)		7.97754	-0.506138	0.0169324	0.205443		-	-	-	-	-
GOLGA8Q	ENSG00000178115	protein_coding	golgin A8 family, member Q		10.2709	-0.526178	0.0168891	0.205443		-	-	-	-	-
RP11-532F63	ENSG00000272463	lincRNA			19.7574	-0.531662	0.016949	0.205443		rs12210966	6	0.229574	0.00204408	0.694728
ABCC11	ENSG00000121270	protein_coding	ATP-binding cassette, sub-family C (CFTR/MRP), member 11		3.56563	-0.557408	0.0169499	0.205443		-	-	-	-	-
PPFIA2	ENSG00000139220	protein_coding	protein tyrosine phosphatase, receptor type, f polypeptide (PTPRF), interacting protein (liprin), alpha 2		2.90589	0.567076	0.0169853	0.205543		-	-	-	-	-
F2RL2	ENSG00000164220	protein_coding	coagulation factor II (thrombin) receptor-like 2		13.8559	0.511897	0.0169868	0.205543		-	-	-	-	-
PBLD	ENSG00000108187	protein_coding	phenazine biosynthesis-like protein domain containing		80.7032	0.329278	0.0170119	0.205543		rs10823325	10	0.165023	0.00887479	0.834772
UBXN4	ENSG00000144224	protein_coding	UBX domain protein 4		3339.72	-0.140629	0.0170225	0.205543		rs13401318	2	0.121386	0.00163872	0.669994
HVCN1	ENSG00000122986	protein_coding	hydrogen voltage gated channel 1		974.664	-0.382022	0.0170169	0.205543		kgp3766741	12	0.400335	0.0110171	0.84938
CD27	ENSG00000139193	protein_coding	CD27 molecule		87.4082	-0.504268	0.0170223	0.205543		kgp1875706	12	0.577245	0.00328933	0.748418
WDR49	ENSG00000174776	protein_coding	WD repeat domain 49		1.17548	-0.567836	0.0170312	0.205543		-	-	-	-	-
PHACTR1	ENSG00000112137	protein_coding	phosphatase and actin regulator 1		383.108	0.487208	0.0170873	0.205716		rs2841512	6	0.820598	0.00290073	0.737035
RPS24	ENSG00000138326	protein_coding	ribosomal protein S24		8240.36	0.207962	0.017085	0.205716		rs12248504	10	-0.293018	0.00191401	0.688863
TIA1	ENSG00000116001	protein_coding	TIA1 cytotoxic granule-associated RNA binding protein		1030.63	-0.247105	0.0170658	0.205716		rs428148	2	-0.189414	0.000739137	0.563564
RP11-314C91	ENSG00000280276	TEC			1.35319	-0.555282	0.0170791	0.205716		-	-	-	-	-
RAB38	ENSG00000123892	protein_coding	RAB38, member RAS oncogene family		198.812	0.514466	0.0171358	0.205959		kgp4507238	11	0.604554	0.00109241	0.616347
DRG1	ENSG00000185721	protein_coding	developmentally regulated GTP binding protein 1		671.371	0.122086	0.0171362	0.205959		rs738993	22	-0.191617	0.0054054	0.792374
AKAP5	ENSG00000179841	protein_coding	A kinase (PRKA) anchor protein 5		87.5952	-0.490063	0.0171388	0.205959		-	-	-	-	-
RP11-159D128	ENSG00000279207	TEC			35.7331	-0.376209	0.0171546	0.206022		-	-	-	-	-
TRAV13-2	ENSG00000211791	TR_V_gene	T cell receptor alpha variable 13-2		3.19695	-0.545982	0.0171837	0.206246		rs7140697	14	0.381797	0.000397628	0.479074
NAA40	ENSG00000110583	protein_coding	N(alpha)-acetyltransferase 40, NatD catalytic subunit		254.207	-0.194502	0.0172109	0.206447		kgp11430245	11	-0.132775	0.0158069	0.873657
NEDD4L	ENSG00000049759	protein_coding	neural precursor cell expressed, developmentally down-regulated 4-like, E3 ubiquitin protein ligase		318.955	0.471262	0.0172982	0.206613		kgp10224373	18	0.438734	0.00292037	0.73753
MED10	ENSG00000133398	protein_coding	mediator complex subunit 10		535.727	0.221353	0.0172551	0.206613		kgp7671871	5	0.241303	0.00145869	0.655689
RCN1	ENSG00000049449	protein_coding	reticulocalbin 1, EF-hand calcium binding domain		1636.8	-0.271798	0.0172731	0.206613		kgp4520138	11	-0.225	0.000862842	0.585452
ST3GAL5	ENSG00000115525	protein_coding	ST3 beta-galactoside alpha-2,3-sialyltransferase 5		1480.12	-0.34059	0.017295	0.206613		rs2583554	2	-0.427545	0.00273532	0.730117
GPR174	ENSG00000147138	protein_coding	G protein-coupled receptor 174		62.1856	-0.485606	0.0172764	0.206613		-	-	-	-	-
CLCN4	ENSG00000073464	protein_coding	chloride channel, voltage-sensitive 4		83.4871	-0.540522	0.0172732	0.206613		-	-	-	-	-
FLT3	ENSG00000122025	protein_coding	fms-related tyrosine kinase 3		19.4307	-0.541414	0.017294	0.206613		-	-	-	-	-
LAIR2	ENSG00000167618	protein_coding	leukocyte-associated immunoglobulin-like receptor 2		11.9991	-0.5665	0.017321	0.206761		-	-	-	-	-
DOHH	ENSG00000129932	protein_coding	deoxyhypusine hydroxylase/monooxygenase		217.768	0.23078	0.01736	0.20685		kgp22786847	19	0.321349	0.00164837	0.670796
ZNF257	ENSG00000197134	protein_coding	zinc finger protein 257		31.2287	-0.477781	0.0173452	0.20685		rs1912576	19	0.509193	6.96288e-06	0.058843
RP11-345K202	ENSG00000229659	processed_pseudogene			1.91401	-0.524667	0.0173571	0.20685		rs3740293	10	0.247358	0.0113244	0.850088
RNASEK	ENSG00000219200	protein_coding	ribonuclease, RNase K		3869.08	0.154998	0.0174494	0.207365		rs218671	17	-0.104315	0.000342237	0.457473
SGPP1	ENSG00000126821	protein_coding	sphingosine-1-phosphate phosphatase 1		1035.14	-0.323659	0.0174524	0.207365		kgp7159474	14	-0.385803	0.000148985	0.334414
GIMAP4	ENSG00000133574	protein_coding	GTPase, IMAP family member 4		1040.26	-0.431917	0.017423	0.207365		rs10252902	7	0.429873	0.00299653	0.740058
CEACAM21	ENSG00000007129	protein_coding	carcinoembryonic antigen-related cell adhesion molecule 21		79.5115	-0.495496	0.0174559	0.207365		rs11083627	19	-0.887402	4.30191e-08	0.00120399
EDARADD	ENSG00000186197	protein_coding	EDAR-associated death domain		18.9024	-0.540381	0.017449	0.207365		-	-	-	-	-
JAM3	ENSG00000166086	protein_coding	junctional adhesion molecule 3		23.3755	-0.490082	0.01749	0.207645		-	-	-	-	-
TP73	ENSG00000078900	protein_coding	tumor protein p73		5.32622	-0.519909	0.0175083	0.207737		-	-	-	-	-
RP11-356J512	ENSG00000250303	lincRNA			14.7861	0.43095	0.0175325	0.207843		kgp2843960	11	0.24707	0.00815429	0.827877
CD34	ENSG00000174059	protein_coding	CD34 molecule		7.19428	-0.549762	0.0175384	0.207843		-	-	-	-	-
EIF5	ENSG00000100664	protein_coding	eukaryotic translation initiation factor 5		5598.66	0.291747	0.0176231	0.208309		kgp202339	14	-0.202767	0.00526359	0.790457
NSMF	ENSG00000165802	protein_coding	NMDA receptor synaptonuclear signaling and neuronal migration factor		415.256	0.257361	0.0176623	0.208309		rs6422889	9	0.145438	0.00542723	0.792664
MED19	ENSG00000156603	protein_coding	mediator complex subunit 19		147.819	0.224684	0.0176179	0.208309		kgp6581459	11	-0.165313	0.000744274	0.564358
MRPL57	ENSG00000173141	protein_coding	mitochondrial ribosomal protein L57		349.462	0.167845	0.0176527	0.208309		rs7333214	13	0.196818	0.00224995	0.707589
AKNA	ENSG00000106948	protein_coding	AT-hook transcription factor		1314.67	-0.362591	0.0176381	0.208309		kgp3305511	9	-0.34994	0.00190163	0.687896
RP5-1180D121	ENSG00000280202	TEC			40.1369	-0.384481	0.0176487	0.208309		-	-	-	-	-
PTPRG	ENSG00000144724	protein_coding	protein tyrosine phosphatase, receptor type, G		2.49955	-0.546764	0.0176386	0.208309		-	-	-	-	-
RP11-598F73	ENSG00000256948	antisense			3.17671	-0.564318	0.0176581	0.208309		kgp3494243	12	0.311812	0.000736903	0.562908
ADSSL1	ENSG00000185100	protein_coding	adenylosuccinate synthase like 1		30.9835	0.54227	0.0177401	0.208493		-	-	-	-	-
P4HA3	ENSG00000149380	protein_coding	prolyl 4-hydroxylase, alpha polypeptide III		72.9555	0.529648	0.0177496	0.208493		rs529513	11	-0.388624	0.00826879	0.828649
NAGPA	ENSG00000103174	protein_coding	N-acetylglucosamine-1-phosphodiester alpha-N-acetylglucosaminidase		724.491	0.245246	0.0177155	0.208493		kgp3956856	16	0.248908	4.30684e-05	0.177401
ARHGAP9	ENSG00000123329	protein_coding	Rho GTPase activating protein 9		655.919	-0.278733	0.0177626	0.208493		kgp9159490	12	0.172	0.043207	0.922953
DDX12P	ENSG00000214826	unprocessed_pseudogene	DEAD/H (Asp-Glu-Ala-Asp/His) box polypeptide 12, pseudogene		19.8809	-0.418033	0.0177336	0.208493		rs12320763	12	-0.14137	6.89634e-05	0.230954
RP11-526I25	ENSG00000270127	lincRNA			29.4231	-0.445472	0.0177464	0.208493		rs12460	15	-0.293219	4.1791e-08	0.0011855
PCGF2	ENSG00000277258	protein_coding	polycomb group ring finger 2		105.675	-0.46104	0.0177588	0.208493		-	-	-	-	-
TRAV23DV6	ENSG00000211803	TR_V_gene	T cell receptor alpha variable 23/delta variable 6		3.2319	-0.543058	0.0177022	0.208493		kgp5270705	14	-0.335242	0.000324239	0.450931
MFSD5	ENSG00000182544	protein_coding	major facilitator superfamily domain containing 5		672.856	0.170149	0.0177845	0.208627		rs10876496	12	0.268671	0.00231878	0.71013
DMTN	ENSG00000158856	protein_coding	dematin actin binding protein		16.907	-0.493208	0.0178079	0.208777		-	-	-	-	-
HAVCR1	ENSG00000113249	protein_coding	hepatitis A virus cellular receptor 1		18.1379	0.536749	0.0178274	0.208881		-	-	-	-	-
TCEB3	ENSG00000011007	protein_coding	transcription elongation factor B (SIII), polypeptide 3 (110kDa, elongin A)		2582.42	0.248112	0.0178862	0.209296		rs2473375	1	0.142085	0.0120328	0.854505
YKT6	ENSG00000106636	protein_coding	YKT6 v-SNARE homolog (S. cerevisiae)		2278.97	0.167527	0.0178948	0.209296		kgp7217608	7	-0.132567	0.000242798	0.408546
DGKG	ENSG00000058866	protein_coding	diacylglycerol kinase, gamma 90kDa		127.528	-0.438921	0.0178827	0.209296		rs3819863	3	0.31193	0.00137413	0.647623
MORN2	ENSG00000188010	protein_coding	MORN repeat containing 2		112.531	0.277189	0.0179528	0.209851		kgp11232455	2	-0.316912	0.000789908	0.571918
FJX1	ENSG00000179431	protein_coding	four jointed box 1 (Drosophila)		186.054	0.468953	0.0179664	0.209885		rs697320	11	0.409199	0.00023857	0.406369
TRPV3	ENSG00000167723	protein_coding	transient receptor potential cation channel, subfamily V, member 3		10.5949	-0.548361	0.0180157	0.210336		-	-	-	-	-
EIF2B4	ENSG00000115211	protein_coding	eukaryotic translation initiation factor 2B, subunit 4 delta, 67kDa		464.821	0.202103	0.0180498	0.210461		kgp3389708	2	-0.163254	0.0174403	0.878652
SMARCA2	ENSG00000080503	protein_coding	SWI/SNF related, matrix associated, actin dependent regulator of chromatin, subfamily a, member 2		1374.42	-0.205633	0.0180672	0.210461		rs7021223	9	-0.351705	0.000252525	0.413998
ZNF66	ENSG00000160229	protein_coding	zinc finger protein 66		18.0302	-0.373705	0.0180496	0.210461		-	-	-	-	-
GIMAP2	ENSG00000106560	protein_coding	GTPase, IMAP family member 2		557.987	-0.411687	0.0180692	0.210461		kgp10415722	7	0.41938	0.000178087	0.362481
ZMYM3	ENSG00000147130	protein_coding	zinc finger, MYM-type 3		343.456	-0.342327	0.0180873	0.210548		-	-	-	-	-
RPUSD1	ENSG00000007376	protein_coding	RNA pseudouridylate synthase domain containing 1		207.476	0.187858	0.0181066	0.210648		kgp8526513	16	0.204979	0.00800756	0.826305
KANTR	ENSG00000232593	lincRNA	KDM5C adjacent non-coding transcript		9.24488	-0.427944	0.0181448	0.210843		-	-	-	-	-
CCDC136	ENSG00000128596	protein_coding	coiled-coil domain containing 136		13.6258	-0.446669	0.0181425	0.210843		-	-	-	-	-
SEC22C	ENSG00000093183	protein_coding	SEC22 vesicle trafficking protein homolog C (S. cerevisiae)		1278.64	0.218599	0.0182103	0.21148		kgp12325682	3	0.170364	0.00316659	0.744271
MIR4697HG	ENSG00000280237	TEC	MIR4697 host gene (non-protein coding)		14.7628	-0.486803	0.0182685	0.21194		-	-	-	-	-
TRAV21	ENSG00000211801	TR_V_gene	T cell receptor alpha variable 21		5.03276	-0.534005	0.0182714	0.21194		kgp331668	14	-0.641176	0.000567986	0.530675
ENPP2	ENSG00000136960	protein_coding	ectonucleotide pyrophosphatase/phosphodiesterase 2		1120.12	-0.537161	0.0182957	0.212097		kgp22771402	8	0.884066	0.000777974	0.570107
PCDHGA9	ENSG00000261934	protein_coding	protocadherin gamma subfamily A, 9		4.02221	0.541977	0.0183195	0.212122		-	-	-	-	-
SLC16A3	ENSG00000141526	protein_coding	solute carrier family 16 (monocarboxylate transporter), member 3		9640.78	0.197073	0.0183191	0.212122		kgp10396554	17	0.193387	0.00229983	0.709795
TIFAB	ENSG00000255833	protein_coding	TRAF-interacting protein with forkhead-associated domain, family member B		641.69	-0.517783	0.0183481	0.212329		kgp8173550	5	0.637948	0.00308827	0.743584
ASMT	ENSG00000196433	protein_coding	acetylserotonin O-methyltransferase		1.21159	-0.56388	0.0183853	0.212635		-	-	-	-	-
USP11	ENSG00000102226	protein_coding	ubiquitin specific peptidase 11		551.658	-0.295395	0.0184015	0.212635		-	-	-	-	-
RP11-640L92	ENSG00000281100	TEC			7.5519	-0.483556	0.0184069	0.212635		-	-	-	-	-
RFX5	ENSG00000143390	protein_coding	regulatory factor X, 5 (influences HLA class II expression)		1726.14	-0.389218	0.0184479	0.212983		rs11204754	1	-0.276403	0.00894408	0.835008
RP11-229D133	ENSG00000280388	TEC			10.7241	-0.382553	0.0184848	0.213271		-	-	-	-	-
FBXO43	ENSG00000156509	protein_coding	F-box protein 43		5.66275	-0.517708	0.0184945	0.213271		-	-	-	-	-
GOLGA4	ENSG00000144674	protein_coding	golgin A4		2318.09	-0.199166	0.0185115	0.213343		rs818811	3	0.187883	0.00321757	0.746056
GABPA	ENSG00000154727	protein_coding	GA binding protein transcription factor, alpha subunit 60kDa		1000.23	0.156318	0.018586	0.214076		kgp10906844	21	-0.236397	6.56168e-05	0.224544
C3	ENSG00000125730	protein_coding	complement component 3		2188.11	0.422401	0.0186182	0.21411		kgp6339643	19	-0.66528	0.0037544	0.7612
WIPI2	ENSG00000157954	protein_coding	WD repeat domain, phosphoinositide interacting 2		1380.41	0.170607	0.0186216	0.21411		rs1860883	7	-0.164636	0.000200726	0.380277
ASPM	ENSG00000066279	protein_coding	asp (abnormal spindle) homolog, microcephaly associated (Drosophila)		158.256	-0.512158	0.0186042	0.21411		-	-	-	-	-
PTPN4	ENSG00000088179	protein_coding	protein tyrosine phosphatase, non-receptor type 4 (megakaryocyte)		223.4	-0.328587	0.0186501	0.214296		rs10496561	2	0.369122	0.00339633	0.750651
RP11-492E32	ENSG00000227619	antisense			1.12303	-0.554945	0.0186595	0.214296		-	-	-	-	-
ABCC6P1	ENSG00000256340	transcribed_unprocessed_pseudogene	ATP-binding cassette, sub-family C, member 6 pseudogene 1 (functional)		1.05501	0.556588	0.018683	0.214441		-	-	-	-	-
POLE3	ENSG00000148229	protein_coding	polymerase (DNA directed), epsilon 3, accessory subunit		989.875	0.187925	0.0187178	0.214715		kgp8955969	9	-0.275058	0.000937166	0.597147
PLAT	ENSG00000104368	protein_coding	plasminogen activator, tissue		95.1097	0.547357	0.0187948	0.215068		-	-	-	-	-
PLK2	ENSG00000145632	protein_coding	polo-like kinase 2		123.1	0.500688	0.0188089	0.215068		kgp9865848	5	-0.495591	0.00696689	0.815301
COG8	ENSG00000213380	protein_coding	component of oligomeric golgi complex 8		415.256	0.172963	0.0187645	0.215068		rs10445010	16	-0.185918	0.00676876	0.812922
CLEC2B	ENSG00000110852	protein_coding	C-type lectin domain family 2, member B		587.086	-0.318386	0.0187864	0.215068		kgp8064260	12	-0.214077	0.00379616	0.76249
TRBV4-2	ENSG00000211745	TR_V_gene	T cell receptor beta variable 4-2		6.7596	-0.529518	0.0188119	0.215068		rs11768398	7	0.466072	0.000257969	0.417089
RORB	ENSG00000198963	protein_coding	RAR-related orphan receptor B		2.77152	-0.553135	0.0188141	0.215068		-	-	-	-	-
ANKRD29	ENSG00000154065	protein_coding	ankyrin repeat domain 29		34.8318	-0.464466	0.0188876	0.215696		rs1791520	18	-0.261511	0.0067723	0.812922
ANKEF1	ENSG00000132623	protein_coding	ankyrin repeat and EF-hand domain containing 1		31.8831	-0.475095	0.0188909	0.215696		-	-	-	-	-
ACP2	ENSG00000134575	protein_coding	acid phosphatase 2, lysosomal		4253.39	-0.272622	0.01891	0.215788		rs6485807	11	-0.1929	0.0106779	0.847928
ALDH1L2	ENSG00000136010	protein_coding	aldehyde dehydrogenase 1 family, member L2		100.628	0.458011	0.0189496	0.215858		-	-	-	-	-
IRAK1	ENSG00000184216	protein_coding	interleukin-1 receptor-associated kinase 1		4554.73	0.333355	0.018936	0.215858		-	-	-	-	-
HAUS5	ENSG00000249115	protein_coding	HAUS augmin-like complex, subunit 5		144.841	-0.3265	0.0189531	0.215858		kgp769115	19	0.462753	5.08061e-05	0.193743
DNA2	ENSG00000138346	protein_coding	DNA replication helicase/nuclease 2		66.8902	-0.41309	0.0189599	0.215858		kgp1362831	10	-0.215875	0.00319422	0.744936
ADRB1	ENSG00000043591	protein_coding	adrenoceptor beta 1		1.93666	-0.559392	0.0190145	0.216355		-	-	-	-	-
CLNK	ENSG00000109684	protein_coding	cytokine-dependent hematopoietic cell linker		5.95484	-0.531093	0.0190411	0.216532		-	-	-	-	-
SLC24A4	ENSG00000140090	protein_coding	solute carrier family 24 (sodium/potassium/calcium exchanger), member 4		46.7338	0.455121	0.0190845	0.216653		-	-	-	-	-
CCDC85C	ENSG00000205476	protein_coding	coiled-coil domain containing 85C		20.3809	-0.450227	0.0190848	0.216653		-	-	-	-	-
LINC01059	ENSG00000255414	lincRNA	long intergenic non-protein coding RNA 1059		1.17075	-0.552736	0.0190809	0.216653		-	-	-	-	-
CYTH2	ENSG00000105443	protein_coding	cytohesin 2		836.915	0.179524	0.0191014	0.216693		rs1366444	19	-0.106696	0.00198318	0.691292
ENPP4	ENSG00000001561	protein_coding	ectonucleotide pyrophosphatase/phosphodiesterase 4 (putative)		790.394	-0.394476	0.0191105	0.216693		rs10807337	6	-0.358433	0.00339978	0.750658
SV2A	ENSG00000159164	protein_coding	synaptic vesicle glycoprotein 2A		7.90308	-0.492408	0.0191212	0.216693		-	-	-	-	-
SUGP2	ENSG00000064607	protein_coding	SURP and G patch domain containing 2		1787.26	-0.141673	0.0191718	0.217016		kgp3391332	19	-0.112454	0.000569928	0.530675
MSL3	ENSG00000005302	protein_coding	male-specific lethal 3 homolog (Drosophila)		912.955	-0.300525	0.0191674	0.217016		-	-	-	-	-
TRMT61B	ENSG00000171103	protein_coding	tRNA methyltransferase 61B		144.096	0.273755	0.0193172	0.21769		rs4334451	2	0.240878	0.00169175	0.674904
CDKN2AIP	ENSG00000168564	protein_coding	CDKN2A interacting protein		785.653	0.272331	0.0193198	0.21769		rs13145928	4	0.306704	0.00192156	0.689123
CFAP36	ENSG00000163001	protein_coding	cilia and flagella associated protein 36		294.193	0.263521	0.0192809	0.21769		kgp1017346	2	0.201651	0.00583552	0.799524
TRIT1	ENSG00000043514	protein_coding	tRNA isopentenyltransferase 1		159.609	0.261917	0.0193109	0.21769		rs6693041	1	-0.29269	0.00238244	0.714196
SMIM12	ENSG00000163866	protein_coding	small integral membrane protein 12		919.398	0.178277	0.0193046	0.21769		rs10914802	1	0.144706	0.000135479	0.320705
VCPIP1	ENSG00000175073	protein_coding	valosin containing protein (p97)/p47 complex interacting protein 1		1552.95	-0.325198	0.0192459	0.21769		rs9643575	8	-0.214089	0.000224627	0.396685
RIC3	ENSG00000166405	protein_coding	RIC3 acetylcholine receptor chaperone		42.8511	-0.472303	0.0192781	0.21769		rs11522663	11	0.379385	0.0013834	0.648163
TOP2A	ENSG00000131747	protein_coding	topoisomerase (DNA) II alpha 170kDa		468.648	-0.508145	0.0193025	0.21769		kgp3920811	17	-0.650458	0.00583164	0.79943
NOL7	ENSG00000225921	protein_coding	nucleolar protein 7, 27kDa		604.326	0.170136	0.0193515	0.217922		rs10456703	6	-0.159084	0.000626138	0.540392
RFX3-AS1	ENSG00000232104	lincRNA	RFX3 antisense RNA 1		4.95151	-0.484238	0.0193644	0.217943		kgp7735389	9	0.245395	0.000273195	0.426775
ANKRD36C	ENSG00000174501	protein_coding	ankyrin repeat domain 36C		184.816	-0.294766	0.0193871	0.21795		rs1808357	2	0.240289	0.0117447	0.853026
SCO2	ENSG00000130489	protein_coding	SCO2 cytochrome c oxidase assembly protein		707.347	-0.409106	0.0193835	0.21795		rs3091397	22	0.474731	0.00108914	0.616329
CDC42EP3	ENSG00000163171	protein_coding	CDC42 effector protein (Rho GTPase binding) 3		631.082	0.406486	0.0194298	0.218305		rs2041837	2	0.40097	0.00124128	0.63213
ETNK1	ENSG00000139163	protein_coding	ethanolamine kinase 1		1934.39	-0.18437	0.019508	0.219059		kgp7674478	12	-0.200866	0.00280091	0.732929
EXOC3L4	ENSG00000205436	protein_coding	exocyst complex component 3-like 4		18.238	-0.555994	0.0195195	0.219063		-	-	-	-	-
RP11-463O125	ENSG00000280138	TEC			61.5255	-0.329534	0.0195637	0.219435		-	-	-	-	-
FAM219B	ENSG00000178761	protein_coding	family with sequence similarity 219, member B		693.151	0.21131	0.0195947	0.219627		kgp161382	15	0.16416	0.00211107	0.699211
CA6	ENSG00000131686	protein_coding	carbonic anhydrase VI		1.62659	-0.549178	0.0196032	0.219627		-	-	-	-	-
CLSTN3	ENSG00000139182	protein_coding	calsyntenin 3		161.471	-0.459778	0.0196211	0.219703		kgp3615983	12	0.433362	0.00172714	0.677867
LYSMD2	ENSG00000140280	protein_coding	LysM, putative peptidoglycan-binding, domain containing 2		416.216	-0.4123	0.0196425	0.219817		kgp5596443	15	-0.332835	0.0084337	0.830479
POP7	ENSG00000172336	protein_coding	processing of precursor 7, ribonuclease P/MRP subunit (S. cerevisiae)		151.566	0.184525	0.0196857	0.22009		kgp6346877	7	0.148666	0.0156195	0.872441
ABCA2	ENSG00000107331	protein_coding	ATP-binding cassette, sub-family A (ABC1), member 2		778.798	-0.243046	0.01971	0.22009		rs7037783	9	0.219849	0.00171651	0.676925
AP0004761	ENSG00000237484	lincRNA			23.2458	-0.421278	0.0197116	0.22009		rs2828495	21	0.257598	0.0121938	0.85529
RSAD2	ENSG00000134321	protein_coding	radical S-adenosyl methionine domain containing 2		3138.23	-0.550643	0.0196994	0.22009		rs6708659	2	-1.89875	0.000869102	0.5866
HEXDC	ENSG00000169660	protein_coding	hexosaminidase (glycosyl hydrolase family 20, catalytic domain) containing		240.73	-0.336039	0.0197289	0.220159		kgp7272771	17	-0.266893	0.00621316	0.804693
MCOLN2	ENSG00000153898	protein_coding	mucolipin 2		577.451	-0.467462	0.0197631	0.220416		kgp4707957	1	-0.950591	0.00092704	0.59577
ZNF143	ENSG00000166478	protein_coding	zinc finger protein 143		340.213	0.236302	0.0197892	0.220581		rs7103258	11	0.191222	0.00684149	0.813921
MB	ENSG00000198125	protein_coding	myoglobin		2.22853	-0.55589	0.0198022	0.220601		-	-	-	-	-
COL17A1	ENSG00000065618	protein_coding	collagen, type XVII, alpha 1		1.4827	0.541084	0.0198771	0.220937		-	-	-	-	-
DTNA	ENSG00000134769	protein_coding	dystrobrevin, alpha		138.313	0.484893	0.0198712	0.220937		kgp22808536	18	-0.696738	0.000278204	0.430067
PRKCI	ENSG00000163558	protein_coding	protein kinase C, iota		425.666	0.210572	0.019861	0.220937		rs6787205	3	-0.156864	0.00641948	0.808258
KLHL29	ENSG00000119771	protein_coding	kelch-like family member 29		10.0613	-0.523224	0.0198441	0.220937		-	-	-	-	-
CCDC127	ENSG00000164366	protein_coding	coiled-coil domain containing 127		318.254	0.206438	0.0198991	0.221057		kgp6875957	5	-0.159046	0.00821595	0.828253
LUZP1	ENSG00000169641	protein_coding	leucine zipper protein 1		1201.07	-0.176215	0.0199207	0.221172		rs10799798	1	-0.203656	0.000977958	0.604508
YIPF3	ENSG00000137207	protein_coding	Yip1 domain family, member 3		1415.82	0.13881	0.0199494	0.221366		kgp17047632	6	-0.114322	0.00138181	0.648124
CDC42BPA	ENSG00000143776	protein_coding	CDC42 binding protein kinase alpha (DMPK-like)		345.256	0.309626	0.0199886	0.221676		rs12142165	1	-0.254608	0.000208227	0.386748
IL19	ENSG00000142224	protein_coding	interleukin 19		3.03167	0.551298	0.0202076	0.2226		-	-	-	-	-
ARHGEF28	ENSG00000214944	protein_coding	Rho guanine nucleotide exchange factor (GEF) 28		7.92053	0.506913	0.0200955	0.2226		-	-	-	-	-
RP1-40E1612	ENSG00000272277	antisense			4.51858	0.488448	0.0201811	0.2226		kgp11212391	6	-0.1679	0.00154996	0.662992
CRISP3	ENSG00000096006	protein_coding	cysteine-rich secretory protein 3		11.443	0.47107	0.0201467	0.2226		-	-	-	-	-
USP12	ENSG00000152484	protein_coding	ubiquitin specific peptidase 12		9806.63	0.389759	0.0202019	0.2226		rs2996450	13	-0.440383	0.000762983	0.567446
SLC16A1	ENSG00000155380	protein_coding	solute carrier family 16 (monocarboxylate transporter), member 1		2399.13	0.3865	0.0201029	0.2226		rs12127798	1	-0.31679	0.00890556	0.834806
TBC1D10B	ENSG00000169221	protein_coding	TBC1 domain family, member 10B		1080.65	0.131638	0.0201377	0.2226		rs11648675	16	-0.130324	0.00461292	0.779367
DCTN2	ENSG00000175203	protein_coding	dynactin 2 (p50)		1816.87	0.113374	0.0202028	0.2226		rs730560	12	-0.0935041	0.0189376	0.884392
PSMA2	ENSG00000106588	protein_coding	proteasome (prosome, macropain) subunit, alpha type, 2		1829.46	-0.301904	0.0201235	0.2226		rs17753324	7	-0.333065	0.00444218	0.776041
ACE	ENSG00000159640	protein_coding	angiotensin I converting enzyme		2666.36	-0.403244	0.0201381	0.2226		kgp12481097	17	0.369919	0.00667955	0.812285
STON1	ENSG00000243244	protein_coding	stonin 1		14.042	-0.466084	0.0202069	0.2226		-	-	-	-	-
GZMK	ENSG00000113088	protein_coding	granzyme K (granzyme 3; tryptase II)		65.4859	-0.518727	0.020181	0.2226		kgp10747984	5	0.531227	0.00950138	0.83917
HDGFRP3	ENSG00000166503	protein_coding	Hepatoma-derived growth factor-related protein 3		136.939	0.393471	0.0202366	0.222756		rs17158080	15	0.392363	0.000606498	0.537269
TIMM22	ENSG00000177370	protein_coding	translocase of inner mitochondrial membrane 22 homolog (yeast)		194.899	0.226262	0.0202783	0.222756		rs8065481	17	0.161281	0.000325796	0.450931
TM2D1	ENSG00000162604	protein_coding	TM2 domain containing 1		450.049	0.183915	0.0202605	0.222756		kgp4582061	1	-0.163829	0.002982	0.73991
FBXO2	ENSG00000116661	protein_coding	F-box protein 2		6.63114	-0.507529	0.0202607	0.222756		-	-	-	-	-
POU2AF1	ENSG00000110777	protein_coding	POU class 2 associating factor 1		87.7581	-0.531532	0.0202684	0.222756		rs4936070	11	0.371115	0.0105812	0.847283
N4BP2L1	ENSG00000139597	protein_coding	NEDD4 binding protein 2-like 1		1009.55	-0.398223	0.020308	0.222958		kgp7630174	13	0.504106	0.00184733	0.684883
APCDD1	ENSG00000154856	protein_coding	adenomatosis polyposis coli down-regulated 1		3.46326	0.518344	0.0203459	0.223126		-	-	-	-	-
RPS19BP1	ENSG00000187051	protein_coding	ribosomal protein S19 binding protein 1		903.781	0.210103	0.0203573	0.223126		kgp10162879	22	0.388523	0.00063238	0.541588
TRIM14	ENSG00000106785	protein_coding	tripartite motif containing 14		1352	-0.390022	0.0203487	0.223126		rs1167763	9	-0.485733	0.0018306	0.684135
EPHB3	ENSG00000182580	protein_coding	EPH receptor B3		12.392	0.497037	0.0203889	0.223144		-	-	-	-	-
pk	ENSG00000091436	protein_coding	Mitogen-activated protein kinase kinase kinase MLT		1318.63	0.349866	0.0204496	0.223144		rs1595796	2	-0.327969	0.00146568	0.655712
NT5DC2	ENSG00000168268	protein_coding	5'-nucleotidase domain containing 2		949.664	0.340298	0.0204378	0.223144		rs11717383	3	0.260669	0.00185282	0.685117
PIN4	ENSG00000102309	protein_coding	protein (peptidylprolyl cis/trans isomerase) NIMA-interacting, 4 (parvulin)		173.652	0.223596	0.0204022	0.223144		-	-	-	-	-
ZNF708	ENSG00000182141	protein_coding	zinc finger protein 708		247.472	-0.235122	0.0204468	0.223144		kgp4275110	19	0.158972	0.0132205	0.860747
RP11-448G153	ENSG00000261490	sense_overlapping			103.769	-0.304502	0.0204078	0.223144		kgp4737755	4	0.21792	2.45264e-05	0.129741
RP11-442O14	ENSG00000278214	lincRNA			4.54126	-0.477588	0.0204409	0.223144		-	-	-	-	-
TICRR	ENSG00000140534	protein_coding	TOPBP1-interacting checkpoint and replication regulator		32.9325	-0.488624	0.0204342	0.223144		-	-	-	-	-
ANGPTL4	ENSG00000167772	protein_coding	angiopoietin-like 4		14.9545	0.535644	0.0205246	0.223338		-	-	-	-	-
DHRS1	ENSG00000157379	protein_coding	dehydrogenase/reductase (SDR family) member 1		205.697	0.288266	0.0205695	0.223338		kgp2485062	14	-0.350201	0.000515357	0.518599
ZNF473	ENSG00000142528	protein_coding	zinc finger protein 473		194.511	0.240171	0.0205101	0.223338		kgp8524366	19	0.194704	0.00286662	0.736411
TMED1	ENSG00000099203	protein_coding	transmembrane emp24 protein transport domain containing 1		306.822	0.184015	0.0205322	0.223338		rs799193	19	0.176389	0.00832065	0.829348
CCDC124	ENSG00000007080	protein_coding	coiled-coil domain containing 124		538.57	0.147864	0.0205471	0.223338		kgp7062428	19	0.130646	0.0039442	0.765596
PDCD4	ENSG00000150593	protein_coding	programmed cell death 4 (neoplastic transformation inhibitor)		1135.61	-0.317418	0.0205081	0.223338		kgp2459538	10	-0.264305	0.00262814	0.726368
AMIGO2	ENSG00000139211	protein_coding	adhesion molecule with Ig-like domain 2		81.2587	-0.426838	0.0205607	0.223338		rs11183403	12	0.318224	6.77152e-05	0.228589
SMPD3	ENSG00000103056	protein_coding	sphingomyelin phosphodiesterase 3, neutral membrane (neutral sphingomyelinase II)		19.219	-0.5158	0.0205434	0.223338		-	-	-	-	-
HERC5	ENSG00000138646	protein_coding	HECT and RLD domain containing E3 ubiquitin protein ligase 5		821.062	-0.534385	0.020537	0.223338		kgp11579184	4	-1.28788	0.00599779	0.802105
NINJ2	ENSG00000171840	protein_coding	ninjurin 2		47.0851	0.36936	0.0206198	0.2234		rs12827	12	-0.452073	0.00416162	0.771127
SLC7A6	ENSG00000103064	protein_coding	solute carrier family 7 (amino acid transporter light chain, y+L system), member 6		835.087	-0.20099	0.0205968	0.2234		rs12599580	16	0.16893	0.0111566	0.84954
RP11-356I24	ENSG00000237499	antisense			45.2042	-0.37829	0.0205983	0.2234		rs9376369	6	-0.309432	0.00876864	0.834209
LAMP3	ENSG00000078081	protein_coding	lysosomal-associated membrane protein 3		339.004	-0.497711	0.0206204	0.2234		rs7637137	3	0.682968	9.81776e-05	0.276627
GRAMD1B	ENSG00000023171	protein_coding	GRAM domain containing 1B		154.411	-0.429895	0.0206393	0.223481		kgp894624	11	0.360997	5.42572e-05	0.200796
ANGEL1	ENSG00000013523	protein_coding	angel homolog 1 (Drosophila)		1296.54	-0.228269	0.0206509	0.223484		kgp8248291	14	-0.221383	0.0030951	0.743584
RPL9	ENSG00000163682	protein_coding	ribosomal protein L9		6421.96	0.258122	0.020676	0.22351		rs2249563	4	0.323049	3.62382e-08	0.00104213
NAA60	ENSG00000122390	protein_coding	N(alpha)-acetyltransferase 60, NatF catalytic subunit		888.249	0.17312	0.0206697	0.22351		rs12448488	16	-0.208829	0.000153747	0.339145
ARHGAP23	ENSG00000275832	protein_coding	Rho GTPase activating protein 23		153.952	0.427024	0.0207233	0.223775		-	-	-	-	-
PDP1	ENSG00000164951	protein_coding	pyruvate dehyrogenase phosphatase catalytic subunit 1		512.552	-0.3646	0.0207173	0.223775		kgp2171612	8	-0.324326	0.00124265	0.632328
GRK5	ENSG00000198873	protein_coding	G protein-coupled receptor kinase 5		101.32	-0.428487	0.0207785	0.224248		rs7092363	10	-0.389974	0.000708175	0.556212
CHID1	ENSG00000177830	protein_coding	chitinase domain containing 1		634.851	0.260708	0.0208392	0.22478		kgp12501418	11	-0.211165	0.00440904	0.7753
PCDHGA11	ENSG00000253873	protein_coding	protocadherin gamma subfamily A, 11		39.5834	0.410537	0.0208971	0.225178		-	-	-	-	-
CTC-205M65	ENSG00000260841	sense_overlapping			85.5582	0.37968	0.020899	0.225178		rs248247	5	-0.269292	0.000925242	0.595486
ENPP5	ENSG00000112796	protein_coding	ectonucleotide pyrophosphatase/phosphodiesterase 5 (putative)		3.72858	-0.505136	0.0209152	0.22523		-	-	-	-	-
GALNT9	ENSG00000182870	protein_coding	polypeptide N-acetylgalactosaminyltransferase 9		2.71139	0.547447	0.0209309	0.225276		-	-	-	-	-
WI2-87327B82	ENSG00000273812	lincRNA			12.2854	0.500144	0.020947	0.225326		-	-	-	-	-
ALDH7A1	ENSG00000164904	protein_coding	aldehyde dehydrogenase 7 family, member A1		258.737	0.434665	0.0209928	0.225419		kgp12553796	5	-0.397766	0.0138156	0.864417
TAX1BP1	ENSG00000106052	protein_coding	Tax1 (human T-cell leukemia virus type I) binding protein 1		2836.73	-0.159275	0.0210014	0.225419		kgp5772387	7	0.0877931	0.00679229	0.813219
ZBTB37	ENSG00000185278	protein_coding	zinc finger and BTB domain containing 37		695.652	-0.226015	0.0209737	0.225419		rs12040255	1	0.265698	1.05985e-05	0.0763866
KPNA5	ENSG00000196911	protein_coding	karyopherin alpha 5 (importin alpha 6)		166.421	-0.333635	0.0209799	0.225419		rs195482	6	-0.205602	0.000523854	0.521778
UMODL1-AS1	ENSG00000184385	sense_overlapping	UMODL1 antisense RNA 1		1.46494	0.520475	0.0210785	0.226113		-	-	-	-	-
RBP1	ENSG00000114115	protein_coding	retinol binding protein 1, cellular		72.3714	0.512864	0.0211148	0.226113		rs2882080	3	0.869865	0.00226202	0.707684
BYSL	ENSG00000112578	protein_coding	bystin-like		319.56	0.342354	0.0210947	0.226113		rs2236046	6	-0.315901	0.000126874	0.311432
TFB2M	ENSG00000162851	protein_coding	transcription factor B2, mitochondrial		253.777	0.280133	0.0211211	0.226113		kgp11947916	1	-0.246945	0.00188834	0.687502
TOR3A	ENSG00000186283	protein_coding	torsin family 3, member A		1015.15	0.256815	0.0211349	0.226113		kgp8495203	1	-0.241398	0.0201024	0.887524
P2RY10	ENSG00000078589	protein_coding	purinergic receptor P2Y, G-protein coupled, 10		121.335	-0.472407	0.0211317	0.226113		-	-	-	-	-
COMMD5	ENSG00000170619	protein_coding	COMM domain containing 5		692.141	0.265268	0.0212069	0.226636		rs35756786	8	-0.191508	0.0119731	0.854045
RP11-384K66	ENSG00000260404	lincRNA			224.447	-0.313909	0.0211984	0.226636		rs10021843	4	-0.189632	0.0146896	0.868275
EIF4E	ENSG00000151247	protein_coding	eukaryotic translation initiation factor 4E		1965.64	0.349936	0.0212462	0.226934		rs6846417	4	-0.431932	0.00102191	0.611335
NCF1	ENSG00000158517	protein_coding	neutrophil cytosolic factor 1		10538	-0.505344	0.0212834	0.227084		rs2267824	7	-0.708309	0.0406806	0.920928
TLR10	ENSG00000174123	protein_coding	toll-like receptor 10		74.0426	-0.50943	0.0212834	0.227084		rs7658907	4	0.39348	0.00235405	0.711744
ITLN1	ENSG00000179914	protein_coding	intelectin 1 (galactofuranose binding)		1.86983	-0.548177	0.0212968	0.227104		-	-	-	-	-
RP11-366L202	ENSG00000197301	antisense			19.2011	0.548644	0.0213328	0.227345		kgp4002302	12	0.393683	0.00146369	0.655712
AC0168317	ENSG00000233559	lincRNA			3.94554	0.535938	0.0213425	0.227345		rs1047456	7	0.14322	0.00865505	0.832878
FAM122C	ENSG00000156500	protein_coding	family with sequence similarity 122C		48.5886	-0.35397	0.0213631	0.227442		-	-	-	-	-
TIGD5	ENSG00000179886	protein_coding	tigger transposable element derived 5		116.34	0.349624	0.0214045	0.227759		kgp3265189	8	-0.20303	0.00298265	0.73991
ANKRD36B	ENSG00000196912	protein_coding	ankyrin repeat domain 36B		120.617	-0.33906	0.0214701	0.228334		kgp11681729	2	-0.204227	0.0174108	0.878563
LRRCC1	ENSG00000133739	protein_coding	leucine rich repeat and coiled-coil centrosomal protein 1		143.628	-0.410772	0.0215393	0.228947		kgp3361647	8	-0.331179	0.0274278	0.903124
PDE4A	ENSG00000065989	protein_coding	phosphodiesterase 4A, cAMP-specific		1328.59	0.2565	0.0215692	0.229017		kgp3394810	19	0.224768	0.0041599	0.771127
ST6GAL1	ENSG00000073849	protein_coding	ST6 beta-galactosamide alpha-2,6-sialyltranferase 1		1559.42	-0.3352	0.0215606	0.229017		kgp3049945	3	0.338374	0.000633696	0.541894
MRPL23	ENSG00000214026	protein_coding	mitochondrial ribosomal protein L23		432.878	0.181691	0.0215971	0.22919		kgp2039635	11	0.141183	0.00532358	0.791316
CTC-425O235	ENSG00000279759	TEC			52.7094	-0.294308	0.0216189	0.229298		-	-	-	-	-
RIT1	ENSG00000143622	protein_coding	Ras-like without CAAX 1		3899.19	0.224185	0.0216451	0.229328		rs12408758	1	0.148432	0.0249274	0.898291
RAD23B	ENSG00000119318	protein_coding	RAD23 homolog B (S. cerevisiae)		3498.7	0.105989	0.0216412	0.229328		kgp3662930	9	0.137641	0.000145278	0.330711
RP11-192H234	ENSG00000258472	protein_coding	Uncharacterized protein {ECO:0000313|Ensembl:ENSP00000431165}		29.5393	-0.291128	0.0216882	0.229661		-	-	-	-	-
SNHG22	ENSG00000267322	antisense	small nucleolar RNA host gene 22 (non-protein coding)		3.51139	-0.498347	0.0217029	0.229694		kgp10690303	18	0.338031	0.00139656	0.649358
KLC1	ENSG00000126214	protein_coding	kinesin light chain 1		2206.05	0.123235	0.0217261	0.229816		kgp2138987	14	0.099179	0.00342904	0.752142
MRPL53	ENSG00000204822	protein_coding	mitochondrial ribosomal protein L53		347.027	0.152792	0.0217538	0.229862		rs4853131	2	0.104939	0.00672166	0.812354
ZNF818P	ENSG00000269001	processed_pseudogene	zinc finger protein 818, pseudogene		15.2721	-0.404688	0.021748	0.229862		rs11672737	19	-0.541371	0.000249508	0.411998
LMO7	ENSG00000136153	protein_coding	LIM domain 7		99.6315	-0.358054	0.0217676	0.229885		rs9543854	13	0.369712	0.00094331	0.597836
SBSN	ENSG00000189001	protein_coding	suprabasin		1.75375	0.516107	0.0217988	0.230091		-	-	-	-	-
SLC31A2	ENSG00000136867	protein_coding	solute carrier family 31 (copper transporter), member 2		2863.49	-0.366802	0.0218207	0.230175		kgp8955969	9	0.458517	0.0014989	0.658803
COL9A3	ENSG00000092758	protein_coding	collagen, type IX, alpha 3		14.6084	-0.534168	0.0218301	0.230175		-	-	-	-	-
DDIT4	ENSG00000168209	protein_coding	DNA-damage-inducible transcript 4		695.311	0.42092	0.0218443	0.230201		rs1665688	10	-0.499351	0.000985382	0.605409
DNAJB4	ENSG00000162616	protein_coding	DnaJ (Hsp40) homolog, subfamily B, member 4		409.436	0.335884	0.0218579	0.230221		rs17380036	1	-0.336707	0.0018215	0.683725
CD93	ENSG00000125810	protein_coding	CD93 molecule		3352.42	0.490936	0.0218831	0.230363		kgp5496018	20	-0.549418	0.00801377	0.826395
GBE1	ENSG00000114480	protein_coding	glucan (1,4-alpha-), branching enzyme 1		1240.76	0.359264	0.0219178	0.230606		rs7624419	3	-0.272386	0.00924453	0.837086
FBN1	ENSG00000166147	protein_coding	fibrillin 1		16.3213	-0.458626	0.0219319	0.230631		-	-	-	-	-
YTHDC2	ENSG00000047188	protein_coding	YTH domain containing 2		932.133	-0.242756	0.0219591	0.230678		kgp9703085	5	0.140366	0.00107571	0.615427
LYNX1	ENSG00000180155	protein_coding	Ly6/neurotoxin 1		140.383	-0.444808	0.0219599	0.230678		rs2717586	8	0.45372	1.37807e-05	0.0899935
MMP2	ENSG00000087245	protein_coding	matrix metallopeptidase 2 (gelatinase A, 72kDa gelatinase, 72kDa type IV collagenase)		614.885	0.445384	0.0219848	0.230694		rs12931301	16	0.609013	0.00180615	0.682648
LRRC2	ENSG00000163827	protein_coding	leucine rich repeat containing 2		9.98655	-0.428397	0.0219824	0.230694		-	-	-	-	-
ATOX1	ENSG00000177556	protein_coding	antioxidant 1 copper chaperone		1529.65	-0.231559	0.022073	0.23125		kgp2110821	5	-0.377017	0.00493494	0.784702
CLECL1	ENSG00000184293	protein_coding	C-type lectin-like 1		81.3753	-0.428528	0.0220723	0.23125		kgp10171637	12	-0.461021	0.00104118	0.612391
MMP25-AS1	ENSG00000261971	antisense	MMP25 antisense RNA 1		80.7967	-0.456117	0.0220562	0.23125		rs6500743	16	-0.411781	0.00215627	0.702237
ARF5	ENSG00000004059	protein_coding	ADP-ribosylation factor 5		1375.18	0.13124	0.0221622	0.231979		kgp9401891	7	-0.113438	0.00356948	0.755247
ZDHHC15	ENSG00000102383	protein_coding	zinc finger, DHHC-type containing 15		1.5003	-0.534745	0.0221662	0.231979		-	-	-	-	-
EIF4ENIF1	ENSG00000184708	protein_coding	eukaryotic translation initiation factor 4E nuclear import factor 1		506.483	0.167683	0.0221857	0.232061		rs5998161	22	-0.223595	0.00282036	0.73383
HCFC1R1	ENSG00000103145	protein_coding	host cell factor C1 regulator 1 (XPO1 dependent)		549.986	0.265614	0.0222295	0.23234		kgp8785803	16	0.194076	0.00582094	0.799105
GAPDH	ENSG00000111640	protein_coding	glyceraldehyde-3-phosphate dehydrogenase		50345.5	0.196113	0.0222529	0.23234		rs1468603	12	-0.144701	0.00917252	0.836771
CDC7	ENSG00000097046	protein_coding	cell division cycle 7		65.762	-0.384698	0.0222545	0.23234		kgp10959657	1	-0.244418	0.000426763	0.491412
GIMAP7	ENSG00000179144	protein_coding	GTPase, IMAP family member 7		524.821	-0.47878	0.0222596	0.23234		rs4077601	7	-0.638571	0.00116532	0.62269
C12orf50	ENSG00000165805	protein_coding	chromosome 12 open reading frame 50		1.02464	0.544801	0.0222779	0.232407		-	-	-	-	-
MYO1B	ENSG00000128641	protein_coding	myosin IB		1384.42	0.508383	0.0223039	0.232555		rs7556774	2	-0.696216	0.0059687	0.801659
OTOA	ENSG00000155719	protein_coding	otoancorin		93.4587	0.474326	0.0223221	0.232622		rs7194021	16	-0.400081	0.00496631	0.785478
MRPS17	ENSG00000239789	protein_coding	mitochondrial ribosomal protein S17		192.751	0.236312	0.0223542	0.23271		kgp1300753	7	0.209024	0.00946966	0.83893
ENTPD4	ENSG00000197217	protein_coding	ectonucleoside triphosphate diphosphohydrolase 4		1575.34	-0.254351	0.022352	0.23271		rs3824220	8	-0.203634	0.00332145	0.748618
C11orf68	ENSG00000175573	protein_coding	chromosome 11 open reading frame 68		469.085	0.194641	0.0223743	0.232797		rs44205	11	-0.179002	0.00199375	0.691429
DEF8	ENSG00000140995	protein_coding	differentially expressed in FDCP 8 homolog (mouse)		1204.56	0.206364	0.0224086	0.23303		kgp4761764	16	-0.300843	0.00181908	0.683657
WASF1	ENSG00000112290	protein_coding	WAS protein family, member 1		67.4813	0.416107	0.022478	0.233185		rs2503765	6	0.326026	0.00976646	0.841817
PMM2	ENSG00000140650	protein_coding	phosphomannomutase 2		1000.31	0.288333	0.0224827	0.233185		rs8046099	16	0.366569	0.000485653	0.510598
C2orf47	ENSG00000162972	protein_coding	chromosome 2 open reading frame 47		208.176	0.146147	0.0224693	0.233185		rs13019534	2	-0.15512	0.00116533	0.62269
TRBV4-1	ENSG00000211710	TR_V_gene	T cell receptor beta variable 4-1		7.67583	-0.518879	0.0224781	0.233185		rs1800907	7	0.47216	0.00272993	0.729991
SPIB	ENSG00000269404	protein_coding	Spi-B transcription factor (Spi-1/PU.1 related)		88.6072	-0.523493	0.0224436	0.233185		kgp10566320	19	0.839568	0.00629698	0.805797
WDR45B	ENSG00000141580	protein_coding	WD repeat domain 45B		1635.85	0.205079	0.0225219	0.23347		kgp7559158	17	-0.14022	0.000581551	0.533103
JDP2	ENSG00000140044	protein_coding	Jun dimerization protein 2		1401.11	0.445551	0.0226001	0.233835		kgp6896146	14	0.606516	0.000629276	0.54063
CHERP	ENSG00000085872	protein_coding	calcium homeostasis endoplasmic reticulum protein		848.089	0.197969	0.0226165	0.233835		kgp2483704	19	0.189859	0.00022511	0.396906
BTAF1	ENSG00000095564	protein_coding	BTAF1 RNA polymerase II, B-TFIID transcription factor-associated, 170kDa		2798.49	-0.197398	0.0225732	0.233835		rs1622656	10	-0.209572	0.0141846	0.866428
SFXN2	ENSG00000156398	protein_coding	sideroflexin 2		149.327	-0.377777	0.0225828	0.233835		rs2902548	10	-0.503651	0.000296185	0.438637
FRMD3	ENSG00000172159	protein_coding	FERM domain containing 3		56.442	-0.470359	0.0226159	0.233835		-	-	-	-	-
USP31	ENSG00000103404	protein_coding	ubiquitin specific peptidase 31		302.802	0.266341	0.0226398	0.233875		kgp4896926	16	0.23845	0.00361472	0.757692
ARHGEF5	ENSG00000050327	protein_coding	Rho guanine nucleotide exchange factor (GEF) 5		60.2679	-0.417284	0.022647	0.233875		-	-	-	-	-
RP13-297E164	ENSG00000223511	lincRNA			3.01756	-0.525336	0.022656	0.233875		-	-	-	-	-
PAXIP1-AS2	ENSG00000214106	antisense	PAXIP1 antisense RNA 2		116.92	-0.252395	0.0227447	0.234668		rs11771552	7	0.257234	1.82687e-05	0.108047
PPP1R14C	ENSG00000198729	protein_coding	protein phosphatase 1, regulatory (inhibitor) subunit 14C		46.8065	0.470506	0.0228208	0.234837		rs628577	6	-0.333779	0.000469875	0.505932
SHC1	ENSG00000160691	protein_coding	SHC (Src homology 2 domain containing) transforming protein 1		1423.13	0.135531	0.0228153	0.234837		kgp8676711	1	0.116237	0.0150977	0.87007
UBE2I	ENSG00000103275	protein_coding	ubiquitin-conjugating enzyme E2I		2003.42	0.105139	0.0228059	0.234837		rs2745111	16	0.161844	0.000877961	0.588118
PSME1	ENSG00000092010	protein_coding	proteasome (prosome, macropain) activator subunit 1 (PA28 alpha)		3461.05	-0.403496	0.0228141	0.234837		rs12435647	14	0.379983	0.0145781	0.867978
CD3E	ENSG00000198851	protein_coding	CD3e molecule, epsilon (CD3-TCR complex)		448.312	-0.456378	0.0227902	0.234837		rs12804550	11	-0.647668	0.00156979	0.664262
DNAH17	ENSG00000187775	protein_coding	dynein, axonemal, heavy chain 17		27.1001	0.517003	0.0229109	0.235609		-	-	-	-	-
CCDC116	ENSG00000161180	protein_coding	coiled-coil domain containing 116		1.48017	-0.530951	0.0229197	0.235609		-	-	-	-	-
CST3	ENSG00000101439	protein_coding	cystatin C		12699.4	0.402604	0.0230003	0.236191		kgp9698503	20	-0.318688	0.00722378	0.818296
LINC00607	ENSG00000235770	lincRNA	long intergenic non-protein coding RNA 607		29.1469	-0.483919	0.0229978	0.236191		kgp12570874	2	0.288128	0.000816966	0.575777
RAPGEF1	ENSG00000107263	protein_coding	Rap guanine nucleotide exchange factor (GEF) 1		12549.4	0.149277	0.0230238	0.236246		rs1056171	9	0.141438	0.00333443	0.748954
GOLGB1	ENSG00000173230	protein_coding	golgin B1		2214.08	-0.16914	0.0230417	0.236246		rs4437078	3	0.158381	0.00158546	0.665195
CD80	ENSG00000121594	protein_coding	CD80 molecule		1391.94	-0.471268	0.0230409	0.236246		rs6438537	3	0.844395	0.000685396	0.552631
MED21	ENSG00000152944	protein_coding	mediator complex subunit 21		305.121	0.168235	0.023073	0.236444		kgp7135797	12	0.157334	0.00203342	0.693909
LYPD1	ENSG00000150551	protein_coding	LY6/PLAUR domain containing 1		18.0584	0.529614	0.0231352	0.236589		-	-	-	-	-
MEPCE	ENSG00000146834	protein_coding	methylphosphate capping enzyme		849.334	0.176895	0.0231059	0.236589		kgp11826463	7	-0.105667	0.0164627	0.875876
STAG3L5P-PVRIG2P-PILRB	ENSG00000272752	protein_coding	STAG3L5P-PVRIG2P-PILRB readthrough		221.14	-0.33461	0.0231274	0.236589		kgp10052145	7	0.271974	0.0245602	0.897293
ARHGAP42	ENSG00000165895	protein_coding	Rho GTPase activating protein 42		7.87684	-0.47149	0.023121	0.236589		-	-	-	-	-
ATF7IP2	ENSG00000166669	protein_coding	activating transcription factor 7 interacting protein 2		151.289	-0.268537	0.0232818	0.237965		kgp9705725	16	0.253589	0.00183165	0.684141
ST13P6	ENSG00000225259	processed_pseudogene	suppression of tumorigenicity 13 (colon carcinoma) (Hsp70 interacting protein) pseudogene 6		5.3053	0.454113	0.0233507	0.238059		kgp10823123	8	-0.196862	0.00255676	0.723765
YWHAE	ENSG00000108953	protein_coding	tyrosine 3-monooxygenase/tryptophan 5-monooxygenase activation protein, epsilon		5780.46	0.14446	0.0233303	0.238059		rs3744755	17	-0.104658	0.00234265	0.710722
MAP3K7	ENSG00000135341	protein_coding	mitogen-activated protein kinase kinase kinase 7		1157.7	0.128893	0.0233259	0.238059		kgp897129	6	-0.0969543	0.00601074	0.802352
LDOC1	ENSG00000182195	protein_coding	leucine zipper, down-regulated in cancer 1		10.8698	-0.428669	0.023344	0.238059		-	-	-	-	-
RMI2	ENSG00000175643	protein_coding	RecQ mediated genome instability 2		73.1636	-0.488497	0.0233514	0.238059		rs17696760	16	0.810062	0.00397351	0.766347
INPP4B	ENSG00000109452	protein_coding	inositol polyphosphate-4-phosphatase, type II, 105kDa		165.436	-0.424742	0.0234101	0.238533		kgp2642984	4	0.34341	0.000109495	0.292228
SRSF12	ENSG00000154548	protein_coding	serine/arginine-rich splicing factor 12		29.6144	0.498552	0.0235786	0.238661		-	-	-	-	-
STEAP1	ENSG00000164647	protein_coding	six transmembrane epithelial antigen of the prostate 1		67.4812	0.491405	0.0236022	0.238661		rs2188679	7	-0.453751	0.00548578	0.793502
FAM179A	ENSG00000189350	protein_coding	family with sequence similarity 179, member A		32.8054	0.460236	0.0235702	0.238661		-	-	-	-	-
DYNLL1-AS1	ENSG00000248008	antisense	DYNLL1 antisense RNA 1		83.5369	0.358055	0.0235162	0.238661		rs7959743	12	0.407111	0.00114339	0.620878
FMO5	ENSG00000131781	protein_coding	flavin containing monooxygenase 5		61.4058	0.353576	0.0236165	0.238661		rs10494247	1	0.179677	0.0238867	0.89618
TMEM206	ENSG00000065600	protein_coding	transmembrane protein 206		721.039	0.320137	0.0235094	0.238661		kgp2871736	1	-0.29992	0.00058625	0.534513
ANKRD54	ENSG00000100124	protein_coding	ankyrin repeat domain 54		230.676	0.196331	0.0235184	0.238661		rs2097455	22	0.236827	0.000878003	0.588118
BAHD1	ENSG00000140320	protein_coding	bromo adjacent homology domain containing 1		790.337	0.194304	0.023582	0.238661		rs11070236	15	-0.125723	0.0101013	0.843879
YWHAG	ENSG00000170027	protein_coding	tyrosine 3-monooxygenase/tryptophan 5-monooxygenase activation protein, gamma		10599	0.189638	0.0234788	0.238661		kgp12165764	7	0.156189	0.000815635	0.575777
UXT	ENSG00000126756	protein_coding	ubiquitously-expressed, prefoldin-like chaperone		588.061	0.187531	0.0235617	0.238661		-	-	-	-	-
TERF2	ENSG00000132604	protein_coding	telomeric repeat binding factor 2		469.929	0.177903	0.023454	0.238661		kgp6740869	16	0.209806	0.0123566	0.856223
TCFL5	ENSG00000101190	protein_coding	transcription factor-like 5 (basic helix-loop-helix)		85.008	-0.233186	0.0235415	0.238661		kgp10873462	20	-0.188757	0.000523888	0.521778
AAK1	ENSG00000115977	protein_coding	AP2 associated kinase 1		1389.72	-0.245487	0.0235274	0.238661		kgp4912520	2	0.225661	0.00312858	0.743584
STX17	ENSG00000136874	protein_coding	syntaxin 17		348.131	-0.267687	0.0236131	0.238661		rs10819800	9	0.189711	0.0200142	0.887493
RGS3	ENSG00000138835	protein_coding	regulator of G-protein signaling 3		382.403	-0.413977	0.0236004	0.238661		rs7852613	9	0.707396	0.000100414	0.279535
RP11-861A133	ENSG00000279277	TEC			10.0602	-0.463595	0.0234968	0.238661		-	-	-	-	-
AURKB	ENSG00000178999	protein_coding	aurora kinase B		51.6463	-0.48309	0.0236445	0.238797		kgp10192217	17	-0.57295	0.000824846	0.577456
AC0039733	ENSG00000279377	TEC			8.61964	-0.485242	0.0236542	0.238797		-	-	-	-	-
ZFP36L1	ENSG00000185650	protein_coding	ZFP36 ring finger protein-like 1		3143.55	0.306068	0.0236757	0.238892		rs12887372	14	-0.438003	3.54292e-05	0.158744
CEBPG	ENSG00000153879	protein_coding	CCAAT/enhancer binding protein (C/EBP), gamma		802.806	0.172245	0.0237171	0.239064		rs33847	19	0.210869	0.0023627	0.712641
SSPN	ENSG00000123096	protein_coding	sarcospan		54.135	-0.501855	0.0237151	0.239064		-	-	-	-	-
MZT2A	ENSG00000173272	protein_coding	mitotic spindle organizing protein 2A		195.083	0.342779	0.023736	0.239133		rs16856192	2	0.532804	0.00281361	0.733502
CEMIP	ENSG00000103888	protein_coding	cell migration inducing protein, hyaluronan binding		337.241	0.466344	0.0237732	0.239385		kgp2163273	15	0.434587	0.0026407	0.726804
CTD-2184D35	ENSG00000259712	antisense			5.66387	0.525311	0.0238791	0.239961		kgp10495648	15	0.442464	0.0100271	0.843669
GRWD1	ENSG00000105447	protein_coding	glutamate-rich WD repeat containing 1		657.649	0.278293	0.023857	0.239961		rs8100261	19	0.195178	0.00454573	0.777328
SLC25A40	ENSG00000075303	protein_coding	solute carrier family 25, member 40		870.405	-0.288044	0.0238509	0.239961		kgp6962719	7	-0.232764	0.0080554	0.826946
GAREML	ENSG00000157833	protein_coding	GRB2 associated, regulator of MAPK1-like		23.1384	-0.44069	0.0238753	0.239961		-	-	-	-	-
SYNJ2	ENSG00000078269	protein_coding	synaptojanin 2		371.185	0.462678	0.0239129	0.239991		rs9331344	6	0.595873	0.000952569	0.599917
DUSP8P5	ENSG00000235316	processed_pseudogene	dual specificity phosphatase 8 pseudogene 5		80.4096	0.418846	0.0239407	0.239991		-	-	-	-	-
RP11-452F193	ENSG00000228106	lincRNA			76.8259	0.394733	0.0239424	0.239991		rs11118895	1	0.415785	0.00122855	0.630379
FAM117B	ENSG00000138439	protein_coding	family with sequence similarity 117, member B		80.8552	-0.384426	0.0239431	0.239991		-	-	-	-	-
CAPNS2	ENSG00000256812	protein_coding	calpain, small subunit 2		3.96322	-0.472882	0.0239237	0.239991		-	-	-	-	-
RP11-150O126	ENSG00000253414	sense_intronic			2.89304	0.539495	0.0239755	0.240194		rs28380463	8	0.295129	0.00243036	0.716165
MRPL54	ENSG00000183617	protein_coding	mitochondrial ribosomal protein L54		355.089	0.194293	0.0240257	0.240483		rs13960	19	-0.197856	0.000132058	0.316916
AP0012584	ENSG00000245571	lincRNA			33.4577	-0.315939	0.0240288	0.240483		rs10792180	11	-0.193339	0.0064643	0.809239
RP11-22B231	ENSG00000111788	unprocessed_pseudogene			31.5676	-0.420242	0.024115	0.240964		kgp1193528	12	0.240293	4.38565e-07	0.00753597
LCK	ENSG00000182866	protein_coding	LCK proto-oncogene, Src family tyrosine kinase		418.588	-0.448044	0.0241257	0.240964		kgp11256458	1	-0.593293	0.00580191	0.798724
RP4-622L57	ENSG00000224066	antisense			3.91169	-0.450234	0.0241186	0.240964		rs552124	1	0.190326	0.00142314	0.652671
LINC00944	ENSG00000256128	lincRNA	long intergenic non-protein coding RNA 944		2.76164	-0.531957	0.0241187	0.240964		kgp11345047	12	-0.376415	0.00470892	0.781157
UBALD1	ENSG00000153443	protein_coding	UBA-like domain containing 1		241.538	0.272097	0.0242214	0.241797		rs2239316	16	-0.244161	0.00178265	0.680911
ST6GALNAC3	ENSG00000184005	protein_coding	ST6 (alpha-N-acetyl-neuraminyl-2,3-beta-galactosyl-1,3)-N-acetylgalactosaminide alpha-2,6-sialyltransferase 3		13.8391	0.478377	0.0243017	0.242225		-	-	-	-	-
RP11-34P137	ENSG00000238009	lincRNA			25.4679	0.45477	0.0243135	0.242225		kgp9234885	1	0.326519	0.000391223	0.477815
VWA8	ENSG00000102763	protein_coding	von Willebrand factor A domain containing 8		787.136	-0.401258	0.0242779	0.242225		rs1535681	13	0.39927	0.000586699	0.534544
ZNF835	ENSG00000127903	protein_coding	zinc finger protein 835		9.12077	-0.421179	0.0243125	0.242225		-	-	-	-	-
RXRA	ENSG00000186350	protein_coding	retinoid X receptor, alpha		3043.15	0.220265	0.0243368	0.242334		kgp4245072	9	0.290128	0.000445202	0.497515
CDK5RAP3	ENSG00000108465	protein_coding	CDK5 regulatory subunit associated protein 3		1626.34	-0.240246	0.0243804	0.242646		kgp10117106	17	0.20778	0.000453435	0.501
LRRC38	ENSG00000162494	protein_coding	leucine rich repeat containing 38		9.65855	0.514366	0.0243939	0.242657		-	-	-	-	-
ZNF580	ENSG00000213015	protein_coding	zinc finger protein 580		211.226	-0.222001	0.0244553	0.243146		rs1054940	19	-0.209616	0.000140676	0.325673
PPAP2B	ENSG00000162407	protein_coding	phosphatidic acid phosphatase type 2B		529.127	0.446658	0.0245599	0.243208		rs356119	1	0.887954	7.61586e-05	0.244096
HTR7	ENSG00000148680	protein_coding	5-hydroxytryptamine (serotonin) receptor 7, adenylate cyclase-coupled		115.065	0.398499	0.0244999	0.243208		kgp10820911	10	0.275582	0.004179	0.771129
ABHD17C	ENSG00000136379	protein_coding	abhydrolase domain containing 17C		105.356	0.383451	0.0245315	0.243208		kgp8154913	15	0.399245	0.000517538	0.519423
PVRL1	ENSG00000110400	protein_coding	poliovirus receptor-related 1 (herpesvirus entry mediator C)		187.16	0.275214	0.0245851	0.243208		rs12273820	11	-0.251458	0.00159705	0.666332
FEM1A	ENSG00000141965	protein_coding	fem-1 homolog a (C. elegans)		1259.34	0.165881	0.0245653	0.243208		kgp7544775	19	-0.206732	7.73909e-05	0.246159
LANCL2	ENSG00000132434	protein_coding	LanC lantibiotic synthetase component C-like 2 (bacterial)		482.367	0.133783	0.0245089	0.243208		rs616709	7	-0.109144	0.00659711	0.811303
SCAF1	ENSG00000126461	protein_coding	SR-related CTD-associated factor 1		971.767	0.133267	0.0245407	0.243208		rs12974629	19	-0.247497	0.000810427	0.57541
ZNF594	ENSG00000180626	protein_coding	zinc finger protein 594		97.4707	-0.291277	0.024573	0.243208		rs4496220	17	0.194919	0.000590495	0.534843
ZNF665	ENSG00000197497	protein_coding	zinc finger protein 665		20.3883	-0.372384	0.0245307	0.243208		rs11668097	19	0.291307	0.000645192	0.543568
TRBV3-1	ENSG00000237702	TR_V_gene	T cell receptor beta variable 3-1		7.35775	-0.484562	0.0244986	0.243208		kgp7052447	7	-0.499046	0.00157961	0.66485
RNF2	ENSG00000121481	protein_coding	ring finger protein 2		376.774	0.326566	0.024611	0.243235		rs12079081	1	-0.424889	0.000776274	0.569927
FAM195B	ENSG00000225663	protein_coding	family with sequence similarity 195, member B		587.328	0.223913	0.0246125	0.243235		kgp8908362	17	0.196846	0.0012308	0.630462
EMP3	ENSG00000142227	protein_coding	epithelial membrane protein 3		3903.26	0.278955	0.0246481	0.243428		rs8103388	19	0.213542	0.00301829	0.740967
LTB4R	ENSG00000213903	protein_coding	leukotriene B4 receptor		127.48	-0.293183	0.0246567	0.243428		rs2295322	14	-0.246337	0.000260748	0.418369
ANAPC16	ENSG00000166295	protein_coding	anaphase promoting complex subunit 16		947.867	0.157795	0.0246837	0.243572		rs4579857	10	0.169585	0.000587648	0.534544
RP11-1079K103	ENSG00000248714	lincRNA			3.30494	0.491837	0.0247151	0.24376		rs2908435	17	-0.270002	0.00202	0.693218
[truncated: 28,257 more rows]

## Sheet: cis-eQTL results MDMs SSc 
Ensembl Gene ID	HGNC gene symbol	Gene Biotype	cis-regulatory SNP	Chromosome	beta	p-value	FDR
ENSG00000197728	RPS26	protein_coding	rs10876864	12	0.744705	3.57662e-23	2.24225e-16
ENSG00000226752	PSMD5-AS1	antisense	rs4837796	9	0.971945	1.03938e-21	3.25803e-15
ENSG00000273295		lincRNA	rs4822453	22	0.295473	2.11224e-18	4.41401e-12
ENSG00000134202	GSTM3	protein_coding	rs10735234	1	-1.4762	4.67287e-18	7.32378e-12
ENSG00000128283	CDC42EP1	protein_coding	kgp3948966	22	1.50351	6.57257e-18	8.24094e-12
ENSG00000166435	XRRA1	protein_coding	kgp1698213	11	0.988907	2.10873e-17	1.88858e-11
ENSG00000273295		lincRNA	kgp2483354	22	-0.289231	1.95409e-17	1.88858e-11
ENSG00000160221	C21orf33	protein_coding	kgp1329730	21	1.98998	3.21522e-17	2.5196e-11
ENSG00000164308	ERAP2	protein_coding	rs2549782	5	1.68622	5.53133e-17	3.853e-11
ENSG00000236682		lincRNA	rs13429925	2	0.824658	9.12944e-17	5.72342e-11
ENSG00000152760	TCTEX1D1	protein_coding	kgp1266690	1	1.50859	1.40817e-16	8.02555e-11
ENSG00000203875	SNHG5	processed_transcript	kgp5568134	6	-1.17335	1.77598e-16	9.27829e-11
ENSG00000146707	POMZP3	protein_coding	rs17718122	7	0.733216	4.28512e-16	2.06648e-10
ENSG00000218537		protein_coding	rs4822453	22	0.327268	7.04042e-16	3.1527e-10
ENSG00000013573	DDX11	protein_coding	rs10843881	12	0.665676	8.36549e-16	3.49632e-10
ENSG00000006282	SPATA20	protein_coding	rs8076470	17	-0.865115	1.15041e-15	4.24242e-10
ENSG00000187624	C17orf97	protein_coding	kgp6280646	17	0.90625	1.12897e-15	4.24242e-10
ENSG00000141698	NT5C3B	protein_coding	rs7212972	17	0.988574	6.28071e-15	2.11524e-09
ENSG00000273295		lincRNA	rs1006771	22	-0.272172	6.41064e-15	2.11524e-09
ENSG00000241945	PWP2	protein_coding	rs2020945	21	1.20823	7.67303e-15	2.40518e-09
ENSG00000272787		lincRNA	kgp2483354	22	0.494622	9.59503e-15	2.86443e-09
ENSG00000160221	C21orf33	protein_coding	rs2020945	21	1.77954	2.87539e-14	7.83757e-09
ENSG00000218537		protein_coding	kgp2483354	22	-0.31503	2.83344e-14	7.83757e-09
ENSG00000116791	CRYZ	protein_coding	kgp6512496	1	0.786988	3.86037e-14	1.00839e-08
ENSG00000100079	LGALS2	protein_coding	kgp3948966	22	3.12674	4.40152e-14	1.10376e-08
ENSG00000166847	DCTN5	protein_coding	kgp11339243	16	0.400949	5.54332e-14	1.33662e-08
ENSG00000271361	HTATSF1P2	pseudogene	kgp10068445	6	0.963302	9.36136e-14	2.17364e-08
ENSG00000197165	SULT1A2	protein_coding	rs40837	16	0.878827	1.27546e-13	2.85575e-08
ENSG00000273295		lincRNA	rs1007888	22	0.286762	1.99969e-13	4.32291e-08
ENSG00000214401	KANSL1-AS1	antisense	rs415430	17	1.28422	2.11403e-13	4.41776e-08
ENSG00000272787		lincRNA	rs1006771	22	0.470628	2.29708e-13	4.64543e-08
ENSG00000142794	NBPF3	protein_coding	rs1827293	1	-0.672138	5.47493e-13	1.07261e-07
ENSG00000241945	PWP2	protein_coding	rs2255828	21	1.16863	7.30206e-13	1.38721e-07
ENSG00000214425	LRRC37A4P	pseudogene	kgp11905846	17	-0.953475	8.03773e-13	1.48206e-07
ENSG00000272787		lincRNA	rs1007888	22	-0.504135	8.85126e-13	1.58544e-07
ENSG00000272787		lincRNA	rs4822453	22	-0.477155	1.14127e-12	1.98746e-07
ENSG00000197165	SULT1A2	protein_coding	rs3785354	16	0.834257	1.49703e-12	2.53653e-07
ENSG00000236682		lincRNA	rs10928769	2	0.824773	1.66978e-12	2.75478e-07
ENSG00000099974	DDTL	protein_coding	kgp2483354	22	0.598413	2.29514e-12	3.68941e-07
ENSG00000071894	CPSF1	protein_coding	kgp4249972	8	-0.435132	3.67304e-12	5.43737e-07
ENSG00000160221	C21orf33	protein_coding	rs2838469	21	1.55981	3.66741e-12	5.43737e-07
ENSG00000196756	SNHG17	processed_transcript	rs1739652	20	0.906339	3.83029e-12	5.43737e-07
ENSG00000203666	EFCAB2	protein_coding	kgp11685362	1	-0.775767	3.86966e-12	5.43737e-07
ENSG00000214401	KANSL1-AS1	antisense	rs2732651	17	1.14508	3.57811e-12	5.43737e-07
ENSG00000226752	PSMD5-AS1	antisense	rs2416760	9	0.88853	3.98965e-12	5.43737e-07
ENSG00000234431		lincRNA	kgp7052622	2	2.02549	3.97858e-12	5.43737e-07
ENSG00000196653	ZNF502	protein_coding	kgp9130466	3	0.446058	4.24434e-12	5.66139e-07
ENSG00000214425	LRRC37A4P	pseudogene	kgp12019764	17	-0.954652	5.35738e-12	6.99718e-07
ENSG00000134202	GSTM3	protein_coding	kgp2064774	1	-1.29515	5.53888e-12	7.08659e-07
ENSG00000182534	MXRA7	protein_coding	kgp678817	17	1.86291	5.78849e-12	7.11553e-07
ENSG00000197728	RPS26	protein_coding	rs705699	12	0.574005	5.70479e-12	7.11553e-07
ENSG00000166847	DCTN5	protein_coding	kgp7914759	16	0.355308	6.29136e-12	7.58495e-07
ENSG00000214425	LRRC37A4P	pseudogene	rs17690703	17	-0.991829	6.70182e-12	7.92736e-07
ENSG00000152760	TCTEX1D1	protein_coding	kgp4977878	1	1.85003	6.83635e-12	7.93674e-07
ENSG00000214425	LRRC37A4P	pseudogene	rs2732651	17	-1.04692	9.22319e-12	1.05131e-06
ENSG00000260075	NSFP1	pseudogene	rs17698176	17	1.69132	9.74436e-12	1.09088e-06
ENSG00000230658	KLHL7-AS1	lincRNA	kgp3308582	7	0.205814	1.7617e-11	1.93762e-06
ENSG00000146707	POMZP3	protein_coding	kgp7716863	7	0.787245	2.01735e-11	2.18055e-06
ENSG00000174945	AMZ1	protein_coding	kgp4696254	7	1.34196	2.2349e-11	2.37474e-06
ENSG00000174945	AMZ1	protein_coding	rs3996391	7	1.24549	2.92565e-11	3.03374e-06
ENSG00000271361	HTATSF1P2	pseudogene	kgp5637211	6	0.86882	2.95187e-11	3.03374e-06
ENSG00000110455	ACCS	protein_coding	kgp3636855	11	1.04719	4.11934e-11	4.16531e-06
ENSG00000155158	TTC39B	protein_coding	rs4008004	9	-1.11506	4.74106e-11	4.71788e-06
ENSG00000197020	ZNF100	protein_coding	rs7252798	19	-0.444052	5.19385e-11	5.0877e-06
ENSG00000260075	NSFP1	pseudogene	kgp9430507	17	1.49942	7.34482e-11	7.08401e-06
ENSG00000218537		protein_coding	rs1006771	22	-0.282359	7.56077e-11	7.18181e-06
ENSG00000166847	DCTN5	protein_coding	rs249869	16	0.312644	8.35571e-11	7.81844e-06
ENSG00000197728	RPS26	protein_coding	rs877636	12	0.638187	9.40309e-11	8.54345e-06
ENSG00000272221		lincRNA	rs7751505	6	-0.670186	9.35612e-11	8.54345e-06
ENSG00000128283	CDC42EP1	protein_coding	rs2076087	22	1.29257	1.13394e-10	9.87855e-06
ENSG00000214425	LRRC37A4P	pseudogene	kgp2075991	17	-0.9377	1.10408e-10	9.87855e-06
ENSG00000229391	HLA-DRB6	pseudogene	kgp8592787	6	2.10996	1.13453e-10	9.87855e-06
ENSG00000236682		lincRNA	rs4359587	2	0.789618	1.27723e-10	1.09688e-05
ENSG00000142794	NBPF3	protein_coding	kgp2745456	1	0.66815	1.30659e-10	1.09905e-05
ENSG00000242516	LINC00960	lincRNA	rs1813383	3	0.339992	1.31482e-10	1.09905e-05
ENSG00000100362	PVALB	protein_coding	rs4820250	22	1.41194	1.46038e-10	1.20466e-05
ENSG00000197165	SULT1A2	protein_coding	kgp11281254	16	-0.783482	1.74168e-10	1.41804e-05
ENSG00000198468	FLVCR1-AS1	lincRNA	rs1047881	1	0.789085	1.8798e-10	1.51088e-05
ENSG00000172728	FUT10	protein_coding	kgp11513342	8	0.575145	1.91328e-10	1.51832e-05
ENSG00000218537		protein_coding	rs1007888	22	0.301439	2.40664e-10	1.86268e-05
ENSG00000229056		antisense	rs17231419	2	0.780789	2.3986e-10	1.86268e-05
ENSG00000203666	EFCAB2	protein_coding	rs11580510	1	0.735545	2.56052e-10	1.911e-05
ENSG00000214425	LRRC37A4P	pseudogene	kgp10462960	17	-0.952875	2.5403e-10	1.911e-05
ENSG00000228506		antisense	rs6923983	6	0.405865	2.54456e-10	1.911e-05
ENSG00000166435	XRRA1	protein_coding	rs4944961	11	0.929181	2.80079e-10	2.04331e-05
ENSG00000178252	WDR6	protein_coding	rs6791542	3	0.470248	2.82865e-10	2.04331e-05
ENSG00000187624	C17orf97	protein_coding	kgp12286787	17	0.826839	2.83558e-10	2.04331e-05
ENSG00000241945	PWP2	protein_coding	kgp1329730	21	1.14164	2.89254e-10	2.06067e-05
ENSG00000237541	HLA-DQA2	protein_coding	rs647035	6	2.34083	2.98443e-10	2.10224e-05
ENSG00000164308	ERAP2	protein_coding	rs4869315	5	-1.39835	3.24983e-10	2.26376e-05
ENSG00000197165	SULT1A2	protein_coding	rs40831	16	0.816578	3.3011e-10	2.2742e-05
ENSG00000164308	ERAP2	protein_coding	rs9127	5	1.44851	3.66193e-10	2.49537e-05
ENSG00000214174	AMZ2P1	pseudogene	kgp10487162	17	0.755766	3.73988e-10	2.52108e-05
ENSG00000169629	RGPD8	protein_coding	rs6729910	2	-0.813175	4.13211e-10	2.75585e-05
ENSG00000236397	DDX11L2	pseudogene	kgp7797685	2	0.676829	4.31692e-10	2.8488e-05
ENSG00000104689	TNFRSF10A	protein_coding	kgp5526125	8	0.665607	4.5031e-10	2.94071e-05
ENSG00000101307	SIRPB1	protein_coding	kgp1069848	20	1.4599	4.9602e-10	3.17311e-05
ENSG00000128283	CDC42EP1	protein_coding	kgp5731145	22	1.33072	4.95341e-10	3.17311e-05
ENSG00000223496	EXOSC6	protein_coding	kgp11096131	16	0.417769	5.1302e-10	3.21622e-05
ENSG00000236682		lincRNA	kgp4979113	2	0.738335	5.12663e-10	3.21622e-05
ENSG00000263335		antisense	rs16967494	16	0.578899	5.58835e-10	3.46875e-05
ENSG00000183628	DGCR6	protein_coding	rs418623	22	-0.49389	6.23232e-10	3.83055e-05
ENSG00000172728	FUT10	protein_coding	rs6982159	8	0.532072	6.29582e-10	3.83201e-05
ENSG00000197165	SULT1A2	protein_coding	rs11646653	16	0.78973	6.64653e-10	4.00657e-05
ENSG00000158623	COPG2	protein_coding	rs3847101	7	-0.584717	7.04403e-10	4.20575e-05
ENSG00000163536	SERPINI1	protein_coding	kgp3165196	3	1.49903	7.51958e-10	4.44733e-05
ENSG00000187824	TMEM220	protein_coding	kgp22831031	17	0.691652	8.43323e-10	4.94108e-05
ENSG00000229391	HLA-DRB6	pseudogene	rs9268839	6	2.13303	8.62029e-10	5.00391e-05
ENSG00000131849	ZNF132	protein_coding	rs3764533	19	0.305266	1.09044e-09	6.15871e-05
ENSG00000166896	XRCC6BP1	protein_coding	rs10877041	12	-0.506669	1.08671e-09	6.15871e-05
ENSG00000198468	FLVCR1-AS1	lincRNA	rs12140722	1	0.683608	1.07524e-09	6.15871e-05
ENSG00000271361	HTATSF1P2	pseudogene	kgp4424323	6	0.794704	1.11707e-09	6.25277e-05
ENSG00000256001		lincRNA	kgp12356806	12	2.03385	1.13913e-09	6.31986e-05
ENSG00000203875	SNHG5	processed_transcript	kgp4854182	6	-0.827577	1.1847e-09	6.50183e-05
ENSG00000214174	AMZ2P1	pseudogene	kgp3463056	17	0.701905	1.19267e-09	6.50183e-05
ENSG00000226752	PSMD5-AS1	antisense	kgp11810088	9	0.776249	1.2105e-09	6.5421e-05
ENSG00000160223	ICOSLG	protein_coding	kgp5479603	21	0.884166	1.40822e-09	7.54565e-05
ENSG00000241945	PWP2	protein_coding	rs2838469	21	0.959614	1.57118e-09	8.34746e-05
ENSG00000203875	SNHG5	processed_transcript	kgp213062	6	-0.947237	1.69893e-09	8.95037e-05
ENSG00000065060	UHRF1BP1	protein_coding	rs2764211	6	0.3579	1.71719e-09	8.97117e-05
ENSG00000169629	RGPD8	protein_coding	kgp6282537	2	-0.546385	1.79594e-09	9.30506e-05
ENSG00000099974	DDTL	protein_coding	rs1007888	22	-0.578307	1.82275e-09	9.36651e-05
ENSG00000198502	HLA-DRB5	protein_coding	rs3828840	6	3.28937	1.89732e-09	9.67046e-05
ENSG00000272221		lincRNA	rs2523484	6	-0.629686	1.93833e-09	9.79981e-05
ENSG00000179344	HLA-DQB1	protein_coding	kgp10685071	6	2.87738	2.02707e-09	0.000101665
ENSG00000160223	ICOSLG	protein_coding	kgp10428512	21	0.940964	2.34233e-09	0.000116544
ENSG00000241945	PWP2	protein_coding	kgp869606	21	1.11581	2.61479e-09	0.000128067
ENSG00000250312	ZNF718	lincRNA	rs6830247	4	0.51088	2.59783e-09	0.000128067
ENSG00000203875	SNHG5	processed_transcript	kgp6036100	6	-0.990183	2.69415e-09	0.000129924
ENSG00000226334		antisense	rs7023634	9	0.628283	2.69242e-09	0.000129924
ENSG00000100079	LGALS2	protein_coding	kgp5731145	22	2.85794	2.74675e-09	0.000131449
ENSG00000160221	C21orf33	protein_coding	rs2255828	21	1.54636	3.15561e-09	0.000149872
ENSG00000164308	ERAP2	protein_coding	rs1230361	5	1.47626	3.26845e-09	0.000154064
ENSG00000160221	C21orf33	protein_coding	kgp3186432	21	1.84064	3.32188e-09	0.000155414
ENSG00000196526	AFAP1	protein_coding	kgp4202973	4	0.608717	3.61321e-09	0.000167792
ENSG00000214078	CPNE1	protein_coding	rs7270009	20	-0.502964	3.715e-09	0.000171251
ENSG00000250312	ZNF718	lincRNA	rs7699689	4	0.374498	3.97795e-09	0.000182033
ENSG00000160223	ICOSLG	protein_coding	kgp1573319	21	-0.908406	4.14382e-09	0.000187853
ENSG00000182362	YBEY	protein_coding	kgp10787680	21	-0.491982	4.19224e-09	0.000187853
ENSG00000197165	SULT1A2	protein_coding	rs8049439	16	0.796902	4.19503e-09	0.000187853
ENSG00000196236	XPNPEP3	protein_coding	rs138354	22	-0.452822	4.60462e-09	0.000204732
ENSG00000100376	FAM118A	protein_coding	rs136584	22	1.38621	4.6993e-09	0.000207471
ENSG00000134202	GSTM3	protein_coding	kgp10666312	1	-1.11189	5.38355e-09	0.000232762
ENSG00000166847	DCTN5	protein_coding	rs26763	16	0.304211	5.35541e-09	0.000232762
ENSG00000214401	KANSL1-AS1	antisense	kgp12019764	17	0.928739	5.31464e-09	0.000232762
ENSG00000160223	ICOSLG	protein_coding	kgp9647597	21	0.88742	5.49479e-09	0.000235945
ENSG00000198468	FLVCR1-AS1	lincRNA	kgp9740197	1	-0.605744	5.54879e-09	0.000236643
ENSG00000146707	POMZP3	protein_coding	rs10280733	7	0.702372	5.58859e-09	0.000236729
ENSG00000099974	DDTL	protein_coding	rs1006771	22	0.520729	5.94761e-09	0.000250246
ENSG00000166435	XRRA1	protein_coding	rs3814726	11	0.774505	6.40491e-09	0.000267691
ENSG00000091073	DTX2	protein_coding	rs10224066	7	0.411922	6.96648e-09	0.00028733
ENSG00000170837	GPR27	protein_coding	kgp2193922	3	0.729606	6.923e-09	0.00028733
ENSG00000272221		lincRNA	rs1051794	6	-0.564676	7.03372e-09	0.000288207
ENSG00000263335		antisense	kgp7668500	16	0.552316	7.25982e-09	0.00029554
ENSG00000236397	DDX11L2	pseudogene	rs2900745	2	0.52468	7.4445e-09	0.000301103
ENSG00000071894	CPSF1	protein_coding	kgp11485835	8	-0.379846	8.11619e-09	0.000326167
ENSG00000229153	EPHA1-AS1	antisense	rs11771145	7	0.596289	9.3174e-09	0.000372055
ENSG00000140545	MFGE8	protein_coding	rs3784752	15	0.625947	9.5711e-09	0.000379766
ENSG00000254827	SLC22A18AS	protein_coding	rs367035	11	-0.371376	9.7766e-09	0.00038548
ENSG00000100376	FAM118A	protein_coding	kgp3661295	22	1.30192	1.0048e-08	0.000391259
ENSG00000203875	SNHG5	processed_transcript	rs4296866	6	-0.992092	1.00088e-08	0.000391259
ENSG00000179979	CRIPAK	protein_coding	kgp1832741	4	0.638989	1.01861e-08	0.000394189
ENSG00000124587	PEX6	protein_coding	rs2395943	6	-0.507249	1.06535e-08	0.000409746
ENSG00000233327	USP32P2	pseudogene	kgp6612518	17	-0.862552	1.08732e-08	0.000415647
ENSG00000272221		lincRNA	rs7775759	6	-0.599467	1.1038e-08	0.000419391
ENSG00000175611	LINC00476	processed_transcript	kgp10297018	9	0.484954	1.17813e-08	0.000441926
ENSG00000187824	TMEM220	protein_coding	kgp11406517	17	0.716028	1.17771e-08	0.000441926
ENSG00000198502	HLA-DRB5	protein_coding	rs34369284	6	-2.65603	1.18426e-08	0.000441926
ENSG00000263335		antisense	kgp22838286	16	0.545009	1.22751e-08	0.000455353
ENSG00000106733	NMRK1	protein_coding	rs10869496	9	-0.378907	1.25932e-08	0.000463071
ENSG00000124587	PEX6	protein_coding	rs3763236	6	0.492848	1.26308e-08	0.000463071
ENSG00000141698	NT5C3B	protein_coding	kgp2778642	17	0.84798	1.28645e-08	0.000468896
ENSG00000185245	GP1BA	protein_coding	rs2243102	17	-1.3718	1.30844e-08	0.000474154
ENSG00000152760	TCTEX1D1	protein_coding	kgp9833988	1	1.4798	1.33749e-08	0.000481896
ENSG00000120451	SNX19	protein_coding	rs1865298	11	0.285866	1.40305e-08	0.000502627
ENSG00000187134	AKR1C1	protein_coding	rs12774134	10	2.51571	1.45286e-08	0.000517514
ENSG00000106733	NMRK1	protein_coding	kgp2887924	9	-0.388192	1.48614e-08	0.000526247
ENSG00000226824		sense_intronic	kgp6739308	7	0.891175	1.49416e-08	0.000526247
ENSG00000100362	PVALB	protein_coding	kgp4401682	22	1.23691	1.50673e-08	0.000526755
ENSG00000272221		lincRNA	rs9348866	6	-0.611643	1.51241e-08	0.000526755
ENSG00000187134	AKR1C1	protein_coding	rs7076886	10	1.6809	1.52629e-08	0.000528652
ENSG00000160221	C21orf33	protein_coding	kgp869606	21	1.60301	1.60061e-08	0.000551348
ENSG00000100079	LGALS2	protein_coding	rs2076087	22	2.61942	1.6134e-08	0.000552718
ENSG00000178381	ZFAND2A	protein_coding	rs1880296	7	0.477156	1.66188e-08	0.00056623
ENSG00000273295		lincRNA	rs875643	22	0.236823	1.67804e-08	0.000568648
ENSG00000179979	CRIPAK	protein_coding	kgp7396166	4	0.684837	1.75102e-08	0.000590189
ENSG00000112874	NUDT12	protein_coding	kgp11760830	5	-0.709648	1.82225e-08	0.000610056
ENSG00000196653	ZNF502	protein_coding	kgp596792	3	0.325796	1.84889e-08	0.000610056
ENSG00000196655	TRAPPC4	protein_coding	rs569	11	0.372959	1.84033e-08	0.000610056
ENSG00000243225		pseudogene	rs12889775	14	0.882923	1.83842e-08	0.000610056
ENSG00000197728	RPS26	protein_coding	kgp5883628	12	0.5819	1.88392e-08	0.00061836
ENSG00000230658	KLHL7-AS1	lincRNA	kgp3239768	7	0.182677	1.94879e-08	0.000636319
ENSG00000155158	TTC39B	protein_coding	rs2849049	9	-0.805488	1.98989e-08	0.000643043
ENSG00000239445	ST3GAL6-AS1	antisense	kgp4342480	3	-0.946007	1.98508e-08	0.000643043
ENSG00000110455	ACCS	protein_coding	rs7951555	11	0.764363	2.02017e-08	0.000648417
ENSG00000203875	SNHG5	processed_transcript	rs6922	6	-0.966669	2.02721e-08	0.000648417
ENSG00000172728	FUT10	protein_coding	kgp9129429	8	0.567354	2.05768e-08	0.000654821
ENSG00000230658	KLHL7-AS1	lincRNA	rs10256996	7	0.186385	2.09723e-08	0.000664037
ENSG00000196735	HLA-DQA1	protein_coding	kgp10685071	6	2.82386	2.16489e-08	0.000682016
ENSG00000083828	ZNF586	protein_coding	kgp182154	19	-0.400194	2.23593e-08	0.000694488
ENSG00000101639	CEP192	protein_coding	rs11663049	18	0.465988	2.24235e-08	0.000694488
ENSG00000197165	SULT1A2	protein_coding	rs6565259	16	0.711661	2.24086e-08	0.000694488
ENSG00000234431		lincRNA	rs12693931	2	1.92486	2.24879e-08	0.000694488
ENSG00000129055	ANAPC13	protein_coding	rs7650509	3	-0.314402	2.31373e-08	0.000711041
ENSG00000206341	HLA-H	pseudogene	kgp6234748	6	2.67768	2.33993e-08	0.000715584
ENSG00000166896	XRCC6BP1	protein_coding	rs4630335	12	-0.491879	2.45826e-08	0.000748123
ENSG00000214078	CPNE1	protein_coding	rs6088887	20	-0.469139	2.63061e-08	0.000796707
ENSG00000203875	SNHG5	processed_transcript	kgp5462492	6	-0.955359	2.77602e-08	0.000836702
ENSG00000214401	KANSL1-AS1	antisense	rs17690703	17	0.933986	2.87228e-08	0.000861572
ENSG00000151470	C4orf33	protein_coding	kgp22790328	4	0.357112	2.94052e-08	0.000877843
ENSG00000179163	FUCA1	protein_coding	kgp1774784	1	-1.39256	3.0633e-08	0.000905868
ENSG00000242516	LINC00960	lincRNA	kgp369457	3	0.320646	3.06164e-08	0.000905868
ENSG00000223496	EXOSC6	protein_coding	kgp3773471	16	-0.426656	3.11168e-08	0.000915857
ENSG00000158623	COPG2	protein_coding	rs10863	7	-0.57028	3.2168e-08	0.000942371
ENSG00000116791	CRYZ	protein_coding	kgp3625640	1	-0.684754	3.38901e-08	0.000988202
ENSG00000226334		antisense	rs2422493	9	-0.522024	3.46218e-08	0.00100486
ENSG00000163682	RPL9	protein_coding	rs2249563	4	0.323049	3.62382e-08	0.00104213
ENSG00000196735	HLA-DQA1	protein_coding	kgp7110725	6	2.44074	3.61923e-08	0.00104213
ENSG00000140545	MFGE8	protein_coding	kgp4802106	15	0.580921	4.02327e-08	0.00115172
ENSG00000255893		antisense	rs12224966	11	0.652088	4.12113e-08	0.00117437
ENSG00000270127		lincRNA	rs12460	15	-0.293219	4.1791e-08	0.0011855
ENSG00000101307	SIRPB1	protein_coding	kgp3949443	20	1.02596	4.22494e-08	0.00119311
ENSG00000214174	AMZ2P1	pseudogene	kgp6391664	17	0.764289	4.27093e-08	0.00120069
ENSG00000007129	CEACAM21	protein_coding	rs11083627	19	-0.887402	4.30191e-08	0.00120399
ENSG00000250714		antisense	kgp5526125	8	0.188865	4.76082e-08	0.00132651
ENSG00000239445	ST3GAL6-AS1	antisense	rs4857414	3	-0.928937	4.83283e-08	0.00134062
ENSG00000006282	SPATA20	protein_coding	rs1122634	17	0.765141	5.00474e-08	0.00138097
ENSG00000196526	AFAP1	protein_coding	rs11732351	4	0.543433	5.02234e-08	0.00138097
ENSG00000226232		pseudogene	rs2270843	16	-0.886021	5.29703e-08	0.00145014
ENSG00000273014		lincRNA	kgp12164861	7	0.585164	5.38387e-08	0.0014675
ENSG00000100376	FAM118A	protein_coding	kgp5501282	22	1.34925	5.66117e-08	0.00153641
ENSG00000268362		lincRNA	kgp22796597	19	0.485724	6.03505e-08	0.00163081
ENSG00000104497	SNX16	protein_coding	kgp5445344	8	0.365196	6.21123e-08	0.00166408
ENSG00000155158	TTC39B	protein_coding	rs686030	9	1.22364	6.19121e-08	0.00166408
ENSG00000167815	PRDX2	protein_coding	kgp12371077	19	0.511914	6.30519e-08	0.00167814
ENSG00000272221		lincRNA	rs2394988	6	-0.569471	6.31727e-08	0.00167814
ENSG00000250155		antisense	kgp9074837	5	0.522124	6.59668e-08	0.00174497
ENSG00000228506		antisense	kgp9284209	6	-0.395646	6.6366e-08	0.00174816
ENSG00000099974	DDTL	protein_coding	rs4822453	22	-0.50914	6.74003e-08	0.00176797
ENSG00000229043		antisense	rs1880296	7	0.348675	6.77817e-08	0.00177057
ENSG00000111321	LTBR	protein_coding	rs11064157	12	0.301085	6.98006e-08	0.00181574
ENSG00000120451	SNX19	protein_coding	rs10750449	11	0.271595	7.16005e-08	0.00185487
ENSG00000198502	HLA-DRB5	protein_coding	rs28490179	6	3.24849	7.3471e-08	0.00188772
ENSG00000272221		lincRNA	kgp1455045	6	-0.634727	7.34258e-08	0.00188772
ENSG00000236682		lincRNA	kgp3111501	2	0.630333	7.66134e-08	0.00196042
ENSG00000131849	ZNF132	protein_coding	rs1077420	19	-0.27842	7.86087e-08	0.0019952
ENSG00000155542	SETD9	protein_coding	kgp10651280	5	-0.460854	7.8292e-08	0.0019952
ENSG00000214425	LRRC37A4P	pseudogene	kgp22829000	17	-1.00703	8.22446e-08	0.00207906
ENSG00000116791	CRYZ	protein_coding	kgp3185592	1	-0.60446	8.51542e-08	0.00214397
ENSG00000179344	HLA-DQB1	protein_coding	kgp7110725	6	2.32358	8.71157e-08	0.00218458
ENSG00000129055	ANAPC13	protein_coding	rs6775611	3	-0.337076	8.95053e-08	0.00223556
ENSG00000259448		lincRNA	kgp10654430	15	-0.312448	9.0367e-08	0.00224813
ENSG00000214941	ZSWIM7	protein_coding	kgp1753280	17	0.327816	9.13188e-08	0.00226283
ENSG00000262370		lincRNA	kgp3157016	16	0.414137	9.60273e-08	0.00237013
ENSG00000071894	CPSF1	protein_coding	kgp3913844	8	0.418057	9.9222e-08	0.00243938
ENSG00000214401	KANSL1-AS1	antisense	kgp11905846	17	0.850059	1.0464e-07	0.00256253
ENSG00000250565	ATP6V1E2	protein_coding	rs4142759	2	-0.382505	1.05225e-07	0.00256643
ENSG00000255422		antisense	rs494459	11	-0.976184	1.05618e-07	0.00256643
ENSG00000137285	TUBB2B	protein_coding	rs9405612	6	-0.678709	1.06367e-07	0.00257466
ENSG00000142794	NBPF3	protein_coding	kgp2048809	1	0.575605	1.07394e-07	0.00258951
ENSG00000165948	IFI27L1	protein_coding	kgp3296679	14	-0.466669	1.10579e-07	0.00265319
ENSG00000174945	AMZ1	protein_coding	kgp8751173	7	1.12459	1.10881e-07	0.00265319
ENSG00000137411	VARS2	protein_coding	rs2249464	6	0.359425	1.11665e-07	0.00266179
ENSG00000166847	DCTN5	protein_coding	kgp4450847	16	0.362739	1.12484e-07	0.00267114
ENSG00000230658	KLHL7-AS1	lincRNA	rs2268745	7	0.184145	1.16562e-07	0.00275755
ENSG00000248429		antisense	rs6830702	4	-0.575804	1.28049e-07	0.00301792
ENSG00000196526	AFAP1	protein_coding	kgp3634937	4	-0.507695	1.34827e-07	0.00313058
ENSG00000197165	SULT1A2	protein_coding	kgp99817	16	0.747363	1.34356e-07	0.00313058
ENSG00000229056		antisense	kgp5306263	2	0.810377	1.33824e-07	0.00313058
ENSG00000250565	ATP6V1E2	protein_coding	rs7557190	2	-0.384458	1.34738e-07	0.00313058
ENSG00000242498	C15orf38	protein_coding	kgp2833465	15	-0.454865	1.35395e-07	0.00313218
ENSG00000124140	SLC12A5	protein_coding	rs2236416	20	0.774205	1.36926e-07	0.00315593
ENSG00000083544	TDRD3	protein_coding	kgp10942416	13	1.47121	1.39005e-07	0.00318048
ENSG00000237541	HLA-DQA2	protein_coding	rs660895	6	2.26729	1.38619e-07	0.00318048
ENSG00000007129	CEACAM21	protein_coding	kgp1688663	19	-0.960351	1.40527e-07	0.00320359
ENSG00000166436	TRIM66	protein_coding	rs10840106	11	0.382347	1.43254e-07	0.00325393
ENSG00000203666	EFCAB2	protein_coding	rs10927369	1	0.656898	1.43858e-07	0.00325587
ENSG00000226752	PSMD5-AS1	antisense	rs7861226	9	0.706038	1.49195e-07	0.00335244
ENSG00000237541	HLA-DQA2	protein_coding	rs9271842	6	1.67059	1.49032e-07	0.00335244
ENSG00000160221	C21orf33	protein_coding	rs13048791	21	1.52711	1.502e-07	0.00336296
ENSG00000172728	FUT10	protein_coding	kgp20576768	8	0.561207	1.51812e-07	0.00338696
ENSG00000271361	HTATSF1P2	pseudogene	kgp2746336	6	0.685403	1.54252e-07	0.00342921
ENSG00000110660	SLC35F2	protein_coding	rs593673	11	0.64202	1.55203e-07	0.00343167
ENSG00000203875	SNHG5	processed_transcript	kgp4409522	6	-0.933205	1.56005e-07	0.00343167
ENSG00000214425	LRRC37A4P	pseudogene	kgp3792994	17	-0.714485	1.55767e-07	0.00343167
ENSG00000198496	NBR2	pseudogene	rs799917	17	-0.409157	1.65541e-07	0.00362871
ENSG00000164308	ERAP2	protein_coding	kgp8460982	5	-1.42238	1.70297e-07	0.00371994
ENSG00000160221	C21orf33	protein_coding	rs2838512	21	1.49965	1.72045e-07	0.00374507
ENSG00000196126	HLA-DRB1	protein_coding	rs3828840	6	1.33348	1.83276e-07	0.00397575
ENSG00000142794	NBPF3	protein_coding	rs4654938	1	0.560781	1.87136e-07	0.00403159
ENSG00000142794	NBPF3	protein_coding	kgp8219335	1	0.586188	1.86872e-07	0.00403159
ENSG00000164935	DCSTAMP	protein_coding	rs2514666	8	-1.44344	1.89254e-07	0.00406325
ENSG00000214425	LRRC37A4P	pseudogene	rs2435200	17	-0.830214	1.90548e-07	0.00406517
ENSG00000214425	LRRC37A4P	pseudogene	rs12938031	17	-0.853204	1.9064e-07	0.00406517
ENSG00000182853	VMO1	protein_coding	kgp1753708	17	1.53748	1.95096e-07	0.00414609
ENSG00000198502	HLA-DRB5	protein_coding	rs3129860	6	4.42074	1.96164e-07	0.0041547
ENSG00000186704	DTX2P1	pseudogene	kgp9683009	7	-0.467672	1.99512e-07	0.00421138
ENSG00000165801	ARHGEF40	protein_coding	kgp11842473	14	0.555243	2.00276e-07	0.00421331
ENSG00000250312	ZNF718	lincRNA	rs2353605	4	0.424923	2.04448e-07	0.00428671
ENSG00000259845	HERC2P10	pseudogene	kgp10740022	15	0.20419	2.0854e-07	0.00435792
ENSG00000110455	ACCS	protein_coding	kgp897533	11	0.686848	2.10571e-07	0.00436237
ENSG00000161265	U2AF1L4	protein_coding	rs3848662	19	0.500869	2.1084e-07	0.00436237
ENSG00000226752	PSMD5-AS1	antisense	kgp6036634	9	0.803656	2.1032e-07	0.00436237
ENSG00000198502	HLA-DRB5	protein_coding	rs9268974	6	-2.78626	2.15983e-07	0.00445408
ENSG00000164978	NUDT2	protein_coding	kgp9020698	9	0.473223	2.1706e-07	0.00446162
ENSG00000250155		antisense	kgp1811045	5	0.502685	2.17995e-07	0.00446619
ENSG00000134028	ADAMDEC1	protein_coding	rs2291574	8	-0.796424	2.19971e-07	0.00447226
ENSG00000226334		antisense	rs2043664	9	0.540763	2.19283e-07	0.00447226
ENSG00000250312	ZNF718	lincRNA	kgp2709666	4	0.442625	2.20432e-07	0.00447226
ENSG00000116791	CRYZ	protein_coding	rs10890142	1	0.651924	2.28015e-07	0.00460097
ENSG00000261740		protein_coding	rs6565176	16	-0.434615	2.28243e-07	0.00460097
ENSG00000131849	ZNF132	protein_coding	kgp3869493	19	0.283607	2.29805e-07	0.00461759
ENSG00000176998	HCG4	pseudogene	rs3115627	6	0.471256	2.31305e-07	0.00463289
ENSG00000129055	ANAPC13	protein_coding	kgp10288166	3	-0.317477	2.389e-07	0.00476979
ENSG00000250312	ZNF718	lincRNA	kgp6276074	4	0.460177	2.49754e-07	0.00497065
ENSG00000186704	DTX2P1	pseudogene	rs17718122	7	-0.489212	2.53192e-07	0.00502314
ENSG00000237541	HLA-DQA2	protein_coding	kgp5453888	6	2.25378	2.55023e-07	0.00504349
ENSG00000217825		protein_coding	rs11243342	7	0.675994	2.68018e-07	0.00528382
ENSG00000182362	YBEY	protein_coding	kgp12206975	21	0.363907	2.74214e-07	0.00538903
ENSG00000170430	MGMT	protein_coding	kgp4353710	10	-0.345654	2.79628e-07	0.00544424
ENSG00000179344	HLA-DQB1	protein_coding	kgp2939543	6	2.63136	2.7857e-07	0.00544424
ENSG00000237541	HLA-DQA2	protein_coding	rs9274759	6	1.78247	2.79615e-07	0.00544424
ENSG00000013573	DDX11	protein_coding	rs4931434	12	-0.518635	2.80559e-07	0.00544544
ENSG00000250565	ATP6V1E2	protein_coding	kgp2414429	2	0.333873	2.83362e-07	0.00548287
ENSG00000175611	LINC00476	processed_transcript	rs589458	9	0.479466	2.87481e-07	0.00554546
ENSG00000166896	XRCC6BP1	protein_coding	rs7960942	12	-0.442239	2.89934e-07	0.00557561
ENSG00000175611	LINC00476	processed_transcript	rs1836404	9	-0.446764	2.91287e-07	0.00558416
ENSG00000182534	MXRA7	protein_coding	rs1014390	17	1.53026	2.9216e-07	0.00558416
ENSG00000197728	RPS26	protein_coding	kgp3331064	12	0.577928	2.94762e-07	0.0056039
ENSG00000198496	NBR2	pseudogene	rs11657053	17	-0.396864	2.96043e-07	0.0056039
ENSG00000214894	LINC00243	processed_transcript	rs9368641	6	0.413877	2.96776e-07	0.0056039
ENSG00000242516	LINC00960	lincRNA	rs11706032	3	-0.244931	2.9945e-07	0.0056039
ENSG00000256001		lincRNA	kgp1567554	12	1.43102	2.98617e-07	0.0056039
ENSG00000258602		lincRNA	rs12889775	14	0.523461	2.98184e-07	0.0056039
ENSG00000272221		lincRNA	rs2256175	6	-0.50789	2.97805e-07	0.0056039
ENSG00000129055	ANAPC13	protein_coding	rs4543053	3	-0.344506	3.04168e-07	0.00567526
ENSG00000160223	ICOSLG	protein_coding	rs2329711	21	0.910549	3.05817e-07	0.0056891
ENSG00000197879	MYO1C	protein_coding	rs9303083	17	-0.362956	3.08344e-07	0.00571913
ENSG00000065060	UHRF1BP1	protein_coding	rs205283	6	0.323677	3.17203e-07	0.00586609
ENSG00000211698	TRGV4	TR_V_gene	kgp1168422	7	-0.498179	3.32086e-07	0.00612326
ENSG00000238083	LRRC37A2	protein_coding	rs7225002	17	0.487515	3.33709e-07	0.00613516
ENSG00000166928	MS4A14	protein_coding	rs7952244	11	-0.761849	3.37477e-07	0.00618628
ENSG00000237541	HLA-DQA2	protein_coding	rs566861	6	-1.76879	3.4322e-07	0.00627321
ENSG00000214922	HLA-F-AS1	processed_transcript	rs1611185	6	0.653648	3.54378e-07	0.00645832
ENSG00000211697	TRGV5	TR_V_gene	rs4373430	7	1.21462	3.61526e-07	0.00656949
ENSG00000187824	TMEM220	protein_coding	kgp7079516	17	0.752515	3.72528e-07	0.00674985
ENSG00000174652	ZNF266	protein_coding	rs6512047	19	0.29744	3.76869e-07	0.00680883
ENSG00000134909	ARHGAP32	protein_coding	rs477070	11	0.721542	3.81131e-07	0.00686605
ENSG00000100376	FAM118A	protein_coding	kgp4171247	22	1.17515	3.84175e-07	0.00690105
ENSG00000083828	ZNF586	protein_coding	kgp7174479	19	-0.432071	4.00008e-07	0.00709638
ENSG00000128274	A4GALT	protein_coding	rs7287569	22	0.757527	3.98427e-07	0.00709638
ENSG00000172728	FUT10	protein_coding	rs2043967	8	0.520809	3.96519e-07	0.00709638
ENSG00000179344	HLA-DQB1	protein_coding	rs3096689	6	-2.36804	4.0184e-07	0.00709638
ENSG00000196236	XPNPEP3	protein_coding	kgp1043753	22	0.400534	4.01253e-07	0.00709638
ENSG00000273295		lincRNA	kgp2864929	22	-0.256676	4.00803e-07	0.00709638
ENSG00000132740	IGHMBP2	protein_coding	rs622082	11	0.363991	4.04142e-07	0.00711698
ENSG00000158457	TSPAN33	protein_coding	kgp4164403	7	0.483106	4.12672e-07	0.00722658
ENSG00000162994	CLHC1	protein_coding	kgp4351941	2	0.595105	4.11727e-07	0.00722658
ENSG00000198496	NBR2	pseudogene	kgp4250872	17	-0.440879	4.14974e-07	0.00724667
ENSG00000214078	CPNE1	protein_coding	kgp8075344	20	-0.480568	4.20057e-07	0.00731505
ENSG00000167914	GSDMA	protein_coding	rs3859192	17	-1.40995	4.28068e-07	0.00743391
ENSG00000272221		lincRNA	kgp12044535	6	-0.537415	4.31682e-07	0.00747596
ENSG00000126870	WDR60	protein_coding	kgp7912820	7	-0.455007	4.34884e-07	0.00751066
ENSG00000111788		pseudogene	kgp1193528	12	0.240293	4.38565e-07	0.00753597
ENSG00000260269		processed_transcript	rs11072552	15	0.429585	4.38753e-07	0.00753597
ENSG00000179344	HLA-DQB1	protein_coding	kgp11761937	6	-2.13378	4.44307e-07	0.00761051
ENSG00000241945	PWP2	protein_coding	rs2838512	21	0.981073	4.46196e-07	0.00762204
ENSG00000226752	PSMD5-AS1	antisense	rs3933326	9	0.788143	4.57574e-07	0.00779517
ENSG00000137285	TUBB2B	protein_coding	kgp11759666	6	-0.71237	4.71067e-07	0.00800328
ENSG00000214078	CPNE1	protein_coding	kgp562141	20	-0.455922	4.76203e-07	0.00806867
ENSG00000198502	HLA-DRB5	protein_coding	rs9271347	6	3.98113	4.7995e-07	0.00810241
ENSG00000272979		antisense	rs1866852	2	0.265681	4.80779e-07	0.00810241
ENSG00000166847	DCTN5	protein_coding	rs420259	16	0.270482	4.89661e-07	0.00821651
ENSG00000255422		antisense	rs673770	11	-0.90746	4.9017e-07	0.00821651
ENSG00000236397	DDX11L2	pseudogene	rs4544450	2	0.565621	4.95995e-07	0.00829197
ENSG00000226824		sense_intronic	kgp22729727	7	0.740243	5.12706e-07	0.00853664
ENSG00000250565	ATP6V1E2	protein_coding	rs12997164	2	-0.381927	5.13354e-07	0.00853664
ENSG00000170291	ELP5	protein_coding	rs222836	17	0.238643	5.2024e-07	0.00860112
ENSG00000174652	ZNF266	protein_coding	kgp10637189	19	-0.281957	5.21347e-07	0.00860112
ENSG00000268500		protein_coding	rs11084094	19	1.19417	5.19925e-07	0.00860112
ENSG00000116857	TMEM9	protein_coding	rs17455455	1	0.37186	5.78066e-07	0.00951183
ENSG00000100058	CRYBB2P1	pseudogene	kgp11638601	22	0.498471	5.80037e-07	0.00951927
ENSG00000218537		protein_coding	rs875643	22	0.248595	5.82643e-07	0.00953708
ENSG00000237541	HLA-DQA2	protein_coding	rs9271589	6	2.08083	5.95437e-07	0.00972113
ENSG00000100079	LGALS2	protein_coding	kgp7659898	22	-1.98198	5.98529e-07	0.00974617
ENSG00000228696	ARL17B	protein_coding	rs17698176	17	0.473443	6.00812e-07	0.00974617
ENSG00000250714		antisense	kgp5912928	8	0.150336	6.01635e-07	0.00974617
ENSG00000260135		lincRNA	kgp5730312	16	0.838453	6.03896e-07	0.00975757
ENSG00000226824		sense_intronic	rs2016325	7	-0.770134	6.33077e-07	0.0102028
ENSG00000176998	HCG4	pseudogene	rs2860580	6	-0.438713	6.47685e-07	0.0103848
ENSG00000230658	KLHL7-AS1	lincRNA	kgp8300118	7	0.178586	6.46122e-07	0.0103848
ENSG00000214425	LRRC37A4P	pseudogene	kgp7843746	17	-0.683901	6.56073e-07	0.0104925
ENSG00000262580		antisense	kgp9658995	17	-0.611898	6.61695e-07	0.0105555
ENSG00000099974	DDTL	protein_coding	kgp703405	22	0.60308	6.74584e-07	0.0106546
ENSG00000166847	DCTN5	protein_coding	rs250583	16	0.320325	6.74711e-07	0.0106546
ENSG00000197165	SULT1A2	protein_coding	rs9929088	16	0.800276	6.72283e-07	0.0106546
ENSG00000271361	HTATSF1P2	pseudogene	rs6920099	6	-0.737824	6.71464e-07	0.0106546
ENSG00000186704	DTX2P1	pseudogene	rs2533952	7	0.491854	6.79009e-07	0.0106688
ENSG00000236682		lincRNA	kgp2061025	2	0.567015	6.78777e-07	0.0106688
ENSG00000109323	MANBA	protein_coding	kgp8472517	4	0.160511	6.94732e-07	0.0108614
ENSG00000167914	GSDMA	protein_coding	kgp763043	17	1.38123	6.93524e-07	0.0108614
ENSG00000226752	PSMD5-AS1	antisense	rs1837	9	0.788427	7.08942e-07	0.0110555
ENSG00000239257	RPL23AP1	pseudogene	kgp2145572	6	-0.615425	7.10978e-07	0.0110555
ENSG00000271361	HTATSF1P2	pseudogene	rs7761969	6	-0.745983	7.12437e-07	0.0110555
ENSG00000203666	EFCAB2	protein_coding	rs6692143	1	-0.578923	7.16422e-07	0.0110899
ENSG00000120451	SNX19	protein_coding	kgp3630417	11	0.229046	7.34865e-07	0.0113232
ENSG00000242612	DECR2	protein_coding	rs1204508	16	0.399739	7.35111e-07	0.0113232
ENSG00000067836	ROGDI	protein_coding	rs2290562	16	0.431588	7.39963e-07	0.0113675
ENSG00000182362	YBEY	protein_coding	rs11702450	21	0.374762	7.41611e-07	0.0113675
ENSG00000178252	WDR6	protein_coding	rs11720964	3	0.34908	7.43456e-07	0.011368
ENSG00000196653	ZNF502	protein_coding	kgp401950	3	0.332426	7.52377e-07	0.0114764
ENSG00000031003	FAM13B	protein_coding	kgp9902682	5	-0.448138	7.66777e-07	0.0116677
ENSG00000173801	JUP	protein_coding	rs1436441	17	1.37632	7.73787e-07	0.0117458
ENSG00000004864	SLC25A13	protein_coding	kgp2383589	7	0.305199	7.84344e-07	0.0117919
ENSG00000203666	EFCAB2	protein_coding	rs1196366	1	0.796137	7.83987e-07	0.0117919
ENSG00000226752	PSMD5-AS1	antisense	rs1359329	9	0.985178	7.8331e-07	0.0117919
ENSG00000237541	HLA-DQA2	protein_coding	rs2076523	6	1.91207	7.79746e-07	0.0117919
ENSG00000236682		lincRNA	rs1401296	2	0.581569	7.93756e-07	0.0118764
ENSG00000272221		lincRNA	kgp9072840	6	-0.55005	7.92808e-07	0.0118764
ENSG00000128283	CDC42EP1	protein_coding	kgp2577092	22	1.07789	8.02413e-07	0.0119773
ENSG00000187624	C17orf97	protein_coding	rs6565724	17	0.613765	8.05442e-07	0.011994
ENSG00000067836	ROGDI	protein_coding	rs9931084	16	0.620014	8.11995e-07	0.0120259
ENSG00000137411	VARS2	protein_coding	rs3132571	6	-0.327833	8.16736e-07	0.0120259
ENSG00000164663	USP49	protein_coding	rs10947996	6	0.294862	8.09585e-07	0.0120259
ENSG00000198502	HLA-DRB5	protein_coding	rs9270894	6	-2.50077	8.17175e-07	0.0120259
ENSG00000198502	HLA-DRB5	protein_coding	rs3130048	6	-2.98292	8.14558e-07	0.0120259
ENSG00000182362	YBEY	protein_coding	kgp10946293	21	0.398325	8.24791e-07	0.0121095
ENSG00000198502	HLA-DRB5	protein_coding	rs6940063	6	-2.85974	8.33812e-07	0.0122134
ENSG00000105983	LMBR1	protein_coding	kgp6141154	7	0.207293	8.36917e-07	0.0122303
ENSG00000119514	GALNT12	protein_coding	rs872091	9	-1.17736	8.62241e-07	0.0125711
ENSG00000198502	HLA-DRB5	protein_coding	rs3135364	6	-2.8814	8.73907e-07	0.0127116
ENSG00000182362	YBEY	protein_coding	rs2070426	21	0.410843	8.80697e-07	0.0127633
ENSG00000198502	HLA-DRB5	protein_coding	rs3117583	6	-3.04118	8.81536e-07	0.0127633
ENSG00000254859		antisense	rs7824592	8	0.518728	8.86957e-07	0.0128122
ENSG00000134202	GSTM3	protein_coding	rs1360513	1	-1.02048	8.89305e-07	0.0128166
ENSG00000214401	KANSL1-AS1	antisense	rs7224296	17	0.877288	8.93293e-07	0.0128445
ENSG00000198502	HLA-DRB5	protein_coding	rs3129963	6	-2.70712	8.9814e-07	0.0128553
ENSG00000229391	HLA-DRB6	pseudogene	kgp7975454	6	1.79835	8.96301e-07	0.0128553
ENSG00000237541	HLA-DQA2	protein_coding	rs34369284	6	-1.62403	9.01804e-07	0.0128783
ENSG00000091073	DTX2	protein_coding	kgp12165764	7	0.33837	9.37694e-07	0.0133604
ENSG00000273295		lincRNA	rs5760096	22	-0.247561	9.52321e-07	0.0135381
ENSG00000130479	MAP1S	protein_coding	kgp10497508	19	-0.322032	9.61456e-07	0.013637
ENSG00000006747	SCIN	protein_coding	kgp890583	7	1.03358	9.85782e-07	0.0139505
ENSG00000181404		pseudogene	rs10814410	9	-0.466705	1.01526e-06	0.0143352
ENSG00000254682		antisense	kgp8321704	11	-0.587846	1.03004e-06	0.0145113
ENSG00000198502	HLA-DRB5	protein_coding	rs3135369	6	-2.49502	1.03437e-06	0.0145204
ENSG00000250565	ATP6V1E2	protein_coding	rs2122715	2	-0.350196	1.03532e-06	0.0145204
ENSG00000156110	ADK	protein_coding	rs7914469	10	0.681984	1.04118e-06	0.01457
ENSG00000167720	SRR	protein_coding	rs12450028	17	-0.412811	1.05139e-06	0.0146802
ENSG00000166896	XRCC6BP1	protein_coding	rs1395511	12	-0.39786	1.05692e-06	0.0147246
ENSG00000198502	HLA-DRB5	protein_coding	rs4959098	6	2.98184	1.08105e-06	0.014994
ENSG00000230658	KLHL7-AS1	lincRNA	rs149821	7	0.157711	1.0798e-06	0.014994
ENSG00000106733	NMRK1	protein_coding	rs3752955	9	0.3391	1.08362e-06	0.0149965
ENSG00000273272		lincRNA	kgp22826572	22	1.14796	1.08905e-06	0.0150385
ENSG00000179277	MEIS3P1	pseudogene	rs2324027	17	-0.356378	1.09215e-06	0.0150482
ENSG00000259845	HERC2P10	pseudogene	rs798081	15	0.345568	1.09894e-06	0.0151084
ENSG00000104497	SNX16	protein_coding	kgp2388909	8	-0.359255	1.1025e-06	0.0151243
ENSG00000224397		lincRNA	rs3088220	20	-0.497179	1.1221e-06	0.0153595
ENSG00000170291	ELP5	protein_coding	kgp5773232	17	0.227103	1.13043e-06	0.0154398
ENSG00000198890	PRMT6	protein_coding	rs3861909	1	-0.348205	1.17926e-06	0.0160718
ENSG00000196236	XPNPEP3	protein_coding	kgp4133096	22	0.432502	1.18456e-06	0.0161089
ENSG00000179979	CRIPAK	protein_coding	kgp9486298	4	0.514307	1.18829e-06	0.0161247
ENSG00000108384	RAD51C	protein_coding	rs2007993	17	0.49211	1.21146e-06	0.0162631
ENSG00000134028	ADAMDEC1	protein_coding	rs13279576	8	-0.776733	1.20492e-06	0.0162631
ENSG00000179979	CRIPAK	protein_coding	kgp10771905	4	0.517495	1.20983e-06	0.0162631
ENSG00000198502	HLA-DRB5	protein_coding	rs9268128	6	2.92068	1.20946e-06	0.0162631
ENSG00000203666	EFCAB2	protein_coding	rs12728471	1	0.614163	1.20545e-06	0.0162631
ENSG00000166847	DCTN5	protein_coding	rs13330119	16	0.315953	1.22913e-06	0.01643
ENSG00000212978		processed_transcript	rs1177283	2	0.360577	1.22808e-06	0.01643
ENSG00000083828	ZNF586	protein_coding	rs2285615	19	-0.365478	1.23582e-06	0.0164842
ENSG00000229391	HLA-DRB6	pseudogene	rs9268832	6	-1.76974	1.24726e-06	0.0166015
ENSG00000124140	SLC12A5	protein_coding	kgp5991330	20	0.83639	1.25135e-06	0.0166206
ENSG00000218537		protein_coding	rs915590	22	-0.304558	1.25474e-06	0.0166304
ENSG00000155158	TTC39B	protein_coding	kgp5985831	9	0.946321	1.27352e-06	0.0168427
ENSG00000162994	CLHC1	protein_coding	kgp11516377	2	0.484038	1.27613e-06	0.0168427
ENSG00000141570	CBX8	protein_coding	kgp6320651	17	0.3482	1.29392e-06	0.0170416
ENSG00000138829	FBN2	protein_coding	rs6883276	5	0.927345	1.31347e-06	0.0172629
ENSG00000107679	PLEKHA1	protein_coding	kgp21960694	10	0.397107	1.32451e-06	0.0173715
ENSG00000131849	ZNF132	protein_coding	rs4801273	19	-0.23354	1.36994e-06	0.0179299
ENSG00000179979	CRIPAK	protein_coding	rs730830	4	0.498924	1.37586e-06	0.0179699
ENSG00000214401	KANSL1-AS1	antisense	kgp8042007	17	0.743324	1.38932e-06	0.0181079
ENSG00000111788		pseudogene	kgp5941606	12	-0.26098	1.43328e-06	0.0186422
ENSG00000152348	ATG10	protein_coding	rs6875409	5	0.364053	1.45579e-06	0.0188942
ENSG00000179979	CRIPAK	protein_coding	kgp7894559	4	0.515295	1.45869e-06	0.0188942
ENSG00000239445	ST3GAL6-AS1	antisense	rs844159	3	0.945709	1.493e-06	0.0192988
ENSG00000167720	SRR	protein_coding	rs1885987	17	-0.409362	1.51599e-06	0.0195557
ENSG00000206341	HLA-H	pseudogene	rs3873243	6	2.29153	1.52903e-06	0.0196693
ENSG00000236397	DDX11L2	pseudogene	kgp3701536	2	-0.595301	1.53108e-06	0.0196693
ENSG00000163682	RPL9	protein_coding	rs2260645	4	0.312358	1.59736e-06	0.0204788
ENSG00000211697	TRGV5	TR_V_gene	kgp10774157	7	0.971496	1.60239e-06	0.0205014
ENSG00000198502	HLA-DRB5	protein_coding	rs1003879	6	-2.44019	1.61281e-06	0.0205508
ENSG00000214401	KANSL1-AS1	antisense	kgp2075991	17	0.82244	1.61096e-06	0.0205508
ENSG00000263272		antisense	rs9908838	17	-0.113051	1.63208e-06	0.0207542
ENSG00000140400	MAN2C1	protein_coding	rs8028277	15	0.304732	1.67411e-06	0.0212456
ENSG00000067836	ROGDI	protein_coding	kgp1343330	16	0.520519	1.68304e-06	0.0213157
ENSG00000266903		antisense	rs1235382	19	0.324864	1.72015e-06	0.0217418
ENSG00000268895	A1BG-AS1	antisense	kgp11284397	19	-0.579031	1.73733e-06	0.0219148
ENSG00000197165	SULT1A2	protein_coding	rs153103	16	-0.68577	1.7476e-06	0.0220001
ENSG00000156110	ADK	protein_coding	kgp3771642	10	0.59071	1.77763e-06	0.0223333
ENSG00000129055	ANAPC13	protein_coding	kgp2834392	3	-0.381148	1.78398e-06	0.0223682
ENSG00000198468	FLVCR1-AS1	lincRNA	kgp9548167	1	-0.524026	1.80794e-06	0.0226234
ENSG00000187134	AKR1C1	protein_coding	rs6601882	10	1.57273	1.82063e-06	0.0227369
ENSG00000237541	HLA-DQA2	protein_coding	kgp6265747	6	-1.69755	1.82565e-06	0.0227542
ENSG00000104497	SNX16	protein_coding	kgp3825706	8	0.345135	1.83806e-06	0.0228634
ENSG00000227477	STK4-AS1	lincRNA	rs7273626	20	-0.126822	1.87824e-06	0.0233169
ENSG00000179979	CRIPAK	protein_coding	rs17164229	4	0.57984	1.89322e-06	0.0234564
ENSG00000124587	PEX6	protein_coding	kgp9848962	6	-0.48207	1.92666e-06	0.0237768
ENSG00000182117	NOP10	protein_coding	kgp1366804	15	0.431245	1.92597e-06	0.0237768
ENSG00000106733	NMRK1	protein_coding	rs6560421	9	-0.37273	1.96676e-06	0.0241765
ENSG00000262580		antisense	rs7503034	17	0.590313	1.96355e-06	0.0241765
ENSG00000182853	VMO1	protein_coding	rs8078118	17	1.38084	1.98617e-06	0.0243672
ENSG00000166263	STXBP4	protein_coding	rs8077699	17	0.324726	2.01112e-06	0.0245842
ENSG00000241945	PWP2	protein_coding	kgp3186432	21	1.05313	2.0117e-06	0.0245842
ENSG00000144115	THNSL2	protein_coding	kgp8406332	2	0.722803	2.02122e-06	0.0246114
ENSG00000171943	SRGAP2C	pseudogene	rs4844616	1	0.465042	2.02177e-06	0.0246114
ENSG00000229043		antisense	kgp11740951	7	0.31594	2.02877e-06	0.0246488
ENSG00000160223	ICOSLG	protein_coding	kgp12088035	21	0.853344	2.03333e-06	0.0246564
ENSG00000214425	LRRC37A4P	pseudogene	kgp3120738	17	-0.756595	2.03861e-06	0.0246726
ENSG00000205485		pseudogene	rs2533952	7	-0.51295	2.05939e-06	0.0248761
ENSG00000112667	DNPH1	protein_coding	kgp4033839	6	-0.611584	2.0805e-06	0.0250828
ENSG00000198502	HLA-DRB5	protein_coding	rs3129943	6	-2.70961	2.13979e-06	0.0257481
ENSG00000211697	TRGV5	TR_V_gene	kgp1168422	7	-1.14377	2.15979e-06	0.0259389
ENSG00000149743	TRPT1	protein_coding	rs677447	11	-0.415945	2.16661e-06	0.0259712
ENSG00000181031	RPH3AL	protein_coding	rs8066107	17	0.457352	2.18775e-06	0.0261255
ENSG00000272097		lincRNA	kgp8434178	6	-0.163515	2.18782e-06	0.0261255
ENSG00000255893		antisense	kgp9097698	11	0.598108	2.21752e-06	0.0264297
ENSG00000187134	AKR1C1	protein_coding	kgp6181509	10	1.80309	2.23974e-06	0.0265956
ENSG00000226334		antisense	rs2487031	9	0.526855	2.23992e-06	0.0265956
ENSG00000198502	HLA-DRB5	protein_coding	rs412657	6	2.57016	2.24423e-06	0.0265964
ENSG00000198734	F5	protein_coding	rs6127	1	0.724243	2.27829e-06	0.0269491
ENSG00000198502	HLA-DRB5	protein_coding	rs3135344	6	3.18497	2.2888e-06	0.0270225
ENSG00000176998	HCG4	pseudogene	rs7762253	6	0.433253	2.29374e-06	0.0270299
ENSG00000170291	ELP5	protein_coding	rs3826408	17	-0.227509	2.30229e-06	0.0270797
ENSG00000214425	LRRC37A4P	pseudogene	kgp8042007	17	-0.675529	2.3608e-06	0.0277159
ENSG00000230658	KLHL7-AS1	lincRNA	rs955187	7	0.15719	2.38516e-06	0.0279495
ENSG00000104689	TNFRSF10A	protein_coding	kgp5912928	8	0.463164	2.40442e-06	0.028091
ENSG00000260135		lincRNA	kgp7249183	16	0.877839	2.40619e-06	0.028091
ENSG00000155542	SETD9	protein_coding	kgp2531420	5	-0.417899	2.41916e-06	0.0281899
ENSG00000116157	GPX7	protein_coding	kgp4800711	1	0.384809	2.424e-06	0.0281939
ENSG00000198502	HLA-DRB5	protein_coding	kgp2655372	6	-2.36838	2.43824e-06	0.0282698
ENSG00000224397		lincRNA	rs6012893	20	-0.486019	2.43954e-06	0.0282698
ENSG00000236397	DDX11L2	pseudogene	rs6748854	2	-0.62356	2.47111e-06	0.0285828
ENSG00000158623	COPG2	protein_coding	kgp8377637	7	-0.496502	2.4779e-06	0.0286086
ENSG00000183935	HTR7P1	pseudogene	rs6488576	12	-0.327693	2.50365e-06	0.028747
ENSG00000196526	AFAP1	protein_coding	kgp1899259	4	0.568059	2.50029e-06	0.028747
ENSG00000263272		antisense	kgp3603893	17	-0.112832	2.50336e-06	0.028747
ENSG00000240344	PPIL3	protein_coding	kgp3709936	2	-0.485561	2.53117e-06	0.0290099
ENSG00000229056		antisense	rs17231279	2	0.583703	2.544e-06	0.0291037
ENSG00000235978		protein_coding	kgp1378643	3	0.352071	2.57315e-06	0.0293835
ENSG00000197927	C2orf27A	protein_coding	kgp4771628	2	-0.286359	2.59859e-06	0.0295664
ENSG00000226334		antisense	kgp11877502	9	0.454829	2.59562e-06	0.0295664
ENSG00000155542	SETD9	protein_coding	rs832402	5	-0.420509	2.60919e-06	0.0296332
ENSG00000224397		lincRNA	rs17196752	20	-0.545552	2.6348e-06	0.0298699
ENSG00000124587	PEX6	protein_coding	rs6941212	6	0.44296	2.6638e-06	0.0300973
ENSG00000248445		antisense	kgp3448727	5	-0.459867	2.66926e-06	0.0300973
ENSG00000260861		protein_coding	kgp1069848	20	0.896122	2.66502e-06	0.0300973
ENSG00000226752	PSMD5-AS1	antisense	rs914842	9	0.823815	2.72707e-06	0.0306939
ENSG00000134028	ADAMDEC1	protein_coding	rs1056222	8	-0.705909	2.73897e-06	0.0307726
ENSG00000128283	CDC42EP1	protein_coding	kgp7659898	22	-0.853299	2.75884e-06	0.030898
ENSG00000179979	CRIPAK	protein_coding	kgp10856467	4	0.46682	2.76692e-06	0.030898
ENSG00000181031	RPH3AL	protein_coding	kgp7000646	17	0.523936	2.76927e-06	0.030898
ENSG00000206341	HLA-H	pseudogene	rs2107199	6	2.28153	2.76984e-06	0.030898
ENSG00000104689	TNFRSF10A	protein_coding	rs6982233	8	0.555272	2.80693e-06	0.0312448
ENSG00000198502	HLA-DRB5	protein_coding	rs376549	6	-2.68311	2.8109e-06	0.0312448
ENSG00000146833	TRIM4	protein_coding	rs474229	7	-0.239878	2.84189e-06	0.0315334
ENSG00000145882	PCYOX1L	protein_coding	rs352346	5	-0.298605	2.85779e-06	0.0316538
ENSG00000140104	C14orf79	protein_coding	rs2582516	14	-0.404634	2.8661e-06	0.0316899
ENSG00000071894	CPSF1	protein_coding	rs7011824	8	0.335285	2.87375e-06	0.0317185
ENSG00000175063	UBE2C	protein_coding	kgp677891	20	-0.748884	2.92595e-06	0.0322379
ENSG00000176623	RMDN1	protein_coding	kgp9342712	8	0.291897	3.02632e-06	0.0332269
ENSG00000246898	LINC00920	lincRNA	kgp2207708	16	0.264776	3.02268e-06	0.0332269
ENSG00000239335		antisense	kgp10097470	12	-0.196419	3.03968e-06	0.0333153
ENSG00000152219	ARL14EP	protein_coding	kgp2132369	11	-0.413496	3.06946e-06	0.033583
ENSG00000166377	ATP9B	protein_coding	rs4799001	18	-0.339728	3.08794e-06	0.0336964
ENSG00000214078	CPNE1	protein_coding	rs3171389	20	-0.419383	3.09057e-06	0.0336964
ENSG00000255495	FAM85A	antisense	rs1478892	8	0.481166	3.11526e-06	0.0339066
ENSG00000263335		antisense	kgp7897041	16	0.467069	3.12306e-06	0.0339325
ENSG00000164626	KCNK5	protein_coding	kgp11057195	6	0.893146	3.13219e-06	0.0339729
ENSG00000178803	ADORA2A-AS1	antisense	rs9612907	22	0.348302	3.19375e-06	0.0345807
ENSG00000212978		processed_transcript	rs1665272	2	0.342266	3.23589e-06	0.0349766
ENSG00000006282	SPATA20	protein_coding	kgp986895	17	-0.895722	3.25649e-06	0.0350782
ENSG00000196611	MMP1	protein_coding	kgp3824865	11	1.09858	3.25623e-06	0.0350782
ENSG00000112667	DNPH1	protein_coding	kgp9294685	6	-0.545523	3.28985e-06	0.0353768
ENSG00000126698	DNAJC8	protein_coding	rs9508	1	-0.206826	3.30832e-06	0.0355145
ENSG00000196526	AFAP1	protein_coding	kgp1192722	4	0.47765	3.31549e-06	0.0355306
ENSG00000196126	HLA-DRB1	protein_coding	rs9271514	6	1.14015	3.33903e-06	0.0357219
ENSG00000133433	GSTT2B	protein_coding	kgp2483354	22	0.685082	3.38104e-06	0.0361097
ENSG00000196735	HLA-DQA1	protein_coding	kgp2939543	6	2.50555	3.38701e-06	0.0361119
ENSG00000263335		antisense	rs10521101	16	0.461709	3.41717e-06	0.0363717
ENSG00000214439	FAM185BP	pseudogene	rs10231308	7	-0.215183	3.44761e-06	0.0366334
ENSG00000138111	TMEM180	protein_coding	rs6584453	10	0.315039	3.48649e-06	0.0369215
ENSG00000198502	HLA-DRB5	protein_coding	rs9267948	6	2.70729	3.48237e-06	0.0369215
ENSG00000245958		pseudogene	rs2892848	4	-0.29916	3.49985e-06	0.0370004
ENSG00000179456	ZBTB18	protein_coding	rs2134268	1	-0.351446	3.50686e-06	0.0370121
ENSG00000172728	FUT10	protein_coding	kgp989978	8	0.465626	3.52252e-06	0.0371149
ENSG00000179979	CRIPAK	protein_coding	rs1250114	4	0.470845	3.54043e-06	0.0371787
ENSG00000242516	LINC00960	lincRNA	kgp4353536	3	0.220987	3.53899e-06	0.0371787
ENSG00000189077	TMEM120A	polymorphic_pseudogene	rs3779419	7	0.48075	3.58762e-06	0.0376112
ENSG00000131849	ZNF132	protein_coding	rs11667591	19	-0.255753	3.5944e-06	0.0376194
ENSG00000198502	HLA-DRB5	protein_coding	rs2050190	6	-2.29977	3.6159e-06	0.0377813
ENSG00000242516	LINC00960	lincRNA	rs2324363	3	-0.226093	3.63625e-06	0.0379307
ENSG00000110660	SLC35F2	protein_coding	kgp3399569	11	0.528976	3.65047e-06	0.0380158
ENSG00000160223	ICOSLG	protein_coding	kgp4359174	21	-0.850977	3.68202e-06	0.0382808
ENSG00000059122	FLYWCH1	protein_coding	kgp5125710	16	-0.280668	3.74019e-06	0.0387788
ENSG00000226752	PSMD5-AS1	antisense	rs10985015	9	1.03436	3.7423e-06	0.0387788
ENSG00000170430	MGMT	protein_coding	rs1008982	10	-0.344534	3.7939e-06	0.0392487
ENSG00000242516	LINC00960	lincRNA	rs2918515	3	0.27663	3.81227e-06	0.0393738
ENSG00000181007	ZFP82	protein_coding	rs2967516	19	-0.213324	3.83129e-06	0.0394402
ENSG00000213542		pseudogene	rs10262175	7	0.294068	3.8291e-06	0.0394402
ENSG00000106733	NMRK1	protein_coding	rs2376398	9	0.359869	3.88433e-06	0.0399207
ENSG00000226752	PSMD5-AS1	antisense	kgp11149797	9	1.01414	3.91001e-06	0.0401188
ENSG00000250565	ATP6V1E2	protein_coding	rs1868844	2	0.376615	3.92589e-06	0.0402159
ENSG00000101639	CEP192	protein_coding	rs12605081	18	0.385161	3.96114e-06	0.0405108
ENSG00000104497	SNX16	protein_coding	kgp7675467	8	-0.3519	4.01053e-06	0.0409491
ENSG00000171055	FEZ2	protein_coding	rs11691767	2	0.295276	4.02967e-06	0.041011
ENSG00000176998	HCG4	pseudogene	rs2975030	6	-0.418701	4.02446e-06	0.041011
ENSG00000141456	PELP1	protein_coding	kgp1874569	17	-0.297615	4.06895e-06	0.041243
ENSG00000259065		antisense	rs8017852	14	0.633248	4.0722e-06	0.041243
ENSG00000259845	HERC2P10	pseudogene	rs1524878	15	-0.173427	4.06672e-06	0.041243
ENSG00000268516		antisense	kgp409853	19	-0.199254	4.14127e-06	0.0418749
ENSG00000214160	ALG3	protein_coding	rs4381915	3	-0.372368	4.1571e-06	0.0419672
ENSG00000196236	XPNPEP3	protein_coding	rs138352	22	-0.432651	4.17316e-06	0.0420616
ENSG00000214174	AMZ2P1	pseudogene	rs12944877	17	0.441821	4.18971e-06	0.0421607
ENSG00000144115	THNSL2	protein_coding	kgp12440943	2	0.728288	4.24897e-06	0.0425953
ENSG00000155545	MIER3	protein_coding	kgp9557306	5	0.251391	4.24643e-06	0.0425953
ENSG00000242498	C15orf38	protein_coding	rs1256826	15	-0.532142	4.25329e-06	0.0425953
ENSG00000140400	MAN2C1	protein_coding	kgp11098252	15	0.314693	4.26157e-06	0.0426102
ENSG00000214425	LRRC37A4P	pseudogene	rs242944	17	-0.714785	4.27008e-06	0.0426273
ENSG00000174780	SRP72	protein_coding	kgp7590788	4	-0.32673	4.29651e-06	0.042755
ENSG00000196526	AFAP1	protein_coding	kgp8346998	4	-0.480579	4.29336e-06	0.042755
ENSG00000119514	GALNT12	protein_coding	kgp5423859	9	-1.21829	4.30666e-06	0.0427881
ENSG00000104497	SNX16	protein_coding	kgp3335094	8	0.337947	4.32045e-06	0.0428572
ENSG00000006282	SPATA20	protein_coding	kgp11627157	17	0.590721	4.33141e-06	0.0428981
ENSG00000090905	TNRC6A	protein_coding	rs2288742	16	-0.205227	4.34675e-06	0.042982
ENSG00000239335		antisense	kgp5148688	12	-0.202456	4.36361e-06	0.0430808
ENSG00000198502	HLA-DRB5	protein_coding	rs377763	6	-2.99487	4.40872e-06	0.0433895
ENSG00000214425	LRRC37A4P	pseudogene	rs9303471	17	-0.610012	4.40585e-06	0.0433895
ENSG00000223496	EXOSC6	protein_coding	kgp9486833	16	-0.356898	4.47114e-06	0.0439349
ENSG00000140400	MAN2C1	protein_coding	rs11072552	15	-0.282866	4.49484e-06	0.044031
ENSG00000273272		lincRNA	rs5770874	22	0.849106	4.49497e-06	0.044031
ENSG00000164111	ANXA5	protein_coding	kgp2983188	4	-0.257716	4.52213e-06	0.0442279
ENSG00000183155	RABIF	protein_coding	kgp5505975	1	0.161438	4.55596e-06	0.0444894
ENSG00000112299	VNN1	protein_coding	rs2294757	6	0.682339	4.58441e-06	0.0446383
ENSG00000176998	HCG4	pseudogene	rs9404952	6	0.384952	4.58545e-06	0.0446383
ENSG00000167085	PHB	protein_coding	kgp10084363	17	-0.527748	4.60006e-06	0.0447111
ENSG00000155542	SETD9	protein_coding	rs1423620	5	-0.408744	4.6278e-06	0.0449111
ENSG00000113971	NPHP3	protein_coding	kgp8161906	3	-0.253299	4.64714e-06	0.0449894
ENSG00000137411	VARS2	protein_coding	rs2532929	6	0.342176	4.67134e-06	0.0449894
ENSG00000146707	POMZP3	protein_coding	kgp5310707	7	-0.600653	4.67175e-06	0.0449894
ENSG00000164134	NAA15	protein_coding	kgp11930475	4	-0.298445	4.66599e-06	0.0449894
ENSG00000232063		lincRNA	rs6479549	9	-0.240895	4.67135e-06	0.0449894
ENSG00000081665	ZNF506	protein_coding	rs16996360	19	0.336085	4.72758e-06	0.0449979
ENSG00000101639	CEP192	protein_coding	rs10221384	18	0.400992	4.73005e-06	0.0449979
ENSG00000170430	MGMT	protein_coding	kgp6307669	10	-0.309279	4.69866e-06	0.0449979
ENSG00000198502	HLA-DRB5	protein_coding	rs3135334	6	3.62596	4.70557e-06	0.0449979
ENSG00000211714	TRBV7-3	TR_V_gene	rs17304	7	-0.607341	4.71198e-06	0.0449979
ENSG00000244509	APOBEC3C	protein_coding	kgp7172913	22	0.39504	4.72477e-06	0.0449979
ENSG00000259205	PRKXP1	pseudogene	rs12460	15	-0.244086	4.6932e-06	0.0449979
ENSG00000272787		lincRNA	rs1018744	22	0.468882	4.72462e-06	0.0449979
ENSG00000229043		antisense	rs1133043	7	0.303604	4.75743e-06	0.0451898
ENSG00000124588	NQO2	protein_coding	kgp1622270	6	0.600608	4.80377e-06	0.045561
ENSG00000179979	CRIPAK	protein_coding	kgp2474092	4	0.511756	4.81246e-06	0.0455744
ENSG00000116791	CRYZ	protein_coding	kgp7104593	1	0.483666	4.83768e-06	0.0457441
ENSG00000229391	HLA-DRB6	pseudogene	rs9275522	6	1.90186	4.86166e-06	0.0459016
ENSG00000138061	CYP1B1	protein_coding	rs2855658	2	0.329907	4.90395e-06	0.0462202
ENSG00000248429		antisense	rs17037201	4	-0.666961	4.91015e-06	0.0462202
ENSG00000129055	ANAPC13	protein_coding	rs13083717	3	-0.346997	4.9962e-06	0.0469304
ENSG00000250312	ZNF718	lincRNA	kgp1319819	4	0.361762	5.00057e-06	0.0469304
ENSG00000218537		protein_coding	rs5760096	22	-0.268555	5.04788e-06	0.0473037
ENSG00000125037	EMC3	protein_coding	kgp7573658	3	-0.280807	5.06949e-06	0.0474353
ENSG00000185088	RPS27L	protein_coding	rs953978	15	-0.299595	5.09329e-06	0.0474455
ENSG00000224023		lincRNA	rs1152676	10	0.36711	5.09325e-06	0.0474455
ENSG00000250565	ATP6V1E2	protein_coding	rs3814043	2	-0.295314	5.0884e-06	0.0474455
ENSG00000134909	ARHGAP32	protein_coding	kgp12300761	11	0.670833	5.23141e-06	0.0486523
ENSG00000167815	PRDX2	protein_coding	rs3745651	19	0.476993	5.23836e-06	0.0486523
ENSG00000260238	PMF1-BGLAP	protein_coding	rs3738590	1	-0.348478	5.25693e-06	0.0487525
ENSG00000083535	PIBF1	protein_coding	kgp4164344	13	0.371768	5.30012e-06	0.0490081
ENSG00000187134	AKR1C1	protein_coding	kgp10318132	10	-1.51447	5.29979e-06	0.0490081
ENSG00000164494	PDSS2	protein_coding	kgp6404895	6	-0.428709	5.3394e-06	0.0492986
ENSG00000138061	CYP1B1	protein_coding	kgp3562328	2	0.330206	5.36991e-06	0.0495074
ENSG00000155542	SETD9	protein_coding	rs832403	5	-0.457883	5.38528e-06	0.0495761
ENSG00000152056	AP1S3	protein_coding	kgp3362931	2	0.738541	5.41068e-06	0.0497369
ENSG00000248810		lincRNA	kgp254643	4	-0.944802	5.41991e-06	0.0497488
ENSG00000126870	WDR60	protein_coding	rs1188974	7	-0.450409	5.44253e-06	0.0498834

## Sheet: SSc-reported genes
Gene Symbol	Gene significantly DE in SSc macrophages?	Reported in SSc GWAS from catalog? (06/09/17)	SSc WES reported gene in study PMID: 27111861?	Subclassification in SSc (in SSc WES study with PMID: 27111861)
RHOB	No	Yes	No	-
TNIP1	No	Yes	No	-
CD247	No	Yes	No	-
STAT4	No	Yes	No	-
TNPO3	No	Yes	No	-
TNFSF4	Yes	Yes	No	-
NMNoT2	No	Yes	No	-
UHRF1BP1	No	Yes	No	-
TNFAIP3	No	Yes	No	-
BLK	No	Yes	No	-
IRF7	No	Yes	No	-
CSK	No	Yes	No	-
ITGAM	No	Yes	No	-
IRF8	No	Yes	No	-
IKZF3	Yes	Yes	No	-
SOX5	No	Yes	No	-
GRB10	Yes	Yes	No	-
RPL41	No	Yes	No	-
NOTCH4	No	Yes	No	-
HLA-DQB1	No	Yes	No	-
HLA-DRA	No	Yes	No	-
HLA-DPA1	No	Yes	No	-
HLA-DRB1	No	Yes	No	-
PSORS1C1	No	Yes	No	-
PRDM1	No	Yes	No	-
LRRC3C	No	Yes	No	-
DNoSE1L3	No	Yes	No	-
KIAA0319L	No	Yes	No	-
DNPEP	No	Yes	No	-
PXK	No	Yes	No	-
ATG5	No	Yes	No	-
JAZF1	No	Yes	No	-
SAMD9L	No	Yes	No	-
EHF	No	Yes	No	-
ESYT1	No	Yes	No	-
HLA-DPB1	No	Yes	No	-
HLA-DQA1	No	Yes	No	-
IRF5	No	Yes	No	-
ORMDL3	No	Yes	No	-
GSDMB	No	Yes	No	-
GSDMA	Yes	Yes	No	-
POLG	No	No	Yes	diffuse SSc
PPFIA2	No	No	Yes	diffuse SSc
PROK1	No	No	Yes	diffuse SSc
RASAL1	Yes	No	Yes	diffuse SSc
SCN4A	No	No	Yes	diffuse SSc
SERPINo1	No	No	Yes	diffuse SSc
SERPINB11	No	No	Yes	diffuse SSc
SLC12A8	No	No	Yes	diffuse SSc
SRCAP	No	No	Yes	diffuse SSc
TDG	No	No	Yes	diffuse SSc
TMEM209	No	No	Yes	diffuse SSc
UBE2W	No	No	Yes	diffuse SSc
WFS1	No	No	Yes	diffuse SSc
ZNF492	No	No	Yes	diffuse SSc
PKD1P1	No	No	Yes	diffuse SSc AND interstitial lung disease
ASPM	No	No	Yes	diffuse SSc AND interstitial lung disease
AVPI1	No	No	Yes	diffuse SSc AND interstitial lung disease
BANK1	No	No	Yes	diffuse SSc AND interstitial lung disease
CAV1	No	No	Yes	diffuse SSc AND interstitial lung disease
CLEC12A	No	No	Yes	diffuse SSc AND interstitial lung disease
COL4A4	No	No	Yes	diffuse SSc AND interstitial lung disease
DSP	No	No	Yes	diffuse SSc AND interstitial lung disease
EPB41L4A	No	No	Yes	diffuse SSc AND interstitial lung disease
HK3	No	No	Yes	diffuse SSc AND interstitial lung disease
MUC7	No	No	Yes	diffuse SSc AND interstitial lung disease
PMM1	No	No	Yes	diffuse SSc AND interstitial lung disease
SLC36A2	No	No	Yes	diffuse SSc AND interstitial lung disease
STAB1	No	No	Yes	diffuse SSc AND interstitial lung disease
TERT	Yes	No	Yes	diffuse SSc AND interstitial lung disease
TMPRSS3	Yes	No	Yes	diffuse SSc AND interstitial lung disease
TMPRSS9	No	No	Yes	diffuse SSc AND interstitial lung disease
TTN	No	No	Yes	diffuse SSc AND interstitial lung disease
