# Supplementary material for: Changes in macrophage transcriptome associate with systemic sclerosis and mediate GSDMA contribution to disease risk
Source: Ann Rheum Dis. 2018 Jan 17;77(4):596–601. doi: 10.1136/annrheumdis-2017-212454 (PMC5890626; doi:10.1136/annrheumdis-2017-212454)
Supplement: Supplementary file 4 [file annrheumdis-2017-212454supp004.xlsx]

## Sheet: SSc MMDs DE GSEA
Supplementary Table S3. Functional gene set enrichment analysis (GSEA) results for the databases Hallmark, KEGG and GO (BP, CC and MP) in the RNA-seq differential expression (DE) analysis between monocyte-derived macrophages (MDMs) from systemic sclerosis (SSc) patients and healthy controls (tab 1), and cis-regulated genes in the SSc cohort (tab 2). GSEA was computed ranking all genes by DESeq2 R…
Databae	Term name	NES	FDR	P or N enrich
HALLMARK	HALLMARK_INTERFERON_GAMMA_RESPONSE	-9.78429	<1E-06	N
GO	GO_RIBONUCLEOPROTEIN_COMPLEX_BIOGENESIS	8.89028	<1E-06	P
GO	GO_IMMUNE_RESPONSE	-8.27216	<1E-06	N
GO	GO_RIBOSOME_BIOGENESIS	8.19724	<1E-06	P
GO	GO_RNA_PROCESSING	8.07203	<1E-06	P
GO	GO_RRNA_METABOLIC_PROCESS	7.74264	<1E-06	P
GO	GO_TRANSLATIONAL_INITIATION	7.65114	<1E-06	P
GO	GO_NCRNA_METABOLIC_PROCESS	7.53948	<1E-06	P
GO	GO_IMMUNE_SYSTEM_PROCESS	-7.5388	<1E-06	N
HALLMARK	HALLMARK_INTERFERON_ALPHA_RESPONSE	-7.36145	<1E-06	N
GO	GO_NCRNA_PROCESSING	7.33356	<1E-06	P
GO	GO_POLY_A_RNA_BINDING	7.19752	<1E-06	P
GO	GO_RNA_BINDING	7.18529	<1E-06	P
GO	GO_RIBONUCLEOPROTEIN_COMPLEX	6.91668	<1E-06	P
GO	GO_RIBOSOMAL_SUBUNIT	6.81212	<1E-06	P
KEGG	KEGG_RIBOSOME	6.8115	<1E-06	P
GO	GO_PROTEIN_LOCALIZATION_TO_ENDOPLASMIC_RETICULUM	6.79866	<1E-06	P
GO	GO_CYTOSOLIC_RIBOSOME	6.76957	<1E-06	P
GO	GO_ESTABLISHMENT_OF_PROTEIN_LOCALIZATION_TO_ENDOPLASMIC_RETICULUM	6.65431	<1E-06	P
GO	GO_MULTI_ORGANISM_METABOLIC_PROCESS	6.61107	<1E-06	P
GO	GO_ESTABLISHMENT_OF_LOCALIZATION_IN_CELL	6.52756	<1E-06	P
GO	GO_RIBOSOME	6.47905	<1E-06	P
GO	GO_CYTOSOLIC_LARGE_RIBOSOMAL_SUBUNIT	6.42926	<1E-06	P
GO	GO_REGULATION_OF_IMMUNE_RESPONSE	-6.41126	<1E-06	N
GO	GO_REGULATION_OF_IMMUNE_SYSTEM_PROCESS	-6.27731	<1E-06	N
GO	GO_NUCLEAR_TRANSCRIBED_MRNA_CATABOLIC_PROCESS_NONSENSE_MEDIATED_DECAY	6.24156	<1E-06	P
GO	GO_STRUCTURAL_CONSTITUENT_OF_RIBOSOME	6.21776	<1E-06	P
GO	GO_ESTABLISHMENT_OF_PROTEIN_LOCALIZATION	6.1579	<1E-06	P
GO	GO_MRNA_METABOLIC_PROCESS	6.0943	<1E-06	P
GO	GO_DEFENSE_RESPONSE	-6.04411	<1E-06	N
GO	GO_AMIDE_BIOSYNTHETIC_PROCESS	6.04291	<1E-06	P
GO	GO_INNATE_IMMUNE_RESPONSE	-6.01754	<1E-06	N
GO	GO_ORGANONITROGEN_COMPOUND_BIOSYNTHETIC_PROCESS	5.97069	<1E-06	P
GO	GO_VIRAL_LIFE_CYCLE	5.96815	<1E-06	P
GO	GO_PROTEIN_LOCALIZATION	5.92333	<1E-06	P
GO	GO_PEPTIDE_METABOLIC_PROCESS	5.91777	<1E-06	P
GO	GO_CELLULAR_MACROMOLECULE_LOCALIZATION	5.84454	<1E-06	P
GO	GO_CELLULAR_AMIDE_METABOLIC_PROCESS	5.77581	<1E-06	P
GO	GO_INTRACELLULAR_PROTEIN_TRANSPORT	5.76487	<1E-06	P
GO	GO_LARGE_RIBOSOMAL_SUBUNIT	5.70771	<1E-06	P
GO	GO_NUCLEOLUS	5.6869	<1E-06	P
GO	GO_RNA_CATABOLIC_PROCESS	5.62013	<1E-06	P
GO	GO_ADAPTIVE_IMMUNE_RESPONSE	-5.56507	<1E-06	N
GO	GO_POSITIVE_REGULATION_OF_IMMUNE_SYSTEM_PROCESS	-5.54144	<1E-06	N
GO	GO_PROTEIN_TARGETING_TO_MEMBRANE	5.48576	<1E-06	P
GO	GO_ORGANONITROGEN_COMPOUND_METABOLIC_PROCESS	5.38743	<1E-06	P
GO	GO_RESPONSE_TO_INTERFERON_GAMMA	-5.25162	<1E-06	N
GO	GO_SYMBIOSIS_ENCOMPASSING_MUTUALISM_THROUGH_PARASITISM	5.22551	<1E-06	P
GO	GO_ADENYL_NUCLEOTIDE_BINDING	-5.22286	<1E-06	N
GO	GO_INTERSPECIES_INTERACTION_BETWEEN_ORGANISMS	5.22123	<1E-06	P
GO	GO_MEMBRANE_ORGANIZATION	5.18847	<1E-06	P
GO	GO_ESTABLISHMENT_OF_PROTEIN_LOCALIZATION_TO_MEMBRANE	5.18483	<1E-06	P
GO	GO_MACROMOLECULE_CATABOLIC_PROCESS	5.17687	<1E-06	P
GO	GO_PROTEIN_LOCALIZATION_TO_MEMBRANE	5.15378	<1E-06	P
KEGG	KEGG_GRAFT_VERSUS_HOST_DISEASE	-5.14963	<1E-06	N
GO	GO_POSITIVE_REGULATION_OF_IMMUNE_RESPONSE	-5.14695	<1E-06	N
GO	GO_CATABOLIC_PROCESS	5.12483	<1E-06	P
GO	GO_INTERFERON_GAMMA_MEDIATED_SIGNALING_PATHWAY	-5.12308	<1E-06	N
GO	GO_CELLULAR_RESPONSE_TO_INTERFERON_GAMMA	-5.08526	<1E-06	N
GO	GO_CYTOKINE_MEDIATED_SIGNALING_PATHWAY	-5.06627	<1E-06	N
GO	GO_PROTEIN_TARGETING	4.98406	<1E-06	P
GO	GO_IMMUNE_EFFECTOR_PROCESS	-4.98346	<1E-06	N
GO	GO_ESTABLISHMENT_OF_PROTEIN_LOCALIZATION_TO_ORGANELLE	4.96533	<1E-06	P
GO	GO_REGULATION_OF_CYTOKINE_PRODUCTION	-4.96014	<1E-06	N
GO	GO_SINGLE_ORGANISM_CELLULAR_LOCALIZATION	4.93818	<1E-06	P
GO	GO_LYMPHOCYTE_ACTIVATION	-4.88742	<1E-06	N
GO	GO_PROTEIN_LOCALIZATION_TO_ORGANELLE	4.88728	<1E-06	P
GO	GO_RIBONUCLEOTIDE_BINDING	-4.86808	<1E-06	N
GO	GO_CELLULAR_CATABOLIC_PROCESS	4.86008	<1E-06	P
GO	GO_REGULATION_OF_HOMOTYPIC_CELL_CELL_ADHESION	-4.83768	<1E-06	N
GO	GO_CYTOPLASMIC_TRANSLATION	4.80154	<1E-06	P
GO	GO_LEUKOCYTE_ACTIVATION	-4.78289	<1E-06	N
GO	GO_REGULATION_OF_CELL_ACTIVATION	-4.77072	<1E-06	N
GO	GO_RIBONUCLEOPROTEIN_COMPLEX_SUBUNIT_ORGANIZATION	4.75733	<1E-06	P
HALLMARK	HALLMARK_ALLOGRAFT_REJECTION	-4.74127	<1E-06	N
GO	GO_ORGANIC_CYCLIC_COMPOUND_CATABOLIC_PROCESS	4.7351	<1E-06	P
GO	GO_CELLULAR_RESPONSE_TO_CYTOKINE_STIMULUS	-4.67762	<1E-06	N
GO	GO_RIBOSOMAL_LARGE_SUBUNIT_BIOGENESIS	4.63409	<1E-06	P
GO	GO_RESPONSE_TO_TYPE_I_INTERFERON	-4.63326	<1E-06	N
GO	GO_NUCLEOPLASM_PART	4.6227	<1E-06	P
GO	GO_CYTOSOLIC_PART	4.61404	<1E-06	P
GO	GO_POSITIVE_REGULATION_OF_CELL_CELL_ADHESION	-4.59968	<1E-06	N
GO	GO_RESPONSE_TO_CYTOKINE	-4.59386	<1E-06	N
GO	GO_REGULATION_OF_CELL_CELL_ADHESION	-4.56546	<1E-06	N
GO	GO_PRERIBOSOME	4.48717	<1E-06	P
GO	GO_POSITIVE_REGULATION_OF_RESPONSE_TO_STIMULUS	-4.48355	<1E-06	N
KEGG	KEGG_ALLOGRAFT_REJECTION	-4.40527	<1E-06	N
GO	GO_RIBOSOMAL_SMALL_SUBUNIT_BIOGENESIS	4.3696	<1E-06	P
GO	GO_ENDOPLASMIC_RETICULUM	4.36065	<1E-06	P
GO	GO_TRANSFERASE_COMPLEX	4.30252	<1E-06	P
GO	GO_NUCLEAR_OUTER_MEMBRANE_ENDOPLASMIC_RETICULUM_MEMBRANE_NETWORK	4.24142	<1E-06	P
GO	GO_POSITIVE_REGULATION_OF_CYTOKINE_PRODUCTION	-4.23937	<1E-06	N
GO	GO_DNA_REPLICATION	-4.21236	<1E-06	N
GO	GO_POSITIVE_REGULATION_OF_CELL_ACTIVATION	-4.2079	<1E-06	N
GO	GO_CATALYTIC_COMPLEX	4.18522	<1E-06	P
GO	GO_REGULATION_OF_LYMPHOCYTE_MEDIATED_IMMUNITY	-4.18206	<1E-06	N
GO	GO_REGULATION_OF_INTERFERON_GAMMA_PRODUCTION	-4.16979	<1E-06	N
GO	GO_REGULATION_OF_IMMUNE_EFFECTOR_PROCESS	-4.15452	<1E-06	N
KEGG	KEGG_ANTIGEN_PROCESSING_AND_PRESENTATION	-4.12336	<1E-06	N
GO	GO_REGULATION_OF_LEUKOCYTE_PROLIFERATION	-4.09416	<1E-06	N
HALLMARK	HALLMARK_G2M_CHECKPOINT	-4.08505	<1E-06	N
GO	GO_REGULATION_OF_CELL_ADHESION	-4.07588	<1E-06	N
GO	GO_ACTIVATION_OF_IMMUNE_RESPONSE	-4.05286	<1E-06	N
GO	GO_DEFENSE_RESPONSE_TO_VIRUS	-4.05053	<1E-06	N
GO	GO_REGULATION_OF_CELLULAR_RESPONSE_TO_STRESS	4.04812	<1E-06	P
GO	GO_REGULATION_OF_LEUKOCYTE_MEDIATED_IMMUNITY	-4.02634	<1E-06	N
GO	GO_REGULATION_OF_DEFENSE_RESPONSE	-4.02474	<1E-06	N
GO	GO_CYTOSOLIC_SMALL_RIBOSOMAL_SUBUNIT	4.00967	<1E-06	P
GO	GO_CELL_SUBSTRATE_JUNCTION	3.9974	<1E-06	P
GO	GO_RRNA_BINDING	3.99336	<1E-06	P
GO	GO_CELL_ACTIVATION	-3.98749	<1E-06	N
KEGG	KEGG_TYPE_I_DIABETES_MELLITUS	-3.9823	<1E-06	N
GO	GO_ENDOPLASMIC_RETICULUM_PART	3.96651	<1E-06	P
GO	GO_MHC_PROTEIN_COMPLEX	-3.96087	<1E-06	N
GO	GO_LEUKOCYTE_CELL_CELL_ADHESION	-3.92401	<1E-06	N
GO	GO_NUCLEOLAR_PART	3.92218	<1E-06	P
GO	GO_VESICLE_MEDIATED_TRANSPORT	3.90403	<1E-06	P
GO	GO_REGULATION_OF_CELLULAR_AMIDE_METABOLIC_PROCESS	3.89132	<1E-06	P
GO	GO_SMALL_RIBOSOMAL_SUBUNIT	3.87218	<1E-06	P
GO	GO_IMMUNE_SYSTEM_DEVELOPMENT	-3.86328	<1E-06	N
GO	GO_INTRACELLULAR_VESICLE	3.85563	<1E-06	P
GO	GO_T_CELL_RECEPTOR_SIGNALING_PATHWAY	-3.85333	<1E-06	N
GO	GO_REGULATION_OF_ADAPTIVE_IMMUNE_RESPONSE	-3.85081	<1E-06	N
GO	GO_RESPONSE_TO_VIRUS	-3.84539	<1E-06	N
GO	GO_LYMPHOCYTE_COSTIMULATION	-3.8451	<1E-06	N
GO	GO_IMMUNE_RESPONSE_REGULATING_CELL_SURFACE_RECEPTOR_SIGNALING_PATHWAY	-3.84071	<1E-06	N
GO	GO_POSITIVE_REGULATION_OF_T_CELL_PROLIFERATION	-3.82699	<1E-06	N
GO	GO_NEGATIVE_REGULATION_OF_IMMUNE_SYSTEM_PROCESS	-3.82683	<1E-06	N
GO	GO_REGULATION_OF_T_CELL_PROLIFERATION	-3.82351	<1E-06	N
KEGG	KEGG_PRIMARY_IMMUNODEFICIENCY	-3.8228	<1E-06	N
GO	GO_LYMPHOCYTE_DIFFERENTIATION	-3.81674	<1E-06	N
GO	GO_VACUOLAR_TRANSPORT	3.7988	<1E-06	P
GO	GO_POSITIVE_REGULATION_OF_DEFENSE_RESPONSE	-3.78206	<1E-06	N
GO	GO_ANTIGEN_RECEPTOR_MEDIATED_SIGNALING_PATHWAY	-3.75068	<1E-06	N
KEGG	KEGG_AUTOIMMUNE_THYROID_DISEASE	-3.74898	<1E-06	N
GO	GO_STRUCTURAL_MOLECULE_ACTIVITY	3.74613	<1E-06	P
GO	GO_ANCHORING_JUNCTION	3.73654	<1E-06	P
HALLMARK	HALLMARK_E2F_TARGETS	-3.73598	<1E-06	N
GO	GO_RNA_SPLICING	3.72321	<1E-06	P
GO	GO_T_CELL_DIFFERENTIATION	-3.72265	<1E-06	N
GO	GO_POSITIVE_REGULATION_OF_LYMPHOCYTE_MEDIATED_IMMUNITY	-3.71857	<1E-06	N
GO	GO_SINGLE_ORGANISM_BIOSYNTHETIC_PROCESS	3.71035	<1E-06	P
GO	GO_MATURATION_OF_SSU_RRNA	3.69096	<1E-06	P
GO	GO_POSITIVE_REGULATION_OF_LEUKOCYTE_PROLIFERATION	-3.68183	<1E-06	N
KEGG	KEGG_CYTOKINE_CYTOKINE_RECEPTOR_INTERACTION	-3.66145	<1E-06	N
GO	GO_GOLGI_APPARATUS	3.65602	<1E-06	P
GO	GO_REGULATION_OF_T_CELL_MEDIATED_IMMUNITY	-3.65592	<1E-06	N
GO	GO_POSITIVE_REGULATION_OF_CELL_ADHESION	-3.65487	<1E-06	N
GO	GO_LEUKOCYTE_DIFFERENTIATION	-3.65087	<1E-06	N
GO	GO_INFLAMMATORY_RESPONSE	-3.63775	<1E-06	N
KEGG	KEGG_INTESTINAL_IMMUNE_NETWORK_FOR_IGA_PRODUCTION	-3.63364	<1E-06	N
GO	GO_MHC_CLASS_II_PROTEIN_COMPLEX	-3.63319	<1E-06	N
GO	GO_ADAPTIVE_IMMUNE_RESPONSE_BASED_ON_SOMATIC_RECOMBINATION_OF_IMMUNE_RECEPTORS_BUILT_FROM_IMMUNOGLOBULIN_SUPERFAMILY_DOMAINS	-3.63025	<1E-06	N
GO	GO_VACUOLE	3.62872	<1E-06	P
GO	GO_MRNA_PROCESSING	3.5931	<1E-06	P
GO	GO_REGULATION_OF_INNATE_IMMUNE_RESPONSE	-3.58328	<1E-06	N
GO	GO_POSITIVE_REGULATION_OF_INTERFERON_GAMMA_PRODUCTION	-3.57101	<1E-06	N
GO	GO_MITOTIC_CELL_CYCLE	-3.55091	<1E-06	N
GO	GO_CYTOKINE_PRODUCTION	-3.53634	<1E-06	N
GO	GO_SIDE_OF_MEMBRANE	-3.51456	<1E-06	N
GO	GO_NEGATIVE_REGULATION_OF_VIRAL_GENOME_REPLICATION	-3.50408	1.43488e-06	N
GO	GO_SOMATIC_DIVERSIFICATION_OF_IMMUNE_RECEPTORS	-3.50402	1.4128e-06	N
GO	GO_POSITIVE_REGULATION_OF_IMMUNE_EFFECTOR_PROCESS	-3.49379	1.3914e-06	N
GO	GO_POSITIVE_REGULATION_OF_HYDROLASE_ACTIVITY	-3.49363	1.37063e-06	N
GO	GO_NEGATIVE_REGULATION_OF_VIRAL_PROCESS	-3.49029	1.35047e-06	N
GO	GO_CYTOSKELETON	-3.48846	<1E-06	N
GO	GO_RESPONSE_TO_BIOTIC_STIMULUS	-3.48424	1.3309e-06	N
GO	GO_POSITIVE_REGULATION_OF_LEUKOCYTE_MEDIATED_IMMUNITY	-3.48172	1.31189e-06	N
GO	GO_TRANSLATION_INITIATION_FACTOR_ACTIVITY	3.47554	<1E-06	P
GO	GO_RNA_SPLICING_VIA_TRANSESTERIFICATION_REACTIONS	3.46954	2.18386e-06	P
GO	GO_RIBOSOME_ASSEMBLY	3.46189	2.14186e-06	P
GO	GO_ENDOMEMBRANE_SYSTEM_ORGANIZATION	3.45206	2.10145e-06	P
GO	GO_LYMPHOCYTE_MEDIATED_IMMUNITY	-3.44593	1.29341e-06	N
GO	GO_MATURATION_OF_SSU_RRNA_FROM_TRICISTRONIC_RRNA_TRANSCRIPT_SSU_RRNA_5_8S_RRNA_LSU_RRNA_	3.4401	2.06254e-06	P
GO	GO_MACROMOLECULAR_COMPLEX_ASSEMBLY	3.43113	3.98804e-06	P
GO	GO_SMALL_SUBUNIT_PROCESSOME	3.42946	<1E-06	P
GO	GO_NUCLEAR_TRANSPORT	3.41824	3.91682e-06	P
GO	GO_DNA_DEPENDENT_DNA_REPLICATION	-3.39827	2.57792e-06	N
GO	GO_NCRNA_TRANSCRIPTION	3.39725	3.8481e-06	P
GO	GO_REGULATION_OF_CATABOLIC_PROCESS	3.39461	3.78176e-06	P
GO	GO_NEGATIVE_REGULATION_OF_CYTOKINE_PRODUCTION	-3.39246	2.54261e-06	N
KEGG	KEGG_CELL_ADHESION_MOLECULES_CAMS	-3.37937	<1E-06	N
GO	GO_REGULATION_OF_LYMPHOCYTE_DIFFERENTIATION	-3.36923	2.50825e-06	N
GO	GO_REGULATION_OF_RESPONSE_TO_NUTRIENT_LEVELS	3.35644	3.71766e-06	P
GO	GO_CENTROSOME	-3.35407	<1E-06	N
GO	GO_REGULATION_OF_RESPONSE_TO_EXTRACELLULAR_STIMULUS	3.34252	3.6557e-06	P
GO	GO_CYTOSKELETAL_PART	-3.33854	<1E-06	N
GO	GO_TRANSLATION_FACTOR_ACTIVITY_RNA_BINDING	3.33611	<1E-06	P
HALLMARK	HALLMARK_COMPLEMENT	-3.33254	<1E-06	N
GO	GO_REGULATION_OF_T_CELL_DIFFERENTIATION	-3.31852	2.47481e-06	N
GO	GO_REGULATION_OF_LEUKOCYTE_MEDIATED_CYTOTOXICITY	-3.31585	2.44224e-06	N
GO	GO_POSITIVE_REGULATION_OF_CELL_KILLING	-3.30564	2.41053e-06	N
HALLMARK	HALLMARK_UNFOLDED_PROTEIN_RESPONSE	3.30163	<1E-06	P
GO	GO_MICROTUBULE_CYTOSKELETON	-3.29651	1.18263e-05	N
GO	GO_CELL_JUNCTION	3.29621	9.39471e-06	P
GO	GO_LEUKOCYTE_MEDIATED_IMMUNITY	-3.2888	2.37962e-06	N
GO	GO_REGULATION_OF_HYDROLASE_ACTIVITY	-3.28527	2.3495e-06	N
GO	GO_SNRNA_METABOLIC_PROCESS	3.2825	1.06781e-05	P
GO	GO_UBIQUITIN_LIKE_PROTEIN_TRANSFERASE_ACTIVITY	3.27795	<1E-06	P
GO	GO_VACUOLAR_PART	3.27524	9.03338e-06	P
GO	GO_REGULATION_OF_CELL_KILLING	-3.27326	3.46753e-06	N
GO	GO_MITOCHONDRION	3.26111	8.69881e-06	P
GO	GO_RESPONSE_TO_OXYGEN_CONTAINING_COMPOUND	3.26012	1.05059e-05	P
GO	GO_PRERIBOSOME_LARGE_SUBUNIT_PRECURSOR	3.25131	8.38814e-06	P
GO	GO_CONDENSED_CHROMOSOME	-3.24783	1.0348e-05	N
GO	GO_DNA_METABOLIC_PROCESS	-3.24549	5.64104e-06	N
GO	GO_REGULATION_OF_LEUKOCYTE_DIFFERENTIATION	-3.23388	6.66796e-06	N
GO	GO_CELL_DEATH	3.2207	1.38168e-05	P
GO	GO_ENVELOPE	3.22067	8.09889e-06	P
GO	GO_RESPONSE_TO_EXTERNAL_STIMULUS	-3.2167	6.58763e-06	N
GO	GO_POSITIVE_REGULATION_OF_CELL_COMMUNICATION	-3.20538	7.58628e-06	N
GO	GO_PROTEIN_MODIFICATION_BY_SMALL_PROTEIN_CONJUGATION_OR_REMOVAL	3.20196	1.3601e-05	P
GO	GO_REGULATION_OF_CELL_DEATH	3.20177	1.33917e-05	P
GO	GO_LYTIC_VACUOLE	3.19601	7.82893e-06	P
GO	GO_CELL_CYCLE	-3.19116	9.67461e-06	N
GO	GO_RECEPTOR_ACTIVITY	-3.18491	3.05797e-05	N
GO	GO_POSITIVE_REGULATION_OF_CELL_CYCLE_PROCESS	-3.179	9.56211e-06	N
KEGG	KEGG_LYSOSOME	3.17687	<1E-06	P
GO	GO_ANTIGEN_PROCESSING_AND_PRESENTATION	-3.17185	9.45221e-06	N
GO	GO_ERAD_PATHWAY	3.17174	1.64916e-05	P
GO	GO_ANTIGEN_PROCESSING_AND_PRESENTATION_OF_PEPTIDE_ANTIGEN	-3.17119	9.34479e-06	N
GO	GO_REGULATION_OF_TRANSLATIONAL_INITIATION	3.17106	1.78812e-05	P
GO	GO_ER_TO_GOLGI_VESICLE_MEDIATED_TRANSPORT	3.16384	1.76182e-05	P
GO	GO_CELL_CYCLE_PROCESS	-3.16185	9.2398e-06	N
GO	GO_DNA_RECOMBINATION	-3.15016	1.01481e-05	N
GO	GO_CHROMOSOME	-3.12804	3.5339e-05	N
GO	GO_FORMATION_OF_TRANSLATION_PREINITIATION_COMPLEX	3.12557	2.67086e-05	P
GO	GO_SIGNAL_TRANSDUCER_ACTIVITY	-3.12522	2.29348e-05	N
GO	GO_GOLGI_APPARATUS_PART	3.12503	1.15215e-05	P
GO	GO_POSITIVE_REGULATION_OF_ADAPTIVE_IMMUNE_RESPONSE	-3.11724	1.30495e-05	N
GO	GO_MICROTUBULE_ORGANIZING_CENTER	-3.11596	3.18051e-05	N
HALLMARK	HALLMARK_EPITHELIAL_MESENCHYMAL_TRANSITION	3.10854	<1E-06	P
GO	GO_SNORNA_BINDING	3.10658	1.18995e-05	P
GO	GO_DEFENSE_RESPONSE_TO_OTHER_ORGANISM	-3.0979	1.59477e-05	N
GO	GO_ENZYME_BINDING	3.09767	1.07095e-05	P
GO	GO_MITOTIC_RECOMBINATION	-3.09476	1.67924e-05	N
GO	GO_TRANSFERASE_COMPLEX_TRANSFERRING_PHOSPHORUS_CONTAINING_GROUPS	3.08524	1.11615e-05	P
GO	GO_PIGMENT_GRANULE	3.07603	1.46356e-05	P
GO	GO_POSITIVE_REGULATION_OF_MULTICELLULAR_ORGANISMAL_PROCESS	-3.07573	2.1518e-05	N
GO	GO_POSTTRANSCRIPTIONAL_REGULATION_OF_GENE_EXPRESSION	3.07031	4.49274e-05	P
GO	GO_REGULATION_OF_VIRAL_GENOME_REPLICATION	-3.05965	2.90259e-05	N
GO	GO_INTRACELLULAR_SIGNAL_TRANSDUCTION	-3.05783	3.06115e-05	N
HALLMARK	HALLMARK_DNA_REPAIR	3.05724	<1E-06	P
KEGG	KEGG_NATURAL_KILLER_CELL_MEDIATED_CYTOTOXICITY	-3.05661	2.19048e-05	N
KEGG	KEGG_VIRAL_MYOCARDITIS	-3.05461	1.99134e-05	N
GO	GO_ESCRT_COMPLEX	3.04647	2.15991e-05	P
GO	GO_MITOTIC_DNA_INTEGRITY_CHECKPOINT	-3.04581	3.21815e-05	N
GO	GO_NEGATIVE_REGULATION_OF_CELL_DEATH	3.04406	5.96464e-05	P
GO	GO_RESPONSE_TO_ENDOPLASMIC_RETICULUM_STRESS	3.04286	5.8818e-05	P
GO	GO_DNA_INTEGRITY_CHECKPOINT	-3.03773	3.46824e-05	N
GO	GO_CHROMOSOMAL_REGION	-3.03258	3.61736e-05	N
GO	GO_NEGATIVE_REGULATION_OF_CELL_ACTIVATION	-3.01561	4.08686e-05	N
GO	GO_ACTIVATION_OF_PROTEIN_KINASE_ACTIVITY	3.00847	7.12538e-05	P
GO	GO_NEGATIVE_REGULATION_OF_T_CELL_MEDIATED_IMMUNITY	-3.00628	4.41221e-05	N
GO	GO_REGULATION_OF_NATURAL_KILLER_CELL_MEDIATED_IMMUNITY	-3.00429	4.45913e-05	N
GO	GO_TRANSCRIPTION_INITIATION_FROM_RNA_POLYMERASE_II_PROMOTER	2.99792	7.47158e-05	P
GO	GO_TRANSCRIPTION_ELONGATION_FROM_RNA_POLYMERASE_II_PROMOTER	2.99755	7.37196e-05	P
GO	GO_CELL_CYCLE_CHECKPOINT	-2.99323	4.94595e-05	N
GO	GO_AUTOPHAGY	2.99115	8.27472e-05	P
GO	GO_REGULATION_OF_KINASE_ACTIVITY	2.99005	8.16725e-05	P
GO	GO_OLFACTORY_RECEPTOR_ACTIVITY	-2.98864	0.000149373	N
GO	GO_RIBOSOMAL_LARGE_SUBUNIT_ASSEMBLY	2.98665	8.62681e-05	P
KEGG	KEGG_ASTHMA	-2.98089	4.20545e-05	N
GO	GO_CELLULAR_RESPONSE_TO_OXYGEN_CONTAINING_COMPOUND	2.97579	9.89817e-05	P
GO	GO_REGULATION_OF_T_CELL_MEDIATED_CYTOTOXICITY	-2.97423	6.1463e-05	N
GO	GO_STRAND_DISPLACEMENT	-2.97173	6.26093e-05	N
GO	GO_TRANSFERASE_ACTIVITY_TRANSFERRING_PHOSPHORUS_CONTAINING_GROUPS	-2.96927	0.000155368	N
GO	GO_MHC_PROTEIN_COMPLEX_BINDING	-2.96676	0.000146689	N
GO	GO_SOMATIC_DIVERSIFICATION_OF_IMMUNE_RECEPTORS_VIA_SOMATIC_MUTATION	-2.96111	7.33612e-05	N
GO	GO_EXTERNAL_SIDE_OF_PLASMA_MEMBRANE	-2.95599	4.63757e-05	N
GO	GO_SOMATIC_DIVERSIFICATION_OF_IMMUNE_RECEPTORS_VIA_GERMLINE_RECOMBINATION_WITHIN_A_SINGLE_LOCUS	-2.95561	7.61564e-05	N
GO	GO_REGULATION_OF_GTPASE_ACTIVITY	-2.95436	7.54447e-05	N
GO	GO_SOMATIC_CELL_DNA_RECOMBINATION	-2.94917	7.98123e-05	N
GO	GO_DNA_TEMPLATED_TRANSCRIPTION_ELONGATION	2.94746	0.000128889	P
GO	GO_REGULATION_OF_RESPONSE_TO_STRESS	-2.94509	8.24318e-05	N
HALLMARK	HALLMARK_INFLAMMATORY_RESPONSE	-2.94242	<1E-06	N
GO	GO_MITOTIC_CELL_CYCLE_CHECKPOINT	-2.94104	8.25099e-05	N
GO	GO_SIGNALING_RECEPTOR_ACTIVITY	-2.93648	0.000187603	N
GO	GO_POSITIVE_REGULATION_OF_INNATE_IMMUNE_RESPONSE	-2.93328	8.58574e-05	N
GO	GO_REGULATION_OF_TRANSFERASE_ACTIVITY	2.92958	0.000156771	P
GO	GO_REGULATION_OF_PROTEIN_MODIFICATION_PROCESS	2.92602	0.000160154	P
GO	GO_CHROMOSOME_ORGANIZATION	-2.92516	9.24686e-05	N
GO	GO_DNA_DIRECTED_RNA_POLYMERASE_II_HOLOENZYME	2.92501	5.9186e-05	P
GO	GO_NEGATIVE_REGULATION_OF_MITOTIC_CELL_CYCLE	-2.92357	9.24479e-05	N
GO	GO_KINASE_ACTIVITY	-2.91922	0.00024019	N
GO	GO_PROTEASOMAL_PROTEIN_CATABOLIC_PROCESS	2.917	0.000173876	P
GO	GO_NATURAL_KILLER_CELL_ACTIVATION	-2.91597	9.48379e-05	N
GO	GO_POSITIVE_REGULATION_OF_KINASE_ACTIVITY	2.9149	0.000178207	P
GO	GO_REGULATION_OF_CELL_CYCLE_PROCESS	-2.91202	9.56104e-05	N
GO	GO_LYMPHOCYTE_MIGRATION	-2.90478	0.000102695	N
GO	GO_REPLICATION_FORK	-2.90423	0.000103711	N
GO	GO_NEGATIVE_REGULATION_OF_MOLECULAR_FUNCTION	2.90332	0.000197872	P
GO	GO_NUCLEAR_BODY	2.90249	7.80438e-05	P
GO	GO_VIRION_ASSEMBLY	2.90205	0.000198056	P
GO	GO_POSITIVE_REGULATION_OF_CATALYTIC_ACTIVITY	-2.90069	0.000104924	N
GO	GO_CELLULAR_RESPONSE_TO_ORGANIC_SUBSTANCE	2.90069	0.000197036	P
GO	GO_POSITIVE_REGULATION_OF_INTERLEUKIN_12_PRODUCTION	-2.90014	0.000104034	N
GO	GO_MATURATION_OF_LSU_RRNA	2.89525	0.000199747	P
GO	GO_RNA_MODIFICATION	2.89215	0.000199931	P
GO	GO_CELLULAR_RESPONSE_TO_VIRUS	-2.89082	0.000107774	N
GO	GO_MHC_PROTEIN_BINDING	-2.89053	0.000253199	N
GO	GO_POSITIVE_REGULATION_OF_TRANSFERASE_ACTIVITY	2.88437	0.000219335	P
GO	GO_GOLGI_VESICLE_TRANSPORT	2.88008	0.000225271	P
GO	GO_POSITIVE_REGULATION_OF_INFLAMMATORY_RESPONSE	-2.8787	0.000118304	N
GO	GO_90S_PRERIBOSOME	2.87869	9.27954e-05	P
GO	GO_POSITIVE_REGULATION_OF_NATURAL_KILLER_CELL_MEDIATED_IMMUNITY	-2.87829	0.000117326	N
GO	GO_REGULATION_OF_AUTOPHAGY	2.87761	0.000227561	P
GO	GO_ALPHA_BETA_T_CELL_ACTIVATION	-2.87504	0.000121605	N
GO	GO_REGULATION_OF_CELL_PROLIFERATION	-2.87191	0.000122859	N
GO	GO_RESPONSE_TO_TUMOR_NECROSIS_FACTOR	-2.86819	0.000124795	N
GO	GO_REGULATION_OF_CD4_POSITIVE_ALPHA_BETA_T_CELL_ACTIVATION	-2.86104	0.000132678	N
GO	GO_MISMATCH_REPAIR_COMPLEX	-2.86043	0.00014731	N
GO	GO_CYTOPLASMIC_TRANSLATIONAL_INITIATION	2.859	0.000254252	P
GO	GO_REGULATION_OF_MICROTUBULE_BASED_PROCESS	-2.85883	0.000135236	N
GO	GO_SIGNAL_TRANSDUCTION_IN_RESPONSE_TO_DNA_DAMAGE	-2.85659	0.000136338	N
GO	GO_MHC_CLASS_II_RECEPTOR_ACTIVITY	-2.8559	0.000298424	N
GO	GO_REGULATION_OF_INTERLEUKIN_12_PRODUCTION	-2.85581	0.000136707	N
GO	GO_PHOSPHATE_CONTAINING_COMPOUND_METABOLIC_PROCESS	-2.8551	0.000137778	N
GO	GO_REGULATION_OF_MITOTIC_CELL_CYCLE	-2.8516	0.000142368	N
GO	GO_CONDENSED_CHROMOSOME_OUTER_KINETOCHORE	-2.8476	0.000142562	N
GO	GO_MULTICELLULAR_ORGANISM_AGING	-2.84249	0.000153128	N
GO	GO_SENSORY_PERCEPTION_OF_CHEMICAL_STIMULUS	2.84127	0.000286163	P
GO	GO_V_D_J_RECOMBINATION	-2.83738	0.000158906	N
GO	GO_POSITIVE_REGULATION_OF_CELLULAR_COMPONENT_ORGANIZATION	2.83619	0.000288862	P
GO	GO_MITOCHONDRION_ORGANIZATION	2.83531	0.000287	P
GO	GO_REGULATION_OF_INFLAMMATORY_RESPONSE	-2.83524	0.000162524	N
GO	GO_MEMBRANE_BUDDING	2.82919	0.000298558	P
GO	GO_REGULATION_OF_INTERLEUKIN_10_PRODUCTION	-2.82602	0.000176286	N
GO	GO_DNA_STRAND_ELONGATION	-2.82274	0.000179735	N
GO	GO_DNA_TEMPLATED_TRANSCRIPTION_INITIATION	2.82038	0.000321109	P
GO	GO_CONDENSED_CHROMOSOME_CENTROMERIC_REGION	-2.81739	0.000163038	N
GO	GO_KINESIN_COMPLEX	-2.81737	0.000153448	N
GO	GO_REGULATION_OF_HEMOPOIESIS	-2.81591	0.000191174	N
GO	GO_DNA_TEMPLATED_TRANSCRIPTION_TERMINATION	2.81302	0.000338679	P
GO	GO_POSITIVE_REGULATION_OF_PROTEIN_MODIFICATION_PROCESS	-2.81223	0.000193772	N
GO	GO_ER_ASSOCIATED_UBIQUITIN_DEPENDENT_PROTEIN_CATABOLIC_PROCESS	2.80795	0.000347125	P
GO	GO_POSITIVE_REGULATION_OF_MULTI_ORGANISM_PROCESS	2.80739	0.000345807	P
GO	GO_POSITIVE_REGULATION_OF_MOLECULAR_FUNCTION	-2.80257	0.000208255	N
GO	GO_PEPTIDE_ANTIGEN_BINDING	-2.79983	0.00044952	N
GO	GO_CELL_SUBSTRATE_ADHESION	2.79761	0.000372168	P
GO	GO_POSITIVE_REGULATION_OF_VIRAL_PROCESS	2.7928	0.000378109	P
GO	GO_NEGATIVE_REGULATION_OF_RESPONSE_TO_STIMULUS	2.7896	0.000387004	P
GO	GO_CELL_ACTIVATION_INVOLVED_IN_IMMUNE_RESPONSE	-2.78836	0.000233748	N
GO	GO_LUMENAL_SIDE_OF_MEMBRANE	-2.78798	0.000202495	N
GO	GO_POSITIVE_REGULATION_OF_PROTEIN_METABOLIC_PROCESS	-2.78697	0.000236033	N
GO	GO_REGULATION_OF_PRODUCTION_OF_MOLECULAR_MEDIATOR_OF_IMMUNE_RESPONSE	-2.78598	0.000235658	N
GO	GO_NEGATIVE_REGULATION_OF_MULTI_ORGANISM_PROCESS	-2.78589	0.000233999	N
GO	GO_MICROTUBULE_BASED_PROCESS	-2.78184	0.000239337	N
GO	GO_NEGATIVE_REGULATION_OF_PROTEIN_METABOLIC_PROCESS	2.78039	0.000412197	P
GO	GO_REGULATION_OF_ALPHA_BETA_T_CELL_ACTIVATION	-2.78005	0.000238961	N
GO	GO_PROTEIN_UBIQUITINATION	2.77861	0.000415509	P
GO	GO_CHROMOSOME_CENTROMERIC_REGION	-2.77329	0.000220935	N
GO	GO_ENDOSOME_ORGANIZATION	2.77283	0.000440127	P
GO	GO_SISTER_CHROMATID_SEGREGATION	-2.77023	0.00026125	N
GO	GO_REGULATION_OF_INTRACELLULAR_SIGNAL_TRANSDUCTION	-2.76879	0.000264485	N
HALLMARK	HALLMARK_MYC_TARGETS_V2	2.76124	0.000122771	P
GO	GO_PROTEIN_PHOSPHORYLATION	-2.76077	0.000278235	N
GO	GO_PYRIMIDINE_NUCLEOSIDE_CATABOLIC_PROCESS	-2.7572	0.000285026	N
GO	GO_NEGATIVE_REGULATION_OF_LYMPHOCYTE_MEDIATED_IMMUNITY	-2.75145	0.000293584	N
GO	GO_REGULATION_OF_B_CELL_ACTIVATION	-2.74955	0.000296467	N
GO	GO_IMMUNOGLOBULIN_PRODUCTION	-2.74875	0.000295124	N
GO	GO_TELOMERE_MAINTENANCE_VIA_RECOMBINATION	-2.74848	0.000295022	N
KEGG	KEGG_VIBRIO_CHOLERAE_INFECTION	2.74378	0.000964332	P
GO	GO_SECRETORY_VESICLE	2.74343	0.000268015	P
GO	GO_RNA_POLYMERASE_COMPLEX	2.73926	0.000267414	P
GO	GO_POSITIVE_REGULATION_OF_CELL_CYCLE	-2.73909	0.000314022	N
GO	GO_PIGMENT_GRANULE_ORGANIZATION	2.73716	0.000586838	P
GO	GO_POSITIVE_REGULATION_OF_T_CELL_MEDIATED_CYTOTOXICITY	-2.73137	0.000328102	N
GO	GO_REGULATION_OF_CYTOKINE_SECRETION	-2.72963	0.000334836	N
GO	GO_POSITIVE_REGULATION_OF_LYMPHOCYTE_DIFFERENTIATION	-2.72921	0.000334466	N
GO	GO_CELLULAR_MACROMOLECULAR_COMPLEX_ASSEMBLY	2.72885	0.000629138	P
GO	GO_POSITIVE_REGULATION_OF_INTRACELLULAR_SIGNAL_TRANSDUCTION	-2.72532	0.000348068	N
GO	GO_ENDOPLASMIC_RETICULUM_ORGANIZATION	2.72423	0.000658886	P
GO	GO_SINGLE_ORGANISM_CATABOLIC_PROCESS	2.72264	0.000662815	P
GO	GO_NUCLEAR_CHROMOSOME_SEGREGATION	-2.72247	0.000357442	N
GO	GO_T_CELL_SELECTION	-2.72031	0.000361485	N
GO	GO_CONDENSED_NUCLEAR_CHROMOSOME_CENTROMERIC_REGION	-2.71881	0.000354568	N
GO	GO_VACUOLAR_MEMBRANE	2.71471	0.000319724	P
GO	GO_DNA_REPLICATION_INITIATION	-2.71411	0.000376903	N
GO	GO_PEPTIDYL_SERINE_MODIFICATION	-2.71349	0.000376277	N
GO	GO_MICROTUBULE_CYTOSKELETON_ORGANIZATION	-2.71298	0.000375618	N
GO	GO_TRANSLATIONAL_ELONGATION	2.71091	0.000712024	P
GO	GO_TRANSCRIPTION_FROM_RNA_POLYMERASE_II_PROMOTER	2.70669	0.000734484	P
GO	GO_REGULATION_OF_VIRAL_ENTRY_INTO_HOST_CELL	-2.69824	0.000422225	N
GO	GO_PROTEIN_KINASE_ACTIVITY	-2.69396	0.0010877	N
GO	GO_LYMPHOCYTE_CHEMOTAXIS	-2.68763	0.000465497	N
GO	GO_SISTER_CHROMATID_COHESION	-2.68581	0.000471037	N
GO	GO_KINETOCHORE	-2.68482	0.000423406	N
GO	GO_UBIQUITIN_LIKE_PROTEIN_LIGASE_ACTIVITY	2.68198	0.00178009	P
GO	GO_NEGATIVE_REGULATION_OF_IMMUNE_RESPONSE	-2.68137	0.000491865	N
GO	GO_DNA_DEPENDENT_ATPASE_ACTIVITY	-2.67692	0.00117046	N
GO	GO_NUCLEAR_EXPORT	2.6747	0.000946183	P
GO	GO_CELLULAR_RESPONSE_TO_PEPTIDE	2.66698	0.000995319	P
GO	GO_CHROMOSOME_SEGREGATION	-2.66621	0.000557871	N
GO	GO_DNA_GEOMETRIC_CHANGE	-2.66543	0.000557294	N
GO	GO_CELLULAR_PIGMENT_ACCUMULATION	2.66472	0.00100177	P
GO	GO_PIGMENT_ACCUMULATION	2.66456	0.000995044	P
GO	GO_ATPASE_ACTIVITY	-2.65745	0.0012785	N
GO	GO_PROTEIN_AUTOPHOSPHORYLATION	-2.65373	0.000610228	N
GO	GO_DNA_HELICASE_ACTIVITY	-2.65202	0.00124543	N
GO	GO_NUCLEIC_ACID_BINDING_TRANSCRIPTION_FACTOR_ACTIVITY	-2.6499	0.00119475	N
GO	GO_GOLGI_MEMBRANE	2.6475	0.000491177	P
GO	GO_POSITIVE_REGULATION_OF_PROTEOLYSIS	-2.64717	0.000639393	N
GO	GO_DNA_SYNTHESIS_INVOLVED_IN_DNA_REPAIR	-2.64543	0.00064098	N
GO	GO_CELLULAR_RESPONSE_TO_STRESS	2.64386	0.00115856	P
GO	GO_REGULATION_OF_CELLULAR_COMPONENT_MOVEMENT	-2.64379	0.000646318	N
GO	GO_ATP_DEPENDENT_MICROTUBULE_MOTOR_ACTIVITY	-2.64104	0.00122655	N
GO	GO_MITOCHONDRIAL_TRANSLATION	2.64094	0.00117793	P
GO	GO_REGULATION_OF_RESPONSE_TO_WOUNDING	-2.63874	0.000671211	N
GO	GO_ENDOSOME	2.63649	0.000516974	P
GO	GO_PROTEIN_CATABOLIC_PROCESS	2.63388	0.00124315	P
HALLMARK	HALLMARK_ADIPOGENESIS	2.63383	0.000339086	P
GO	GO_POSITIVE_REGULATION_OF_VIRAL_RELEASE_FROM_HOST_CELL	2.62853	0.00128844	P
GO	GO_CYTOPLASMIC_VESICLE_PART	2.62812	0.000524942	P
GO	GO_NEGATIVE_REGULATION_OF_HOMOTYPIC_CELL_CELL_ADHESION	-2.62658	0.000749341	N
GO	GO_LYMPHOCYTE_ACTIVATION_INVOLVED_IN_IMMUNE_RESPONSE	-2.62269	0.000766543	N
GO	GO_REGULATION_OF_CELLULAR_PROTEIN_LOCALIZATION	2.62267	0.00134972	P
GO	GO_POSITIVE_REGULATION_OF_HEMOPOIESIS	-2.62177	0.000766307	N
GO	GO_MATURATION_OF_5_8S_RRNA	2.62066	0.00135821	P
GO	GO_TRANSLATIONAL_TERMINATION	2.62043	0.00135077	P
GO	GO_REGULATION_OF_TYPE_I_INTERFERON_PRODUCTION	-2.61863	0.000775453	N
GO	GO_TRANSLATION_PREINITIATION_COMPLEX	2.61854	0.000557279	P
HALLMARK	HALLMARK_MYC_TARGETS_V1	2.61686	0.000299238	P
GO	GO_ANTIGEN_PROCESSING_AND_PRESENTATION_OF_ENDOGENOUS_PEPTIDE_ANTIGEN	-2.61573	0.000786983	N
GO	GO_MISMATCH_REPAIR	-2.61519	0.00078775	N
GO	GO_ALPHA_BETA_T_CELL_DIFFERENTIATION	-2.61154	0.000810274	N
GO	GO_CHEMOKINE_MEDIATED_SIGNALING_PATHWAY	-2.61028	0.000813837	N
GO	GO_REGULATION_OF_INTERLEUKIN_2_PRODUCTION	-2.60671	0.000832436	N
GO	GO_REGULATION_OF_APOPTOTIC_SIGNALING_PATHWAY	2.60438	0.00151094	P
GO	GO_CYTOSKELETON_ORGANIZATION	-2.60375	0.000842402	N
HALLMARK	HALLMARK_IL2_STAT5_SIGNALING	-2.60303	0.000158342	N
GO	GO_RETROGRADE_PROTEIN_TRANSPORT_ER_TO_CYTOSOL	2.59946	0.00155057	P
GO	GO_CELL_CHEMOTAXIS	-2.59377	0.000905897	N
GO	GO_POSITIVE_REGULATION_OF_BIOSYNTHETIC_PROCESS	2.59276	0.00163406	P
GO	GO_SINGLE_ORGANISM_CELL_ADHESION	-2.59056	0.000930681	N
GO	GO_RIBOSOMAL_SMALL_SUBUNIT_ASSEMBLY	2.58931	0.00166363	P
GO	GO_POSITIVE_REGULATION_OF_LEUKOCYTE_DIFFERENTIATION	-2.58918	0.000938457	N
GO	GO_NEGATIVE_REGULATION_OF_LEUKOCYTE_MEDIATED_IMMUNITY	-2.58518	0.000971581	N
GO	GO_PRODUCTION_OF_MOLECULAR_MEDIATOR_OF_IMMUNE_RESPONSE	-2.58103	0.000995126	N
GO	GO_KINASE_BINDING	-2.58044	0.00192976	N
GO	GO_T_CELL_DIFFERENTIATION_INVOLVED_IN_IMMUNE_RESPONSE	-2.58031	0.000994235	N
GO	GO_MEDIATOR_COMPLEX	2.58029	0.000726248	P
GO	GO_MOVEMENT_OF_CELL_OR_SUBCELLULAR_COMPONENT	-2.57823	0.00100343	N
GO	GO_GUANYL_NUCLEOTIDE_EXCHANGE_FACTOR_ACTIVITY	-2.57045	0.00200534	N
GO	GO_LEUKOCYTE_HOMEOSTASIS	-2.56885	0.00107772	N
GO	GO_PROTEIN_COMPLEX_SUBUNIT_ORGANIZATION	2.56725	0.00195105	P
GO	GO_NEGATIVE_REGULATION_OF_CELL_COMMUNICATION	2.5641	0.00199188	P
GO	GO_EUKARYOTIC_TRANSLATION_INITIATION_FACTOR_3_COMPLEX	2.56271	0.000787666	P
GO	GO_NUCLEAR_CHROMOSOME	-2.5601	0.000980262	N
GO	GO_ANTIGEN_PROCESSING_AND_PRESENTATION_OF_ENDOGENOUS_ANTIGEN	-2.55974	0.0011526	N
GO	GO_ORGANELLE_FISSION	-2.55902	0.00115658	N
GO	GO_NEGATIVE_REGULATION_OF_CELL_CYCLE_PROCESS	-2.55662	0.00117516	N
GO	GO_B_CELL_ACTIVATION	-2.55583	0.00117804	N
GO	GO_REGULATION_OF_INTERLEUKIN_6_PRODUCTION	-2.55364	0.00119545	N
GO	GO_PHOSPHORYLATION	-2.55186	0.00120562	N
GO	GO_TRANSITION_METAL_ION_BINDING	2.55116	0.00435771	P
KEGG	KEGG_MTOR_SIGNALING_PATHWAY	2.55111	0.0033544	P
GO	GO_SECRETORY_GRANULE	2.54408	0.000893791	P
GO	GO_POSITIVE_REGULATION_OF_IMMUNOGLOBULIN_MEDIATED_IMMUNE_RESPONSE	-2.54055	0.00130995	N
GO	GO_DNA_STRAND_ELONGATION_INVOLVED_IN_DNA_REPLICATION	-2.53824	0.00132775	N
GO	GO_REGULATION_OF_MULTICELLULAR_ORGANISMAL_DEVELOPMENT	-2.5363	0.00134027	N
GO	GO_CELLULAR_RESPONSE_TO_INSULIN_STIMULUS	2.53579	0.00243054	P
GO	GO_MICROTUBULE_ORGANIZING_CENTER_ORGANIZATION	-2.53451	0.00135094	N
KEGG	KEGG_CELL_CYCLE	-2.53355	0.000983783	N
GO	GO_CELLULAR_RESPONSE_TO_DNA_DAMAGE_STIMULUS	-2.5318	0.00137372	N
GO	GO_CLATHRIN_COATED_ENDOCYTIC_VESICLE_MEMBRANE	-2.53085	0.00123888	N
GO	GO_REGULATION_OF_LEUKOCYTE_APOPTOTIC_PROCESS	-2.53056	0.00137867	N
GO	GO_CELL_MATRIX_ADHESION	2.52948	0.00254375	P
GO	GO_CELLULAR_RESPONSE_TO_TOPOLOGICALLY_INCORRECT_PROTEIN	2.52943	0.00252462	P
GO	GO_SOMATIC_DIVERSIFICATION_OF_IMMUNOGLOBULINS	-2.52933	0.00138537	N
GO	GO_PROTEASOME_CORE_COMPLEX	-2.52715	0.00123642	N
GO	GO_PROTEOLYSIS	2.52541	0.0025884	P
GO	GO_DETERMINATION_OF_ADULT_LIFESPAN	-2.52244	0.00145231	N
GO	GO_PROTEIN_EXIT_FROM_ENDOPLASMIC_RETICULUM	2.52232	0.00263672	P
GO	GO_MULTIVESICULAR_BODY_ORGANIZATION	2.51889	0.00268442	P
GO	GO_REGULATION_OF_CELL_CYCLE_PHASE_TRANSITION	-2.51775	0.00149203	N
GO	GO_NEGATIVE_REGULATION_OF_CELL_CYCLE_PHASE_TRANSITION	-2.51589	0.00151187	N
GO	GO_CCR_CHEMOKINE_RECEPTOR_BINDING	-2.51512	0.00290797	N
GO	GO_POSITIVE_REGULATION_OF_B_CELL_MEDIATED_IMMUNITY	-2.51502	0.00151381	N
GO	GO_MITOCHONDRIAL_ENVELOPE	2.51482	0.00108035	P
GO	GO_NON_MEMBRANE_SPANNING_PROTEIN_TYROSINE_KINASE_ACTIVITY	-2.50883	0.00290753	N
GO	GO_SPINDLE_MICROTUBULE	-2.50746	0.00137241	N
GO	GO_LEUKOCYTE_CHEMOTAXIS	-2.50621	0.00161079	N
GO	GO_UBIQUITIN_LIKE_PROTEIN_BINDING	2.50537	0.0057989	P
GO	GO_ANTIGEN_BINDING	-2.50506	0.00286993	N
GO	GO_CELLULAR_RESPONSE_TO_CARBOHYDRATE_STIMULUS	2.5043	0.00300344	P
GO	GO_RIBONUCLEOPROTEIN_COMPLEX_LOCALIZATION	2.50327	0.00301233	P
GO	GO_POSITIVE_REGULATION_OF_STRESS_ACTIVATED_PROTEIN_KINASE_SIGNALING_CASCADE	-2.50282	0.0016462	N
GO	GO_POSITIVE_REGULATION_OF_PHOSPHORUS_METABOLIC_PROCESS	-2.50124	0.00166008	N
GO	GO_REGULATION_OF_ORGANELLE_ORGANIZATION	2.49976	0.0030775	P
GO	GO_MICROTUBULE_ORGANIZING_CENTER_PART	-2.49883	0.00137112	N
GO	GO_POSITIVE_REGULATION_OF_CELLULAR_PROTEIN_CATABOLIC_PROCESS	-2.49818	0.00168552	N
GO	GO_POSITIVE_REGULATION_OF_PHOSPHATE_METABOLIC_PROCESS	-2.49695	0.00169354	N
GO	GO_MHC_CLASS_II_PROTEIN_COMPLEX_BINDING	-2.49494	0.00301735	N
GO	GO_POSITIVE_REGULATION_OF_GENE_EXPRESSION	2.49489	0.00317166	P
GO	GO_ANAPHASE_PROMOTING_COMPLEX_DEPENDENT_CATABOLIC_PROCESS	-2.49345	0.00173357	N
GO	GO_CELLULAR_COMPONENT_DISASSEMBLY	2.49323	0.00318767	P
GO	GO_REGULATION_OF_EXOSOMAL_SECRETION	2.48981	0.00324144	P
GO	GO_T_CELL_RECEPTOR_COMPLEX	-2.4869	0.00147724	N
GO	GO_ENDOCYTOSIS	2.4843	0.00334822	P
GO	GO_POSITIVE_REGULATION_OF_TOR_SIGNALING	2.48212	0.00337923	P
GO	GO_RNA_CAPPING	2.47869	0.00344046	P
GO	GO_POSITIVE_REGULATION_OF_T_CELL_MEDIATED_IMMUNITY	-2.47598	0.00198011	N
GO	GO_REGULATION_OF_CELLULAR_COMPONENT_BIOGENESIS	2.4732	0.00354987	P
GO	GO_REGULATION_OF_TOR_SIGNALING	2.46971	0.00362042	P
GO	GO_7_METHYLGUANOSINE_RNA_CAPPING	2.46858	0.00362447	P
GO	GO_PROTEIN_DOMAIN_SPECIFIC_BINDING	2.46856	0.00746036	P
GO	GO_MIDBODY	2.46851	0.00152836	P
GO	GO_THYMIC_T_CELL_SELECTION	-2.46754	0.00208737	N
GO	GO_MICROTUBULE_BINDING	-2.4671	0.00369283	N
GO	GO_REGULATION_OF_PHOSPHORUS_METABOLIC_PROCESS	2.46482	0.00369844	P
GO	GO_REGULATION_OF_ACTIVATED_T_CELL_PROLIFERATION	-2.46439	0.00213095	N
GO	GO_CYTOKINE_RECEPTOR_BINDING	-2.46395	0.003647	N
GO	GO_MEMBRANE_PROTEIN_COMPLEX	2.46012	0.00159483	P
GO	GO_REGULATION_OF_REGULATORY_T_CELL_DIFFERENTIATION	-2.45929	0.00221054	N
GO	GO_T_CELL_MIGRATION	-2.45787	0.00222099	N
GO	GO_CONDENSED_NUCLEAR_CHROMOSOME	-2.45662	0.00182999	N
GO	GO_RESPONSE_TO_PEPTIDE	2.45264	0.00402239	P
GO	GO_NUCLEOBASE_CONTAINING_COMPOUND_TRANSPORT	2.45243	0.00400079	P
GO	GO_MULTI_ORGANISM_MEMBRANE_BUDDING	2.45016	0.00403658	P
GO	GO_CELL_CYCLE_PHASE_TRANSITION	-2.45007	0.00234143	N
GO	GO_TAXIS	-2.44951	0.0023379	N
GO	GO_NITROGEN_COMPOUND_TRANSPORT	2.44395	0.00419091	P
GO	GO_VIRAL_BUDDING	2.44315	0.00418833	P
GO	GO_HOMEOSTATIC_PROCESS	-2.44302	0.00244727	N
GO	GO_CYTOKINE_ACTIVITY	-2.44282	0.00413786	N
HALLMARK	HALLMARK_HYPOXIA	2.44153	0.00125371	P
GO	GO_RECEPTOR_MEDIATED_ENDOCYTOSIS	2.44101	0.0042188	P
GO	GO_TISSUE_DEVELOPMENT	2.43875	0.004258	P
GO	GO_CENTRIOLE	-2.43782	0.00202893	N
GO	GO_RESPONSE_TO_INTERFERON_BETA	-2.43274	0.00264278	N
GO	GO_REGULATION_OF_CELL_CYCLE	-2.43259	0.00263425	N
GO	GO_POSITIVE_REGULATION_OF_RESPONSE_TO_WOUNDING	-2.432	0.00263841	N
GO	GO_REGULATION_OF_LYMPHOCYTE_APOPTOTIC_PROCESS	-2.43171	0.0026324	N
GO	GO_MULTI_ORGANISM_ORGANELLE_ORGANIZATION	2.43159	0.00447946	P
GO	GO_PLASMA_LIPOPROTEIN_PARTICLE_CLEARANCE	2.43062	0.00447727	P
GO	GO_MOLECULAR_FUNCTION_REGULATOR	2.43011	0.00919764	P
GO	GO_SPINDLE_ASSEMBLY	-2.42855	0.00267033	N
GO	GO_MACROMOLECULAR_COMPLEX_DISASSEMBLY	2.42796	0.00454124	P
GO	GO_SPHINGOLIPID_METABOLIC_PROCESS	2.42764	0.00452437	P
GO	GO_MITOTIC_SPINDLE_ORGANIZATION	-2.42625	0.0027083	N
GO	GO_REGULATION_OF_RESPONSE_TO_EXTERNAL_STIMULUS	2.41899	0.0047974	P
GO	GO_DNA_BIOSYNTHETIC_PROCESS	-2.41849	0.00286769	N
GO	GO_ZINC_ION_BINDING	2.41584	0.00963721	P
GO	GO_VACUOLE_ORGANIZATION	2.41399	0.00492992	P
GO	GO_HYDROLASE_ACTIVITY_ACTING_ON_ACID_ANHYDRIDES	-2.41294	0.00498464	N
GO	GO_L_ASCORBIC_ACID_BINDING	2.4129	0.00928954	P
GO	GO_B_CELL_MEDIATED_IMMUNITY	-2.40994	0.00303052	N
GO	GO_REGULATION_OF_MICROTUBULE_POLYMERIZATION_OR_DEPOLYMERIZATION	-2.40887	0.00304154	N
KEGG	KEGG_OLFACTORY_TRANSDUCTION	-2.40792	0.00239576	N
GO	GO_REGULATION_OF_CYTOSKELETON_ORGANIZATION	-2.40626	0.00308162	N
GO	GO_UBIQUITIN_DEPENDENT_PROTEIN_CATABOLIC_PROCESS_VIA_THE_MULTIVESICULAR_BODY_SORTING_PATHWAY	2.4047	0.00522714	P
GO	GO_ACTIVATION_OF_CYSTEINE_TYPE_ENDOPEPTIDASE_ACTIVITY	-2.40439	0.00310889	N
GO	GO_LEUKOCYTE_MIGRATION	-2.40324	0.00312614	N
GO	GO_NEGATIVE_REGULATION_OF_LEUKOCYTE_PROLIFERATION	-2.40311	0.00311638	N
GO	GO_ENZYME_REGULATOR_ACTIVITY	2.40268	0.00943434	P
GO	GO_ANTIGEN_PROCESSING_AND_PRESENTATION_OF_EXOGENOUS_PEPTIDE_ANTIGEN_VIA_MHC_CLASS_I	-2.40022	0.00316988	N
GO	GO_MEMBRANE_LIPID_METABOLIC_PROCESS	2.39901	0.00540694	P
GO	GO_SMALL_MOLECULE_METABOLIC_PROCESS	2.39836	0.00539847	P
GO	GO_REGULATION_OF_PROTEIN_UBIQUITINATION_INVOLVED_IN_UBIQUITIN_DEPENDENT_PROTEIN_CATABOLIC_PROCESS	-2.39694	0.00324149	N
GO	GO_PSEUDOURIDINE_SYNTHESIS	2.39391	0.00554889	P
GO	GO_RESPONSE_TO_INSULIN	2.39236	0.00558916	P
GO	GO_PROTEIN_HYDROXYLATION	2.38712	0.00577372	P
GO	GO_ESCRT_III_COMPLEX	2.38393	0.00280968	P
GO	GO_CELLULAR_RESPONSE_TO_ENDOGENOUS_STIMULUS	2.38174	0.00598402	P
GO	GO_PHAGOSOME_ACIDIFICATION	2.38097	0.00599226	P
GO	GO_NEGATIVE_REGULATION_OF_MULTICELLULAR_ORGANISMAL_PROCESS	-2.37825	0.00369169	N
GO	GO_TRANSLATION_INITIATION_FACTOR_BINDING	2.37336	0.011106	P
GO	GO_REGULATION_OF_B_CELL_PROLIFERATION	-2.37239	0.00384547	N
GO	GO_CERAMIDE_METABOLIC_PROCESS	2.37179	0.00637146	P
GO	GO_CELLULAR_RESPONSE_TO_ALCOHOL	-2.37159	0.00385266	N
GO	GO_NEGATIVE_REGULATION_OF_GENE_EXPRESSION	2.3689	0.0064744	P
GO	GO_DEVELOPMENTAL_PIGMENTATION	2.3676	0.0064946	P
GO	GO_PHOSPHORIC_DIESTER_HYDROLASE_ACTIVITY	-2.36639	0.00669986	N
GO	GO_REGULATION_OF_INTERFERON_GAMMA_BIOSYNTHETIC_PROCESS	-2.3637	0.00406561	N
GO	GO_REGULATION_OF_MITOCHONDRION_ORGANIZATION	2.36262	0.00669689	P
GO	GO_MITOTIC_NUCLEAR_DIVISION	-2.36247	0.00408366	N
GO	GO_RESPONSE_TO_ENDOGENOUS_STIMULUS	2.36246	0.00666976	P
GO	GO_LIPID_PARTICLE	2.36174	0.00327258	P
GO	GO_CYSTEINE_TYPE_ENDOPEPTIDASE_ACTIVITY_INVOLVED_IN_APOPTOTIC_PROCESS	-2.36102	0.00670633	N
GO	GO_NEGATIVE_REGULATION_OF_NITROGEN_COMPOUND_METABOLIC_PROCESS	2.35803	0.00684751	P
GO	GO_TRANSCRIPTION_COUPLED_NUCLEOTIDE_EXCISION_REPAIR	2.35745	0.00683827	P
GO	GO_COENZYME_BINDING	-2.35685	0.00669407	N
GO	GO_REGULATION_OF_T_CELL_CYTOKINE_PRODUCTION	-2.35639	0.00425248	N
GO	GO_REGULATION_OF_SEQUENCE_SPECIFIC_DNA_BINDING_TRANSCRIPTION_FACTOR_ACTIVITY	2.3563	0.00685953	P
GO	GO_POSITIVE_REGULATION_OF_CYTOKINE_SECRETION	-2.35537	0.00425984	N
GO	GO_3_5_DNA_HELICASE_ACTIVITY	-2.35327	0.00666529	N
GO	GO_POSITIVE_REGULATION_OF_INTERFERON_ALPHA_PRODUCTION	-2.35221	0.00434151	N
GO	GO_REGULATION_OF_B_CELL_MEDIATED_IMMUNITY	-2.35171	0.00433878	N
GO	GO_UBIQUITIN_LIKE_PROTEIN_LIGASE_BINDING	2.35119	0.0123758	P
GO	GO_NUCLEAR_TRANSCRIPTION_FACTOR_COMPLEX	2.35033	0.00349109	P
GO	GO_RNA_POLYMERASE_II_TRANSCRIPTION_FACTOR_COMPLEX	2.35028	0.00342644	P
GO	GO_CELL_DIVISION	-2.34826	0.00443708	N
GO	GO_CELL_SURFACE	-2.34806	0.00379113	N
GO	GO_PIGMENT_CELL_DIFFERENTIATION	2.34728	0.0073085	P
GO	GO_CELLULAR_PIGMENTATION	2.34618	0.00732457	P
GO	GO_REGULATION_OF_ALPHA_BETA_T_CELL_PROLIFERATION	-2.3431	0.00458444	N
GO	GO_INTRINSIC_COMPONENT_OF_PLASMA_MEMBRANE	-2.34284	0.00382633	N
GO	GO_CLATHRIN_COATED_ENDOCYTIC_VESICLE	-2.33734	0.00381462	N
GO	GO_LOCOMOTION	2.33698	0.007769	P
GO	GO_RETROGRADE_TRANSPORT_ENDOSOME_TO_GOLGI	2.33642	0.00776081	P
GO	GO_GRANULOCYTE_MIGRATION	-2.33219	0.00492209	N
GO	GO_CELLULAR_RESPONSE_TO_NITROGEN_COMPOUND	2.33128	0.00798813	P
GO	GO_DISRUPTION_OF_CELLS_OF_OTHER_ORGANISM	2.3311	0.00795767	P
GO	GO_REGULATION_OF_PROTEIN_SERINE_THREONINE_KINASE_ACTIVITY	2.32699	0.00814109	P
GO	GO_MCM_COMPLEX	-2.32671	0.00399305	N
GO	GO_CARBOHYDRATE_DERIVATIVE_BIOSYNTHETIC_PROCESS	2.32628	0.00813872	P
GO	GO_IDENTICAL_PROTEIN_BINDING	2.32604	0.0139871	P
GO	GO_POSITIVE_REGULATION_OF_ALPHA_BETA_T_CELL_PROLIFERATION	-2.32506	0.00514888	N
GO	GO_SMN_SM_PROTEIN_COMPLEX	2.32444	0.00399753	P
GO	GO_MYELOID_LEUKOCYTE_MIGRATION	-2.32221	0.00524402	N
GO	GO_POSITIVE_REGULATION_OF_ALPHA_BETA_T_CELL_ACTIVATION	-2.31973	0.00533176	N
GO	GO_BEHAVIOR	2.31931	0.00851134	P
GO	GO_POSITIVE_REGULATION_OF_CHROMOSOME_ORGANIZATION	-2.31923	0.00533168	N
GO	GO_CELL_PROJECTION	2.31881	0.0040707	P
GO	GO_SPLICEOSOMAL_SNRNP_ASSEMBLY	2.31696	0.00860414	P
GO	GO_REPLICATIVE_SENESCENCE	-2.31619	0.00541404	N
GO	GO_LATE_ENDOSOME_MEMBRANE	2.31601	0.00408053	P
GO	GO_VESICLE_MEMBRANE	2.31076	0.00417696	P
GO	GO_TRNA_MODIFICATION	2.31048	0.00897799	P
GO	GO_REGULATION_OF_CELL_DEVELOPMENT	2.31046	0.0089313	P
GO	GO_VESICLE_LUMEN	2.31045	0.00411649	P
GO	GO_PROTEIN_COMPLEX_BINDING	-2.31001	0.0087382	N
GO	GO_ISOMERASE_ACTIVITY	2.3097	0.0148803	P
GO	GO_ANTIGEN_PROCESSING_AND_PRESENTATION_OF_PEPTIDE_ANTIGEN_VIA_MHC_CLASS_I	-2.30909	0.00565767	N
GO	GO_DNA_DIRECTED_RNA_POLYMERASE_II_CORE_COMPLEX	2.30889	0.00408778	P
HALLMARK	HALLMARK_MITOTIC_SPINDLE	-2.30882	0.00137392	N
GO	GO_DNA_REPAIR	-2.3083	0.00566375	N
GO	GO_RNA_3_END_PROCESSING	2.30699	0.00910814	P
GO	GO_LOCALIZATION_OF_CELL	2.30659	0.00908043	P
GO	GO_RHO_GUANYL_NUCLEOTIDE_EXCHANGE_FACTOR_ACTIVITY	-2.305	0.00880713	N
GO	GO_RESPONSE_TO_TOPOLOGICALLY_INCORRECT_PROTEIN	2.30389	0.00919523	P
GO	GO_LAMELLIPODIUM	2.30376	0.00415486	P
GO	GO_MITOCHONDRIAL_PART	2.30371	0.00408785	P
GO	GO_KILLING_OF_CELLS_OF_OTHER_ORGANISM	2.30225	0.00924848	P
GO	GO_RESPONSE_TO_NITROGEN_COMPOUND	2.30224	0.00920105	P
GO	GO_POSITIVE_REGULATION_OF_CELL_DEATH	-2.30075	0.00593697	N
GO	GO_NEGATIVE_REGULATION_OF_VIRAL_ENTRY_INTO_HOST_CELL	-2.30037	0.00593138	N
GO	GO_NEGATIVE_REGULATION_OF_TYPE_I_INTERFERON_PRODUCTION	-2.29445	0.00616726	N
GO	GO_RNA_LOCALIZATION	2.29344	0.00975525	P
GO	GO_CELL_MOTILITY	2.29327	0.00971789	P
GO	GO_MULTI_ORGANISM_MEMBRANE_ORGANIZATION	2.2927	0.00970493	P
GO	GO_POSITIVE_REGULATION_OF_RESPONSE_TO_EXTERNAL_STIMULUS	-2.29269	0.00621342	N
GO	GO_LYSOSOMAL_LUMEN	2.29197	0.00432711	P
GO	GO_HYDROLASE_ACTIVITY_ACTING_ON_CARBON_NITROGEN_BUT_NOT_PEPTIDE_BONDS_IN_CYCLIC_AMIDINES	-2.2861	0.00977137	N
GO	GO_RNA_HELICASE_ACTIVITY	2.28461	0.0170064	P
GO	GO_CEREBELLAR_PURKINJE_CELL_DIFFERENTIATION	-2.28132	0.00670571	N
GO	GO_OXIDOREDUCTASE_ACTIVITY_ACTING_ON_PAIRED_DONORS_WITH_INCORPORATION_OR_REDUCTION_OF_MOLECULAR_OXYGEN_2_OXOGLUTARATE_AS_ONE_DONOR_AND_INCORPORATION_OF_ONE_ATOM_EACH_OF_OXYGEN_INTO_BOTH_DONORS	2.27743	0.0172148	P
KEGG	KEGG_HEMATOPOIETIC_CELL_LINEAGE	-2.2771	0.00524365	N
GO	GO_EXTRACELLULAR_MATRIX_BINDING	2.27544	0.0166973	P
GO	GO_RAC_GTPASE_BINDING	2.27531	0.0160719	P
GO	GO_ANTIOXIDANT_ACTIVITY	2.27044	0.0160042	P
KEGG	KEGG_JAK_STAT_SIGNALING_PATHWAY	-2.26899	0.00525058	N
GO	GO_REGULATION_OF_TRANSPORT	2.26679	0.0115177	P
GO	GO_DNA_DAMAGE_RESPONSE_SIGNAL_TRANSDUCTION_RESULTING_IN_TRANSCRIPTION	-2.26571	0.00745845	N
GO	GO_GTPASE_BINDING	2.26561	0.0159762	P
GO	GO_POSITIVE_REGULATION_OF_CELL_CYCLE_ARREST	-2.26515	0.00745751	N
GO	GO_INSULIN_RECEPTOR_SIGNALING_PATHWAY	2.26356	0.0117232	P
GO	GO_MHC_CLASS_I_PROTEIN_COMPLEX	-2.2626	0.0062446	N
GO	GO_CEREBELLAR_PURKINJE_CELL_LAYER_FORMATION	-2.26137	0.00763393	N
GO	GO_ACTIVATION_OF_INNATE_IMMUNE_RESPONSE	-2.26041	0.0076555	N
GO	GO_SPINDLE	-2.2591	0.00619723	N
GO	GO_REGULATION_OF_INTERLEUKIN_1_BETA_PRODUCTION	-2.25605	0.00786977	N
GO	GO_DNA_CONFORMATION_CHANGE	-2.25507	0.00789248	N
GO	GO_NEGATIVE_REGULATION_OF_CELL_ADHESION	-2.25497	0.0078685	N
GO	GO_INTRAMOLECULAR_OXIDOREDUCTASE_ACTIVITY_INTERCONVERTING_ALDOSES_AND_KETOSES	2.25387	0.0167641	P
GO	GO_T_CELL_DIFFERENTIATION_IN_THYMUS	-2.25306	0.00793655	N
GO	GO_MICROTUBULE_MOTOR_ACTIVITY	-2.25255	0.0119905	N
GO	GO_CYTOKINE_RECEPTOR_ACTIVITY	-2.25156	0.011769	N
HALLMARK	HALLMARK_IL6_JAK_STAT3_SIGNALING	-2.25135	0.00184158	N
KEGG	KEGG_NEUROTROPHIN_SIGNALING_PATHWAY	2.24987	0.0194887	P
GO	GO_EXTRACELLULAR_SPACE	2.24962	0.00574906	P
GO	GO_NEGATIVE_REGULATION_OF_INNATE_IMMUNE_RESPONSE	-2.2455	0.00832827	N
GO	GO_POSITIVE_REGULATION_OF_CHROMATIN_MODIFICATION	-2.24545	0.00830123	N
GO	GO_REGULATION_OF_I_KAPPAB_KINASE_NF_KAPPAB_SIGNALING	-2.24519	0.00828717	N
GO	GO_THYMOCYTE_AGGREGATION	-2.24433	0.0083031	N
GO	GO_SH3_SH2_ADAPTOR_ACTIVITY	-2.24336	0.0121083	N
GO	GO_PROTEIN_K48_LINKED_UBIQUITINATION	2.24077	0.0137138	P
GO	GO_T_CELL_ACTIVATION_INVOLVED_IN_IMMUNE_RESPONSE	-2.23934	0.00856757	N
GO	GO_REGULATION_OF_CYTOKINE_PRODUCTION_INVOLVED_IN_IMMUNE_RESPONSE	-2.23838	0.00858171	N
GO	GO_MITOCHONDRIAL_TRANSPORT	2.23811	0.0138914	P
GO	GO_POSITIVE_REGULATION_OF_CD4_POSITIVE_ALPHA_BETA_T_CELL_ACTIVATION	-2.23737	0.00861581	N
GO	GO_NEGATIVE_REGULATION_OF_CATALYTIC_ACTIVITY	2.2371	0.0139042	P
GO	GO_MHC_CLASS_I_PROTEIN_BINDING	-2.23585	0.0124131	N
GO	GO_REGULATION_OF_ENDOCYTOSIS	2.23446	0.0140744	P
GO	GO_VESICLE_ORGANIZATION	2.23235	0.0142028	P
GO	GO_MICROTUBULE_CYTOSKELETON_ORGANIZATION_INVOLVED_IN_MITOSIS	-2.23091	0.00898208	N
GO	GO_ENDOPLASMIC_RETICULUM_TO_CYTOSOL_TRANSPORT	2.23005	0.0143636	P
GO	GO_REGULATION_OF_SMOOTH_MUSCLE_CELL_PROLIFERATION	-2.22874	0.00908369	N
GO	GO_TUBULIN_BINDING	-2.22747	0.0128933	N
GO	GO_REGULATORY_REGION_NUCLEIC_ACID_BINDING	-2.226	0.0127055	N
GO	GO_PIGMENTATION	2.22543	0.0147669	P
GO	GO_T_CELL_MEDIATED_IMMUNITY	-2.22429	0.00932174	N
GO	GO_NEGATIVE_REGULATION_OF_CELL_CELL_ADHESION	-2.221	0.00950086	N
GO	GO_MACROMOLECULAR_COMPLEX_BINDING	-2.22062	0.0128696	N
GO	GO_MULTI_ORGANISM_BEHAVIOR	2.2198	0.0152795	P
KEGG	KEGG_CHEMOKINE_SIGNALING_PATHWAY	-2.21935	0.00702375	N
HALLMARK	HALLMARK_PROTEIN_SECRETION	2.21893	0.00534279	P
GO	GO_REGULATION_OF_AUTOPHAGOSOME_ASSEMBLY	2.21857	0.0153325	P
GO	GO_REGULATION_OF_CELL_DIFFERENTIATION	2.21729	0.0153992	P
GO	GO_CARBOHYDRATE_DERIVATIVE_METABOLIC_PROCESS	2.21726	0.0153304	P
GO	GO_COATED_VESICLE	-2.21667	0.00803085	N
GO	GO_MITOTIC_SPINDLE_ASSEMBLY	-2.21447	0.00990608	N
GO	GO_THREONINE_TYPE_PEPTIDASE_ACTIVITY	-2.21382	0.0131422	N
GO	GO_REGULATION_OF_CYTOKINE_BIOSYNTHETIC_PROCESS	-2.21372	0.00991615	N
GO	GO_INFLAMMASOME_COMPLEX	-2.21371	0.00796408	N
GO	GO_ACTIN_CYTOSKELETON	2.21323	0.00727869	P
GO	GO_NEGATIVE_REGULATION_OF_LYMPHOCYTE_APOPTOTIC_PROCESS	-2.21075	0.0100639	N
GO	GO_NEGATIVE_REGULATION_OF_PROTEIN_COMPLEX_DISASSEMBLY	-2.21037	0.0100568	N
HALLMARK	HALLMARK_CHOLESTEROL_HOMEOSTASIS	2.21037	0.00490718	P
GO	GO_NAD_ADP_RIBOSYLTRANSFERASE_ACTIVITY	-2.2103	0.0131642	N
GO	GO_PROTEIN_STABILIZATION	2.20873	0.0161198	P
GO	GO_PEPTIDYL_TYROSINE_AUTOPHOSPHORYLATION	-2.20846	0.010154	N
GO	GO_FATTY_ACID_CATABOLIC_PROCESS	-2.20823	0.0101333	N
GO	GO_TRANSCRIPTION_FACTOR_BINDING	2.20732	0.0225415	P
GO	GO_CYTOKINE_SECRETION	-2.20494	0.0103081	N
GO	GO_REGULATION_OF_PROTEOLYSIS	-2.20391	0.0103421	N
GO	GO_DNA_DEPENDENT_DNA_REPLICATION_MAINTENANCE_OF_FIDELITY	-2.20242	0.0104027	N
KEGG	KEGG_FOCAL_ADHESION	2.20196	0.0226805	P
GO	GO_REGULATION_OF_INTERFERON_ALPHA_PRODUCTION	-2.20172	0.010423	N
GO	GO_TUMOR_NECROSIS_FACTOR_RECEPTOR_BINDING	-2.20142	0.0136303	N
GO	GO_TELOMERASE_RNA_BINDING	2.2002	0.0229059	P
GO	GO_CHEMOKINE_ACTIVITY	-2.19806	0.0136342	N
GO	GO_VACUOLAR_LUMEN	2.19718	0.00800781	P
GO	GO_POSITIVE_REGULATION_OF_PEPTIDASE_ACTIVITY	-2.19706	0.0107254	N
GO	GO_REGULATION_OF_RESPONSE_TO_BIOTIC_STIMULUS	-2.19684	0.0107059	N
KEGG	KEGG_PRIMARY_BILE_ACID_BIOSYNTHESIS	2.19627	0.0201662	P
GO	GO_REGULATION_OF_T_HELPER_CELL_DIFFERENTIATION	-2.19412	0.0108658	N
GO	GO_NEGATIVE_REGULATION_OF_CELLULAR_PROTEIN_LOCALIZATION	2.19394	0.0176868	P
GO	GO_SMALL_NUCLEOLAR_RIBONUCLEOPROTEIN_COMPLEX	2.19344	0.00810227	P
GO	GO_REGULATION_OF_INTERLEUKIN_17_PRODUCTION	-2.19301	0.010916	N
GO	GO_MICROTUBULE_BASED_MOVEMENT	-2.19206	0.0109519	N
GO	GO_POSITIVE_REGULATION_OF_PRODUCTION_OF_MOLECULAR_MEDIATOR_OF_IMMUNE_RESPONSE	-2.19198	0.0109199	N
GO	GO_REGULATION_OF_INTERLEUKIN_1_SECRETION	-2.19141	0.0109217	N
GO	GO_POSITIVE_REGULATION_OF_VIRAL_TRANSCRIPTION	2.1896	0.0181465	P
GO	GO_TRANSPORTER_ACTIVITY	2.18918	0.0239976	P
GO	GO_NUCLEAR_SPECK	2.18867	0.00819366	P
GO	GO_CELL_SUBSTRATE_JUNCTION_ASSEMBLY	2.1884	0.018215	P
GO	GO_RESPONSE_TO_MOLECULE_OF_BACTERIAL_ORIGIN	-2.18804	0.0111336	N
GO	GO_POSITIVE_REGULATION_OF_PROTEIN_SECRETION	-2.18564	0.0112903	N
GO	GO_TUMOR_NECROSIS_FACTOR_RECEPTOR_SUPERFAMILY_BINDING	-2.1841	0.014719	N
GO	GO_DETOXIFICATION	2.18403	0.0186545	P
GO	GO_TRANSCRIPTION_FROM_RNA_POLYMERASE_I_PROMOTER	2.181	0.018974	P
GO	GO_LEUKOCYTE_PROLIFERATION	-2.18072	0.0116222	N
GO	GO_RESPONSE_TO_IONIZING_RADIATION	-2.18018	0.0116268	N
GO	GO_EXTRACELLULAR_MATRIX	2.17807	0.00863703	P
GO	GO_REGULATION_OF_IMMUNOGLOBULIN_PRODUCTION	-2.17738	0.0117922	N
GO	GO_BILE_ACID_BIOSYNTHETIC_PROCESS	2.17688	0.0193948	P
GO	GO_SIGNALING_ADAPTOR_ACTIVITY	-2.17565	0.0152616	N
GO	GO_RESPONSE_TO_OXIDATIVE_STRESS	2.17266	0.0198551	P
GO	GO_NEGATIVE_REGULATION_OF_MRNA_METABOLIC_PROCESS	2.17126	0.0199591	P
GO	GO_CELLULAR_DEFENSE_RESPONSE	-2.17072	0.0122787	N
GO	GO_REGULATION_OF_INTRINSIC_APOPTOTIC_SIGNALING_PATHWAY	2.17025	0.020007	P
GO	GO_RESPONSE_TO_GAMMA_RADIATION	-2.16852	0.0124171	N
GO	GO_REGULATION_OF_IMMUNE_RESPONSE_TO_TUMOR_CELL	-2.16817	0.0124044	N
GO	GO_REGULATION_OF_HOMEOSTATIC_PROCESS	-2.16713	0.0124454	N
GO	GO_CELLULAR_COMPONENT_ASSEMBLY_INVOLVED_IN_MORPHOGENESIS	-2.16532	0.0125504	N
GO	GO_REGULATION_OF_CHROMOSOME_ORGANIZATION	-2.16496	0.0125424	N
GO	GO_FATTY_ACYL_COA_BINDING	-2.16464	0.0160152	N
GO	GO_CHEMOKINE_RECEPTOR_BINDING	-2.16386	0.0157866	N
GO	GO_REGULATION_OF_MRNA_METABOLIC_PROCESS	2.16121	0.0211231	P
GO	GO_POSITIVE_REGULATION_OF_NEURON_PROJECTION_DEVELOPMENT	2.16102	0.0210527	P
GO	GO_NEGATIVE_REGULATION_OF_INTERFERON_GAMMA_PRODUCTION	-2.1599	0.0129217	N
HALLMARK	HALLMARK_TNFA_SIGNALING_VIA_NFKB	2.15937	0.00635826	P
GO	GO_DNA_REPAIR_COMPLEX	-2.15932	0.0110493	N
GO	GO_GATED_CHANNEL_ACTIVITY	-2.15901	0.0159996	N
GO	GO_REGULATION_OF_PROTEIN_LOCALIZATION	2.1589	0.0212553	P
GO	GO_REGULATION_OF_RESPONSE_TO_TUMOR_CELL	-2.15857	0.0129872	N
GO	GO_REGULATION_OF_CELL_CYCLE_G2_M_PHASE_TRANSITION	-2.1579	0.0130048	N
GO	GO_HISTONE_KINASE_ACTIVITY	-2.15715	0.0158954	N
GO	GO_COFACTOR_BINDING	-2.15696	0.0156131	N
GO	GO_REGULATION_OF_NEURON_PROJECTION_DEVELOPMENT	2.15692	0.0214335	P
GO	GO_REGULATION_OF_ANTIGEN_PROCESSING_AND_PRESENTATION	-2.15666	0.0130725	N
HALLMARK	HALLMARK_UV_RESPONSE_UP	2.15425	0.00609163	P
GO	GO_NUCLEAR_ENVELOPE	2.15361	0.0100301	P
GO	GO_POSITIVE_T_CELL_SELECTION	-2.15333	0.0133252	N
GO	GO_PRIMARY_LYSOSOME	2.15327	0.00990915	P
GO	GO_POSITIVE_REGULATION_OF_I_KAPPAB_KINASE_NF_KAPPAB_SIGNALING	-2.15151	0.0134454	N
GO	GO_TRANSCRIPTION_FROM_RNA_POLYMERASE_III_PROMOTER	2.1515	0.0221226	P
GO	GO_INTRINSIC_COMPONENT_OF_ORGANELLE_MEMBRANE	2.15129	0.00990971	P
GO	GO_DIVALENT_INORGANIC_CATION_TRANSMEMBRANE_TRANSPORTER_ACTIVITY	2.15044	0.0302933	P
GO	GO_POSITIVE_REGULATION_OF_CELL_DIFFERENTIATION	2.15038	0.0221947	P
HALLMARK	HALLMARK_APOPTOSIS	-2.15033	0.00309354	N
HALLMARK	HALLMARK_ESTROGEN_RESPONSE_EARLY	2.15	0.0057342	P
HALLMARK	HALLMARK_KRAS_SIGNALING_UP	2.14944	0.00530279	P
GO	GO_POSITIVE_REGULATION_OF_ACTIN_NUCLEATION	2.14849	0.022368	P
GO	GO_CILIUM_MORPHOGENESIS	-2.14848	0.0136632	N
GO	GO_ANTIGEN_PROCESSING_AND_PRESENTATION_OF_PEPTIDE_ANTIGEN_VIA_MHC_CLASS_II	-2.14796	0.0136614	N
GO	GO_G1_DNA_DAMAGE_CHECKPOINT	-2.14476	0.0138994	N
GO	GO_IMMUNOLOGICAL_SYNAPSE	-2.14447	0.0119135	N
GO	GO_PERINUCLEAR_REGION_OF_CYTOPLASM	2.14391	0.0102159	P
GO	GO_U2_TYPE_SPLICEOSOMAL_COMPLEX	2.14298	0.0101357	P
GO	GO_ANTIGEN_PROCESSING_AND_PRESENTATION_OF_PEPTIDE_OR_POLYSACCHARIDE_ANTIGEN_VIA_MHC_CLASS_II	-2.14047	0.0142524	N
GO	GO_REGULATION_OF_TYPE_2_IMMUNE_RESPONSE	-2.14035	0.0142192	N
GO	GO_REGULATION_OF_VACUOLE_ORGANIZATION	2.14006	0.0235283	P
GO	GO_INFLAMMATORY_RESPONSE_TO_ANTIGENIC_STIMULUS	-2.13819	0.0143621	N
GO	GO_POSITIVE_REGULATION_OF_TYPE_2_IMMUNE_RESPONSE	-2.13784	0.0143525	N
GO	GO_LATE_ENDOSOME	2.13685	0.0103951	P
GO	GO_POSITIVE_REGULATION_OF_MITOCHONDRION_ORGANIZATION	2.13579	0.0240676	P
GO	GO_CALCIUM_DEPENDENT_PROTEIN_BINDING	2.13186	0.0330529	P
GO	GO_IMMUNOGLOBULIN_PRODUCTION_INVOLVED_IN_IMMUNOGLOBULIN_MEDIATED_IMMUNE_RESPONSE	-2.1317	0.0149101	N
GO	GO_REGULATION_OF_DEFENSE_RESPONSE_TO_VIRUS	-2.13087	0.0149401	N
GO	GO_NEGATIVE_REGULATION_OF_ADAPTIVE_IMMUNE_RESPONSE	-2.12984	0.0149921	N
GO	GO_MRNA_SPLICE_SITE_SELECTION	2.12907	0.0250175	P
GO	GO_REGULATION_OF_CELLULAR_PROTEIN_CATABOLIC_PROCESS	-2.12826	0.0150894	N
KEGG	KEGG_T_CELL_RECEPTOR_SIGNALING_PATHWAY	-2.12539	0.0123556	N
GO	GO_HOMEOSTASIS_OF_NUMBER_OF_CELLS	-2.12538	0.0153235	N
GO	GO_RESPONSE_TO_INTERFERON_ALPHA	-2.12406	0.0153936	N
GO	GO_REGULATION_OF_LIPID_STORAGE	2.12382	0.0257751	P
GO	GO_NUCLEUS_ORGANIZATION	2.12365	0.0257012	P
GO	GO_MICROTUBULE_ASSOCIATED_COMPLEX	-2.12197	0.0133956	N
KEGG	KEGG_SYSTEMIC_LUPUS_ERYTHEMATOSUS	-2.1213	0.0119955	N
GO	GO_TERMINATION_OF_RNA_POLYMERASE_II_TRANSCRIPTION	2.11856	0.0264221	P
GO	GO_CELL_LEADING_EDGE	2.11837	0.0115613	P
GO	GO_REGULATION_OF_T_CELL_APOPTOTIC_PROCESS	-2.11831	0.0159266	N
GO	GO_POSITIVE_REGULATION_OF_INTERLEUKIN_6_PRODUCTION	-2.11663	0.0160502	N
GO	GO_CLATHRIN_COATED_VESICLE_MEMBRANE	-2.11544	0.0136693	N
GO	GO_REGULATION_OF_TRANSCRIPTION_FROM_RNA_POLYMERASE_I_PROMOTER	2.11462	0.0269518	P
GO	GO_CEREBELLAR_PURKINJE_CELL_LAYER_MORPHOGENESIS	-2.11456	0.0162095	N
GO	GO_REGULATION_OF_CELLULAR_LOCALIZATION	2.11454	0.0268495	P
GO	GO_ER_TO_GOLGI_TRANSPORT_VESICLE_MEMBRANE	-2.11383	0.0134922	N
GO	GO_EARLY_ENDOSOME	2.11366	0.0117798	P
GO	GO_NATURAL_KILLER_CELL_MEDIATED_IMMUNITY	-2.11344	0.0162781	N
KEGG	KEGG_LEISHMANIA_INFECTION	-2.11318	0.0119768	N
GO	GO_REGULATION_OF_NEURON_DIFFERENTIATION	2.11318	0.0269613	P
HALLMARK	HALLMARK_P53_PATHWAY	2.11283	0.0061395	P
GO	GO_POSITIVE_REGULATION_OF_DEVELOPMENTAL_PROCESS	2.11198	0.0270576	P
GO	GO_AMINOGLYCAN_BIOSYNTHETIC_PROCESS	2.11184	0.0269716	P
GO	GO_REGULATION_OF_STEM_CELL_POPULATION_MAINTENANCE	2.11135	0.0269499	P
GO	GO_NEUROGENESIS	2.11085	0.0269182	P
GO	GO_CELL_CYCLE_ARREST	2.11071	0.0268316	P
GO	GO_REGULATION_OF_SEQUESTERING_OF_TRIGLYCERIDE	2.11033	0.0267755	P
GO	GO_MATURATION_OF_5_8S_RRNA_FROM_TRICISTRONIC_RRNA_TRANSCRIPT_SSU_RRNA_5_8S_RRNA_LSU_RRNA_	2.10963	0.0267831	P
GO	GO_NEGATIVE_T_CELL_SELECTION	-2.10934	0.0166353	N
GO	GO_LRR_DOMAIN_BINDING	2.10899	0.0370352	P
GO	GO_DOUBLE_STRAND_BREAK_REPAIR	-2.10768	0.0167558	N
GO	GO_POSITIVE_REGULATION_OF_B_CELL_ACTIVATION	-2.10649	0.0168373	N
GO	GO_RESPONSE_TO_PROTOZOAN	-2.10582	0.0168575	N
GO	GO_PROTEIN_SERINE_THREONINE_KINASE_ACTIVITY	-2.10463	0.0215026	N
GO	GO_LYMPH_NODE_DEVELOPMENT	-2.10385	0.0170204	N
GO	GO_GLUCOSE_BINDING	-2.1025	0.0213893	N
GO	GO_ENDOSOMAL_PART	-2.10174	0.014241	N
GO	GO_REGULATION_OF_CELL_PROJECTION_ORGANIZATION	2.1006	0.0282267	P
GO	GO_REGULATION_OF_PROTEIN_EXPORT_FROM_NUCLEUS	-2.10033	0.0173554	N
GO	GO_NEGATIVE_REGULATION_OF_AUTOPHAGY	2.09615	0.0289027	P
GO	GO_GASTRULATION_WITH_MOUTH_FORMING_SECOND	2.09518	0.0289569	P
GO	GO_RESPONSE_TO_BACTERIUM	-2.09466	0.0179072	N
GO	GO_REGULATION_OF_INTERLEUKIN_2_BIOSYNTHETIC_PROCESS	-2.09415	0.017918	N
GO	GO_POSITIVE_REGULATION_OF_HOMEOSTATIC_PROCESS	-2.09368	0.0179169	N
GO	GO_CYTOKINETIC_PROCESS	2.09307	0.0292244	P
GO	GO_POSITIVE_REGULATION_OF_CELL_PROLIFERATION	-2.09241	0.0180066	N
GO	GO_LOCALIZATION_WITHIN_MEMBRANE	2.09179	0.0293398	P
GO	GO_REGULATION_OF_MAP_KINASE_ACTIVITY	2.09143	0.0292819	P
KEGG	KEGG_RENAL_CELL_CARCINOMA	2.09112	0.034946	P
GO	GO_TUMOR_NECROSIS_FACTOR_MEDIATED_SIGNALING_PATHWAY	-2.09073	0.0181451	N
GO	GO_NEGATIVE_REGULATION_OF_RESPONSE_TO_EXTERNAL_STIMULUS	2.09048	0.0293351	P
GO	GO_REGULATION_OF_INTERLEUKIN_4_PRODUCTION	-2.08984	0.0181871	N
GO	GO_REGULATION_OF_MULTI_ORGANISM_PROCESS	-2.088	0.0183476	N
GO	GO_REGULATION_OF_MEMBRANE_PERMEABILITY	2.08645	0.0299328	P
GO	GO_RAS_GUANYL_NUCLEOTIDE_EXCHANGE_FACTOR_ACTIVITY	-2.08474	0.023546	N
HALLMARK	HALLMARK_GLYCOLYSIS	2.08433	0.0069076	P
GO	GO_CHAPERONE_BINDING	2.08386	0.0423264	P
GO	GO_PROTEIN_FOLDING	2.08179	0.0306883	P
GO	GO_MEMBRANE_MICRODOMAIN	2.08172	0.0142961	P
GO	GO_BINDING_BRIDGING	2.08079	0.0419802	P
GO	GO_REGULATION_OF_DENDRITIC_CELL_DIFFERENTIATION	-2.08065	0.0191973	N
GO	GO_NEGATIVE_REGULATION_OF_RNA_SPLICING	2.08046	0.0308188	P
GO	GO_RNA_POLYMERASE_III_ACTIVITY	2.07978	0.0411386	P
GO	GO_CELL_CYCLE_G2_M_PHASE_TRANSITION	-2.07953	0.0192691	N
GO	GO_INTRAMOLECULAR_OXIDOREDUCTASE_ACTIVITY	2.07939	0.0401791	P
GO	GO_PRESPLICEOSOME	2.07864	0.0144006	P
GO	GO_NUCLEOTIDE_EXCISION_REPAIR	2.07738	0.0313067	P
GO	GO_NEGATIVE_REGULATION_OF_CELL_PROLIFERATION	2.07729	0.0312005	P
GO	GO_REGULATION_OF_ANATOMICAL_STRUCTURE_MORPHOGENESIS	2.07614	0.0313045	P
GO	GO_POSITIVE_REGULATION_OF_IMMUNE_RESPONSE_TO_TUMOR_CELL	-2.07611	0.0196125	N
GO	GO_DNA_DIRECTED_RNA_POLYMERASE_III_COMPLEX	2.07528	0.0145493	P
GO	GO_CYTOSKELETAL_PROTEIN_BINDING	-2.07463	0.024667	N
GO	GO_REGULATION_OF_TRANSCRIPTION_FROM_RNA_POLYMERASE_II_PROMOTER	2.07421	0.0315801	P
GO	GO_REGULATION_OF_B_CELL_DIFFERENTIATION	-2.0727	0.019985	N
GO	GO_NEGATIVE_REGULATION_OF_INTRACELLULAR_SIGNAL_TRANSDUCTION	2.07261	0.0317719	P
GO	GO_SMN_COMPLEX	2.07253	0.0146056	P
GO	GO_NEGATIVE_REGULATION_OF_ORGANELLE_ORGANIZATION	-2.07126	0.0201127	N
GO	GO_MISMATCHED_DNA_BINDING	-2.07104	0.0248039	N
GO	GO_POSITIVE_REGULATION_OF_INTERLEUKIN_1_BETA_PRODUCTION	-2.07075	0.0201226	N
GO	GO_LIPID_PARTICLE_ORGANIZATION	2.07064	0.0320378	P
GO	GO_VITAMIN_D_RECEPTOR_BINDING	2.0704	0.0415029	P
GO	GO_ZYMOGEN_ACTIVATION	-2.06813	0.0204002	N
GO	GO_REGULATION_OF_SYMBIOSIS_ENCOMPASSING_MUTUALISM_THROUGH_PARASITISM	-2.06748	0.0204172	N
GO	GO_NEGATIVE_REGULATION_OF_CYTOSKELETON_ORGANIZATION	-2.06673	0.0204553	N
GO	GO_RESPONSE_TO_HORMONE	2.06635	0.0328042	P
GO	GO_PROTEIN_TRANSPORTER_ACTIVITY	2.06559	0.0417209	P
GO	GO_FOLIC_ACID_CONTAINING_COMPOUND_BIOSYNTHETIC_PROCESS	-2.06538	0.0205766	N
GO	GO_POSITIVE_REGULATION_OF_RESPONSE_TO_TUMOR_CELL	-2.06487	0.020581	N
GO	GO_CLATHRIN_COATED_VESICLE	-2.06428	0.0177766	N
GO	GO_REGULATION_OF_MITOCHONDRIAL_MEMBRANE_PERMEABILITY_INVOLVED_IN_APOPTOTIC_PROCESS	2.06413	0.0331164	P
GO	GO_NEGATIVE_REGULATION_OF_TRANSCRIPTION_FACTOR_IMPORT_INTO_NUCLEUS	2.06221	0.0333876	P
GO	GO_POSITIVE_REGULATION_OF_ORGANELLE_ORGANIZATION	-2.06185	0.0209265	N
GO	GO_UBIQUITIN_LIGASE_COMPLEX	2.0614	0.0154125	P
GO	GO_PYRIMIDINE_NUCLEOSIDE_METABOLIC_PROCESS	-2.05998	0.0211082	N
GO	GO_RESPONSE_TO_HYDROGEN_PEROXIDE	2.05936	0.0338395	P
GO	GO_SIGNAL_SEQUENCE_BINDING	2.05871	0.0425352	P
GO	GO_REGULATION_OF_SISTER_CHROMATID_SEGREGATION	-2.05813	0.0212883	N
GO	GO_NEGATIVE_REGULATION_OF_LEUKOCYTE_APOPTOTIC_PROCESS	-2.05712	0.0213641	N
GO	GO_CD4_POSITIVE_ALPHA_BETA_T_CELL_ACTIVATION	-2.05653	0.021383	N
GO	GO_CYTOLYSIS	-2.05556	0.0214487	N
GO	GO_NEGATIVE_REGULATION_OF_CELLULAR_AMIDE_METABOLIC_PROCESS	2.05384	0.0348756	P
GO	GO_SINGLE_ORGANISM_MEMBRANE_BUDDING	2.05243	0.035049	P
GO	GO_CELLULAR_RESPONSE_TO_EXTERNAL_STIMULUS	2.0517	0.0350791	P
HALLMARK	HALLMARK_MTORC1_SIGNALING	2.05098	0.00795971	P
GO	GO_REGULATION_OF_ALPHA_BETA_T_CELL_DIFFERENTIATION	-2.04724	0.0225149	N
GO	GO_CELLULAR_RESPONSE_TO_VASCULAR_ENDOTHELIAL_GROWTH_FACTOR_STIMULUS	-2.04654	0.0225449	N
GO	GO_GTPASE_ACTIVITY	2.04536	0.0451999	P
GO	GO_DOUBLE_STRANDED_DNA_BINDING	-2.04417	0.0288394	N
GO	GO_LIPID_BINDING	-2.04412	0.028365	N
GO	GO_PH_REDUCTION	2.04283	0.036966	P
GO	GO_POSITIVE_REGULATION_OF_LIPID_STORAGE	2.04173	0.0370718	P
GO	GO_MITOCHONDRIAL_MEMBRANE_ORGANIZATION	2.04114	0.0370607	P
GO	GO_BETA_CATENIN_DESTRUCTION_COMPLEX	2.04079	0.0173006	P
GO	GO_LIGASE_ACTIVITY	2.03937	0.0457994	P
GO	GO_PROTEIN_C_TERMINUS_BINDING	2.03906	0.0448454	P
GO	GO_POSITIVE_REGULATION_OF_TRANSPORT	2.03906	0.0373866	P
GO	GO_PYRIMIDINE_CONTAINING_COMPOUND_METABOLIC_PROCESS	-2.03443	0.0242314	N
GO	GO_NEGATIVE_REGULATION_OF_INTERLEUKIN_10_PRODUCTION	-2.03433	0.024179	N
GO	GO_REGULATION_OF_BONE_DEVELOPMENT	2.03388	0.038421	P
GO	GO_REGULATION_OF_ORGANELLE_ASSEMBLY	2.03351	0.0383645	P
GO	GO_REGULATION_OF_TYROSINE_PHOSPHORYLATION_OF_STAT_PROTEIN	-2.0302	0.0247182	N
GO	GO_POSITIVE_REGULATION_OF_IMMUNOGLOBULIN_PRODUCTION	-2.02996	0.0246825	N
GO	GO_REGULATION_OF_CYSTEINE_TYPE_ENDOPEPTIDASE_ACTIVITY	-2.02681	0.0250972	N
GO	GO_TRANSPORT_VESICLE	2.02613	0.0186698	P
GO	GO_REGULATION_OF_SMALL_GTPASE_MEDIATED_SIGNAL_TRANSDUCTION	-2.02561	0.0252172	N
GO	GO_NEGATIVE_REGULATION_OF_HYDROLASE_ACTIVITY	2.02423	0.0404484	P
GO	GO_PROTEIN_DIMERIZATION_ACTIVITY	2.02393	0.0479937	P
GO	GO_PEPTIDYL_PROLINE_HYDROXYLATION	2.02349	0.0404798	P
GO	GO_REGULATION_OF_RECEPTOR_INTERNALIZATION	2.02195	0.0407078	P
GO	GO_REGULATION_OF_CELL_SHAPE	-2.02113	0.0258307	N
GO	GO_PLASMA_MEMBRANE_PROTEIN_COMPLEX	-2.02043	0.0227729	N
GO	GO_CELL_PROJECTION_ORGANIZATION	-2.02038	0.025881	N
GO	GO_ORGANONITROGEN_COMPOUND_CATABOLIC_PROCESS	2.01931	0.0412254	P
GO	GO_REGULATION_OF_MYELOID_LEUKOCYTE_DIFFERENTIATION	2.01902	0.0411574	P
GO	GO_ENDODEOXYRIBONUCLEASE_ACTIVITY	-2.0169	0.0329275	N
GO	GO_HYDROGEN_ION_TRANSMEMBRANE_TRANSPORTER_ACTIVITY	2.01659	0.0489763	P
GO	GO_CELLULAR_COMPONENT_MORPHOGENESIS	-2.01654	0.0264261	N
GO	GO_MONOCARBOXYLIC_ACID_CATABOLIC_PROCESS	-2.01568	0.0264899	N
GO	GO_HISTONE_PHOSPHORYLATION	-2.01543	0.0264567	N
GO	GO_NEGATIVE_REGULATION_OF_DENDRITIC_SPINE_DEVELOPMENT	2.01354	0.0423896	P
GO	GO_NEGATIVE_REGULATION_OF_APOPTOTIC_SIGNALING_PATHWAY	2.01268	0.0424565	P
GO	GO_NEGATIVE_REGULATION_OF_NEURON_DEATH	2.01082	0.0427803	P
GO	GO_SINGLE_STRANDED_DNA_DEPENDENT_ATPASE_ACTIVITY	-2.01019	0.0337361	N
GO	GO_RESPONSE_TO_LIPID	2.00883	0.0431403	P
GO	GO_DNA_DIRECTED_RNA_POLYMERASE_I_COMPLEX	2.00581	0.0208172	P
GO	GO_PHOSPHOLIPID_CATABOLIC_PROCESS	-2.00578	0.0279519	N
GO	GO_NEGATIVE_REGULATION_OF_PROTEIN_MODIFICATION_PROCESS	2.00574	0.0437696	P
GO	GO_PROTEIN_OLIGOMERIZATION	2.00373	0.0441247	P
GO	GO_NEGATIVE_REGULATION_OF_RESPONSE_TO_OXIDATIVE_STRESS	2.00171	0.0445041	P
GO	GO_PHOSPHORIC_ESTER_HYDROLASE_ACTIVITY	-2.00171	0.0349368	N
GO	GO_ORGANELLE_SUBCOMPARTMENT	2.00157	0.0210906	P
GO	GO_NEGATIVE_REGULATION_OF_RELEASE_OF_CYTOCHROME_C_FROM_MITOCHONDRIA	2.00106	0.0445248	P
GO	GO_INTRINSIC_COMPONENT_OF_ENDOPLASMIC_RETICULUM_MEMBRANE	2.00074	0.0209465	P
GO	GO_RECEPTOR_BINDING	-1.99919	0.0348977	N
GO	GO_NEGATIVE_REGULATION_OF_LIPID_TRANSPORT	1.99795	0.0451625	P
GO	GO_GASTRULATION	1.99753	0.0451152	P
GO	GO_NEGATIVE_REGULATION_OF_CELLULAR_RESPONSE_TO_OXIDATIVE_STRESS	1.99707	0.0450906	P
GO	GO_REGULATION_OF_MYELOID_CELL_DIFFERENTIATION	1.99699	0.0449493	P
GO	GO_POSITIVE_REGULATION_OF_CELL_PROJECTION_ORGANIZATION	1.99665	0.0448849	P
GO	GO_HELICASE_ACTIVITY	-1.99595	0.0350401	N
GO	GO_MYELOID_CELL_DIFFERENTIATION	-1.99515	0.0297184	N
GO	GO_GLYCEROPHOSPHOLIPID_METABOLIC_PROCESS	-1.99466	0.0297316	N
GO	GO_BIOLOGICAL_ADHESION	-1.99441	0.0296948	N
KEGG	KEGG_FATTY_ACID_METABOLISM	-1.99439	0.0238962	N
GO	GO_PROTEIN_LOCALIZATION_TO_NUCLEUS	1.99402	0.0454251	P
GO	GO_MIDGUT_DEVELOPMENT	1.99381	0.0453204	P
GO	GO_CELL_DEVELOPMENT	-1.99377	0.02973	N
GO	GO_RESPONSE_TO_ACID_CHEMICAL	1.99353	0.045254	P
GO	GO_SIGNAL_TRANSDUCTION_BY_P53_CLASS_MEDIATOR	-1.99301	0.0297981	N
GO	GO_NEGATIVE_REGULATION_OF_B_CELL_ACTIVATION	-1.99248	0.0298089	N
GO	GO_MULTIVESICULAR_BODY_SORTING_PATHWAY	-1.99087	0.030012	N
GO	GO_RNA_METHYLATION	1.99065	0.0458829	P
GO	GO_DEVELOPMENTAL_PROGRAMMED_CELL_DEATH	-1.99019	0.0300575	N
GO	GO_CYTOPLASMIC_REGION	1.99012	0.0220205	P
GO	GO_MATING	1.98963	0.0459985	P
GO	GO_MODIFICATION_OF_MORPHOLOGY_OR_PHYSIOLOGY_OF_OTHER_ORGANISM	1.98874	0.0460918	P
GO	GO_NEGATIVE_REGULATION_OF_DEFENSE_RESPONSE	-1.98823	0.0303479	N
GO	GO_REGULATION_OF_PHOSPHOLIPASE_A2_ACTIVITY	1.9881	0.0461083	P
GO	GO_PROTEIN_COMPLEX_ASSEMBLY	1.98797	0.0459914	P
GO	GO_PROTEIN_COMPLEX_BIOGENESIS	1.98641	0.0462868	P
GO	GO_ANATOMICAL_STRUCTURE_HOMEOSTASIS	-1.98632	0.0306181	N
GO	GO_POSITIVE_REGULATION_OF_B_CELL_PROLIFERATION	-1.98505	0.0307834	N
GO	GO_ALTERNATIVE_MRNA_SPLICING_VIA_SPLICEOSOME	1.9838	0.0468495	P
GO	GO_SUPRAMOLECULAR_FIBER	-1.98366	0.027803	N
GO	GO_FATTY_ACID_BETA_OXIDATION	-1.98332	0.0310175	N
GO	GO_REGULATION_OF_LIPOPOLYSACCHARIDE_MEDIATED_SIGNALING_PATHWAY	1.98196	0.0471914	P
GO	GO_NEGATIVE_REGULATION_OF_T_CELL_PROLIFERATION	-1.98181	0.0312199	N
GO	GO_POSITIVE_REGULATION_OF_ACTIVATED_T_CELL_PROLIFERATION	-1.98148	0.0311994	N
GO	GO_REGULATION_OF_ACUTE_INFLAMMATORY_RESPONSE	-1.98123	0.0311597	N
GO	GO_CARBOHYDRATE_METABOLIC_PROCESS	1.9807	0.047404	P
GO	GO_RESPONSE_TO_GROWTH_FACTOR	1.97833	0.0479102	P
GO	GO_INTERACTION_WITH_SYMBIONT	1.97828	0.0477713	P
GO	GO_MEMBRANE_LIPID_CATABOLIC_PROCESS	1.97826	0.0476237	P
GO	GO_RESPONSE_TO_ALCOHOL	-1.97554	0.0321579	N
GO	GO_SECRETORY_GRANULE_LUMEN	1.97473	0.0238379	P
GO	GO_POSITIVE_REGULATION_OF_INTERLEUKIN_10_PRODUCTION	-1.97379	0.0324134	N
GO	GO_CILIUM_ORGANIZATION	-1.97333	0.0324177	N
GO	GO_DNA_LIGATION_INVOLVED_IN_DNA_REPAIR	-1.97327	0.0323482	N
GO	GO_PROTEIN_ACYLATION	1.97279	0.0490033	P
GO	GO_NEGATIVE_REGULATION_OF_CELL_CYCLE	-1.96981	0.0329462	N
GO	GO_LYTIC_VACUOLE_MEMBRANE	1.96927	0.0243978	P
GO	GO_CELLULAR_RESPONSE_TO_EXTRACELLULAR_STIMULUS	1.96879	0.0499963	P
GO	GO_INTERFERON_GAMMA_PRODUCTION	-1.96763	0.0332918	N
GO	GO_CELLULAR_RESPONSE_TO_INTERLEUKIN_4	-1.96763	0.0332079	N
GO	GO_MOTOR_ACTIVITY	-1.96696	0.0410074	N
GO	GO_DNA_PACKAGING_COMPLEX	-1.96503	0.0303899	N
GO	GO_EARLY_ENDOSOME_MEMBRANE	-1.9641	0.0298932	N
GO	GO_CENTROMERE_COMPLEX_ASSEMBLY	-1.95996	0.0346367	N
GO	GO_SHORT_CHAIN_FATTY_ACID_METABOLIC_PROCESS	-1.95928	0.0346831	N
HALLMARK	HALLMARK_ANGIOGENESIS	1.95867	0.0130803	P
GO	GO_FATTY_ACID_BETA_OXIDATION_USING_ACYL_COA_DEHYDROGENASE	-1.95433	0.0355963	N
GO	GO_POSITIVE_REGULATION_OF_REACTIVE_OXYGEN_SPECIES_BIOSYNTHETIC_PROCESS	-1.95106	0.0362031	N
GO	GO_REGULATION_OF_PROTEIN_COMPLEX_DISASSEMBLY	-1.95046	0.0362462	N
GO	GO_WNT_SIGNALING_PATHWAY_CALCIUM_MODULATING_PATHWAY	-1.94979	0.0363024	N
GO	GO_NEGATIVE_REGULATION_OF_CELL_DIVISION	-1.94531	0.0371675	N
GO	GO_HUMORAL_IMMUNE_RESPONSE	-1.94514	0.0371115	N
GO	GO_ER_TO_GOLGI_TRANSPORT_VESICLE	-1.94373	0.0330157	N
GO	GO_REGULATION_OF_INTERFERON_BETA_PRODUCTION	-1.94225	0.0376138	N
GO	GO_RESPONSE_TO_INORGANIC_SUBSTANCE	-1.93726	0.0386371	N
GO	GO_CHROMATIN_ASSEMBLY_OR_DISASSEMBLY	-1.93675	0.0386492	N
GO	GO_PEPTIDYL_AMINO_ACID_MODIFICATION	-1.93308	0.0393943	N
GO	GO_INTERSTRAND_CROSS_LINK_REPAIR	-1.93292	0.0393333	N
GO	GO_NEGATIVE_REGULATION_OF_IMMUNE_EFFECTOR_PROCESS	-1.92887	0.0401728	N
GO	GO_T_CELL_HOMEOSTASIS	-1.92866	0.0401232	N
GO	GO_MONOCYTE_CHEMOTAXIS	-1.92761	0.0402593	N
GO	GO_RUFFLE	1.92648	0.0308721	P
GO	GO_REGULATION_OF_LEUKOCYTE_MIGRATION	-1.9263	0.0404714	N
GO	GO_MEMBRANE_REGION	1.92597	0.0306192	P
GO	GO_REGULATION_OF_TRANSFORMING_GROWTH_FACTOR_BETA_PRODUCTION	-1.91911	0.0420841	N
GO	GO_REGULATION_OF_RAS_PROTEIN_SIGNAL_TRANSDUCTION	-1.91805	0.0422427	N
GO	GO_PYRIMIDINE_CONTAINING_COMPOUND_CATABOLIC_PROCESS	-1.91606	0.0426399	N
GO	GO_NEURON_PROJECTION	1.91434	0.0323378	P
GO	GO_CELL_PROLIFERATION	-1.91328	0.0432234	N
GO	GO_POSITIVE_REGULATION_OF_INTERFERON_GAMMA_BIOSYNTHETIC_PROCESS	-1.91282	0.0432413	N
GO	GO_REGULATION_OF_LEUKOCYTE_CHEMOTAXIS	-1.91061	0.0436856	N
GO	GO_COATED_VESICLE_MEMBRANE	-1.90551	0.0402197	N
KEGG	KEGG_DNA_REPLICATION	-1.90549	0.0381651	N
GO	GO_AGING	-1.90442	0.0451308	N
GO	GO_TELOMERASE_HOLOENZYME_COMPLEX	1.90223	0.034305	P
GO	GO_NEGATIVE_REGULATION_OF_PROTEIN_MODIFICATION_BY_SMALL_PROTEIN_CONJUGATION_OR_REMOVAL	-1.90114	0.0458907	N
GO	GO_POTASSIUM_ION_HOMEOSTASIS	-1.9002	0.0460222	N
GO	GO_RECEPTOR_COMPLEX	-1.89843	0.0410948	N
GO	GO_REGULATION_OF_DNA_DEPENDENT_DNA_REPLICATION	-1.89816	0.0464555	N
GO	GO_TRICARBOXYLIC_ACID_METABOLIC_PROCESS	-1.89802	0.0463839	N
HALLMARK	HALLMARK_KRAS_SIGNALING_DN	-1.89723	0.0128658	N
GO	GO_NEGATIVE_REGULATION_OF_T_CELL_APOPTOTIC_PROCESS	-1.89588	0.0468557	N
GO	GO_SPINDLE_MIDZONE	-1.89399	0.041386	N
GO	GO_NEGATIVE_REGULATION_OF_CELL_KILLING	-1.89227	0.0476971	N
GO	GO_TETRAHYDROFOLATE_METABOLIC_PROCESS	-1.89169	0.0477435	N
KEGG	KEGG_COMPLEMENT_AND_COAGULATION_CASCADES	-1.88723	0.0403662	N
GO	GO_EXOCYTIC_VESICLE	1.88578	0.0371621	P
HALLMARK	HALLMARK_OXIDATIVE_PHOSPHORYLATION	1.88533	0.0186851	P
GO	GO_POSITIVE_REGULATION_OF_T_CELL_CYTOKINE_PRODUCTION	-1.88531	0.0493905	N
GO	GO_DENDRITIC_CELL_CHEMOTAXIS	-1.88499	0.0493626	N
GO	GO_CELL_PART_MORPHOGENESIS	-1.8842	0.049454	N
KEGG	KEGG_APOPTOSIS	-1.88155	0.0398434	N
GO	GO_CHROMOSOME_TELOMERIC_REGION	-1.87642	0.0448774	N
GO	GO_DENDRITE	1.87024	0.0400662	P
GO	GO_SPECIFIC_GRANULE	1.86909	0.0399028	P
GO	GO_SPLICEOSOMAL_COMPLEX	1.8644	0.0405502	P
GO	GO_MICROTUBULE	-1.8636	0.0473549	N
GO	GO_PODOSOME	1.86292	0.0404911	P
GO	GO_MITOCHONDRIAL_PROTEIN_COMPLEX	1.86121	0.0405007	P
GO	GO_CELL_TRAILING_EDGE	-1.85834	0.0478083	N
GO	GO_EXTRINSIC_COMPONENT_OF_MEMBRANE	-1.85631	0.0474732	N
GO	GO_SMALL_NUCLEAR_RIBONUCLEOPROTEIN_COMPLEX	1.85152	0.0422892	P
KEGG	KEGG_P53_SIGNALING_PATHWAY	-1.85141	0.0451764	N
GO	GO_GOLGI_STACK	1.84746	0.0427841	P
GO	GO_ORGANELLAR_LARGE_RIBOSOMAL_SUBUNIT	1.83441	0.0454753	P
GO	GO_PROTEIN_KINASE_COMPLEX	1.83332	0.0452971	P
GO	GO_PROTEINACEOUS_EXTRACELLULAR_MATRIX	1.83062	0.0455622	P
GO	GO_PROTON_TRANSPORTING_V_TYPE_ATPASE_COMPLEX	1.83053	0.0451576	P
GO	GO_CELL_CORTEX	1.8216	0.0471175	P
GO	GO_INVADOPODIUM	1.81812	0.0475907	P
HALLMARK	HALLMARK_COAGULATION	1.72527	0.0413521	P

## Sheet: SSc cis-reg. genes GSEA
Databae	Term name	NES	P-value	FDR
KEGG	KEGG_ASTHMA	2.10232	0.00180759	0.104735
KEGG	KEGG_LYSOSOME	2.20824	0.00060048	0.105348
KEGG	KEGG_GLUTATHIONE_METABOLISM	2.025	0.00502513	0.111519
GO	GO_MHC_CLASS_II_PROTEIN_COMPLEX	2.34034	0.000598922	0.119833
GO	GO_PROTON_TRANSPORTING_TWO_SECTOR_ATPASE_COMPLEX_CATALYTIC_DOMAIN	2.15134	0.00217348	0.142432
GO	GO_GOLGI_ASSOCIATED_VESICLE	2.16843	0.00264604	0.19277
GO	GO_INORGANIC_ANION_TRANSMEMBRANE_TRANSPORTER_ACTIVITY	2.19293	0.00288541	0.251109
GO	GO_LIGAND_GATED_CHANNEL_ACTIVITY	2.12427	0.00259274	0.263614
GO	GO_OXIDOREDUCTASE_ACTIVITY_ACTING_ON_PEROXIDE_AS_ACCEPTOR	2.27034	0.00120289	0.292584
GO	GO_SYNAPTIC_MEMBRANE	1.88696	0.0119498	0.528492
KEGG	KEGG_METABOLISM_OF_XENOBIOTICS_BY_CYTOCHROME_P450	1.6078	0.0427011	0.535877
KEGG	KEGG_SPHINGOLIPID_METABOLISM	1.61245	0.0428399	0.629177
HALLMARK	HALLMARK_UV_RESPONSE_DN	1.70584	0.0247156	0.681865
GO	GO_MHC_PROTEIN_COMPLEX	1.75943	0.0194272	0.706162
GO	GO_MULTIVESICULAR_BODY	1.61363	0.0402576	0.730385
GO	GO_NADPH_BINDING	1.82951	0.0138149	0.75502
KEGG	KEGG_OTHER_GLYCAN_DEGRADATION	1.61644	0.0403048	0.771004
GO	GO_SYNAPTONEMAL_COMPLEX	1.64001	0.0363924	0.772491
GO	GO_VESICLE_LUMEN	1.66009	0.0317492	0.778212
GO	GO_STEROID_BINDING	1.63014	0.0365361	0.788298
GO	GO_SYNAPSE_PART	1.61372	0.0417235	0.796344
GO	GO_PHOSPHATIDYLSERINE_BINDING	1.6153	0.0396238	0.797756
GO	GO_COMPLEMENT_BINDING	1.63594	0.044059	0.81763
GO	GO_ACTIVE_ION_TRANSMEMBRANE_TRANSPORTER_ACTIVITY	1.67752	0.0321871	0.833371
GO	GO_SECRETORY_GRANULE_MEMBRANE	1.7603	0.0182685	0.843698
GO	GO_NUCLEOCYTOPLASMIC_TRANSPORTER_ACTIVITY	1.63844	0.0377396	0.86582
GO	GO_ENDOPLASMIC_RETICULUM_LUMEN	1.66033	0.0316063	0.874547
GO	GO_GOLGI_APPARATUS	1.68636	0.0263418	0.876661
GO	GO_OXIDOREDUCTASE_ACTIVITY_ACTING_ON_NAD_P_H_QUINONE_OR_SIMILAR_COMPOUND_AS_ACCEPTOR	1.58211	0.0448873	0.879949
GO	GO_GLUTATHIONE_PEROXIDASE_ACTIVITY	1.74611	0.0235877	0.882717
GO	GO_ANTIOXIDANT_ACTIVITY	1.68178	0.0334938	0.889707
GO	GO_ANION_TRANSMEMBRANE_TRANSPORTER_ACTIVITY	1.83079	0.0135827	0.899737
GO	GO_AMIDE_BINDING	1.64325	0.0365269	0.910837
GO	GO_REGULATION_OF_NECROTIC_CELL_DEATH	1.69371	0.0258026	0.950381
GO	GO_DNA_CATABOLIC_PROCESS	1.56284	0.0494146	0.954242
GO	GO_MODIFIED_AMINO_ACID_BINDING	1.86012	0.0122409	0.954781
GO	GO_NUCLEOTIDE_EXCISION_REPAIR_DNA_DAMAGE_RECOGNITION	1.69521	0.0304731	0.961117
GO	GO_NAD_BINDING	1.68543	0.0273807	0.961616
GO	GO_RESPONSE_TO_ISOQUINOLINE_ALKALOID	1.70117	0.0287196	0.969284
GO	GO_POSITIVE_REGULATION_OF_OSTEOBLAST_DIFFERENTIATION	1.69655	0.0274975	0.973025
GO	GO_ACTIVATION_OF_CYSTEINE_TYPE_ENDOPEPTIDASE_ACTIVITY	1.57091	0.0477897	0.977572
GO	GO_CELLULAR_RESPONSE_TO_DSRNA	1.70222	0.0298235	0.983472
GO	GO_MITOTIC_G2_DNA_DAMAGE_CHECKPOINT	1.66154	0.0351882	0.986892
GO	GO_POSITIVE_REGULATION_OF_ALCOHOL_BIOSYNTHETIC_PROCESS	1.67841	0.028651	0.988689
GO	GO_CYTOKINE_SECRETION	1.66445	0.0337771	0.988927
GO	GO_NEGATIVE_REGULATION_OF_INTRACELLULAR_SIGNAL_TRANSDUCTION	1.57523	0.047676	0.988988
GO	GO_CELLULAR_RESPONSE_TO_FATTY_ACID	1.58972	0.048888	0.989064
GO	GO_REGULATION_OF_PHAGOCYTOSIS	1.65653	0.0353152	0.994968
GO	GO_CELLULAR_RESPONSE_TO_ARSENIC_CONTAINING_SUBSTANCE	1.57604	0.0454177	0.996029
GO	GO_CARDIAC_MUSCLE_TISSUE_DEVELOPMENT	1.70354	0.0286172	0.997003
GO	GO_STEROID_METABOLIC_PROCESS	1.60854	0.0469066	0.997688
GO	GO_RESPONSE_TO_INORGANIC_SUBSTANCE	1.66602	0.033214	0.997972
GO	GO_KIDNEY_EPITHELIUM_DEVELOPMENT	1.68006	0.0271987	0.998243
GO	GO_RESPONSE_TO_ARSENIC_CONTAINING_SUBSTANCE	1.57776	0.048751	0.999234
GO	GO_RACEMASE_AND_EPIMERASE_ACTIVITY	1.69864	0.024916	0.999358
GO	GO_RAC_GUANYL_NUCLEOTIDE_EXCHANGE_FACTOR_ACTIVITY	1.74778	0.0216786	0.999763
GO	GO_CHLORIDE_TRANSPORT	2.26086	0.00122249	1
GO	GO_INORGANIC_ANION_TRANSPORT	2.22823	0.00223805	1
GO	GO_POSITIVE_REGULATION_OF_OSSIFICATION	2.13644	0.00181598	1
GO	GO_RHYTHMIC_BEHAVIOR	2.12423	0.00236967	1
GO	GO_T_CELL_MEDIATED_IMMUNITY	2.07291	0.00322516	1
GO	GO_POSITIVE_REGULATION_OF_INTERLEUKIN_8_PRODUCTION	2.02121	0.00443013	1
GO	GO_MITOTIC_G2_M_TRANSITION_CHECKPOINT	2.00948	0.00339118	1
GO	GO_RESPONSE_TO_ACIDIC_PH	1.9929	0.00462963	1
GO	GO_INTRA_S_DNA_DAMAGE_CHECKPOINT	1.97599	0.00503221	1
GO	GO_INORGANIC_ION_TRANSMEMBRANE_TRANSPORT	1.96307	0.00610874	1
GO	GO_RNA_SPLICING_VIA_ENDONUCLEOLYTIC_CLEAVAGE_AND_LIGATION	1.95957	0.0054315	1
GO	GO_REGULATION_OF_CHEMOKINE_PRODUCTION	1.90364	0.00729495	1
GO	GO_NEGATIVE_REGULATION_OF_T_CELL_PROLIFERATION	1.85753	0.0114943	1
GO	GO_REGULATION_OF_CATENIN_IMPORT_INTO_NUCLEUS	1.84804	0.0147147	1
GO	GO_CELLULAR_MONOVALENT_INORGANIC_CATION_HOMEOSTASIS	1.84327	0.0129302	1
GO	GO_ORGANONITROGEN_COMPOUND_CATABOLIC_PROCESS	1.83795	0.0126914	1
GO	GO_RESPONSE_TO_DSRNA	1.83625	0.011703	1
GO	GO_POSITIVE_REGULATION_OF_ERYTHROCYTE_DIFFERENTIATION	1.83203	0.0137368	1
GO	GO_REGULATION_OF_CELLULAR_PH	1.83136	0.0142943	1
GO	GO_REGULATION_OF_ENDOTHELIAL_CELL_MIGRATION	1.82558	0.0158014	1
GO	GO_EMBRYONIC_CRANIAL_SKELETON_MORPHOGENESIS	1.82431	0.0157058	1
GO	GO_NEGATIVE_REGULATION_OF_INTERFERON_GAMMA_PRODUCTION	1.80228	0.0167064	1
GO	GO_NONRIBOSOMAL_PEPTIDE_BIOSYNTHETIC_PROCESS	1.80082	0.0192616	1
GO	GO_MUSCLE_ORGAN_MORPHOGENESIS	1.79968	0.0165156	1
GO	GO_NUCLEOTIDE_EXCISION_REPAIR_DNA_DUPLEX_UNWINDING	1.79544	0.0157356	1
GO	GO_ZYMOGEN_ACTIVATION	1.78584	0.0168002	1
GO	GO_POSITIVE_REGULATION_OF_CHEMOKINE_PRODUCTION	1.78535	0.0176956	1
GO	GO_SPHINGOLIPID_BIOSYNTHETIC_PROCESS	1.78454	0.0186897	1
GO	GO_POSITIVE_REGULATION_OF_STRESS_ACTIVATED_PROTEIN_KINASE_SIGNALING_CASCADE	1.78203	0.016286	1
GO	GO_MESONEPHROS_DEVELOPMENT	1.77585	0.0197684	1
GO	GO_POSITIVE_REGULATION_OF_ERBB_SIGNALING_PATHWAY	1.76828	0.0168694	1
GO	GO_RESPONSE_TO_METAL_ION	1.76544	0.0175614	1
GO	GO_MONOVALENT_INORGANIC_CATION_HOMEOSTASIS	1.76537	0.0204902	1
GO	GO_BROWN_FAT_CELL_DIFFERENTIATION	1.7652	0.0178571	1
GO	GO_PROTEIN_MATURATION	1.76419	0.0214601	1
GO	GO_UBIQUINONE_METABOLIC_PROCESS	1.7523	0.0214073	1
GO	GO_REGULATION_OF_PH	1.74464	0.0219184	1
GO	GO_NEGATIVE_REGULATION_OF_GLUCOSE_TRANSPORT	1.74417	0.0196472	1
GO	GO_QUINONE_METABOLIC_PROCESS	1.74284	0.023582	1
GO	GO_DETECTION_OF_VISIBLE_LIGHT	1.74055	0.024684	1
GO	GO_GLUTATHIONE_METABOLIC_PROCESS	1.73293	0.0215076	1
GO	GO_CARDIAC_CHAMBER_MORPHOGENESIS	1.72243	0.0258586	1
GO	GO_CARDIAC_VENTRICLE_MORPHOGENESIS	1.71695	0.0249352	1
GO	GO_RESPONSE_TO_MORPHINE	1.71327	0.0262069	1
GO	GO_RESPONSE_TO_LEAD_ION	1.71318	0.0259209	1
GO	GO_CELLULAR_METABOLIC_COMPOUND_SALVAGE	1.71257	0.0296418	1
GO	GO_REGULATION_OF_EPITHELIAL_CELL_MIGRATION	1.70867	0.024728	1
GO	GO_CARDIAC_CHAMBER_DEVELOPMENT	1.70522	0.0248963	1
GO	GO_REGULATION_OF_CYSTEINE_TYPE_ENDOPEPTIDASE_ACTIVITY_INVOLVED_IN_APOPTOTIC_SIGNALING_PATHWAY	1.6704	0.029505	1
GO	GO_DETECTION_OF_ABIOTIC_STIMULUS	1.66785	0.030853	1
GO	GO_ANION_TRANSMEMBRANE_TRANSPORT	1.64992	0.0354425	1
GO	GO_TISSUE_REMODELING	1.6479	0.0378696	1
GO	GO_POSITIVE_REGULATION_OF_VASCULAR_ENDOTHELIAL_GROWTH_FACTOR_PRODUCTION	1.6432	0.0375985	1
GO	GO_NEGATIVE_REGULATION_OF_INTERLEUKIN_6_PRODUCTION	1.63923	0.0379003	1
GO	GO_ACTIVATION_OF_CYSTEINE_TYPE_ENDOPEPTIDASE_ACTIVITY_INVOLVED_IN_APOPTOTIC_SIGNALING_PATHWAY	1.63702	0.0331715	1
GO	GO_AORTA_MORPHOGENESIS	1.63335	0.0366899	1
GO	GO_REGULATION_OF_TRANSFORMING_GROWTH_FACTOR_BETA_PRODUCTION	1.63188	0.0440389	1
GO	GO_NEGATIVE_REGULATION_OF_BLOOD_VESSEL_ENDOTHELIAL_CELL_MIGRATION	1.63002	0.043	1
GO	GO_NUCLEOTIDE_EXCISION_REPAIR_PREINCISION_COMPLEX_ASSEMBLY	1.62443	0.039606	1
GO	GO_CELLULAR_MODIFIED_AMINO_ACID_CATABOLIC_PROCESS	1.61991	0.0415759	1
GO	GO_RESPONSE_TO_FLUID_SHEAR_STRESS	1.61247	0.0402901	1
GO	GO_CARDIAC_ATRIUM_DEVELOPMENT	1.61209	0.0414921	1
GO	GO_MESODERM_DEVELOPMENT	1.61053	0.0419198	1
GO	GO_POSITIVE_REGULATION_OF_CELL_PROLIFERATION	1.61017	0.0421866	1
GO	GO_DETOXIFICATION	1.60977	0.0392002	1
GO	GO_NEGATIVE_REGULATION_OF_RESPONSE_TO_EXTERNAL_STIMULUS	1.60133	0.0442584	1
GO	GO_LYMPHOCYTE_APOPTOTIC_PROCESS	1.59526	0.0473443	1
GO	GO_RESPONSE_TO_MUSCLE_STRETCH	1.59417	0.0470517	1
GO	GO_DIGESTIVE_SYSTEM_DEVELOPMENT	1.59376	0.0445247	1
GO	GO_STRESS_FIBER_ASSEMBLY	1.59135	0.0483578	1
GO	GO_POSITIVE_REGULATION_OF_PATHWAY_RESTRICTED_SMAD_PROTEIN_PHOSPHORYLATION	1.59126	0.0438475	1
GO	GO_RESPONSE_TO_ALKALOID	1.58984	0.0463774	1
GO	GO_NEGATIVE_REGULATION_OF_WOUND_HEALING	1.57902	0.0448923	1
